# Supplementary material
Source: Royal Society of Chemistry journal article supplement (doi:10.1039/d6ob00260a)
Supplement: d6ob00260a1.pdf [file d6ob00260a1.pdf]

*Supporting Information for*

**Asymmetric Oxidative Rearrangement of Tetrahydro- $\beta$ -Carbolines  
Catalyzed by Anionic Stereogenic-at-Cobalt(III) Complexes**

Bin-Bin Song, Zhen-Jiang Yu, Zi-Mu Liu, Qiongqiong Zhu, Hua-Jie Jiang\*, Chuan-Zhi Yao\*, and  
Jie Yu\*

*Department of Applied Chemistry, Anhui Province Engineering Laboratory for Green Pesticide Development and Application, and  
Anhui Province Key Laboratory of Crop Integrated Pest Management, Hefei, Anhui 230036, P. R. China*

\*E-mail: jieyu@ahau.edu.cn; jianghj@ahau.edu.cn; ychzh@ahau.edu.cn.

**Table of Contents**

|                                                                                   |    |
|-----------------------------------------------------------------------------------|----|
| 1. Introduction .....                                                             | 2  |
| 1.1. General Data .....                                                           | 2  |
| 1.2. Materials .....                                                              | 2  |
| 2. General Procedure for the Preparation of Substrates.....                       | 3  |
| 2.1 General Procedure for Preparation of Substrates <b>1a-1m</b> .....            | 3  |
| 2.2 General Procedure for Preparation of Substrates <b>1n-1r</b> .....            | 5  |
| 2.3 General Procedure for Preparation of Substrates <b>1s-1x</b> .....            | 6  |
| 2.4 General Procedure for Preparation of Substrates <b>1y</b> .....               | 7  |
| 3. Optimization of reaction conditions .....                                      | 9  |
| 4. Experimental Procedures of Asymmetric Reaction and Characterization Data ..... | 15 |
| 5. Synthetic Applications and Mechanistic Experiments .....                       | 28 |
| 5.1 Gram-scale reaction and the synthesis of (-)-Coerulescine .....               | 28 |
| 5.2 Synthesis of seven-membered ring substrates <b>2y</b> .....                   | 29 |
| 5.3 Non-Linear Effects .....                                                      | 30 |
| 5.4 Isotopic labeling experiment .....                                            | 31 |
| 5.5 Control Experiment .....                                                      | 32 |
| 6. References .....                                                               | 34 |
| 7. NMR Spectra and HPLC Chromatograms .....                                       | 35 |

## 1. Introduction

### 1.1. General Data

<sup>1</sup>H NMR, <sup>13</sup>C NMR, and <sup>19</sup>F NMR spectra were recorded on an Agilent 600 NMR or Bruker-400 (or 500) MHz spectrometer at 600 MHz, 151 or 126 MHz, and 564 or 376 MHz using CDCl<sub>3</sub> as solvent, respectively. <sup>1</sup>H NMR data are reported as follows: δ, chemical shift; coupling constants (*J* are given in Hertz, Hz) and integration. Abbreviations to denote the multiplicity of a particular signal were s (singlet), d (doublet), t (triplet), q (quartet) and m (multiplet). Chemical shifts were reported in ppm from the tetramethylsilane with the solvent resonance as internal standard. Melting points were measured on a digital melting point apparatus and the temperature was uncorrected. High resolution mass spectrometric measurements (HRMS) were performed by the Waters Xevo G2-XS TOF (ESI Source). HPLC analysis was performed on Waters-Breeze (2487 Dual λ Absorbance Detector and 1525 Binary HPLC Pump, UV detection monitored at 254 nm). Chiralpak AD, AS, OJ, and OD columns were purchased from Daicel Chemical Industries, Ltd. Optical rotations were recorded on an Anton Paar MCP-100 polarimeter. Analytical-grade solvents for the column chromatography and commercially available reagents were used as received. *m*-Chloroperoxybenzoic acid was purified prior to use.

### 1.2. Materials

Analytical-grade solvents were used for column chromatography, and all commercially available reagents were used as received unless otherwise noted. *m*-CPBA was purified prior to use, and chloroform was distilled and dried before use. Catalysts (**Λ-1a** to **Λ-1e**) are known compounds and were synthesized according to the reported literature procedures.<sup>[1]</sup> Indoles **1a–1g** and **1l–1w** are known compounds and were prepared following previously reported procedures,<sup>[2–4]</sup> with their spectral data consistent with those reported in the literature. Indoles **1h–1k** and **1x** are new compounds and were synthesized according to the reported procedure.<sup>[2–4]</sup>

## 2. General Procedure for the Preparation of Substrates

### 2.1 General Procedure for Preparation of Substrates 1a-1m

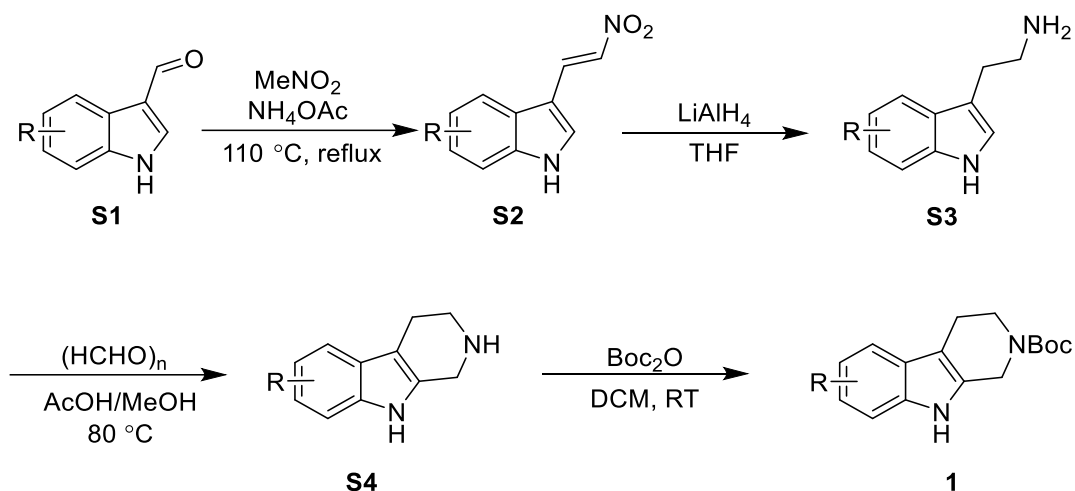

**Step 1:** Procedure for the synthesis of **S2**: To a solution of **S1** (1.0 equiv, 10 mmol) in nitromethane (15 mL) was added ammonium acetate (1.54 g, 2.0 equiv, 20 mmol). The reaction mixture was heated at 110 °C in an oil bath under reflux for 3 h. After cooling to room temperature, the organic layer was separated, and the aqueous phase was extracted with DCM (3 × 50 mL). The combined organic layers were washed with brine, dried over anhydrous Na<sub>2</sub>SO<sub>4</sub>, and concentrated under reduced pressure. The resulting crude nitroolefin **S2** was used directly in subsequent transformations without further purification.

**Step 2:** Procedure for the synthesis of **S3**: LiAlH<sub>4</sub> (1.9 g, 5.0 equiv, 50 mmol) was dissolved in anhydrous THF (to give a 2.5 M solution), and the corresponding nitroolefin **S2** was added dropwise at 0 °C. The reaction mixture was heated under reflux in an oil bath for 5 h and then allowed to cool to room temperature. The reaction was carefully quenched by the sequential addition of H<sub>2</sub>O (1 mL) and 10% aqueous NaOH (2 mL) at 0 °C. The resulting mixture was filtered through Celite and washed with ethyl acetate (3 × 50 mL). The filtrate was concentrated under reduced pressure to afford the desired product **S3**.

**Step 3:** Procedure for the synthesis of **S4**: To a solution of substituted tryptamine **S3** (1.0 equiv, 10 mmol) in a mixture of AcOH/MeOH (v/v = 2:5, 28 mL) was added paraformaldehyde (360 mg, 1.2 equiv, 12 mmol). The reaction mixture was heated at 80 °C for 3 h and then cooled to 0 °C. The mixture was basified to pH 9–10 by the sequential addition of saturated aqueous NaOH and NaHCO<sub>3</sub>

solutions (NaOH to pH 4–5, followed by NaHCO<sub>3</sub> to pH 8, and finally a few drops of NaOH to adjust the pH to 9–10). The resulting mixture was extracted with DCM (3 × 30 mL). The combined organic layers were dried over anhydrous Na<sub>2</sub>SO<sub>4</sub>, filtered, and concentrated under reduced pressure to afford the crude amine **S4**.

**Step 4:** Procedure for the synthesis of **1**: At 0 °C, Boc<sub>2</sub>O (2.18 g, 1.0 equiv, 10 mmol) was added to a solution of the crude amine **S4** in DCM (15 mL). The reaction mixture was allowed to warm to room temperature and stirred at this temperature, with the reaction progress monitored by TLC. Upon completion (≈2 h), saturated aqueous NaHCO<sub>3</sub> (15 mL) was added. The layers were separated, and the aqueous phase was extracted with ethyl acetate (3 × 30 mL). The combined organic layers were dried over anhydrous Na<sub>2</sub>SO<sub>4</sub>, filtered, and concentrated under reduced pressure. Purification of the resulting crude residue by silica gel flash column chromatography (gradient elution with EtOAc in petroleum ether) afforded substrates **1a–1m**.

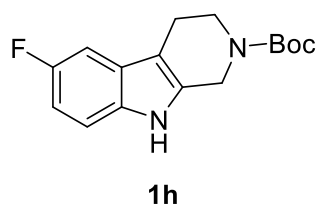

**tert-Butyl 6-fluoro-1,3,4,9-tetrahydro-2H-pyrido[3,4-b]indole-2-carboxylate 1h:** yield: 42% (1.218 g); (Flash column chromatography eluent, petrol ether/EtOAc = 3/1); yellow solid, m.p. 68.3–69.1 °C; <sup>1</sup>H NMR (600 MHz, CDCl<sub>3</sub>) δ 8.76 (s, 1H), 7.23 – 7.19 (m, 1H), 7.11 (d, *J* = 9.4 Hz, 1H), 6.91 – 6.85 (m, 1H), 4.72 – 4.57 (m, 2H), 3.80 – 3.72 (m, 2H), 2.75 (t, *J* = 5.8 Hz, 2H), 1.55 (s, 9H); <sup>13</sup>C NMR (151 MHz, CDCl<sub>3</sub>) δ 158.0 (d, *J* = 234.8 Hz), 155.6, 132.8, 127.5, 111.5, 109.7 (d, *J* = 25.2 Hz), 103.2, 80.5, 60.6, 42.7, 41.4, 28.7, 21.5, 14.3; <sup>19</sup>F NMR (565 MHz, CDCl<sub>3</sub>) δ -124.90 ppm; **HRMS (ESI)** calculated for C<sub>16</sub>H<sub>20</sub>FN<sub>2</sub>O<sub>2</sub> [M+H]<sup>+</sup>: 291.1509, found: 291.1510.

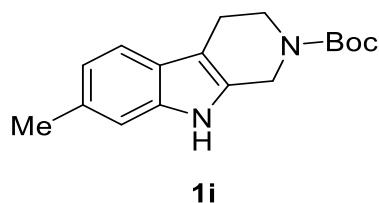

**tert-Butyl 7-methyl-1,3,4,9-tetrahydro-2H-pyrido[3,4-b]indole-2-carboxylate 1i:** yield: 45% (1.287 g); (Flash column chromatography eluent, petrol ether/EtOAc = 3/1); white solid. m.p. 103.7–

104.8 °C;  $^1\text{H NMR}$  (600 MHz,  $\text{CDCl}_3$ )  $\delta$  8.15 (s, 1H), 7.38 – 7.34 (m, 1H), 7.09 (s, 1H), 6.94 (d,  $J$  = 8.0 Hz, 1H), 4.63 (s, 2H), 3.76 (s, 2H), 2.79 (s, 2H), 2.45 (s, 3H), 1.53 (s, 9H);  $^{13}\text{C NMR}$  (151 MHz,  $\text{CDCl}_3$ )  $\delta$  155.5, 136.8, 131.5, 130.1, 125.0, 121.2, 117.6, 111.1, 80.2, 42.8, 41.9, 28.8, 28.2, 21.6; **HRMS (ESI)** calculated for  $\text{C}_{17}\text{H}_{23}\text{N}_2\text{O}_2$   $[\text{M}+\text{H}]^+$ : 287.1760, found: 287.1763.

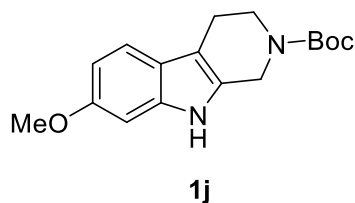

**tert-Butyl 7-methoxy-1,3,4,9-tetrahydro-2H-pyrido[3,4-b]indole-2-carboxylate 1j:** yield: 45% (1.431 g); (Flash column chromatography eluent, petrol ether/EtOAc = 3/1); white solid, m.p. 185.7–186.8 °C;  $^1\text{H NMR}$  (600 MHz,  $\text{CDCl}_3$ )  $\delta$  8.18 (s, 1H), 7.34 (d,  $J$  = 8.6 Hz, 1H), 6.83 (d,  $J$  = 2.3 Hz, 1H), 6.79 – 6.73 (m, 1H), 4.66 – 4.54 (m, 2H), 3.83 (s, 3H), 3.78 – 3.72 (m, 2H), 2.78 – 2.73 (m, 2H), 1.53 (s, 9H);  $^{13}\text{C NMR}$  (151 MHz,  $\text{CDCl}_3$ )  $\delta$  156.3, 137.1, 129.5, 121.6, 118.5, 109.0, 95.2, 80.2, 55.6, 42.7, 41.5, 28.6, 21.6.; **HRMS (ESI)** calculated for  $\text{C}_{17}\text{H}_{22}\text{N}_2\text{NaO}_4$   $[\text{M}+\text{Na}]^+$ : 325.1528, found: 325.1531.

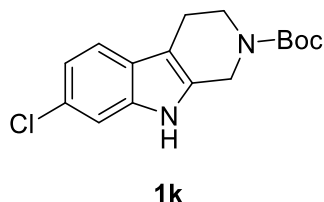

**tert-Butyl 7-chloro-1,3,4,9-tetrahydro-2H-pyrido[3,4-b]indole-2-carboxylate 1k:** yield: 45% (1.377 g); (Flash column chromatography eluent, petrol ether/EtOAc = 3/1); white solid, m.p. 196.7–197.8 °C;  $^1\text{H NMR}$  (600 MHz,  $\text{CDCl}_3$ )  $\delta$  8.72 (s, 1H), 7.36 (d,  $J$  = 8.4 Hz, 1H), 7.28 (s, 1H), 7.11 – 7.01 (m, 1H), 4.65 (s, 2H), 3.76 (s, 2H), 2.76 (s, 2H), 1.54 (s, 9H);  $^{13}\text{C NMR}$  (151 MHz,  $\text{CDCl}_3$ )  $\delta$  155.6, 136.7, 131.6, 127.4, 125.8, 120.1, 118.8, 111.0, 108.6, 80.5, 42.6, 41.3, 28.6, 21.5; **HRMS (ESI)** calculated for  $\text{C}_{16}\text{H}_{20}\text{ClN}_2\text{O}_2$   $[\text{M}+\text{H}]^+$ : 307.1213, found: 307.1216.

## 2.2 General Procedure for Preparation of Substrates 1n-1r

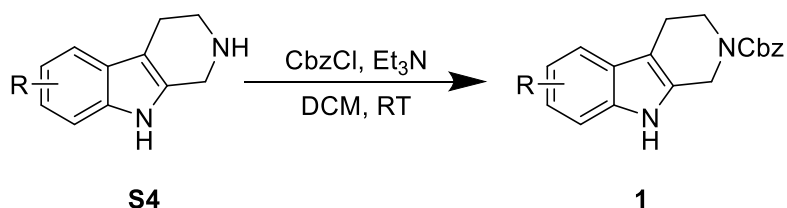

At 0 °C, to a solution of the crude amine **S4** in DCM (15 mL) was added Et<sub>3</sub>N (1.4 mL, 1.0 equiv, 10 mmol) and CbzCl (1.5 mL, 1.05 equiv, 10.5 mmol). The resulting mixture was allowed to warm to room temperature and stirred at the same temperature. The reaction progress was monitored by TLC. Upon completion (~ 2 h), a solution of saturated aqueous solution of NaHCO<sub>3</sub> (15 mL) was added. The layers were separated, and the aqueous layer was extracted with ethyl acetate (30 mL × 3). The combined organic layers were dried over anhydrous Na<sub>2</sub>SO<sub>4</sub>, filtered, and concentrated. Purification of the resulting crude residue via silica gel flash column chromatography (gradient eluent: EtOAc in petrol ether) afforded the substrate **1o-1r**. The spectral data of **1o-1r** have been reported in previous literatures<sup>[2-4]</sup>.

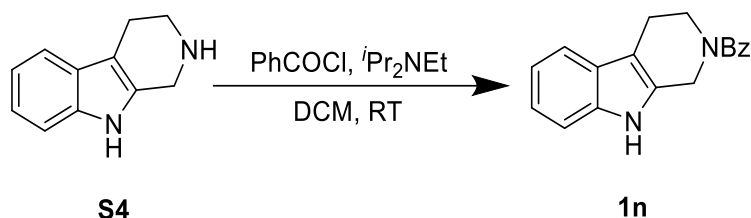

To a solution of **S4** (0.86 g, 5.0 mmol) in DCM (20 mL) was added *t*Pr<sub>2</sub>NEt (0.97 g, 1.5 equiv, 7.5 mmol) and benzoyl chloride (0.89 g, 1.5 equiv, 7.5 mmol) at 0 °C under N<sub>2</sub>. The resulting mixture was allowed to warm to room temperature and stirred at the same temperature. The reaction progress was monitored by TLC. Upon completion (~3 h), the solvent was evaporated to give the crude product, which was purified by flash column chromatography on silica gel (eluent: hexanes/DCM = 1:1 to 1:2) to afford pure **1n** as a brown solid. The spectral data of **1n** have been reported in previous literature<sup>[2]</sup>.

### 2.3 General Procedure for Preparation of Substrates 1s-1x

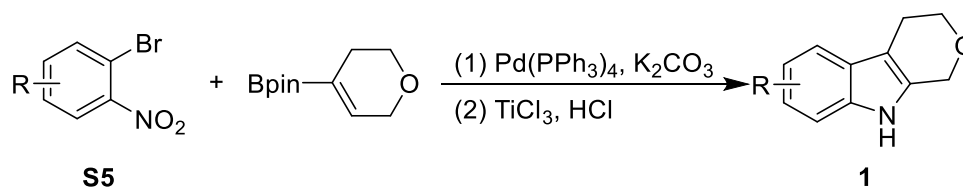

To a solution of **S5** (1.0 equiv, 10 mmol) and 1-cyclohexen-1-yl-boronic acid pinacol ester (2.5 g, 1.2 equiv, 12 mmol) in a mixed solvent of toluene, EtOH, and H<sub>2</sub>O (v/v/v = 5:2:1, 64 mL) were added Pd(PPh<sub>3</sub>)<sub>4</sub> (1.16 g, 10 mol%, 1 mmol) and K<sub>2</sub>CO<sub>3</sub> (5.5 g, 4.0 equiv, 40 mmol). The resultant mixture was then purged with N<sub>2</sub> and heated to 90 °C. The reaction progress was monitored by TLC. Upon completion (~24 h), the reaction mixture was cooled to room temperature and diluted with water (20 mL) and ethyl acetate (20 mL). The layers were separated, and the aqueous layer was extracted with

ethyl acetate (20 mL × 3). The combined organic layers were washed with water, dried over Na<sub>2</sub>SO<sub>4</sub>, and concentrated. The residue was dissolved in acetonitrile (40 mL) and water (40 mL). A solution of TiCl<sub>3</sub> (15-20% in 30% hydrochloric acid, 40 mL) was added. The mixture was stirred at room temperature and the progress was monitored by TLC. Upon completion (~5 h), the mixture was extracted with ethyl acetate (20 mL × 3). The combined organic layers were washed with a saturated aqueous NaHCO<sub>3</sub> solution and brine, then dried over Na<sub>2</sub>SO<sub>4</sub>, and concentrated. The residue was purified by column chromatography on silica gel to afford pure **1s-1x**. The spectral data of **1s-1w** have been reported in previous literatures<sup>[2-4]</sup>.

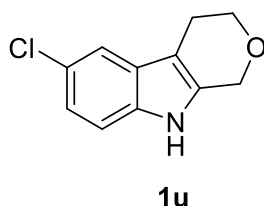

**6-Chloro-1,3,4,9-tetrahydropyrano[3,4-b]indole 1u:** yield: 65% (1.346 g); (Flash column chromatography eluent, petrol ether/EtOAc = 3/1); yellow solid, m.p. 116.7-117.8 °C; <sup>1</sup>H NMR (600 MHz, CDCl<sub>3</sub>) δ 7.81 (s, 1H), 7.24 – 7.19 (m, 1H), 7.17 – 7.11 (m, 1H), 6.93 – 6.86 (m, 1H), 4.82 – 4.78 (m, 2H), 4.06 – 4.00 (m, 2H), 2.84 – 2.75 (m, 2H); <sup>13</sup>C NMR (151 MHz, CDCl<sub>3</sub>) δ 134.7, 133.2, 132.2, 130.5, 128.4, 125.4, 121.9, 117.7, 112.0, 107.5, 75.2, 65.5, 63.6, 29.8, 25.0, 22.1; **HRMS (ESI)** calculated for C<sub>11</sub>H<sub>11</sub>ClNO [M+H]<sup>+</sup>: 208.0529, found: 208.0521.

## 2.4 General Procedure for Preparation of Substrates 1y

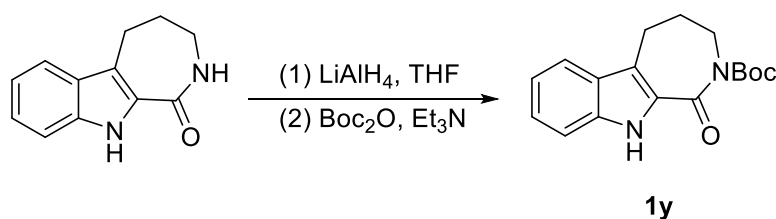

Under N<sub>2</sub> at room temperature, to a solution of 3,4,5,10-tetrahydroazepino[3,4 b]indol-1(2H)-one<sup>[5]</sup> (1.0 g, 5.0 mmol) in anhydrous THF (40 mL) was added LiAlH<sub>4</sub> (1.0 g, 5.0 equiv, 25.0 mmol). The mixture was heated to 90 °C and stirred for 6 h before it was cooled to 0 °C and treated successively with water (1 mL), a saturated aqueous NaOH solution (1 mL), and water (3.0 mL). This mixture was stirred for a few minutes and filtered. The filtrate was concentrated in vacuo to give the crude amine. The crude amine was redissolved in DCM (20 mL). To this solution were added Boc<sub>2</sub>O (1.09 g, 1.0

equiv, 5.0 mmol) and Et<sub>3</sub>N (505 mg, 1.0 equiv, 5.0 mmol). The mixture was stirred at room temperature, and the reaction progress was monitored by TLC. Upon completion (~ 2 h), the solvent was evaporated, and the residue was purified by column chromatography on silica gel (eluent: hexanes/ethyl acetate = 5:1) to afford the pure indole **1y** as a white solid (428 mg, 30% yield for two steps). Due to the substitution pattern of the amide functionality, this compound is a mixture of two conformational isomers. The spectral data of **1y** have been reported in previous literatures<sup>[2]</sup>.

### 3. Optimization of reaction conditions

**Table S1.** Optimization for solvent<sup>a</sup>.

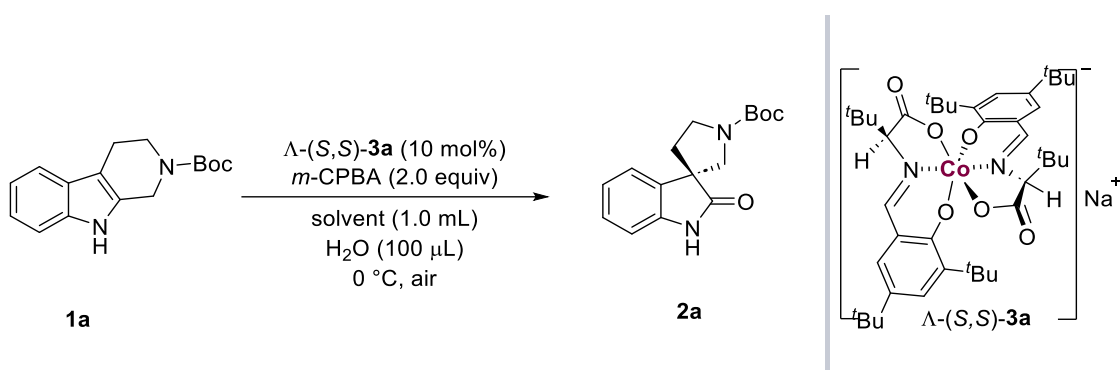

| entry | solvent            | yield (%) <sup>b</sup> | e.r. <sup>c</sup> |
|-------|--------------------|------------------------|-------------------|
| 1     | THF                | 40                     | 55.5:45.5         |
| 2     | CHCl <sub>3</sub>  | 62                     | 69:31             |
| 3     | Et <sub>2</sub> O  | 59                     | 67.5:32.5         |
| 4     | EtOAc              | 60                     | 61.5:38.5         |
| 5     | DCM                | 42                     | 74:26             |
| 6     | CH <sub>3</sub> CN | 43                     | 63:37             |
| 7     | TBME               | 60                     | 82.5:17.5         |
| 8     | 1,4-dioxane        | 63                     | 67.5:32.5         |
| 9     | Tol                | 20                     | 61:39             |
| 10    | Acetone            | 40                     | 65:35             |

<sup>a</sup> The reactions were carried out with **1a** (0.1 mmol), H<sub>2</sub>O (100  $\mu$ L),  $\Lambda$ -(S,S)-**3a** (10 mol%), and *m*-CPBA (0.2 mmol) in solvent (1.0 mL) at 0 °C. <sup>b</sup> Isolated yields were based on **1a**. <sup>c</sup> The e.r. values were determined by chiral stationary HPLC.

**Table S2.** Optimization for oxidant reagent<sup>a</sup>.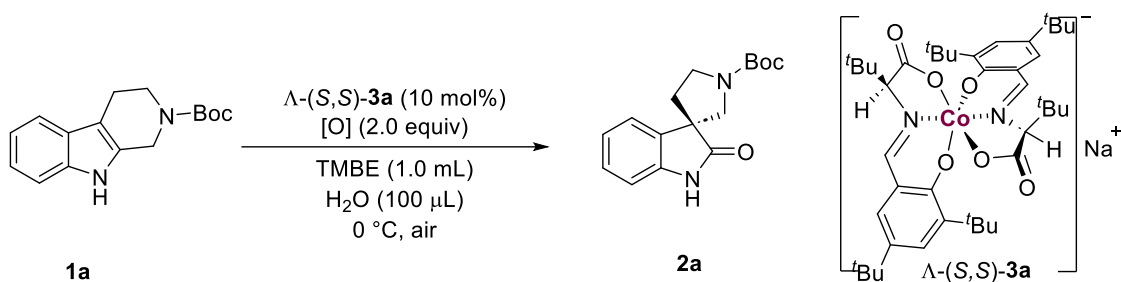

| entry | oxidant        | yield (%) <sup>b</sup> | e.r. <sup>c</sup> |
|-------|----------------|------------------------|-------------------|
| 1     | NCS            | 83                     | 53.5:46.5         |
| 2     | NBS            | 78                     | 76:24             |
| 3     | NIS            | 82                     | 68:32             |
| 4     | I <sub>2</sub> | 80                     | 56.5:43.5         |
| 5     | <i>m</i> -CPBA | 60                     | 82.5:17.5         |

<sup>a</sup> The reactions were carried out with **1a** (0.1 mmol), H<sub>2</sub>O (100  $\mu$ L),  $\Delta$ -(S,S)-**3a** (10 mol%), and [O] (0.2 mmol) in TBME (1.0 mL) at 0 °C. <sup>b</sup> Isolated yields were based on **1a**. <sup>c</sup> The e.r. values were determined by chiral stationary HPLC.

**Table S3.** Optimization for chiral catalyst<sup>a</sup>.

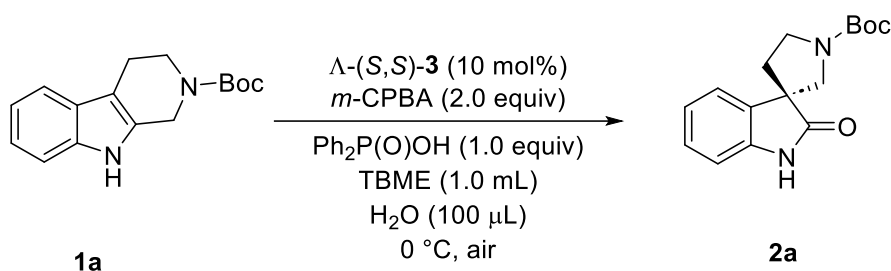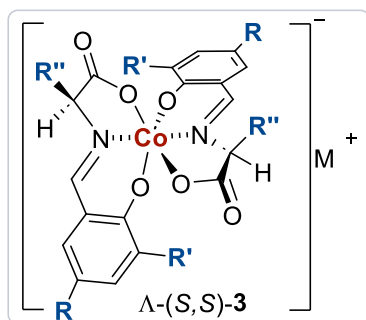

- 3a**, R = R' = R'' = <sup>t</sup>Bu, M = Na;  
**3b**, R = R' = R'' = <sup>t</sup>Bu, M = H;  
**3c**, R = R' = <sup>t</sup>Bu, R'' = <sup>i</sup>Pr, M = Na;  
**3d**, R = R' = <sup>t</sup>Bu, R'' = <sup>i</sup>Pr, M = H;  
**3e**, R = R' = <sup>t</sup>Amyl, R'' = <sup>i</sup>Pr, M = Na;  
**3f**, R = R' = <sup>t</sup>Amyl, R'' = <sup>t</sup>Bu, M = Na;  
**3g**, R = R' = <sup>t</sup>Amyl, R'' = <sup>t</sup>Bu, M = H;  
**3h**, R = R' = <sup>t</sup>Amyl, R'' = <sup>t</sup>Bu, M = Cs;

| entry | <b>3</b>                             | yield (%) <sup>b</sup> | e.r. <sup>c</sup> |
|-------|--------------------------------------|------------------------|-------------------|
| 1     | $\Lambda$ -( <i>S,S</i> )- <b>3a</b> | 56                     | 90:10             |
| 2     | $\Lambda$ -( <i>S,S</i> )- <b>3b</b> | 65                     | 83.5:16.5         |
| 3     | $\Lambda$ -( <i>S,S</i> )- <b>3c</b> | 52                     | 89:11             |
| 4     | $\Lambda$ -( <i>S,S</i> )- <b>3d</b> | 65                     | 83.5:16.5         |
| 5     | $\Lambda$ -( <i>S,S</i> )- <b>3e</b> | 36                     | 86:14             |
| 6     | $\Lambda$ -( <i>S,S</i> )- <b>3f</b> | 58                     | 86:14             |
| 7     | $\Lambda$ -( <i>S,S</i> )- <b>3g</b> | 58                     | 85.5:14.5         |
| 8     | $\Lambda$ -( <i>S,S</i> )- <b>3h</b> | 58                     | 78.5:21.5         |

<sup>a</sup> The reactions were carried out with **1a** (0.1 mmol), H<sub>2</sub>O (100 μL), Ph<sub>2</sub>P(O)OH (0.1 mmol),  $\Lambda$ -(*S,S*)-**3** (10 mol%), and *m*-CPBA (0.2 mmol) in TBME (1.0 mL) at 0 °C. <sup>b</sup> Isolated yields were based on **1a**. <sup>c</sup> The e.r. values were determined by chiral stationary HPLC.

**Table S4.** Optimization for acid<sup>a</sup>.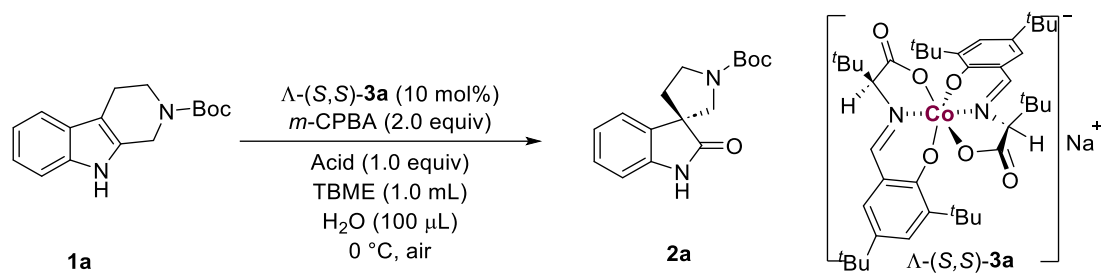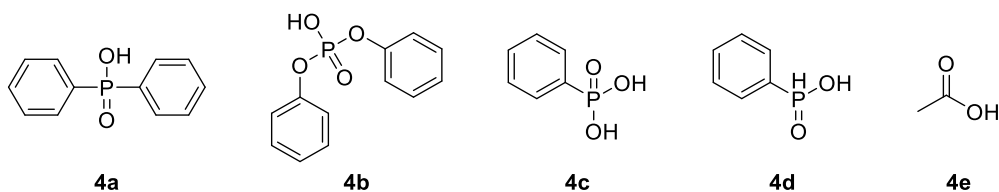

| entry | acid      | yield (%) <sup>b</sup> | e.r. <sup>c</sup> |
|-------|-----------|------------------------|-------------------|
| 1     | <b>4a</b> | 52                     | 90:10             |
| 2     | <b>4b</b> | 40                     | 61:39             |
| 3     | <b>4c</b> | 59                     | 55:45             |
| 4     | <b>4d</b> | 32                     | 67:33             |
| 5     | <b>4e</b> | 56                     | 90:10             |

<sup>a</sup>The reactions were carried out with **1a** (0.1 mmol), H<sub>2</sub>O (100  $\mu$ L),  $\Delta\text{-(S, S)-3a}$  (10 mol%), acid (0.1 mmol) and *m*-CPBA (0.2 mmol) in TBME (1.0 mL) at 0 °C. <sup>b</sup>Isolated yields were based on **1a**. <sup>c</sup>The e.r. values were determined by chiral stationary HPLC.

**Table S5.** Optimization for the equivalent of chiral catalysts and acid<sup>a</sup>.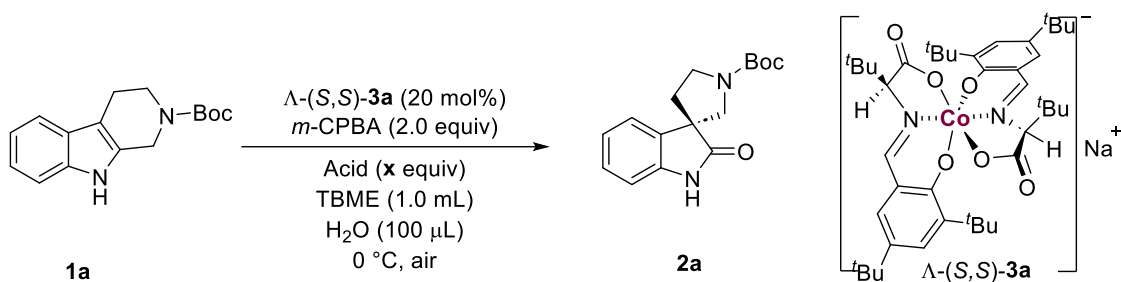

| entry | Acid      | x    | yield (%) <sup>b</sup> | e.r. <sup>c</sup> |
|-------|-----------|------|------------------------|-------------------|
| 1     | <b>4a</b> | 0.2  | 65                     | 92:8              |
| 2     | <b>4a</b> | 0.5  | 63                     | 92:8              |
| 3     | <b>4a</b> | 0.7  | 65                     | 94:6              |
| 4     | <b>4a</b> | 1.0  | 65                     | 92:8              |
| 5     | <b>4e</b> | 1.0  | 60                     | 91.5:8.5          |
| 6     | <b>4e</b> | 5.0  | 63                     | 92:8              |
| 7     | <b>4e</b> | 10.0 | 68                     | 94:6              |
| 8     | <b>4e</b> | 15.0 | 65                     | 91.5:8.5          |

<sup>a</sup> The reactions were carried out with **1a** (0.1 mmol), H<sub>2</sub>O (100 μL),  $\Lambda\text{-(S, S)-3a}$  (20 mol%), acid (x mmol), and *m*-CPBA (0.2 mmol) in TBME (1.0 mL) at 0 °C. <sup>b</sup> Isolated yields were based on **1a**. <sup>c</sup> The e.r. values were determined by chiral stationary HPLC.

**Table S6.** Optimization for mixed solvent<sup>a</sup>.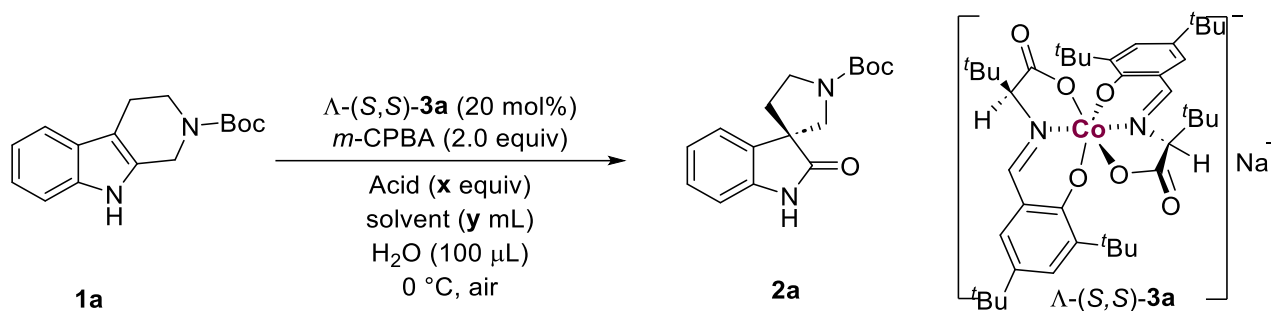

| entry | Acid      | x    | Solvent                      | y   | yield (%) <sup>b</sup> | e.r. <sup>c</sup> |
|-------|-----------|------|------------------------------|-----|------------------------|-------------------|
| 1     | <b>4a</b> | 0.7  | TBME/Tol (5:1)               | 1.2 | 62                     | 91:9              |
| 2     | <b>4a</b> | 0.7  | TBME/DCM (5:1)               | 1.2 | 60                     | 90:10             |
| 3     | <b>4a</b> | 0.7  | TBME/CHCl <sub>3</sub> (5:1) | 1.2 | 63                     | 91:9              |
| 4     | <b>4e</b> | 10.0 | TBME/Tol (5:1)               | 1.2 | 70                     | 92.5:7.5          |
| 5     | <b>4e</b> | 10.0 | TBME/DCM (5:1)               | 1.2 | 73                     | 92.5:7.5          |
| 6     | <b>4e</b> | 10.0 | TBME/CHCl <sub>3</sub> (5:1) | 1.2 | 66                     | 93:7              |
| 7     | <b>4e</b> | 10.0 | TBME/CHCl <sub>3</sub> (5:2) | 1.4 | 65                     | 93.5:6.5          |
| 8     | <b>4e</b> | 10.0 | TBME/CHCl <sub>3</sub> (5:3) | 1.6 | 68                     | 94.5:5.5          |

<sup>a</sup> The reactions were carried out with **1a** (0.1 mmol), H<sub>2</sub>O (100 μL), Δ-(S, S)-**3a** (20 mol%), acid (x mmol), and *m*-CPBA (0.2 mmol) in TBME/Solvent (y mL) at 0 °C. <sup>b</sup> Isolated yields were based on **1a**. <sup>c</sup> The e.r. values were determined by chiral stationary HPLC.

## 4. Experimental Procedures of Asymmetric Reaction and Characterization Data

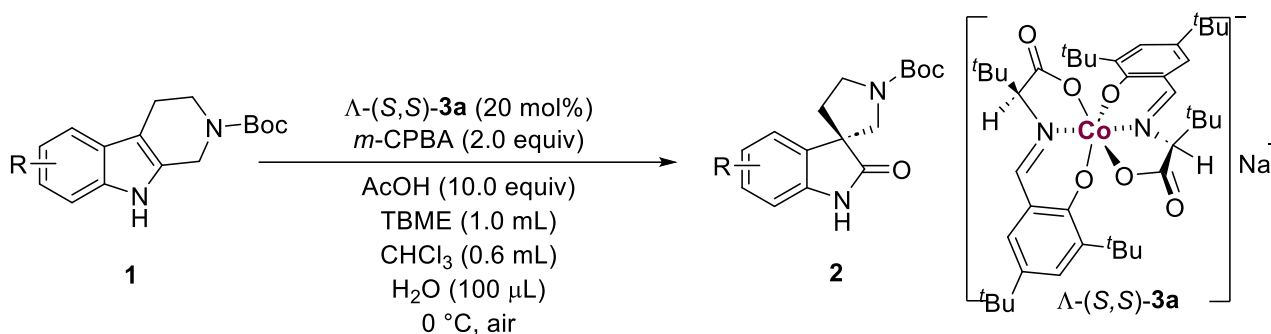

### General Procedure:

At room temperature, a 10 mL vial was charged with  $\Lambda$ -(*S,S*)-**3a** (16 mg, 20 mol%), H<sub>2</sub>O (100  $\mu$ L), AcOH (60  $\mu$ L), and indole **1** (0.10 mmol), after which a mixed solvent of TBME/CHCl<sub>3</sub> (1.6 mL, v/v = 5:3) was added. The resulting mixture was cooled to 0 °C and stirred for 20 min, followed by the addition of *m*-CPBA (34.5 mg, 2.0 equiv, 0.20 mmol). The reaction mixture was stirred at 0 °C, and the progress of the reaction was monitored by TLC. Upon completion, the reaction was quenched by the addition of saturated aqueous Na<sub>2</sub>S<sub>2</sub>O<sub>3</sub> solution (3 mL). The mixture was extracted with ethyl acetate (3  $\times$  10 mL). The combined organic layers were washed with saturated aqueous NaHCO<sub>3</sub> solution and brine, dried over anhydrous Na<sub>2</sub>SO<sub>4</sub>, filtered, and concentrated under reduced pressure. Purification of the residue by silica gel column chromatography afforded the pure product. Note: Compounds **2a–2m** were observed as a mixture of slowly interconverting rotamers in solution due to restricted rotation around the N–C(O) bond of the Boc carbamate. Accordingly, duplicated and/or broadened signals are observed in the <sup>1</sup>H and <sup>13</sup>C NMR spectra recorded at room temperature.

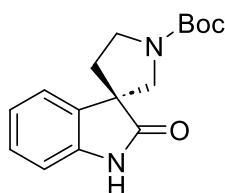

**2a**

**tert-Butyl (*R*)-2-oxospiro[indoline-3,3'-pyrrolidine]-1'-carboxylate **2a**:** yield: 68% (19.6 mg); flash column chromatography eluent, petroleum ether/ethyl acetate = 2/1; brown oil;  $[\alpha]_D^{20} = -21.2$  (c 0.13 CH<sub>2</sub>Cl<sub>2</sub>); <sup>1</sup>H NMR (600 MHz, CDCl<sub>3</sub>)  $\delta$  8.38/8.28 (s, 1H), 7.26 – 7.15 (m, 2H), 7.09 – 7.01 (m, 1H), 6.97 – 6.89 (m, 1H), 3.88 – 3.75 (m, 2H), 3.74 – 3.66 (m, 1H), 3.66 – 3.54 (m, 1H), 2.45 –

2.37 (m, 1H), 2.12 – 2.04 (m, 1H), 1.51/1.46 (s, 9H);  $^{13}\text{C}$  NMR (151 MHz,  $\text{CDCl}_3$ )  $\delta$  180.2, 154.6, 140.2, 133.2, 128.5, 123.0, 110.2, 80.0, 54.3, 53.0, 45.3, 36.5, 35.7, 28.6; **HRMS (ESI)** calculated for  $\text{C}_{16}\text{H}_{20}\text{N}_2\text{NaO}_3$   $[\text{M}+\text{Na}]^+$ : 311.1472, found: 311.1475; **Enantiomeric ratio**: 94.5:5.5, determined by HPLC (Daicel Chirapak AD, isopropanol / hexane = 10/90, flow rate = 1.0 mL/min,  $T = 30^\circ\text{C}$ ,  $\lambda = 254$  nm):  $t_{\text{R}} = 8.80$  min (minor),  $t_{\text{R}} = 12.25$  min (major). The absolute configuration of **2a** was assigned by comparison of its optical rotation with the reported literature data<sup>[2]</sup>.

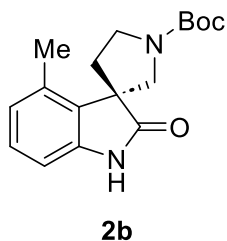

**tert-Butyl (R)-4-methyl-2-oxospiro[indoline-3,3'-pyrrolidine]-1'-carboxylate 2b**: yield: 60% (18.1 mg); flash column chromatography eluent, petroleum ether/ethyl acetate = 2/1; colorless oil;  $[\alpha]_{\text{D}}^{20} = -20.8$  (c 0.08  $\text{CH}_2\text{Cl}_2$ );  $^1\text{H}$  NMR (600 MHz,  $\text{CDCl}_3$ )  $\delta$  8.58/8.46 (s, 1H), 7.12 (t,  $J = 7.8$  Hz, 1H), 6.86 – 6.80 (m, 1H), 6.78 – 6.70 (m, 1H), 3.89 – 3.71 (m, 4H), 2.46 – 2.38 (m, 1H), 2.35 (s, 3H), 2.26 – 2.16 (m, 1H), 1.50/1.46 (s, 9H);  $^{13}\text{C}$  NMR (151 MHz,  $\text{CDCl}_3$ )  $\delta$  182.2, 154.2, 141.0, 134.6, 128.5, 125.5, 107.9, 79.9, 52.0, 45.7, 34.0, 29.8, 28.6, 18.0; **HRMS (ESI)** calculated for  $\text{C}_{17}\text{H}_{22}\text{N}_2\text{NaO}_3$   $[\text{M}+\text{Na}]^+$ : 325.1528, found: 325.1530; **Enantiomeric ratio**: 80.5:19.5, determined by HPLC (Daicel Chirapak AD, isopropanol / hexane = 10/90, flow rate = 1.0 mL/min,  $T = 30^\circ\text{C}$ ,  $\lambda = 254$  nm):  $t_{\text{R}} = 8.95$  min (minor),  $t_{\text{R}} = 11.95$  min (major).

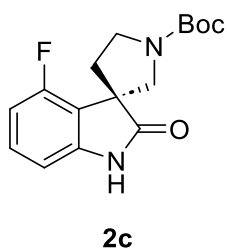

**tert-Butyl (R)-4-fluoro-2-oxospiro[indoline-3,3'-pyrrolidine]-1'-carboxylate 2c**: yield: 62% (19.0 mg); flash column chromatography eluent, petroleum ether/ethyl acetate = 2/1; colorless oil;  $[\alpha]_{\text{D}}^{20} = -15.3$  (c 0.12  $\text{CH}_2\text{Cl}_2$ );  $^1\text{H}$  NMR (600 MHz,  $\text{CDCl}_3$ )  $\delta$  7.87/7.80 (s, 1H), 7.23 – 7.17 (m, 1H), 6.78 – 6.64 (m, 2H), 3.88 – 3.83 (m, 1H), 3.83 – 3.76 (m, 2H), 3.76 – 3.71 (m, 1H), 2.43 – 2.37 (m, 1H), 2.37 – 2.32 (m, 1H), 1.50/1.46 (s, 9H);  $^{13}\text{C}$  NMR (151 MHz,  $\text{CDCl}_3$ )  $\delta$  180.4, 158.9 (d,  $J = 247.5$  Hz), 154.4, 142.6, 130.5, 110.5 (d,  $J = 21.2$  Hz), 106.3 (d,  $J = 3.8$  Hz), 79.9, 53.0, 52.5, 45.5, 34.9,

29.9;  $^{19}\text{F}$  NMR (376 MHz,  $\text{CDCl}_3$ )  $\delta$  -118.99 ppm; **HRMS (ESI)** calculated for  $\text{C}_{16}\text{H}_{19}\text{FN}_2\text{NaO}_3$   $[\text{M}+\text{Na}]^+$ : 329.1277, found: 329.1281; **Enantiomeric ratio**: 94.5:5.5, determined by HPLC (Daicel Chirapak AD, isopropanol / hexane = 10/90, flow rate = 1.0 mL/min,  $T = 30\text{ }^\circ\text{C}$ ,  $\lambda = 254\text{ nm}$ ):  $t_{\text{R}} = 8.06\text{ min}$  (minor),  $t_{\text{R}} = 13.57\text{ min}$  (major).

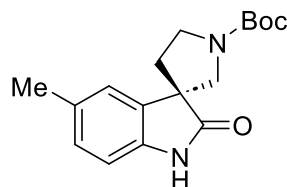

**2d**

**tert-Butyl (R)-5-methyl-2-oxospiro[indoline-3,3'-pyrrolidine]-1'-carboxylate 2d**: yield: 62% (18.7 mg); flash column chromatography eluent, petroleum ether/ethyl acetate = 2/1; colorless oil;  $[\alpha]_{\text{D}}^{20} = -21.4$  (c 0.18  $\text{CH}_2\text{Cl}_2$ );  $^1\text{H}$  NMR (600 MHz,  $\text{CDCl}_3$ )  $\delta$  8.75/8.65 (s, 1H), 7.09 – 6.94 (m, 2H), 6.87 – 6.77 (m, 1H), 3.88 – 3.75 (m, 2H), 3.73 – 3.65 (m, 1H), 3.65 – 3.53 (m, 1H), 2.44 – 2.39 (m, 1H), 2.32 (s, 3H), 2.10 – 2.02 (m, 1H), 1.52/1.46 (s, 9H);  $^{13}\text{C}$  NMR (151 MHz,  $\text{CDCl}_3$ )  $\delta$  180.5, 154.7, 137.8, 133.4, 132.7, 128.8, 123.6, 109.9, 80.0, 54.6, 53.6, 45.6, 36.5, 28.7, 21.3; **HRMS (ESI)** calculated for  $\text{C}_{17}\text{H}_{22}\text{N}_2\text{NaO}_3$   $[\text{M}+\text{Na}]^+$ : 325.1528, found: 325.1533; **Enantiomeric ratio**: 93:7, determined by HPLC (Daicel Chirapak AD, isopropanol / hexane = 10/90, flow rate = 1.0 mL/min,  $T = 30\text{ }^\circ\text{C}$ ,  $\lambda = 254\text{ nm}$ ):  $t_{\text{R}} = 7.95\text{ min}$  (minor),  $t_{\text{R}} = 12.23\text{ min}$  (major).

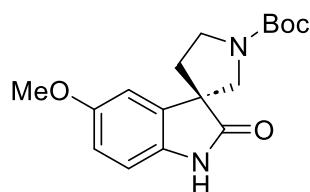

**2e**

**tert-Butyl (R)-5-methoxy-2-oxospiro[indoline-3,3'-pyrrolidine]-1'-carboxylate 2e**: yield: 65% (20.7 mg); flash column chromatography eluent, petroleum ether/ethyl acetate = 2/1; colorless oil;  $[\alpha]_{\text{D}}^{20} = -38.8$  (c 0.092  $\text{CH}_2\text{Cl}_2$ );  $^1\text{H}$  NMR (600 MHz,  $\text{CDCl}_3$ )  $\delta$  8.78/8.70 (s, 1H), 6.87 – 6.82 (m, 1H), 6.80 – 6.75 (m, 2H), 3.89 – 3.81 (m, 1H), 3.77 (s, 3H), 3.76 – 3.69 (m, 2H), 3.64 – 3.52 (m, 1H), 2.43 – 2.38 (m, 1H), 2.08 – 2.02 (m, 1H), 1.54/1.45 (s, 9H);  $^{13}\text{C}$  NMR (151 MHz,  $\text{CDCl}_3$ )  $\delta$  180.1, 156.4, 154.5, 134.6, 133.5, 112.9, 110.5, 110.2, 80.0, 56.0, 54.5, 45.3, 36.5, 35.7, 28.6; **HRMS (ESI)** calculated for  $\text{C}_{17}\text{H}_{22}\text{N}_2\text{NaO}_4$   $[\text{M}+\text{Na}]^+$ : 341.1477, found: 341.1477; **Enantiomeric ratio**: 91:9, determined by HPLC (Daicel Chirapak AD, isopropanol / hexane = 10/90, flow rate = 1.0 mL/min,  $T = 30\text{ }^\circ\text{C}$ ,  $\lambda = 254\text{ nm}$ ):  $t_{\text{R}} = 7.95\text{ min}$  (minor),  $t_{\text{R}} = 12.23\text{ min}$  (major).

= 30 °C,  $\lambda$  = 254 nm):  $t_R$  = 12.30 min (minor),  $t_R$  = 18.42 min (major).

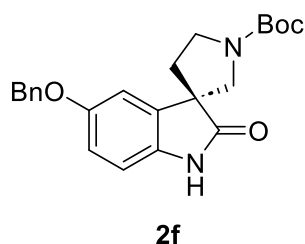

**tert-Butyl (R)-5-(benzyloxy)-2-oxospiro[indoline-3,3'-pyrrolidine]-1'-carboxylate 2f:** yield: 58% (22.9 mg); flash column chromatography eluent, petroleum ether/ethyl acetate = 2/1; colorless oil;  $[\alpha]_D^{20}$  = -27.3 (c 0.10 CH<sub>2</sub>Cl<sub>2</sub>); **<sup>1</sup>H NMR** (600 MHz, CDCl<sub>3</sub>)  $\delta$  8.04/7.96 (s, 1H), 7.47 – 7.23 (m, 5H), 6.93 – 6.75 (m, 3H), 5.01 (s, 2H), 3.82 – 3.66 (m, 4H), 2.45 – 2.37 (m, 1H), 2.07 – 2.00 (m, 1H), 1.51/1.46 (s, 9H); **<sup>13</sup>C NMR** (151 MHz, CDCl<sub>3</sub>)  $\delta$  178.0, 155.5, 154.5, 136.9, 134.6, 133.9, 128.7, 128.2, 127.7, 114.0, 111.3, 110.5, 80.0, 71.0, 54.5, 53.0, 45.3, 35.6, 29.7; **HRMS (ESI)** calculated for C<sub>23</sub>H<sub>26</sub>N<sub>2</sub>NaO<sub>4</sub> [M+Na]<sup>+</sup>: 417.1790, found: 417.1795; **Enantiomeric ratio:** 89:11, determined by HPLC (Daicel Chirapak AD, isopropanol / hexane = 10/90, flow rate = 1.0 mL/min, T = 30 °C,  $\lambda$  = 254 nm):  $t_R$  = 13.62 min (minor),  $t_R$  = 14.64 min (major).

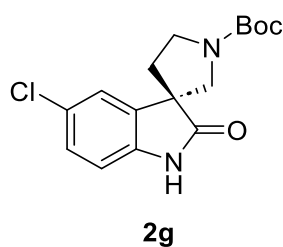

**tert-Butyl (R)-5-chloro-2-oxospiro[indoline-3,3'-pyrrolidine]-1'-carboxylate 2g:** yield: 68% (21.9 mg); flash column chromatography eluent, petroleum ether/ethyl acetate = 2/1; colorless oil;  $[\alpha]_D^{20}$  = -16.5 (c 0.21 CH<sub>2</sub>Cl<sub>2</sub>); **<sup>1</sup>H NMR** (600 MHz, CDCl<sub>3</sub>)  $\delta$  8.20/8.14 (s, 1H), 7.25 – 7.11 (m, 2H), 6.88 – 6.81 (m, 1H), 3.90 – 3.81 (m, 1H), 3.76 – 3.69 (m, 2H), 3.65 – 3.53 (m, 1H), 2.45 – 2.39 (m, 1H), 2.07 (m, 1H), 1.52/1.47 (s, 9H); **<sup>13</sup>C NMR** (151 MHz, CDCl<sub>3</sub>)  $\delta$  179.9, 154.5, 138.9, 134.8, 134.5, 128.5, 123.4, 111.3, 80.3, 54.4, 53.9, 45.4, 35.6, 28.6; **HRMS (ESI)** calculated for C<sub>16</sub>H<sub>19</sub>ClN<sub>2</sub>NaO<sub>3</sub> [M+Na]<sup>+</sup>: 345.0982, found: 345.0986; **Enantiomeric ratio:** 92.5:7.5, determined by HPLC (Daicel Chirapak AD, isopropanol / hexane = 10/90, flow rate = 1.0 mL/min, T = 30 °C,  $\lambda$  = 254 nm):  $t_R$  = 7.70 min (minor),  $t_R$  = 13.57 min (major).

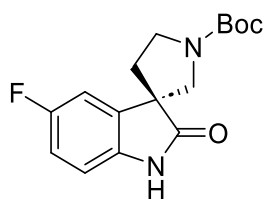

**2h**

**tert-Butyl (R)-5-fluoro-2-oxospiro[indoline-3,3'-pyrrolidine]-1'-carboxylate 2h**: yield: 63% (19.1 mg); flash column chromatography eluent, petroleum ether/ethyl acetate = 2/1; colorless oil;  $[\alpha]_D^{20} = -9.0$  (c 0.21 CH<sub>2</sub>Cl<sub>2</sub>); <sup>1</sup>H NMR (600 MHz, CDCl<sub>3</sub>) δ 8.43/8.37 (s, 1H), 6.98 – 6.82 (m, 3H), 3.91 – 3.75 (m, 2H), 3.74 – 3.70 (m, 1H), 3.65 – 3.53 (m, 1H), 2.46 – 2.39 (m, 1H), 2.10 – 2.04 (m, 1H), 1.51/1.46 (s, 9H); <sup>13</sup>C NMR (151 MHz, CDCl<sub>3</sub>) δ 180.2, 159.5 (d, *J* = 242.0 Hz), 154.5, 136.2, 115.0 (d, *J* = 23.1 Hz), 110.9 (d, *J* = 7.8 Hz), 80.2, 59.6, 54.2 (d, *J* = 48.0 Hz), 45.3, 38.3, 28.6; <sup>19</sup>F NMR (565 MHz, CDCl<sub>3</sub>) δ -119.58 ppm; **HRMS (ESI)** calculated for C<sub>16</sub>H<sub>19</sub>FN<sub>2</sub>NaO<sub>3</sub> [M+Na]<sup>+</sup>: 329.1277, found: 329.1281; **Enantiomeric ratio**: 94:6, determined by HPLC (Daicel Chirapak AD, isopropanol / hexane = 10/90, flow rate = 1.0 mL/min, T = 30 °C, λ = 254 nm): t<sub>R</sub> = 8.08 min (minor), t<sub>R</sub> = 14.03 min (major).

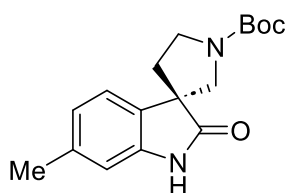

**2i**

**tert-Butyl (R)-6-methyl-2-oxospiro[indoline-3,3'-pyrrolidine]-1'-carboxylate 2i**: yield: 60% (18.1 mg); flash column chromatography eluent, petroleum ether/ethyl acetate = 2/1; colorless oil;  $[\alpha]_D^{20} = -9.5$  (c 0.25 CH<sub>2</sub>Cl<sub>2</sub>); <sup>1</sup>H NMR (600 MHz, CDCl<sub>3</sub>) δ 8.75/8.65 (s, 1H), 7.09 – 6.94 (m, 2H), 6.87 – 6.77 (m, 1H), 3.88 – 3.75 (m, 2H), 3.73 – 3.65 (m, 1H), 3.65 – 3.53 (m, 1H), 2.44 – 2.39 (m, 1H), 2.32 (s, 3H), 2.10 – 2.02 (m, 1H), 1.52/1.46 (s, 9H); <sup>13</sup>C NMR (151 MHz, CDCl<sub>3</sub>) δ 180.9, 154.6, 140.4, 138.8, 130.3, 123.6, 122.6, 111.1, 80.0, 54.6, 53.3, 45.6, 36.6, 28.7, 21.7; **HRMS (ESI)** calculated for C<sub>17</sub>H<sub>22</sub>N<sub>2</sub>NaO<sub>3</sub> [M+Na]<sup>+</sup>: 325.1528, found: 325.1533; **Enantiomeric ratio**: 92:8, determined by HPLC (Daicel Chirapak AD, isopropanol / hexane = 10/90, flow rate = 1.0 mL/min, T = 30 °C, λ = 254 nm): t<sub>R</sub> = 10.47 min (minor), t<sub>R</sub> = 19.04 min (major).

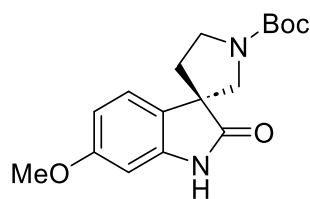

**2j**

**tert-Butyl (R)-6-methoxy-2-oxospiro[indoline-3,3'-pyrrolidine]-1'-carboxylate 2j**: yield: 60% (19.1 mg); flash column chromatography eluent, petroleum ether/ethyl acetate = 2/1; colorless oil;  $[\alpha]_D^{20} = -12.5$  (c 0.15 CH<sub>2</sub>Cl<sub>2</sub>); <sup>1</sup>H NMR (600 MHz, CDCl<sub>3</sub>) δ 8.75/8.65 (s, 1H), 7.10 – 7.02 (m, 1H), 6.58 – 6.50 (m, 2H), 3.90 – 3.81 (m, 1H), 3.79 (s, 3H), 3.75 – 3.65 (m, 2H), 3.60 – 3.49 (m, 1H), 2.42 – 2.32 (m, 1H), 2.08 – 2.00 (m, 1H), 1.50/1.45 (s, 9H); <sup>13</sup>C NMR (151 MHz, CDCl<sub>3</sub>) δ 180.5, 160.4, 154.6, 141.3, 125.1, 107.6, 97.6, 80.0, 55.7, 54.1, 53.0, 52.1, 45.6, 36.6, 29.8; HRMS (ESI) calculated for C<sub>17</sub>H<sub>22</sub>N<sub>2</sub>NaO<sub>4</sub> [M+Na]<sup>+</sup>: 341.1477, found: 341.1481; **Enantiomeric ratio**: 80:20, determined by HPLC (Daicel Chirapak AD, isopropanol / hexane = 10/90, flow rate = 1.0 mL/min, T = 30 °C, λ = 254 nm): t<sub>R</sub> = 13.42 min (minor), t<sub>R</sub> = 21.21 min (major).

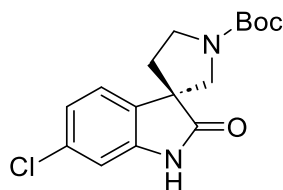

**2k**

**tert-Butyl (R)-6-chloro-2-oxospiro[indoline-3,3'-pyrrolidine]-1'-carboxylate 2k**: yield: 60% (19.4 mg); flash column chromatography eluent, petroleum ether/ethyl acetate = 2/1; colorless oil;  $[\alpha]_D^{20} = -11.0$  (c 0.14 CH<sub>2</sub>Cl<sub>2</sub>); <sup>1</sup>H NMR (600 MHz, CDCl<sub>3</sub>) δ 8.31/8.25 (s, 1H), 7.13 – 6.98 (m, 2H), 6.94 (s, 1H), 3.88 – 3.78 (m, 1H), 3.78 – 3.64 (m, 2H), 3.63 – 3.50 (m, 1H), 2.44 – 2.37 (m, 1H), 2.07 – 2.02 (m, 1H), 1.51/1.46 (s, 9H); <sup>13</sup>C NMR (151 MHz, CDCl<sub>3</sub>) δ 180.3, 154.6, 141.4, 134.3, 131.5, 123.8, 123.0, 110.9, 80.3, 54.4, 53.2, 45.2, 35.6, 28.6; HRMS (ESI) calculated for C<sub>16</sub>H<sub>19</sub>ClN<sub>2</sub>NaO<sub>3</sub> [M+Na]<sup>+</sup>: 345.0982, found: 345.0980; **Enantiomeric ratio**: 90:10, determined by HPLC (Daicel Chirapak AD, isopropanol / hexane = 10/90, flow rate = 1.0 mL/min, T = 30 °C, λ = 254 nm): t<sub>R</sub> = 9.97 min (minor), t<sub>R</sub> = 21.17 min (major).

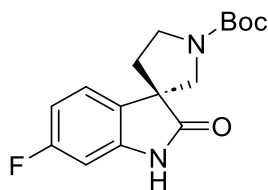

**2l**

**tert-Butyl (R)-6-fluoro-2-oxospiro[indoline-3,3'-pyrrolidine]-1'-carboxylate 2l:** yield: 62% (19.0 mg); flash column chromatography eluent, petroleum ether/ethyl acetate = 2/1; colorless oil;  $[\alpha]_D^{20} = -14.8$  (c 0.19 CH<sub>2</sub>Cl<sub>2</sub>); **<sup>1</sup>H NMR** (600 MHz, CDCl<sub>3</sub>) δ 8.44/8.37 (s, 1H), 7.15 – 7.06 (m, 1H), 6.79 – 6.57 (m, 2H), 3.88 – 3.78 (m, 1H), 3.77 – 3.64 (m, 2H), 3.62 – 3.51 (m, 1H), 2.45 – 2.36 (m, 1H), 2.07 – 2.01 (m, 1H), 1.51/1.46 (s, 9H); **<sup>13</sup>C NMR** (151 MHz, CDCl<sub>3</sub>) δ 180.7, 163.0 (d, *J* = 245.6 Hz), 154.6, 141.7, 128.3 (d, *J* = 72.7 Hz), 123.9, 109.3 (d, *J* = 22.6 Hz), 98.9 (d, *J* = 27.1 Hz), 80.2, 54.5, 52.2, 45.2, 35.7, 28.6; **<sup>19</sup>F NMR** (376 MHz, CDCl<sub>3</sub>) δ -111.68 ppm; **HRMS (ESI)** calculated for C<sub>16</sub>H<sub>19</sub>FN<sub>2</sub>NaO<sub>3</sub> [M+Na]<sup>+</sup>: 329.1277, found: 329.1280; **Enantiomeric ratio:** 89:11, determined by HPLC (Daicel Chirapak AD, isopropanol / hexane = 10/90, flow rate = 1.0 mL/min, T = 30 °C, λ = 254 nm): t<sub>R</sub> = 8.92 min (minor), t<sub>R</sub> = 19.49 min (major)

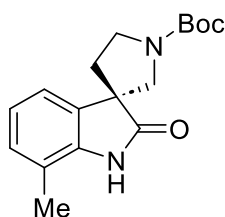

**2m**

**tert-Butyl (R)-7-methyl-2-oxospiro[indoline-3,3'-pyrrolidine]-1'-carboxylate 2m:** yield: 60% (18.1 mg); flash column chromatography eluent, petroleum ether/ethyl acetate = 2/1; colorless oil;  $[\alpha]_D^{20} = -9.3$  (c 0.13 CH<sub>2</sub>Cl<sub>2</sub>); **<sup>1</sup>H NMR** (600 MHz, CDCl<sub>3</sub>) δ 8.59/8.53 (s, 1H), 7.10 – 6.94 (m, 3H), 3.87 – 3.75 (m, 2H), 3.73 – 3.66 (m, 1H), 3.64 – 3.53 (m, 1H), 2.45 – 2.38 (m, 1H), 2.29 (s, 3H), 2.13 – 2.05 (m, 1H), 1.51/1.45 (s, 9H); **<sup>13</sup>C NMR** (151 MHz, CDCl<sub>3</sub>) δ 180.8, 154.6, 139.0, 132.8, 129.8, 123.1, 120.2, 119.7, 80.0, 54.6, 54.0, 45.6, 36.6, 28.7, 16.6; **HRMS (ESI)** calculated for C<sub>17</sub>H<sub>22</sub>N<sub>2</sub>NaO<sub>3</sub> [M+Na]<sup>+</sup>: 325.1528, found: 325.1533; **Enantiomeric ratio:** 92:8, determined by HPLC (Daicel Chirapak AD, isopropanol / hexane = 10/90, flow rate = 1.0 mL/min, T = 30 °C, λ = 254 nm): t<sub>R</sub> = 6.78 min (minor), t<sub>R</sub> = 7.27 min (major).

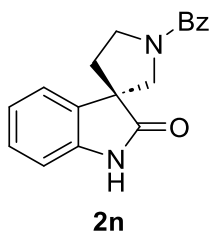

**(R)-1'-Benzoylspiro[indoline-3,3'-pyrrolidin]-2-one 2n**: yield: 58% (17.0 mg); flash column chromatography eluent, petroleum ether/ethyl acetate = 2/1; colorless oil;  $[\alpha]_{\text{D}}^{20} = -5.6$  (c 0.06  $\text{CH}_2\text{Cl}_2$ );  $^1\text{H NMR}$  (600 MHz,  $\text{CDCl}_3$ )  $\delta$  9.18 (s, 1H), 7.81 – 7.78 (m, 1H), 7.67 – 7.63 (m, 2H), 7.49 – 7.45 (m, 1H), 7.42 – 7.37 (m, 4H), 7.18 – 7.14 (m, 1H), 3.81 (q,  $J = 6.5$  Hz, 2H), 3.45 (t,  $J = 6.8$  Hz, 2H), 2.10 (s, 1H), 2.04 (s, 1H);  $^{13}\text{C NMR}$  (151 MHz,  $\text{CDCl}_3$ )  $\delta$  180.8, 168.0, 137.7, 134.4, 132.9, 131.7, 130.1, 128.7, 127.9, 127.0, 121.6, 112.7, 46.2, 41.6, 29.8, 24.0; **HRMS (ESI)** calculated for  $\text{C}_{18}\text{H}_{16}\text{N}_2\text{NaO}_2$   $[\text{M}+\text{Na}]^+$ : 315.1109, found: 315.1112; **Enantiomeric ratio**: 86:14, determined by HPLC (Daicel Chirapak OD, isopropanol / hexane = 10/90, flow rate = 1.0 mL/min,  $T = 30$  °C,  $\lambda = 254$  nm):  $t_{\text{R}} = 23.62$  min (minor),  $t_{\text{R}} = 28.59$  min (major).

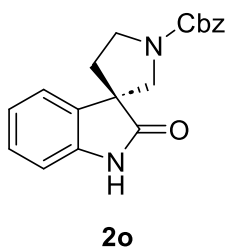

**Benzyl (R)-2-oxospiro[indoline-3,3'-pyrrolidine]-1'-carboxylate 2o**: yield: 63% (20.3 mg); flash column chromatography eluent, petroleum ether/ethyl acetate = 2/1; colorless oil;  $[\alpha]_{\text{D}}^{20} = -11.6$  (c 0.17  $\text{CH}_2\text{Cl}_2$ );  $^1\text{H NMR}$  (600 MHz,  $\text{CDCl}_3$ )  $\delta$  8.98/8.94 (s, 1H), 7.44 – 7.40 (m, 1H), 7.40 – 7.37 (m, 1H), 7.35 – 7.27 (m, 3H), 7.25 – 7.21 (m, 1H), 7.17 – 7.12 (m, 1H), 7.06 – 7.00 (m, 1H), 6.96 – 6.92 (m, 1H), 5.21 – 5.15 (m, 2H), 3.95 – 3.89 (m, 1H), 3.85 – 3.79 (m, 2H), 3.71 – 3.63 (m, 1H), 2.47 – 2.41 (m, 1H), 2.15 – 2.10 (m, 1H);  $^{13}\text{C NMR}$  (151 MHz,  $\text{CDCl}_3$ )  $\delta$  180.3, 178.2, 154.9, 140.3, 136.8, 132.7, 128.6, 128.1, 127.9, 123.1, 122.8, 110.3, 67.2, 60.6, 54.1, 53.4, 45.9, 36.4, 29.7; **HRMS (ESI)** calculated for  $\text{C}_{19}\text{H}_{18}\text{N}_2\text{NaO}_3$   $[\text{M}+\text{Na}]^+$ : 345.1215, found: 345.1218; **Enantiomeric ratio**: 90:10, determined by HPLC (Daicel Chirapak OD, isopropanol / hexane = 10/90, flow rate = 1.0 mL/min,  $T = 30$  °C,  $\lambda = 254$  nm):  $t_{\text{R}} = 15.42$  min (minor),  $t_{\text{R}} = 21.02$  min (major).

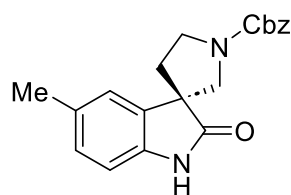

**2p**

**Benzyl (*R*)-5-methyl-2-oxospiro[indoline-3,3'-pyrrolidine]-1'-carboxylate 2p:** yield: 52% (17.5 mg); flash column chromatography eluent, petroleum ether/ethyl acetate = 2/1; colorless oil;  $[\alpha]_D^{20} = -15.9$  (c 0.28 CH<sub>2</sub>Cl<sub>2</sub>);  $^1\text{H NMR}$  (600 MHz, CDCl<sub>3</sub>)  $\delta$  8.88/8.83 (s, 1H), 7.50 – 7.37 (m, 2H), 7.37 – 7.25 (m, 3H), 7.03 (d,  $J = 7.9$  Hz, 1H), 6.99 – 6.92 (m, 1H), 6.85 – 6.79 (m, 1H), 5.26 – 5.16 (m, 2H), 3.97 – 3.90 (m, 1H), 3.86 – 3.78 (m, 2H), 3.71 – 3.62 (m, 1H), 2.45 – 2.40 (m, 1H), 2.30 (s, 3H), 2.12 – 2.07 (m, 1H);  $^{13}\text{C NMR}$  (151 MHz, CDCl<sub>3</sub>)  $\delta$  180.1, 178.1, 154.9, 137.7, 136.7, 132.9, 132.6, 128.9, 128.6, 128.1, 127.9, 123.6, 110.0, 67.2, 54.5, 53.5, 45.9, 36.4, 29.7, 21.2; **HRMS (ESI)** calculated for C<sub>20</sub>H<sub>20</sub>N<sub>2</sub>NaO<sub>3</sub> [M+Na]<sup>+</sup>: 359.1372, found: 359.1375; **Enantiomeric ratio:** 90:10, determined by HPLC (Daicel Chirapak OD, isopropanol / hexane = 10/90, flow rate = 1.0 mL/min, T = 30 °C,  $\lambda = 254$  nm):  $t_R = 13.44$  min (minor),  $t_R = 18.55$  min (major).

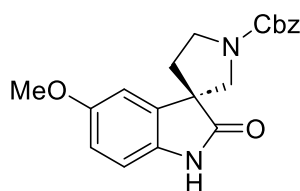

**2q**

**Benzyl (*R*)-5-methoxy-2-oxospiro[indoline-3,3'-pyrrolidine]-1'-carboxylate 2q:** yield: 68% (24.0 mg); flash column chromatography eluent, petroleum ether/ethyl acetate = 2/1; colorless oil;  $[\alpha]_D^{20} = -32.4$  (c 0.24 CH<sub>2</sub>Cl<sub>2</sub>);  $^1\text{H NMR}$  (600 MHz, CDCl<sub>3</sub>)  $\delta$  8.45/8.42 (s, 1H), 7.48 – 7.18 (m, 5H), 6.87 – 6.80 (m, 1H), 6.79 – 6.69 (m, 2H), 5.23 – 5.11 (m, 2H), 3.91 (m, 1H), 3.87 – 3.77 (m, 2H), 3.75 (s, 3H), 3.70 – 3.62 (m, 1H), 2.47 – 2.39 (m, 1H), 2.13 – 2.06 (m, 1H);  $^{13}\text{C NMR}$  (151 MHz, CDCl<sub>3</sub>)  $\delta$  179.8, 156.4, 154.9, 136.9, 136.7, 134.0, 133.4, 128.7, 128.1, 127.9, 112.8, 110.6, 110.2, 67.2, 55.9, 54.2, 53.6, 45.4, 36.5, 29.8; **HRMS (ESI)** calculated for C<sub>20</sub>H<sub>20</sub>N<sub>2</sub>NaO<sub>4</sub> [M+Na]<sup>+</sup>: 375.1321, found: 375.1324; **Enantiomeric ratio:** 89.5:10.5, determined by HPLC (Daicel Chirapak OD, isopropanol / hexane = 10/90, flow rate = 1.0 mL/min, T = 30 °C,  $\lambda = 254$  nm):  $t_R = 18.67$  min (minor),  $t_R = 27.89$  min (major).

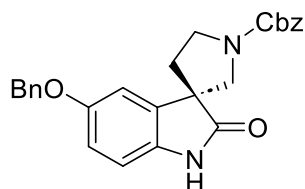

**2r**

**Benzyl (R)-5-(benzyloxy)-2-oxospiro[indoline-3,3'-pyrrolidine]-1'-carboxylate 2r:** yield: 62% (26.6 mg); flash column chromatography eluent, petroleum ether/ethyl acetate = 2/1; colorless oil;  $[\alpha]_D^{20} = -17.6$  (c 0.14 CH<sub>2</sub>Cl<sub>2</sub>); **<sup>1</sup>H NMR** (600 MHz, CDCl<sub>3</sub>) δ 8.63/8.58 (s, 1H), 7.38 – 7.30 (m, 5H), 7.29 (s, 1H), 7.28 – 7.27 (m, 1H), 7.26 – 7.17 (m, 3H), 6.80 – 6.69 (m, 3H), 5.14 – 5.06 (m, 2H), 4.92 (s, 2H), 3.90 – 3.77 (m, 1H), 3.77 – 3.65 (m, 2H), 3.63 – 3.54 (m, 1H), 2.40 – 2.31 (m, 1H), 2.05 – 1.95 (m, 1H); **<sup>13</sup>C NMR** (151 MHz, CDCl<sub>3</sub>) δ 179.8, 177.7, 155.5, 154.8, 136.9, 134.1, 133.9, 133.6, 128.8, 128.6, 128.2, 127.9, 127.7, 114.1, 111.4, 110.5, 71.0, 67.2, 54.5, 45.8, 35.6, 29.7; **HRMS (ESI)** calculated for C<sub>26</sub>H<sub>24</sub>N<sub>2</sub>NaO<sub>4</sub> [M+Na]<sup>+</sup>: 451.1634, found: 451.1634; **Enantiomeric ratio:** 83.5:16.5, determined by HPLC (Daicel Chirapak OD, isopropanol / hexane = 20/80, flow rate = 1.0 mL/min, T = 30 °C, λ = 254 nm): t<sub>R</sub> = 12.93 min (minor), t<sub>R</sub> = 17.19 min (major).

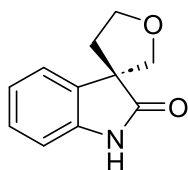

**2s**

**(R)-4,5-Dihydro-2H-spiro[furan-3,3'-indolin]-2'-one 2s:** yield: 65% (12.3 mg); flash column chromatography eluent, petroleum ether/ethyl acetate = 2/1; colorless oil;  $[\alpha]_D^{20} = +14.0$  (c 0.10 CH<sub>2</sub>Cl<sub>2</sub>); **<sup>1</sup>H NMR** (600 MHz, CDCl<sub>3</sub>) δ 8.83 (s, 1H), 7.29 (d, *J* = 7.4 Hz, 1H), 7.23 (t, *J* = 7.7 Hz, 1H), 7.06 (t, *J* = 7.5 Hz, 1H), 6.94 (d, *J* = 7.7 Hz, 1H), 4.25 – 4.19 (m, 2H), 4.08 (d, *J* = 8.6 Hz, 1H), 3.96 (d, *J* = 8.5 Hz, 1H), 2.58 – 2.52 (m, 1H), 2.22 – 2.16 (m, 1H); **<sup>13</sup>C NMR** (151 MHz, CDCl<sub>3</sub>) δ 181.5, 140.4, 134.2, 128.3, 123.1, 123.0, 110.1, 69.2, 54.9, 38.8; **HRMS (ESI)** calculated for C<sub>11</sub>H<sub>12</sub>NO<sub>2</sub> [M+H]<sup>+</sup>: 190.0868, found: 190.0872; **Enantiomeric ratio:** 92.5:7.5, determined by HPLC (Daicel Chirapak AS, isopropanol / hexane = 40/60, flow rate = 1.0 mL/min, T = 30 °C, λ = 254 nm): t<sub>R</sub> = 38.85 min (minor), t<sub>R</sub> = 52.37 min (major).

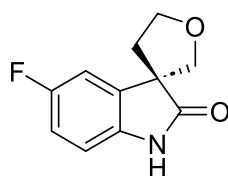

**2t**

**(R)-5'-Fluoro-4,5-dihydro-2H-spiro[furan-3,3'-indolin]-2'-one 2t:** yield: 62% (12.8 mg); flash column chromatography eluent, petroleum ether/ethyl acetate = 2/1; colorless oil;  $[\alpha]_D^{20} = +16.6$  (c 0.18 CH<sub>2</sub>Cl<sub>2</sub>); <sup>1</sup>H NMR (600 MHz, CDCl<sub>3</sub>) δ 9.38 (s, 1H), 7.04 – 7.00 (m, 1H), 6.95 – 6.90 (m, 1H), 6.90 – 6.86 (m, 1H), 4.24 – 4.18 (m, 2H), 4.05 (d, *J* = 8.6 Hz, 1H), 3.95 (d, *J* = 8.6 Hz, 1H), 2.59 – 2.52 (m, 1H), 2.21 – 2.15 (m, 1H); <sup>13</sup>C NMR (151 MHz, CDCl<sub>3</sub>) δ 181.3, 159.6 (d, *J* = 241.1 Hz), 136.2, 135.9 (d, *J* = 8.0 Hz), 114.6 (d, *J* = 23.7 Hz), 111.1 (d, *J* = 25.0 Hz), 110.7 (d, *J* = 8.1 Hz), 69.08, 55.50, 38.65; <sup>19</sup>F NMR (565 MHz, CDCl<sub>3</sub>) δ -119.66 ppm; **HRMS (ESI)** calculated for C<sub>11</sub>H<sub>11</sub>FNO<sub>2</sub> [M+H]<sup>+</sup>: 208.0774, found: 208.0777; **Enantiomeric ratio:** 90:10, determined by HPLC (Daicel Chirapak OJ, isopropanol / hexane = 20/80, flow rate = 1.0 mL/min, T = 30 °C, λ = 254 nm): t<sub>R</sub> = 6.52 min (major), t<sub>R</sub> = 7.78 min (minor).

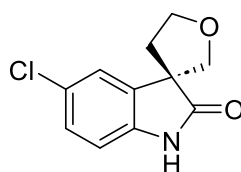

**2u**

**(R)-5'-Chloro-4,5-dihydro-2H-spiro[furan-3,3'-indolin]-2'-one 2u:** yield: 60% (13.4 mg); flash column chromatography eluent, petroleum ether/ethyl acetate = 2/1; colorless oil;  $[\alpha]_D^{20} = +26.7$  (c 0.08 CH<sub>2</sub>Cl<sub>2</sub>); <sup>1</sup>H NMR (600 MHz, CDCl<sub>3</sub>) δ 9.17 (s, 1H), 7.28 – 7.26 (m, 1H), 7.23 – 7.18 (m, 1H), 6.88 (d, *J* = 8.3 Hz, 1H), 4.25 – 4.16 (m, 2H), 4.04 (d, *J* = 8.6 Hz, 1H), 3.95 (d, *J* = 8.6 Hz, 1H), 2.59 – 2.53 (m, 1H), 2.20 – 2.15 (m, 1H); <sup>13</sup>C NMR (151 MHz, CDCl<sub>3</sub>) δ 180.9, 138.8, 136.0, 132.2, 128.2, 123.6, 111.1, 69.1, 55.2, 38.7; **HRMS (ESI)** calculated for C<sub>11</sub>H<sub>11</sub>ClNO<sub>2</sub> [M+H]<sup>+</sup>: 224.0478, found: 224.0482; **Enantiomeric ratio:** 87:13, determined by HPLC (Daicel Chirapak OJ, isopropanol / hexane = 10/90, flow rate = 1.0 mL/min, T = 30 °C, λ = 254 nm): t<sub>R</sub> = 9.77 min (major), t<sub>R</sub> = 12.77 min (minor).

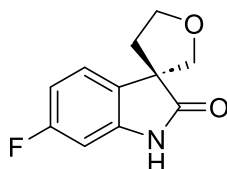

**2v**

**(R)-6'-Fluoro-4,5-dihydro-2H-spiro[furan-3,3'-indolin]-2'-one 2v:** yield: 60% (12.6 mg); flash column chromatography eluent, petroleum ether/ethyl acetate = 2/1; colorless oil;  $[\alpha]_D^{20} = +12.6$  (c 0.09 CH<sub>2</sub>Cl<sub>2</sub>); <sup>1</sup>H NMR (600 MHz, CDCl<sub>3</sub>) δ 9.38 (s, 1H), 7.23 – 7.18 (m, 1H), 6.76 – 6.69 (m, 2H), 4.23 – 4.18 (m, 2H), 4.05 (d, *J* = 8.6 Hz, 1H), 3.93 (d, *J* = 8.6 Hz, 1H), 2.57 – 2.51 (m, 1H), 2.19 – 2.13 (m, 1H); <sup>13</sup>C NMR (151 MHz, CDCl<sub>3</sub>) δ 181.9, 162.9 (d, *J* = 245.2 Hz), 141.7 (d, *J* = 11.8 Hz), 129.5 (d, *J* = 3.1 Hz), 124.0 (d, *J* = 9.6 Hz), 109.4 (d, *J* = 22.5 Hz), 98.9 (d, *J* = 27.4 Hz), 69.1, 54.5, 38.7; <sup>19</sup>F NMR (565 MHz, CDCl<sub>3</sub>) δ -112.18 ppm; **HRMS (ESI)** calculated for C<sub>11</sub>H<sub>11</sub>FNO<sub>2</sub> [M+H]<sup>+</sup>: 208.0774, found: 208.0773; **Enantiomeric ratio:** 82:18, determined by HPLC (Daicel Chirapak OJ, isopropanol / hexane = 10/90, flow rate = 1.0 mL/min, T = 30 °C, λ = 254 nm): t<sub>R</sub> = 10.72 min (major), t<sub>R</sub> = 12.23 min (minor).

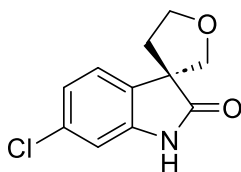

**2w**

**(R)-6'-Chloro-4,5-dihydro-2H-spiro[furan-3,3'-indolin]-2'-one 2w:** yield: 65% (14.5 mg); flash column chromatography eluent, petroleum ether/ethyl acetate = 2/1; colorless oil;  $[\alpha]_D^{20} = +11.8$  (c 0.10 CH<sub>2</sub>Cl<sub>2</sub>); <sup>1</sup>H NMR (600 MHz, CDCl<sub>3</sub>) δ 9.48 (s, 1H), 7.19 (d, *J* = 8.0 Hz, 1H), 7.05 – 7.01 (m, 1H), 6.99 – 6.95 (m, 1H), 4.23 – 4.19 (m, 2H), 4.04 (d, *J* = 8.6 Hz, 1H), 3.93 (d, *J* = 8.6 Hz, 1H), 2.57 – 2.51 (m, 1H), 2.19 – 2.13 (m, 1H); <sup>13</sup>C NMR (151 MHz, CDCl<sub>3</sub>) δ 181.5, 141.5, 134.0, 132.6, 123.9, 123.1, 110.8, 77.0, 69.1, 54.7, 38.7; **HRMS (ESI)** calculated for C<sub>11</sub>H<sub>11</sub>ClNO<sub>2</sub> [M+H]<sup>+</sup>: 224.0478, found: 224.0482; **Enantiomeric ratio:** 85:15, determined by HPLC (Daicel Chirapak OJ, isopropanol / hexane = 10/90, flow rate = 1.0 mL/min, T = 30 °C, λ = 254 nm): t<sub>R</sub> = 12.24 min (major), t<sub>R</sub> = 14.97 min (minor).

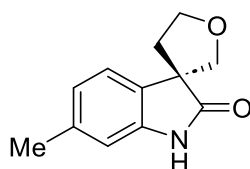

**2x**

**(R)-6'-Methyl-4,5-dihydro-2H-spiro[furan-3,3'-indolin]-2'-one 2x:** yield: 60% (12.2 mg); flash column chromatography eluent, petroleum ether/ethyl acetate = 2/1; colorless oil;  $[\alpha]_D^{20} = +3.2$  (c 0.18 CH<sub>2</sub>Cl<sub>2</sub>); **<sup>1</sup>H NMR** (600 MHz, CDCl<sub>3</sub>)  $\delta$  7.92 (s, 1H), 7.16 (d,  $J = 7.6$  Hz, 1H), 6.87 (d,  $J = 7.6$  Hz, 1H), 6.74 (s, 1H), 4.22 – 4.18 (m, 2H), 4.05 (d,  $J = 8.5$  Hz, 1H), 3.93 (d,  $J = 8.5$  Hz, 1H), 2.55 – 2.50 (m, 1H), 2.35 (s, 3H), 2.18 – 2.13 (m, 1H); **<sup>13</sup>C NMR** (151 MHz, CDCl<sub>3</sub>)  $\delta$  181.9, 140.5, 138.5, 131.2, 123.6, 122.7, 111.0, 69.2, 54.7, 38.8, 21.7; **HRMS (ESI)** calculated for C<sub>12</sub>H<sub>14</sub>NO<sub>2</sub> [M+H]<sup>+</sup>: 204.1025, found: 204.1027; **Enantiomeric ratio:** 86.5:13.5, determined by HPLC (Daicel Chirapak AD, isopropanol / hexane = 10/90, flow rate = 1.0 mL/min, T = 30 °C,  $\lambda = 254$  nm):  $t_R = 9.69$  min (minor),  $t_R = 10.32$  min (major).

## 5. Synthetic Applications and Mechanistic Experiments

### 5.1 Gram-scale reaction and the synthesis of (-)-Coerulescine

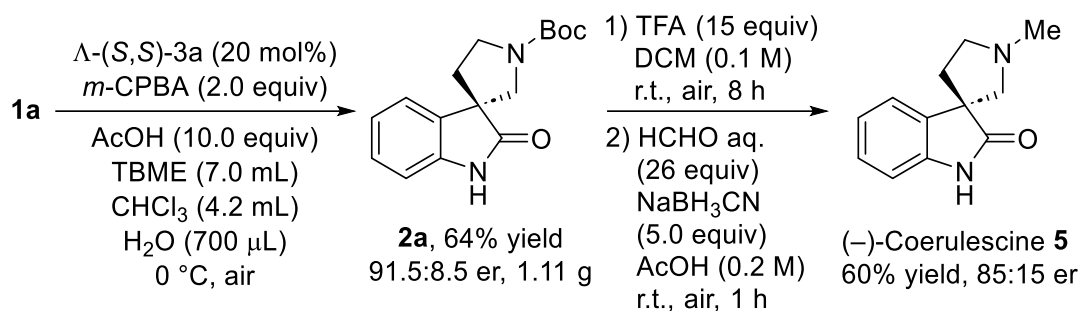

In a 50 mL tube equipped with a magnetic stirring bar, indole **1a** (6.0 mmol, 1.0 equiv),  $\Delta$ -(*S,S*)-**3a** (960 mg, 20 mol%), H<sub>2</sub>O (700  $\mu$ L), AcOH (60 mmol, 10.0 equiv), and a mixed solvent of TBME/CHCl<sub>3</sub> (11.2 mL, v/v = 5:3) were combined. The resulting mixture was cooled to 0 °C and stirred for 20 min, followed by the addition of *m*-CPBA (2.42 g, 12 mmol, 2.0 equiv). The reaction mixture was stirred at the same temperature, and the reaction progress was monitored by TLC. Upon completion, the reaction was quenched by the addition of saturated aqueous Na<sub>2</sub>S<sub>2</sub>O<sub>3</sub> solution. The mixture was extracted with ethyl acetate (3  $\times$  15 mL). The combined organic layers were washed with saturated aqueous NaHCO<sub>3</sub> solution and brine, dried over anhydrous Na<sub>2</sub>SO<sub>4</sub>, filtered, and concentrated under reduced pressure. Purification of the residue by silica gel column chromatography afforded the pure product **2a** in 64% yield (1.11 g, 91.5:8.5 er).

To a solution of **2a** (57.6 mg, 0.20 mmol, 1.0 equiv) in anhydrous DCM (0.1 M) was added TFA (0.2 mL, 15 equiv). The reaction mixture was stirred at room temperature for 8 h, then diluted with DCM (5 mL) and H<sub>2</sub>O (1 mL). The mixture was basified to pH 9–10 with 2 N aqueous NaOH and extracted with DCM. The combined organic layers were washed with brine, dried over anhydrous Na<sub>2</sub>SO<sub>4</sub>, and concentrated to afford the crude amine. The crude amine was dissolved in AcOH (0.2 M), and aqueous formaldehyde solution (37 wt%, 0.40 mL) and NaBH<sub>3</sub>CN (63 mg, 5.0 equiv, 1.0 mmol) were added sequentially. The resulting mixture was stirred at room temperature for 1 h, then diluted with ethyl acetate (2 mL) and basified to pH 9–10 with 2 N aqueous NaOH. The mixture was extracted with ethyl acetate, and the combined organic layers were washed with brine, dried over anhydrous Na<sub>2</sub>SO<sub>4</sub>, and concentrated. Purification of the residue by preparative TLC (eluent: DCM/MeOH = 9:1) afforded (-)-Coerulescine **5** as a colorless wax in 60% overall yield (24.2 mg, 85:15 er).

(-)-**Coerulescine 5**: yield: 60% (24.2 mg); flash column chromatography eluent, DCM/MeOH = 9/1; colorless oil;  $[\alpha]_D^{20} = +12.6$  (c 0.1 CH<sub>2</sub>Cl<sub>2</sub>); <sup>1</sup>H NMR (400 MHz, CDCl<sub>3</sub>) δ 8.29 (s, 1H), 7.40 (d, *J* = 7.4 Hz, 1H), 7.23 – 7.14 (m, 1H), 7.08 – 7.01 (m, 1H), 6.88 (d, *J* = 7.7 Hz, 1H), 3.05 – 2.99 (m, 1H), 2.91 – 2.84 (m, 2H), 2.83 – 2.76 (m, 1H), 2.46 (s, 3H), 2.44 – 2.36 (m, 1H), 2.14 – 2.08 (m, 1H); <sup>13</sup>C NMR (101 MHz, CDCl<sub>3</sub>) δ 182.8, 140.2, 136.2, 127.9, 123.5, 123.0, 109.6, 66.5, 56.9, 53.8, 42.0, 38.1; HRMS (ESI) calculated for C<sub>12</sub>H<sub>15</sub>N<sub>2</sub>O [M+H]<sup>+</sup>: 203.1184, found: 203.1189; **Enantiomeric ratio**: 85:15, determined by HPLC (Daicel Chirapak AS, isopropanol / hexane = 30/70, flow rate = 1.0 mL/min, T = 30 °C, λ = 254 nm): t<sub>R</sub> = 8.96 min (major), t<sub>R</sub> = 14.01 min (minor).

## 5.2 Synthesis of seven-membered ring substrates **2y**

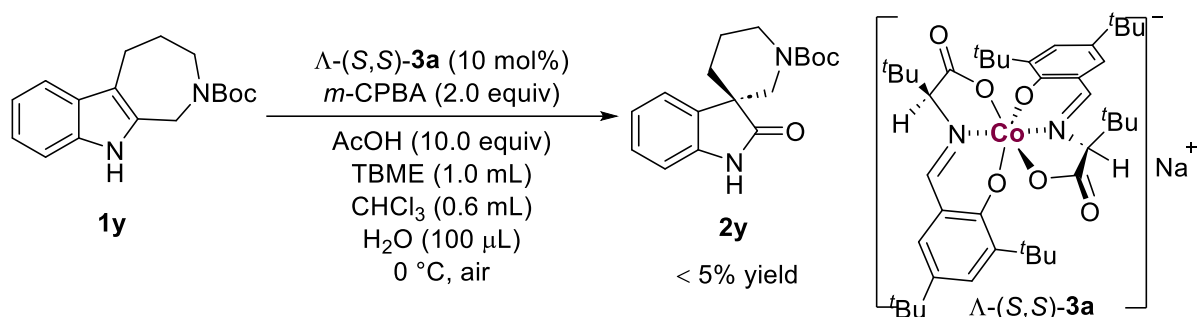

At room temperature, a 10 mL vial was charged with  $\Delta$ -(*S,S*)-**3a** (16 mg, 20 mol%), H<sub>2</sub>O (100  $\mu$ L), AcOH (60  $\mu$ L), and indole **1y** (0.10 mmol), after which a mixed solvent of TBME/CHCl<sub>3</sub> (1.6 mL, v/v = 5:3) was added. The resulting mixture was cooled to 0 °C and stirred for 20 min, followed by the addition of *m*-CPBA (34.5 mg, 2.0 equiv, 0.20 mmol). The reaction mixture was stirred at 0 °C, and the progress of the reaction was monitored by TLC. Unfortunately, according to TLC monitoring, only a trace amount of the desired product was observed, corresponding to a yield of less than 5%.

### 5.3 Non-Linear Effects

The standard reaction of **1a** showed a linear correlation between the enantiomeric excess (ee) of the product and that of the catalyst, which is consistent with the proposed enantiodetermining transition state involving a single catalyst molecule acting in a bifunctional manner.

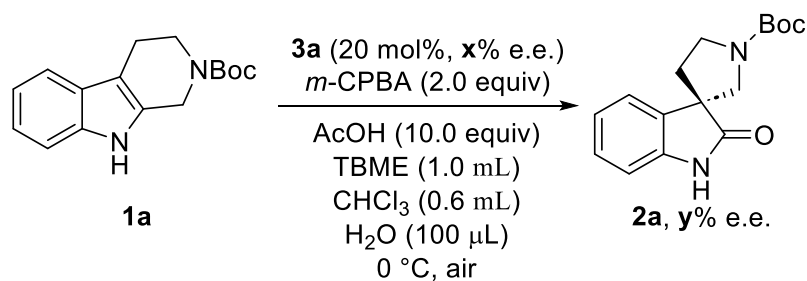

| entry | $\Delta$ - <b>3a</b> (mg) | $\Lambda$ - <b>3a</b> (mg) | ee of <b>3a</b> (%) | yield of <b>2a</b> (%) | ee of <b>2a</b> (%) |
|-------|---------------------------|----------------------------|---------------------|------------------------|---------------------|
| 1     | 2.5                       | 47.5                       | 90                  | 62                     | 76                  |
| 2     | 5.0                       | 45.0                       | 80                  | 60                     | 67                  |
| 3     | 7.5                       | 42.5                       | 70                  | 60                     | 57                  |
| 4     | 10.0                      | 40.0                       | 60                  | 62                     | 49                  |
| 5     | 12.5                      | 37.5                       | 50                  | 64                     | 42                  |
| 6     | 15.0                      | 35.0                       | 40                  | 60                     | 31                  |
| 7     | 17.5                      | 32.5                       | 30                  | 58                     | 23                  |
| 8     | 20.0                      | 30.0                       | 20                  | 60                     | 15                  |
| 9     | 22.5                      | 27.5                       | 10                  | 60                     | 7                   |
| 10    | 25                        | 25                         | 0                   | 62                     | 0                   |
| 11    | --                        | 50                         | 100                 | 62                     | 89                  |
| 12    | 50                        | --                         | --                  | 60                     | 89                  |

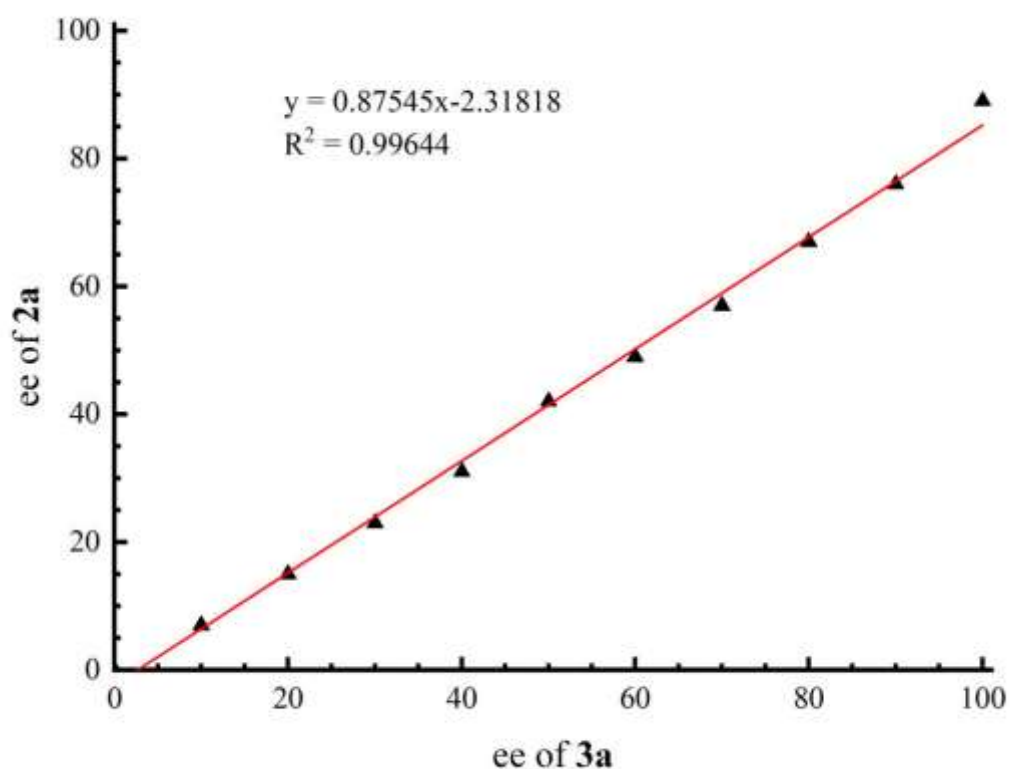

At room temperature, a 10 mL vial was charged with scalemic catalyst **3a** (16 mg, 20 mol%), H<sub>2</sub>O (100  $\mu$ L), AcOH (60  $\mu$ L), and indole **1** (0.10 mmol), after which a mixed solvent of TBME/CHCl<sub>3</sub> (1.6 mL, v/v = 5:3) was added. The resulting mixture was cooled to 0 °C and stirred for 20 min, followed by the addition of *m*-CPBA (34.5 mg, 2.0 equiv, 0.20 mmol). The reaction mixture was stirred at 0 °C, and the reaction progress was monitored by TLC. Upon completion, the reaction was quenched by the addition of saturated aqueous Na<sub>2</sub>S<sub>2</sub>O<sub>3</sub> solution. The mixture was extracted with ethyl acetate. The combined organic layers were washed with saturated aqueous NaHCO<sub>3</sub> solution and brine, dried over anhydrous Na<sub>2</sub>SO<sub>4</sub>, filtered, and concentrated under reduced pressure. Purification of the residue by silica gel column chromatography afforded the pure product.

#### 5.4 Isotopic labeling experiment

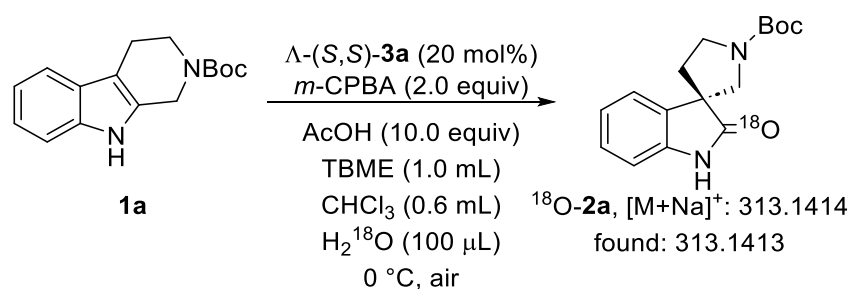

In a 10 mL tube equipped with a magnetic stirring bar, indole **1a** (0.10 mmol, 1.0 equiv),  $\Lambda$ -(*S,S*)-**3a** (16 mg, 20 mol%), H<sub>2</sub><sup>18</sup>O (100  $\mu$ L), AcOH (60  $\mu$ L, 10.0 equiv), and dry TBME (1.0 mL) were combined under a nitrogen atmosphere. The resulting mixture was cooled to 0 °C and stirred for 20 min, followed by the addition of *m*-CPBA (34.5 mg, 2.0 equiv, 0.20 mmol). The reaction mixture was stirred at the same temperature, and the reaction progress was monitored by TLC. Upon completion, the reaction was quenched by the addition of saturated aqueous Na<sub>2</sub>S<sub>2</sub>O<sub>3</sub> solution. The mixture was extracted with ethyl acetate. The combined organic layers were washed with saturated aqueous NaHCO<sub>3</sub> solution and brine, dried over anhydrous Na<sub>2</sub>SO<sub>4</sub>, filtered, and concentrated under reduced pressure. Purification of the residue by silica gel column chromatography afforded the pure product <sup>18</sup>O-**2a**.

### 5.5 Control Experiment

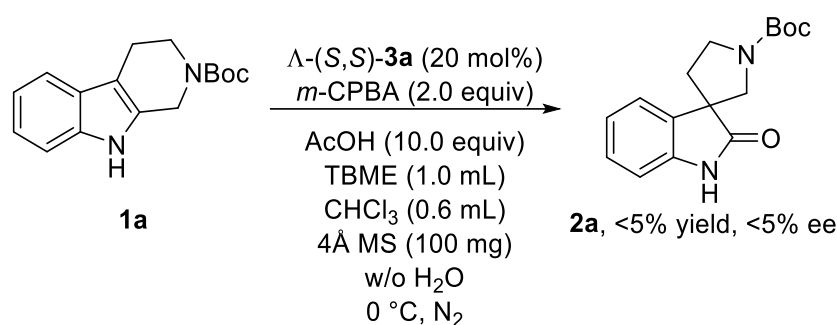

In a 10-mL tube equipped with a magnetic stirring bar was charged with indole **1a** (0.1 mmol, 1.0 equiv),  $\Lambda$ -(*S,S*)-**3a** (16 mg, 20 mol%), AcOH (60  $\mu$ L, 10.0 equiv), 4 Å MS (100 mg) and TBME/CHCl<sub>3</sub> (1.6 mL, v/v = 5:3) under the nitrogen atmosphere. The mixture was cooled to 0 °C and stirred for 20 min followed by addition of *m*-CPBA (34.5 mg, 2.0 equiv, 0.2 mmol). The mixture was stirred at the same temperature, and the reaction progress was monitored by TLC. The reaction was quenched by addition of a saturated aqueous Na<sub>2</sub>S<sub>2</sub>O<sub>3</sub> solution. Next, the mixture was extracted with ethyl acetate. The combined organic layers were washed by saturated aqueous NaHCO<sub>3</sub> solution and brine, dried over anhydrous Na<sub>2</sub>SO<sub>4</sub>, filtered, and concentrated. The residue was subjected to silica gel column chromatography to afford the pure product.

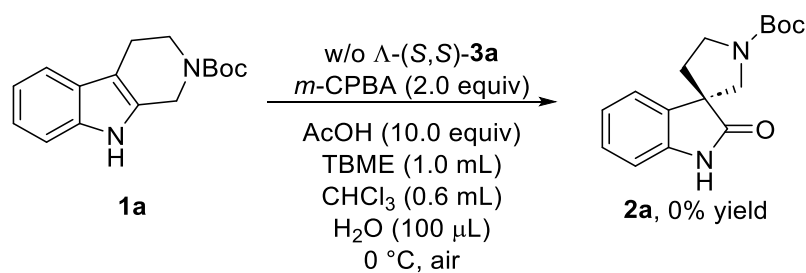

In a 10-mL tube equipped with a magnetic stirring bar was charged with indole **1a** (0.1 mmol, 1.0 equiv), AcOH (60  $\mu$ L, 10.0 equiv), and TBME/CHCl<sub>3</sub> (1.6 mL, v/v = 5:3) under the nitrogen atmosphere. The mixture was cooled to 0 °C and stirred for 20 min followed by addition of *m*-CPBA (34.5 mg, 2.0 equiv, 0.2 mmol). The mixture was stirred at the same temperature, and the reaction progress was monitored by TLC and no target product was detected.

## 6. References

- [1] (a) J. Yu, H.-J. Jiang, Y. Zhou, S.-W. Luo and L.-Z. Gong, *Angew. Chem. Int. Ed.*, 2015, **54**, 11209–11213; (b) H.-J. Jiang, K. Liu, J. Yu, L. Zhang and L.-Z. Gong, *Angew. Chem. Int. Ed.*, 2017, **56**, 11931–11935; (c) H.-J. Jiang, X.-M. Zhong, J. Yu, Y. Zhang, X. Zhang, Y.-D. Wu and L.-Z. Gong, *Angew. Chem. Int. Ed.*, 2019, **58**, 1803–1807; (d) T.-T. Sun, K. Liu, S.-X. Zhang, C.-R. Wang, C.-Z. Yao and J. Yu, *Synlett*, 2021, **32**, 701–707.
- [2] C. Qian, P. Li and J. Sun, *Angew. Chem. Int. Ed.*, 2021, **60**, 5871–5875.
- [3] H. Gao, X. Yang and L. Shi, *Org. Chem. Front.*, 2025, **12**, 3848–3855.
- [4] X. Tan, Z. Zhou, M. Shao and J. Sun, *Angew. Chem. Int. Ed.*, 2025, e202510078.
- [5] B. Jackson and J. Hester, *J. Org. Chem.*, 1970, **35**, 875–883.

## 7. NMR Spectra and HPLC Chromatograms

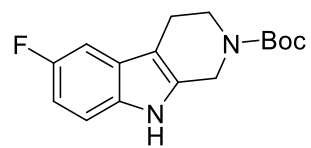

**1h**

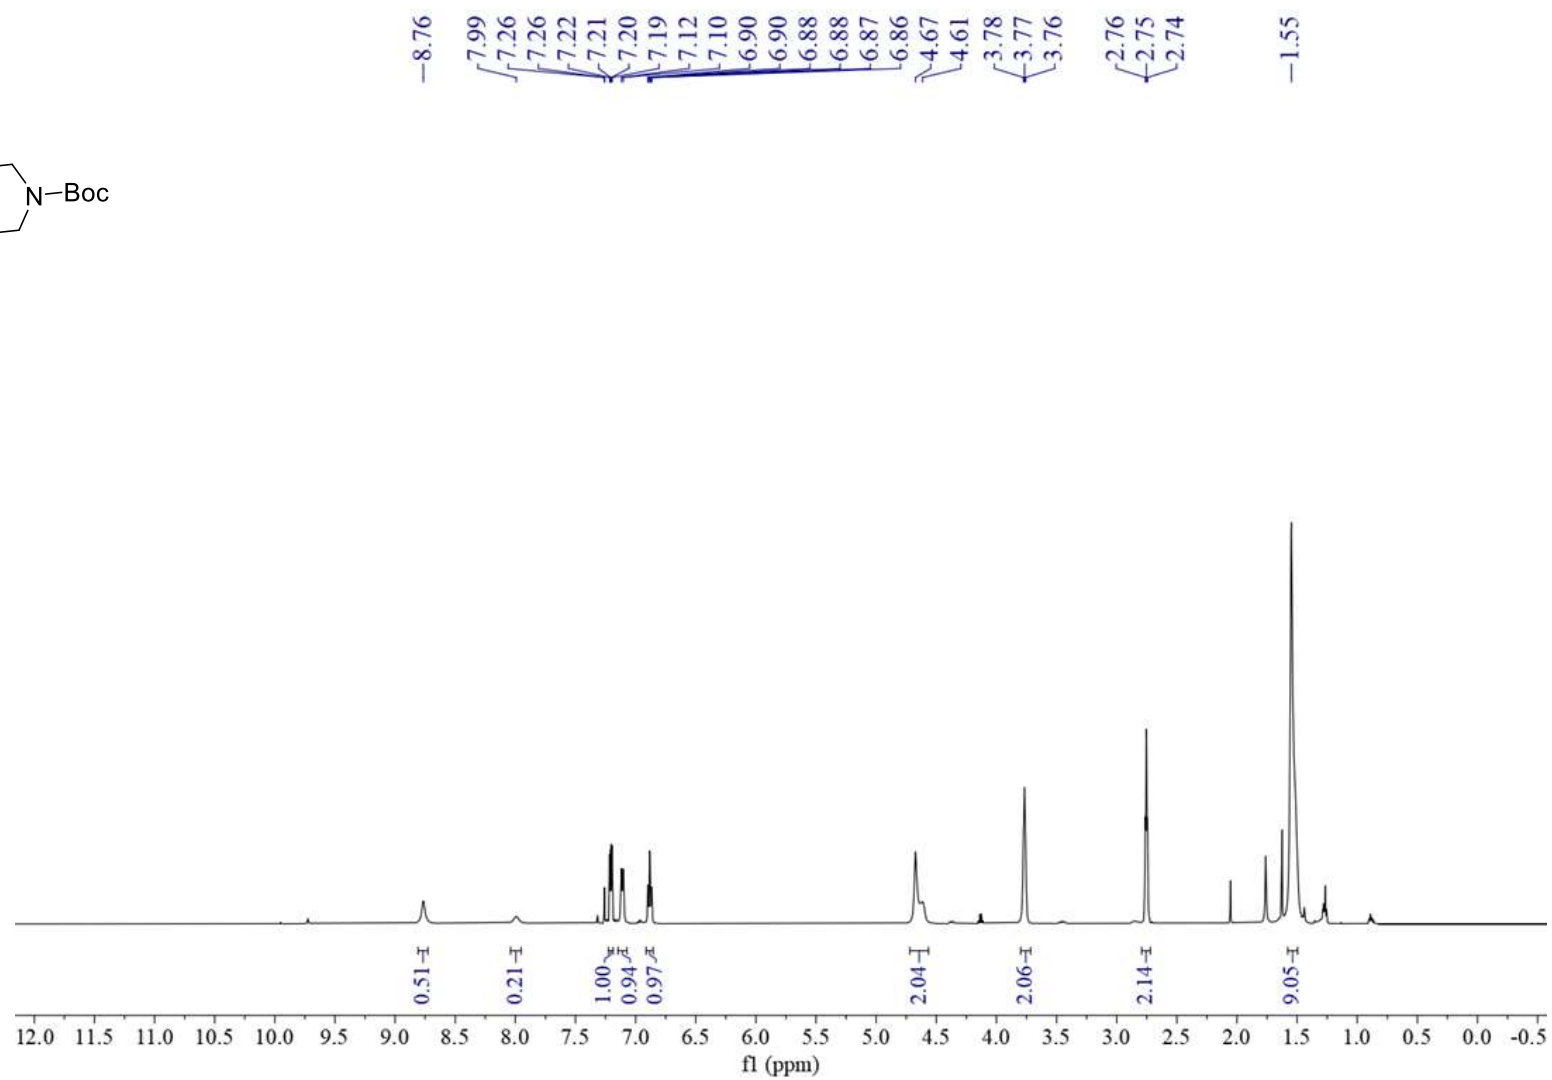

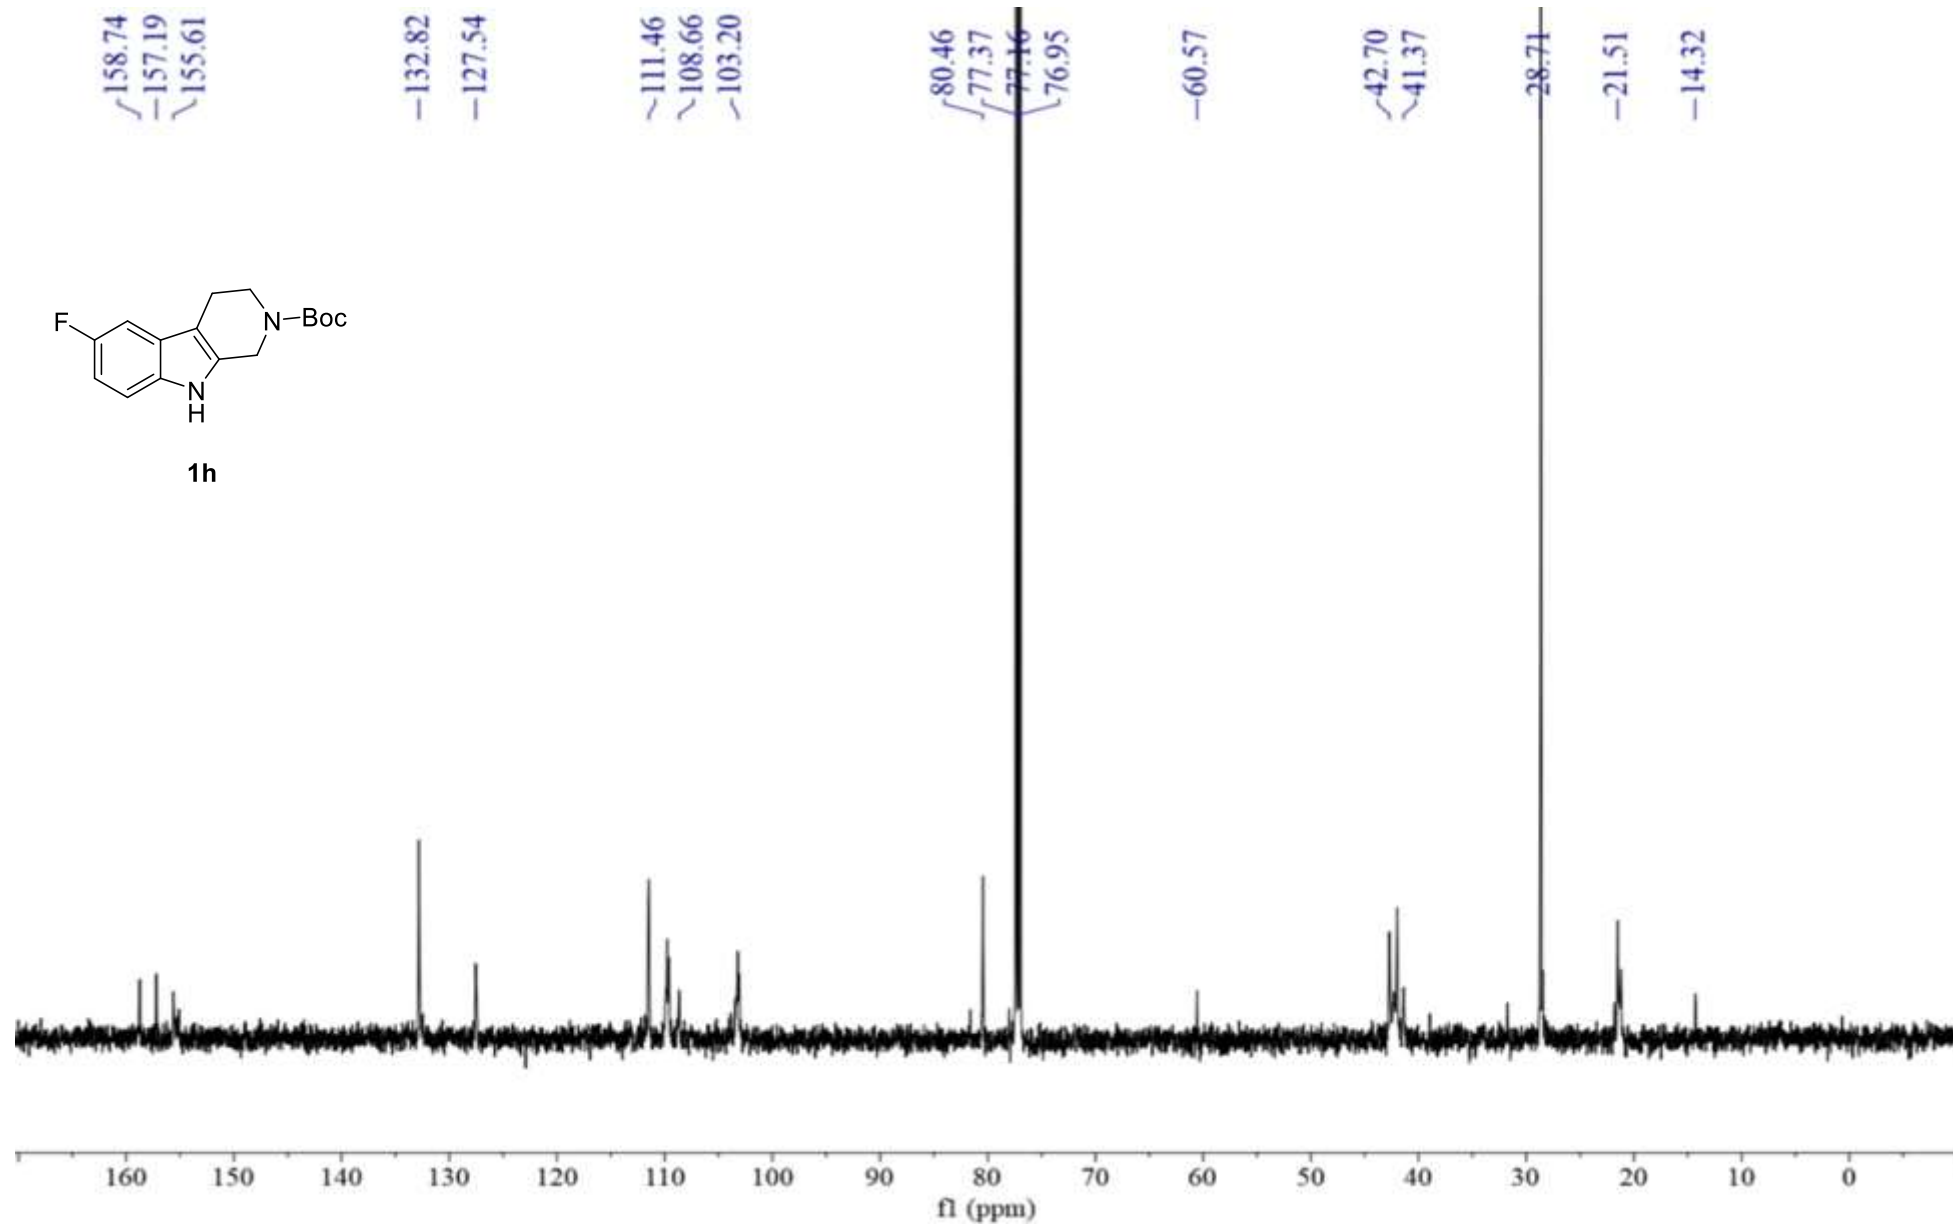

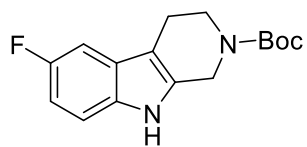

1h

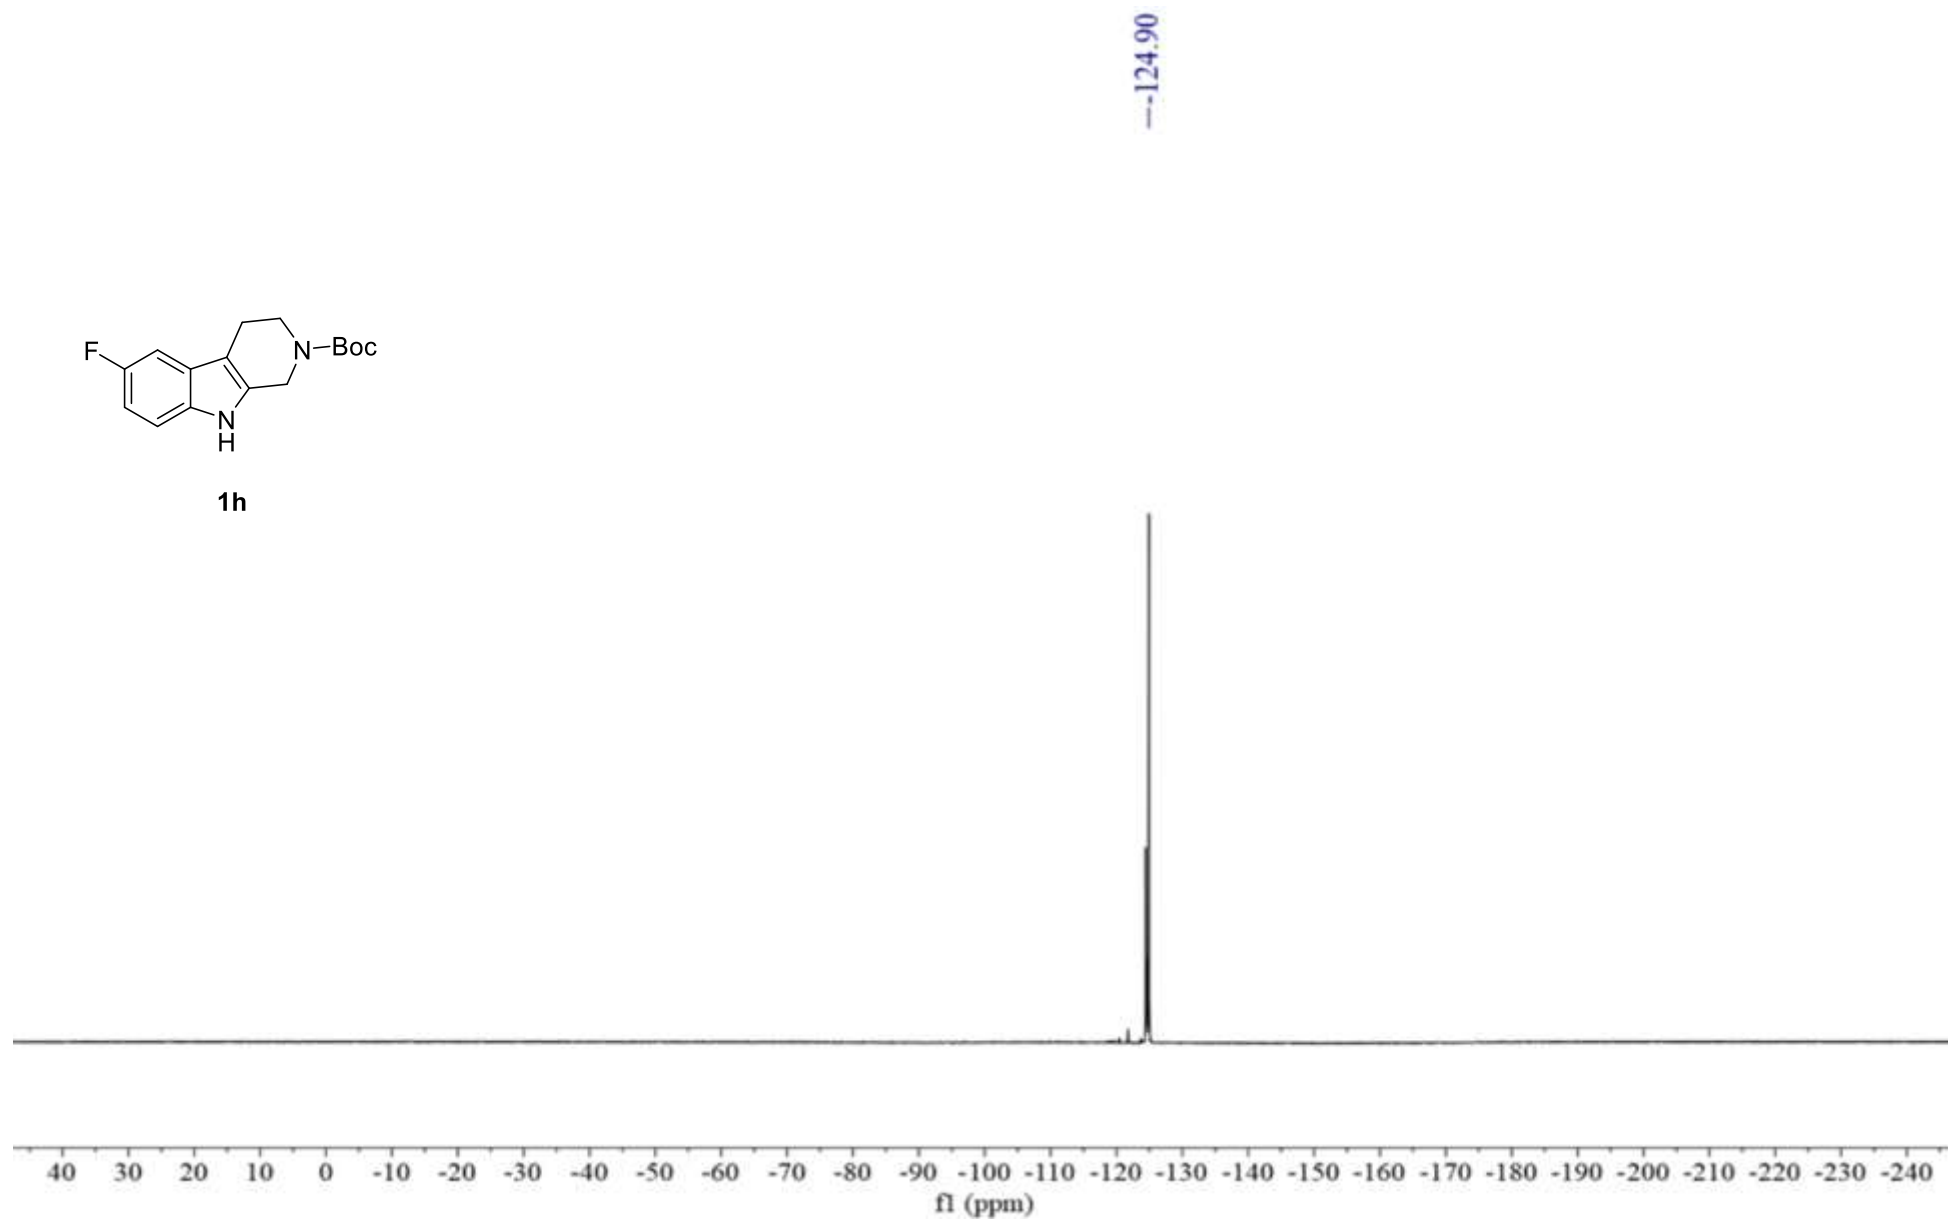

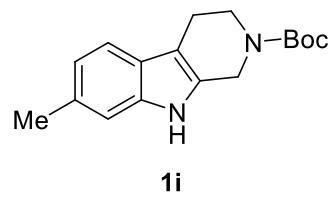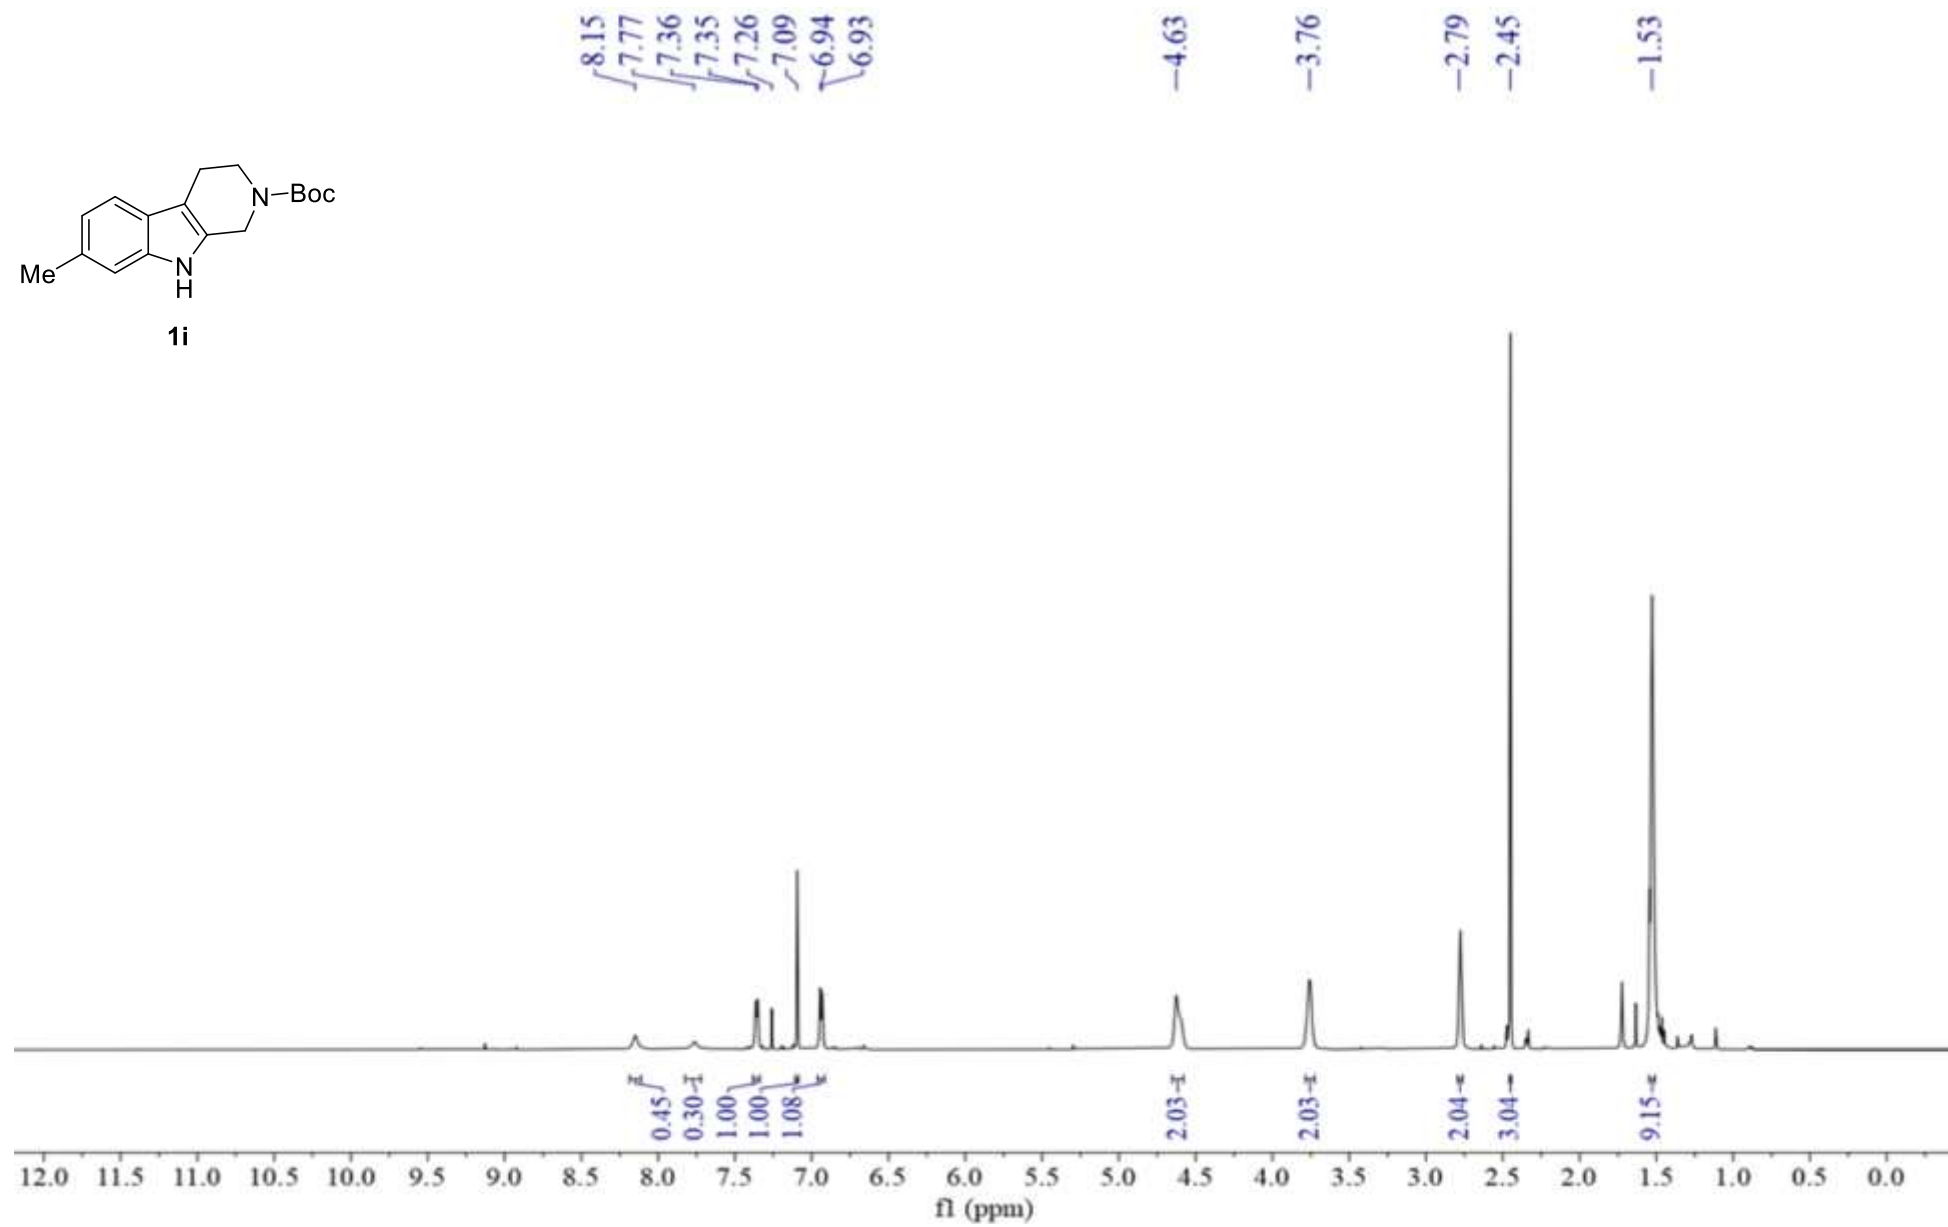

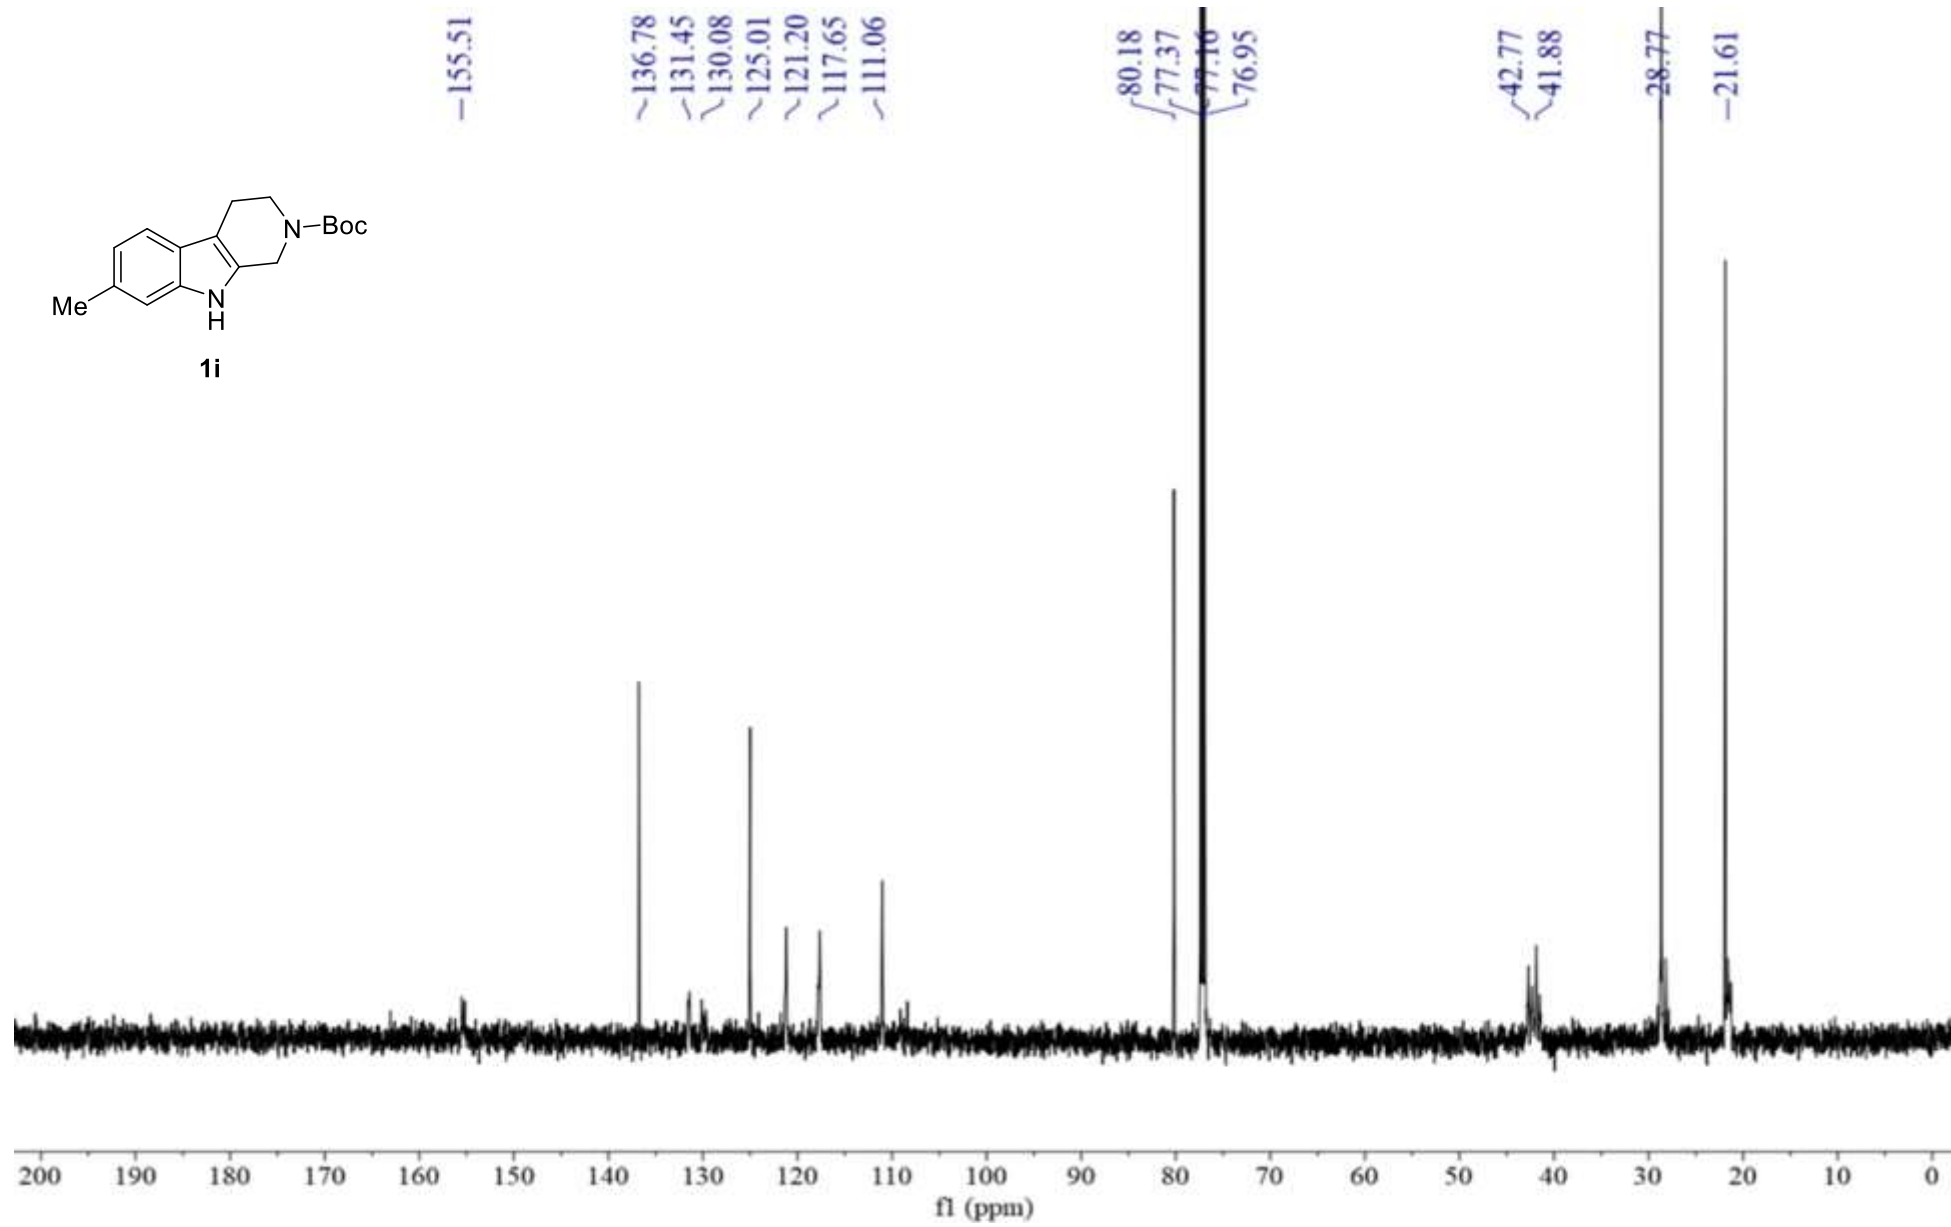

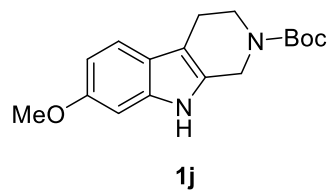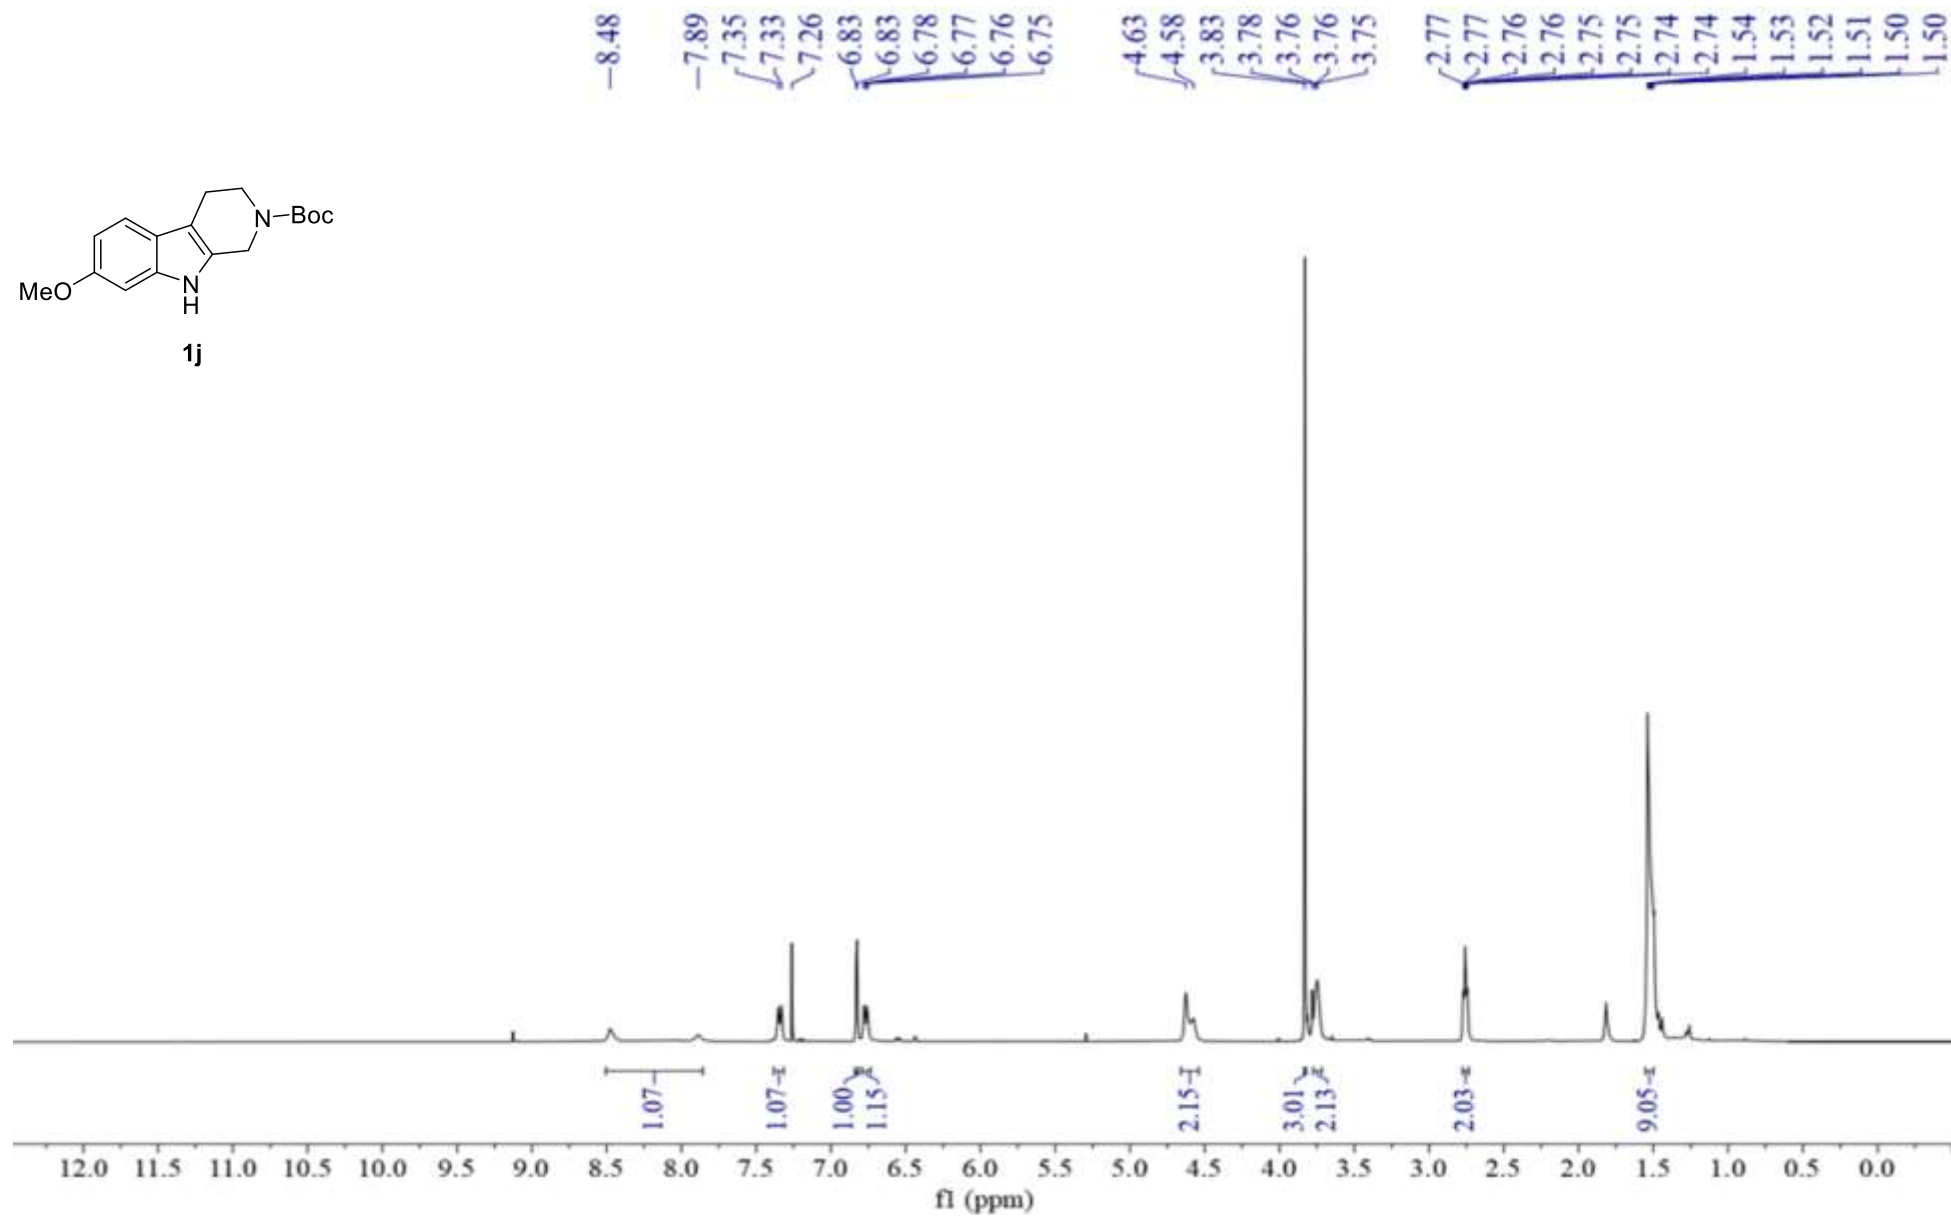

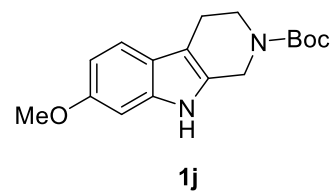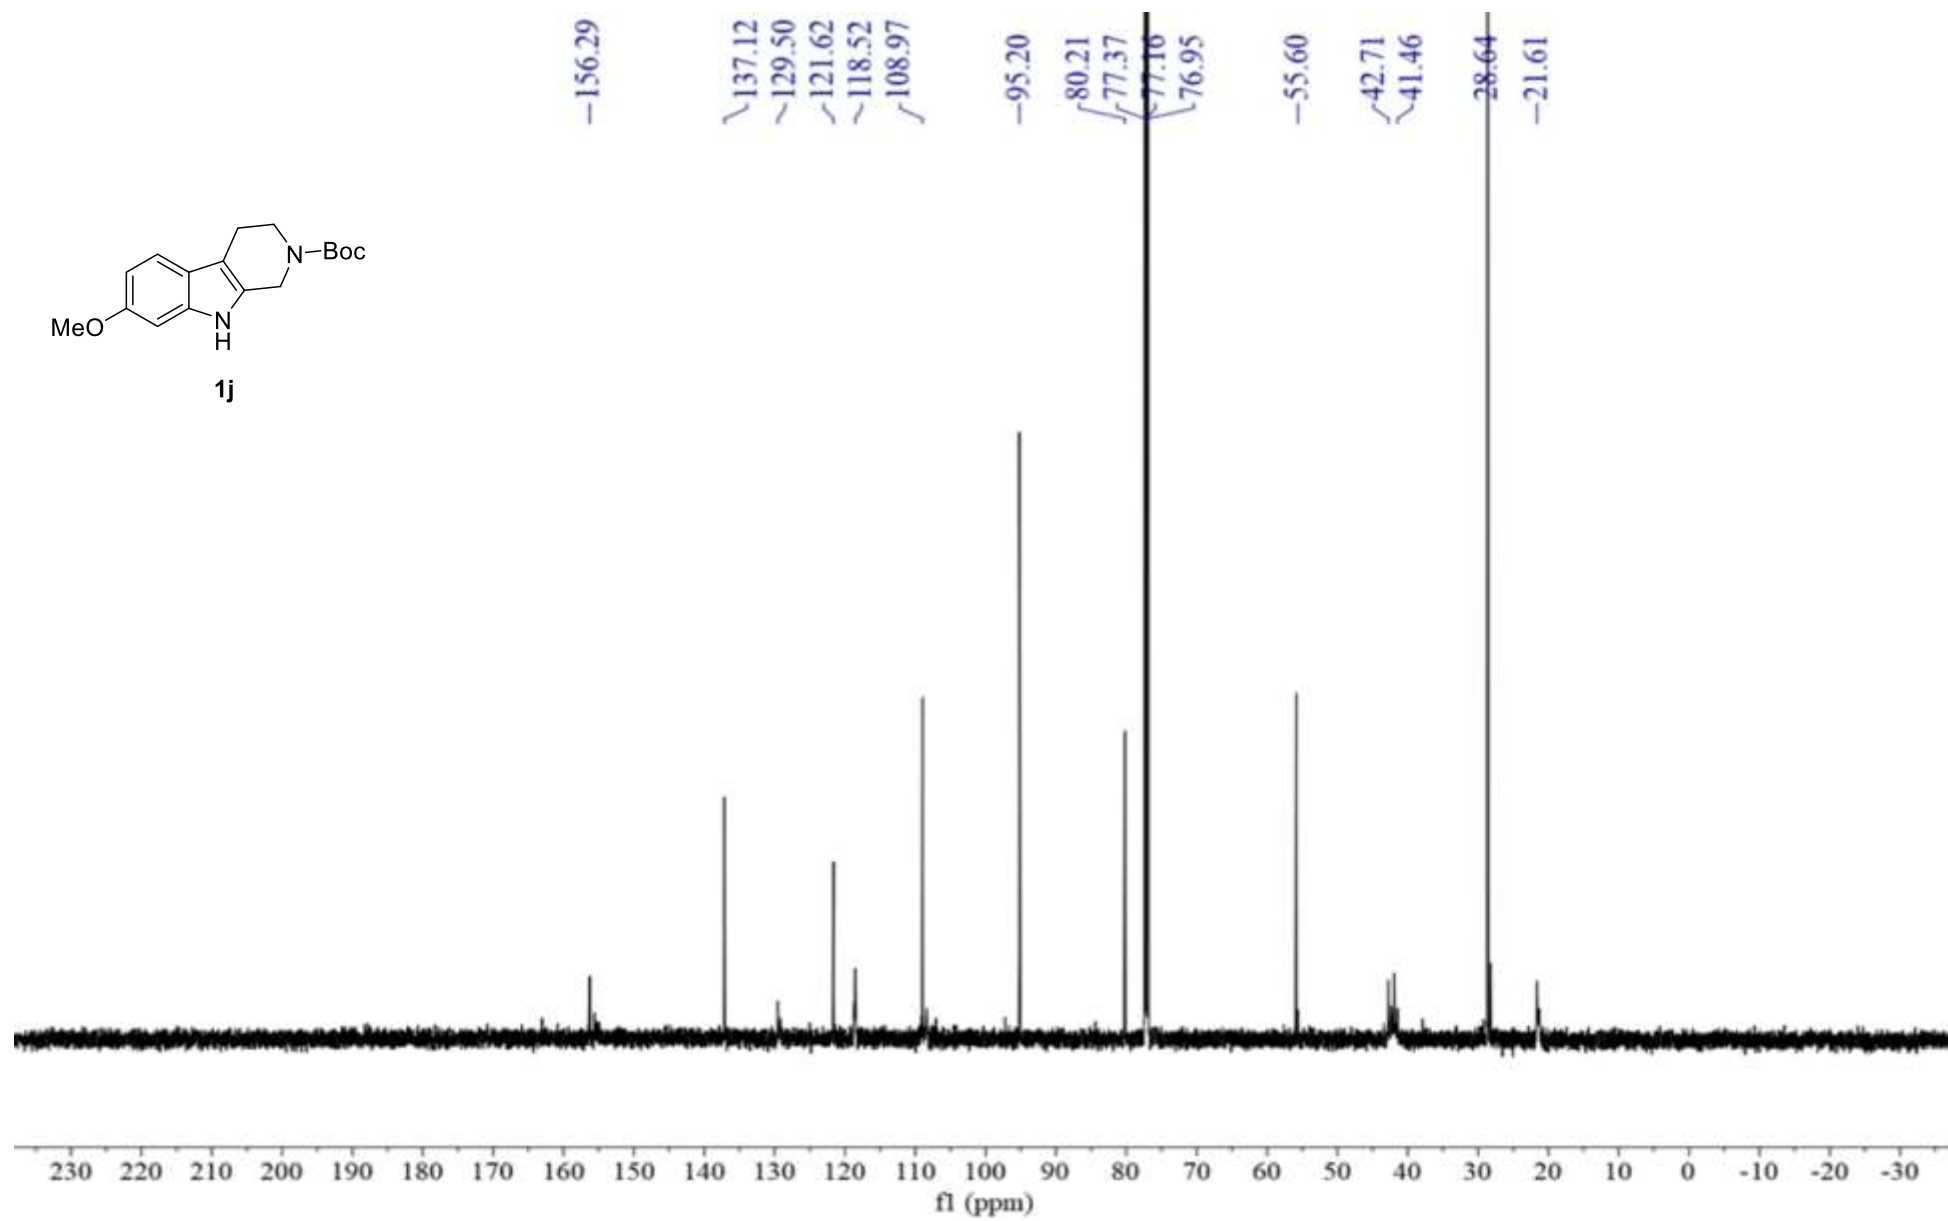

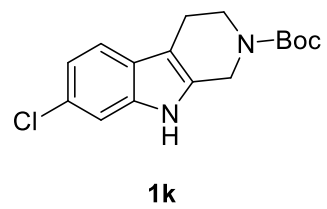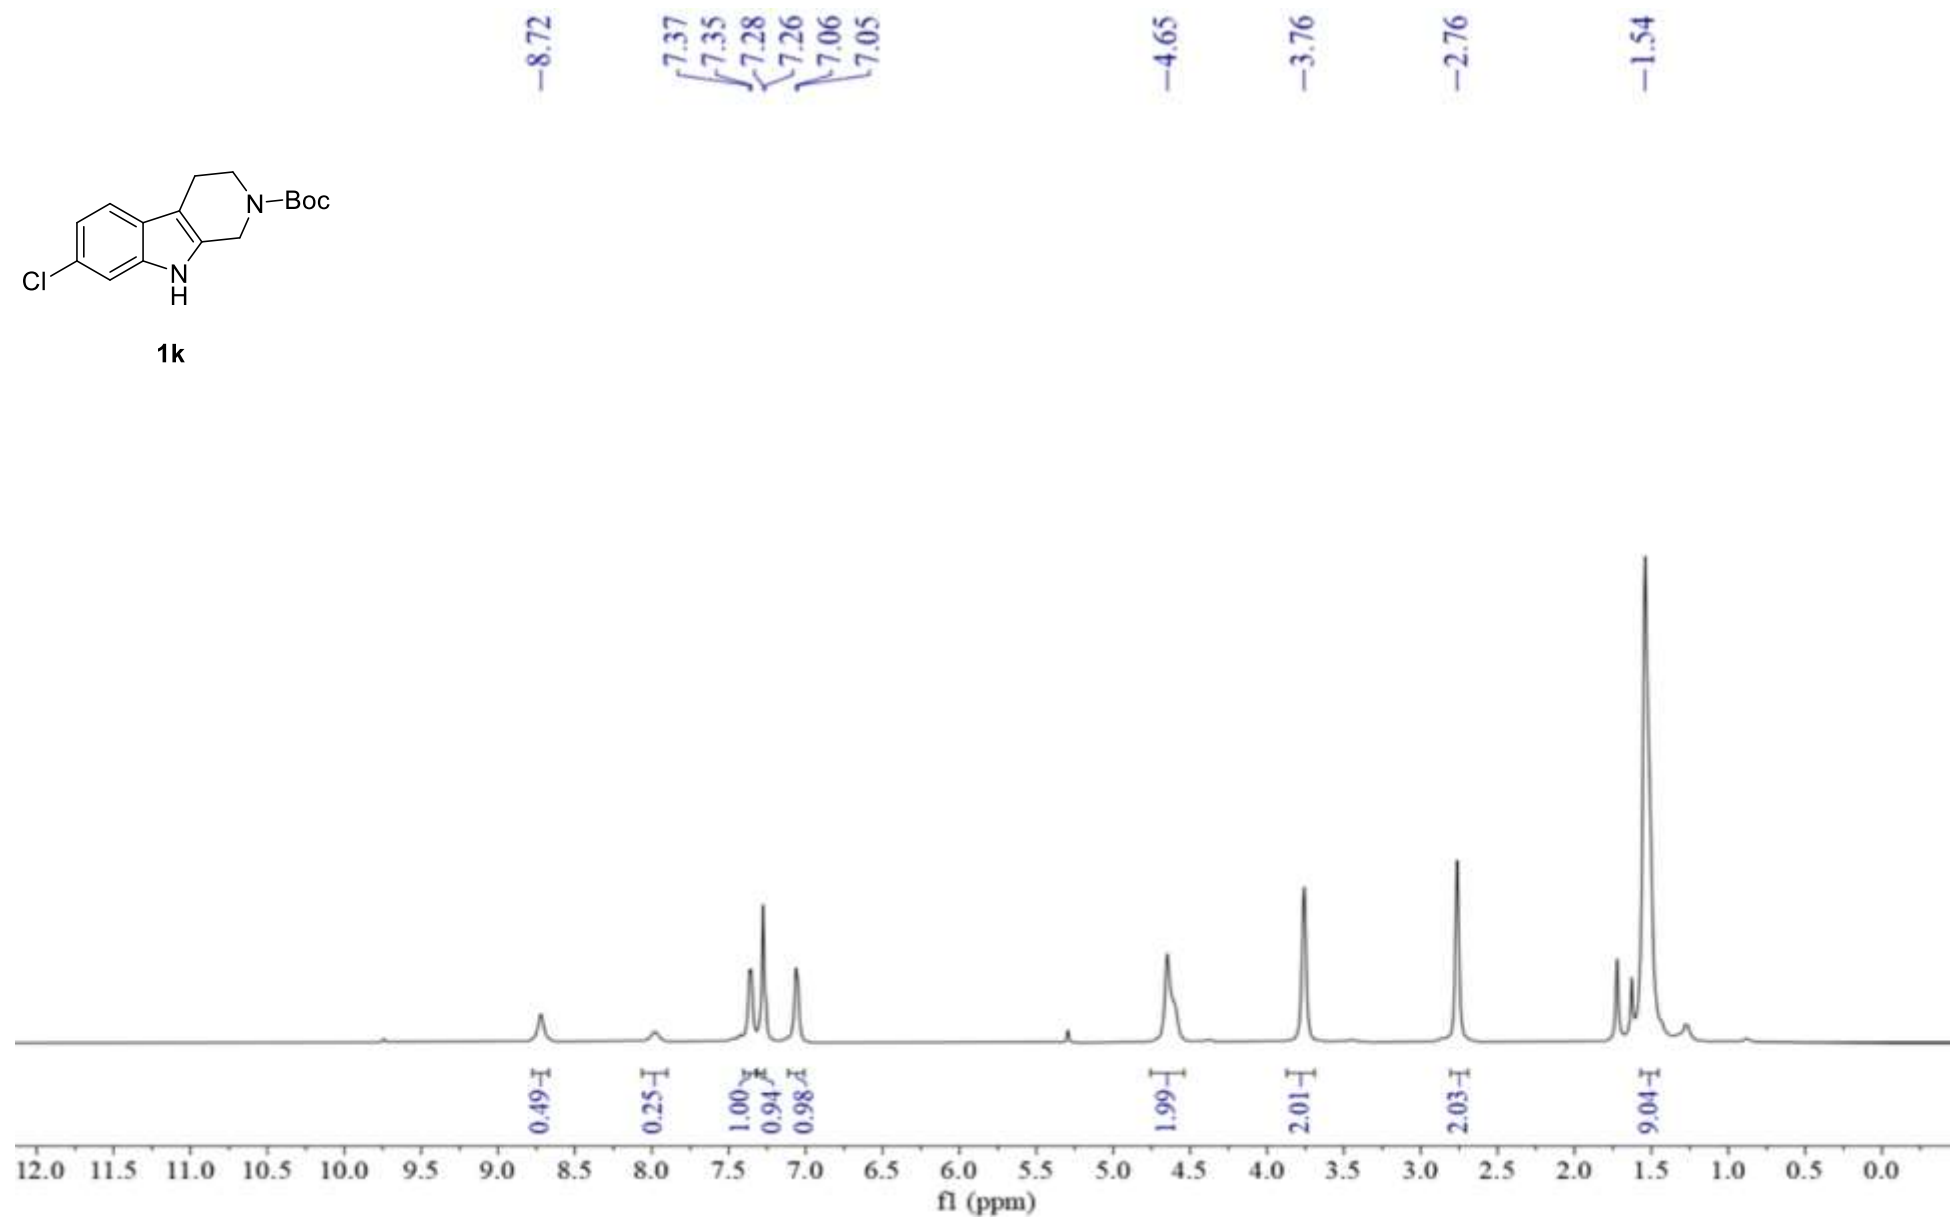

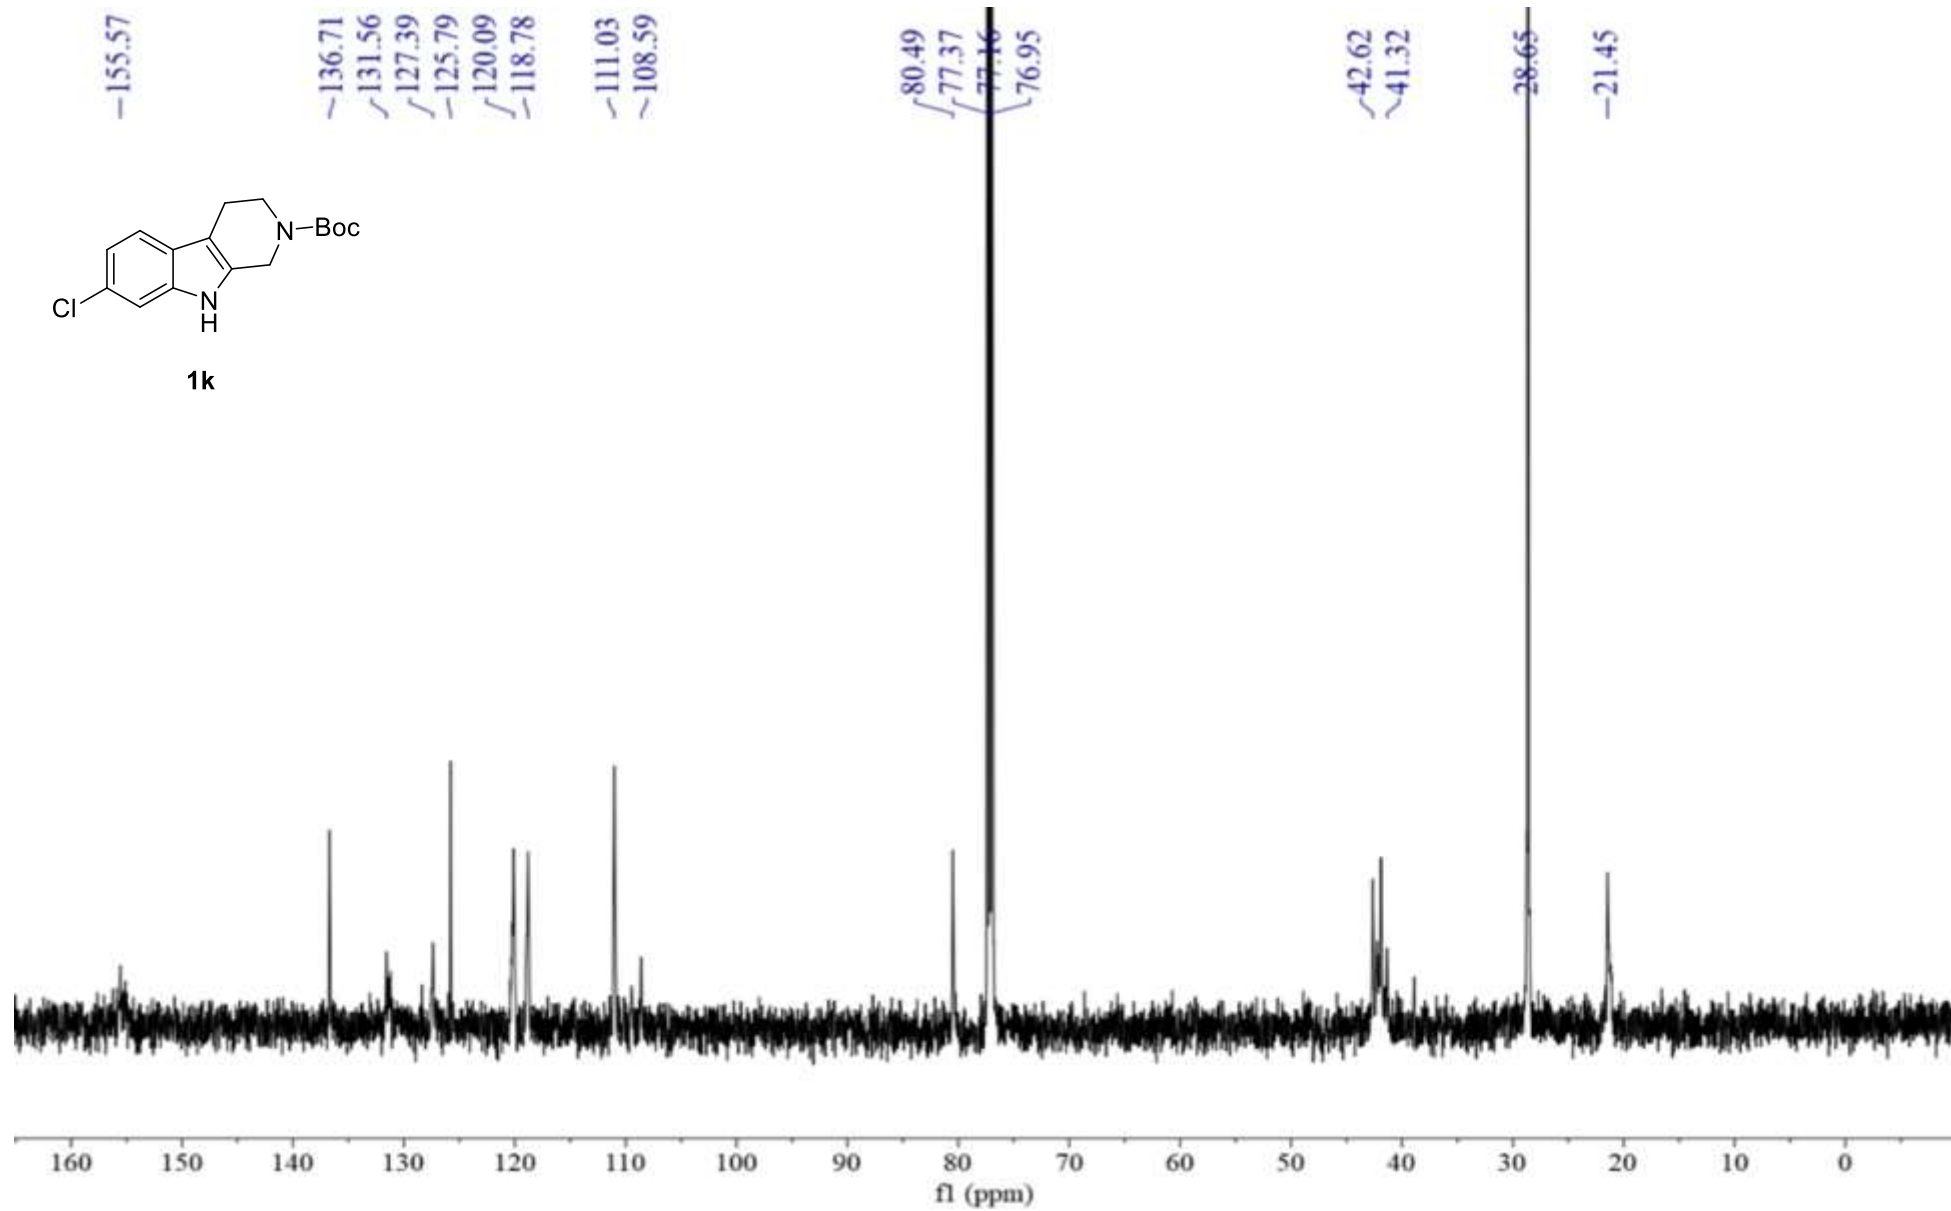

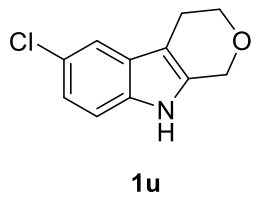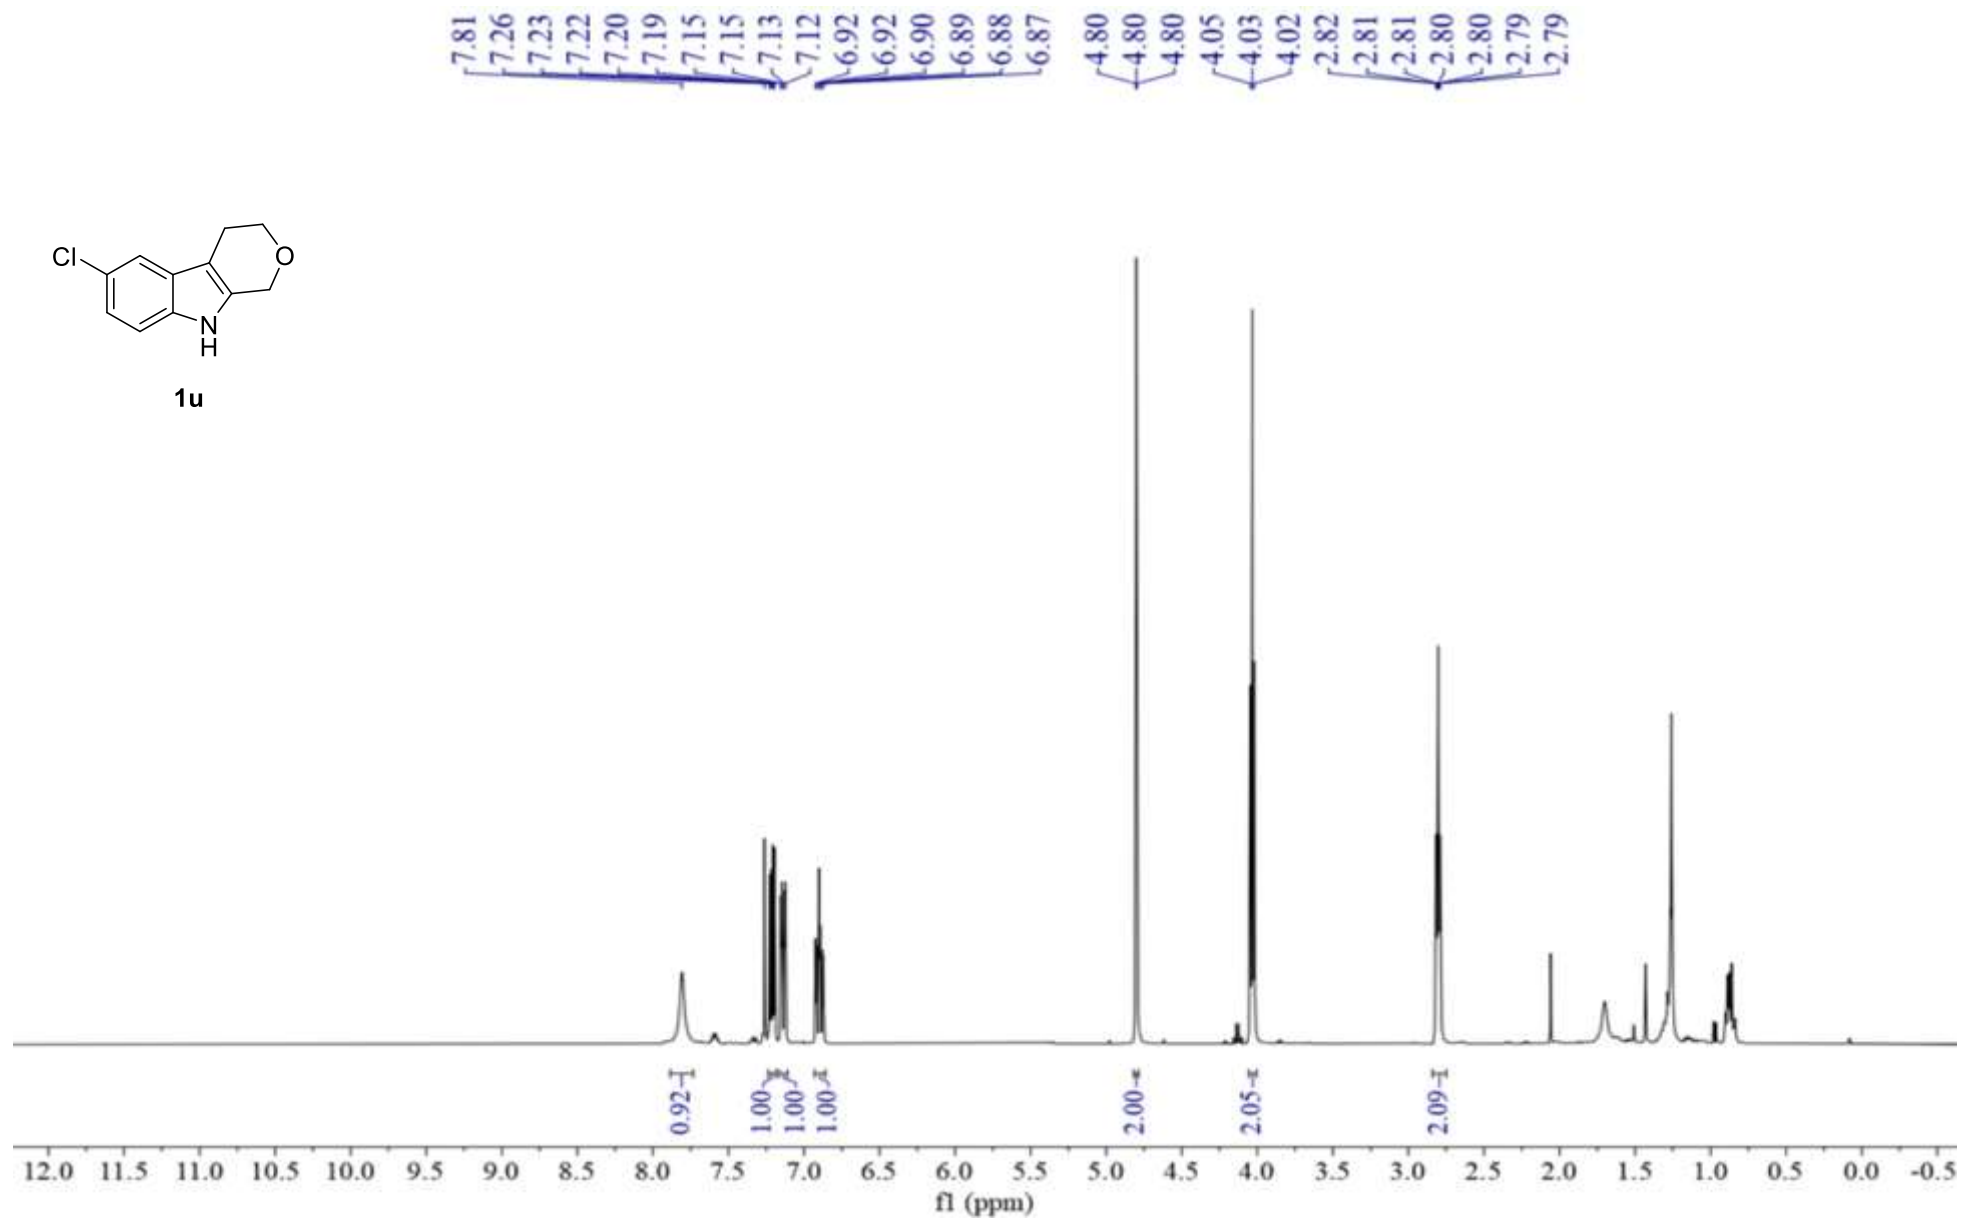

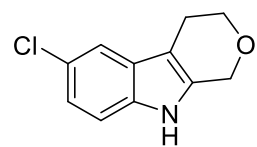

1u

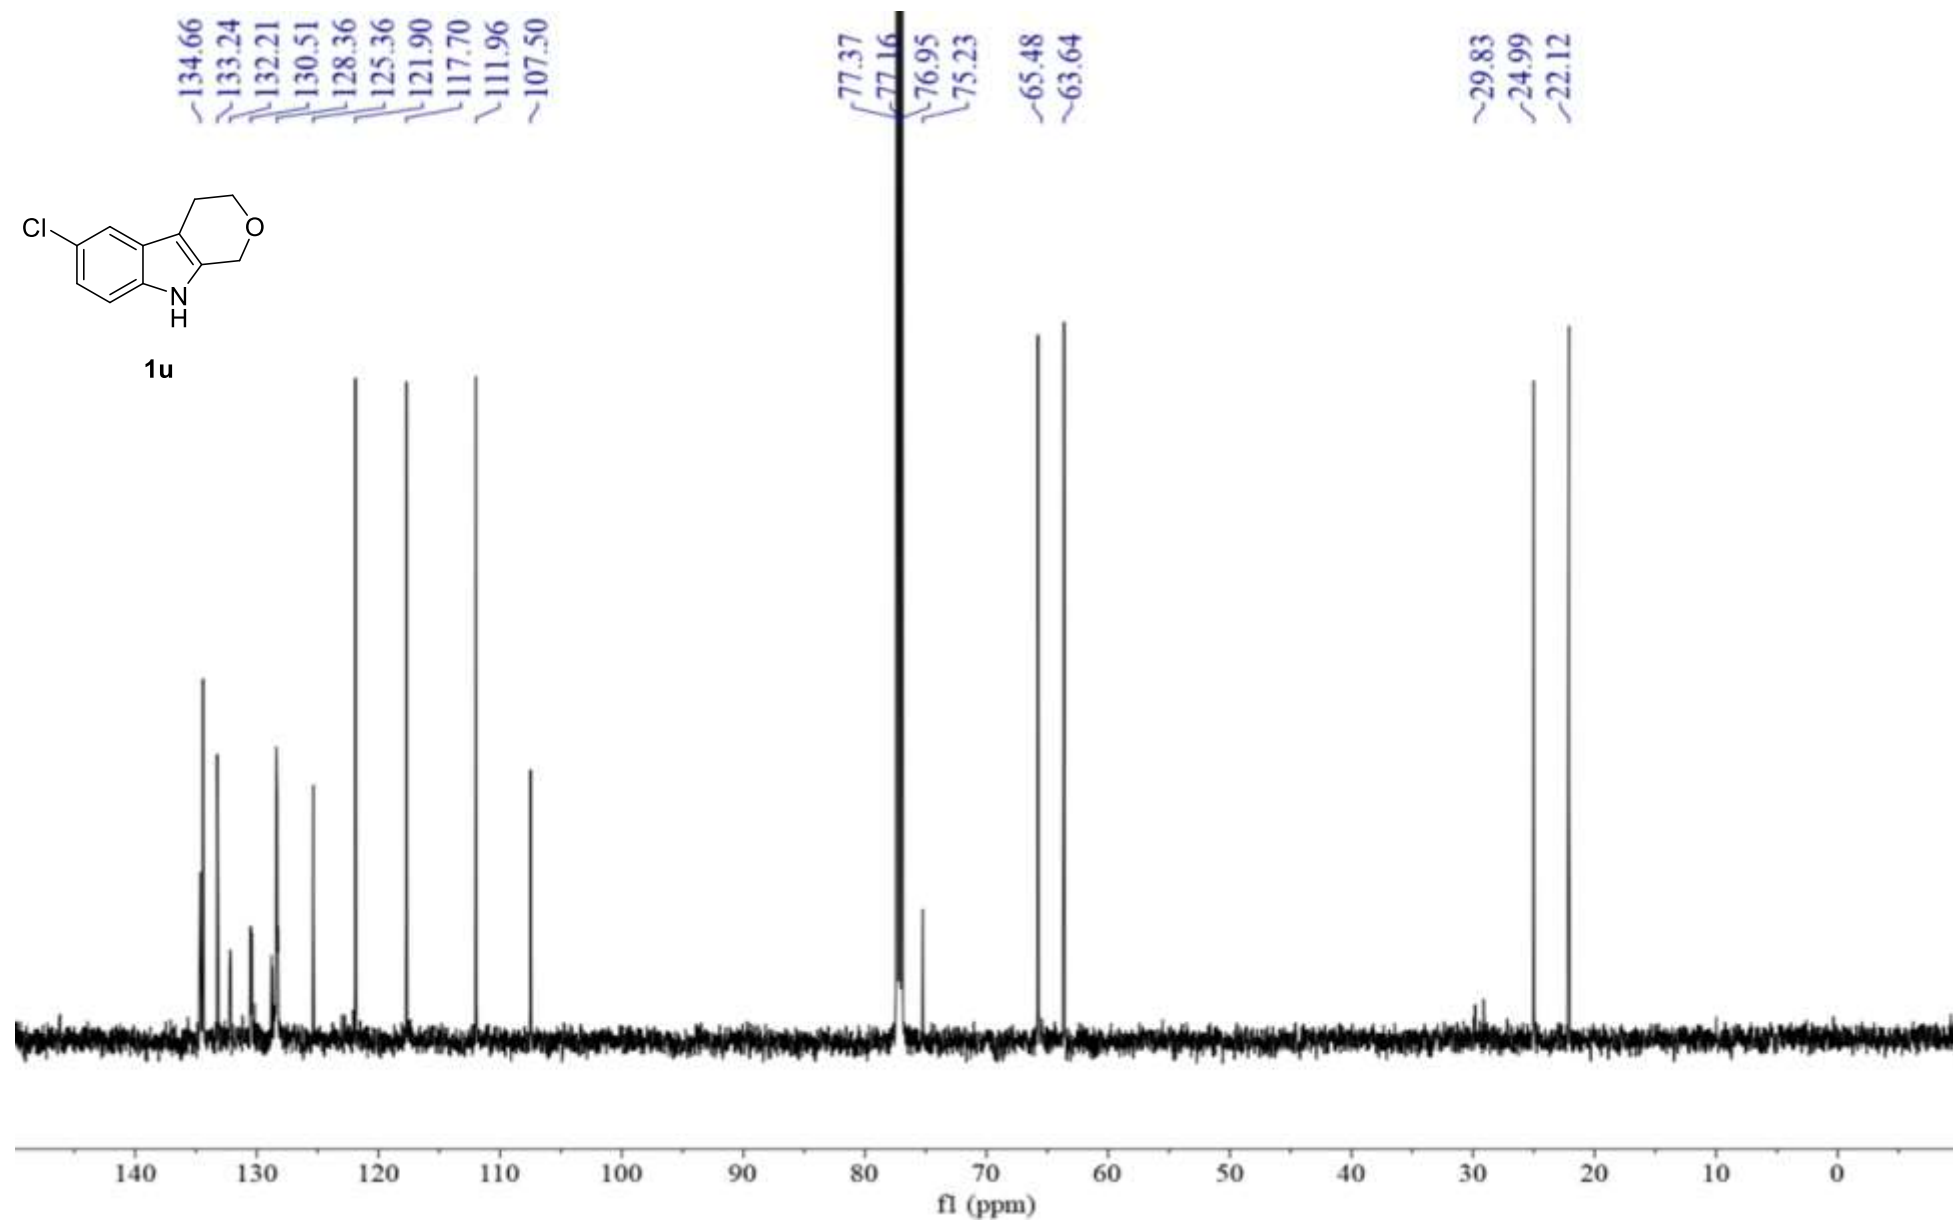

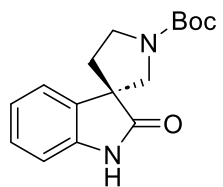

2a

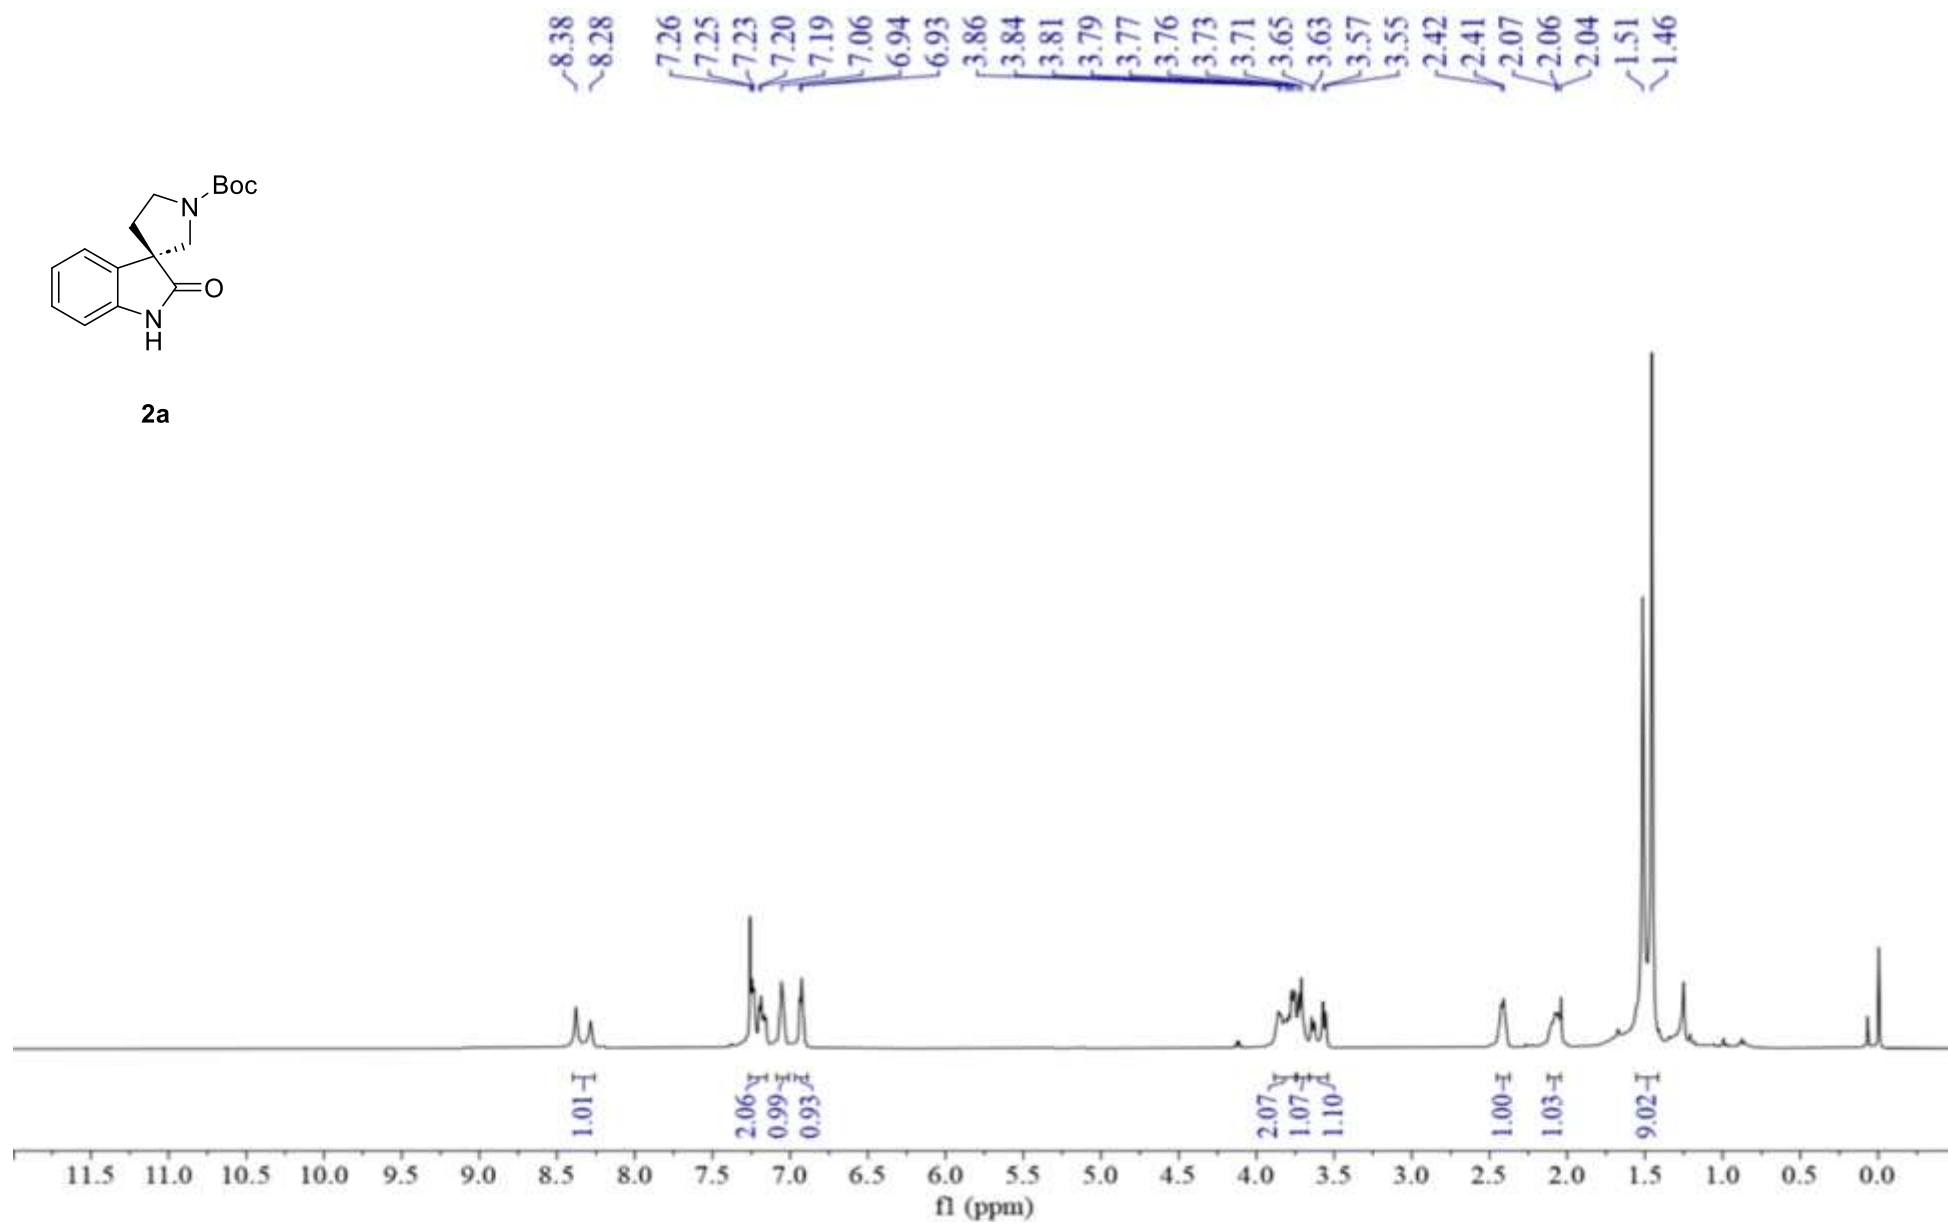

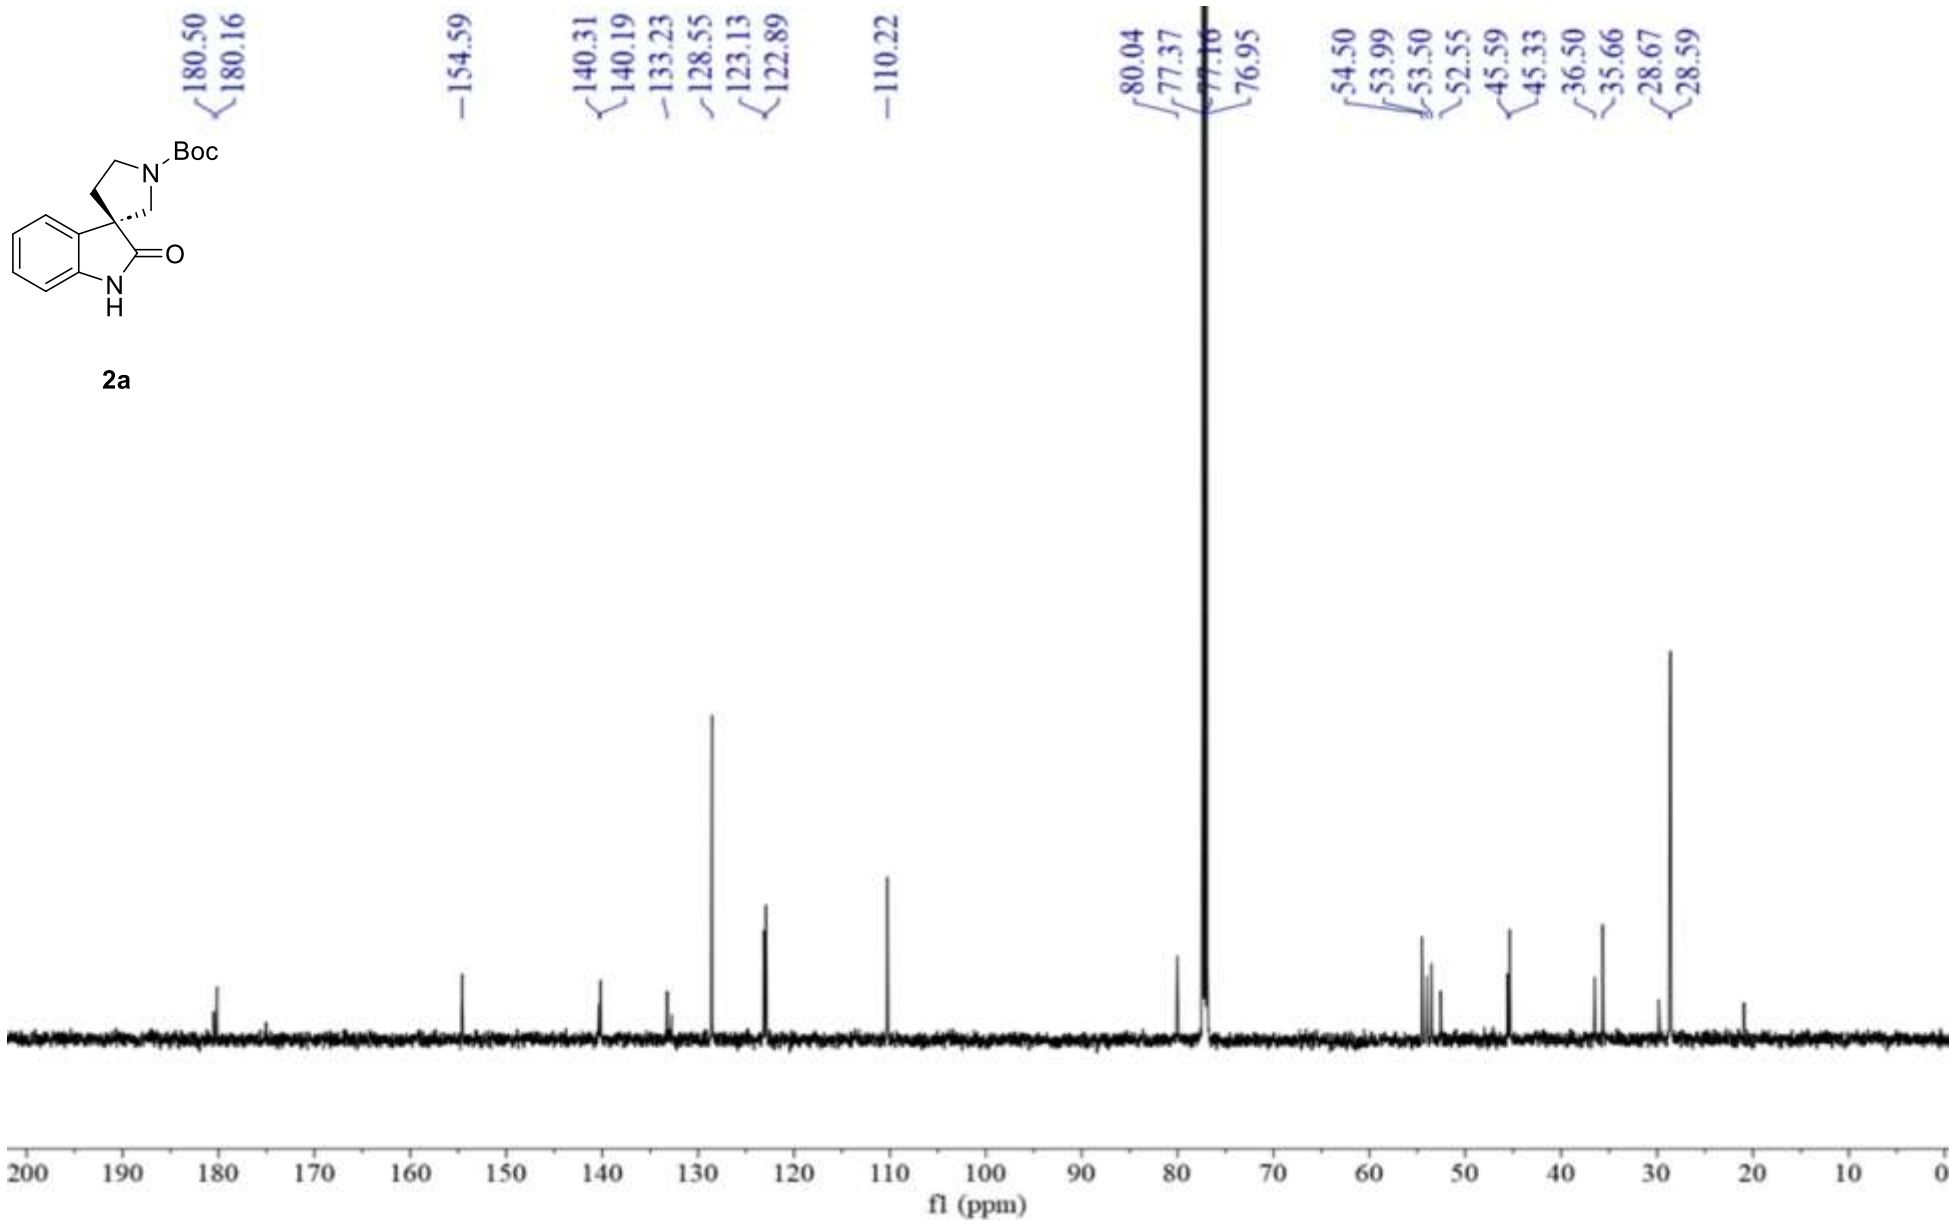

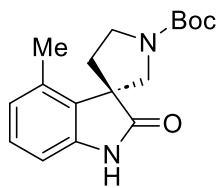

2b

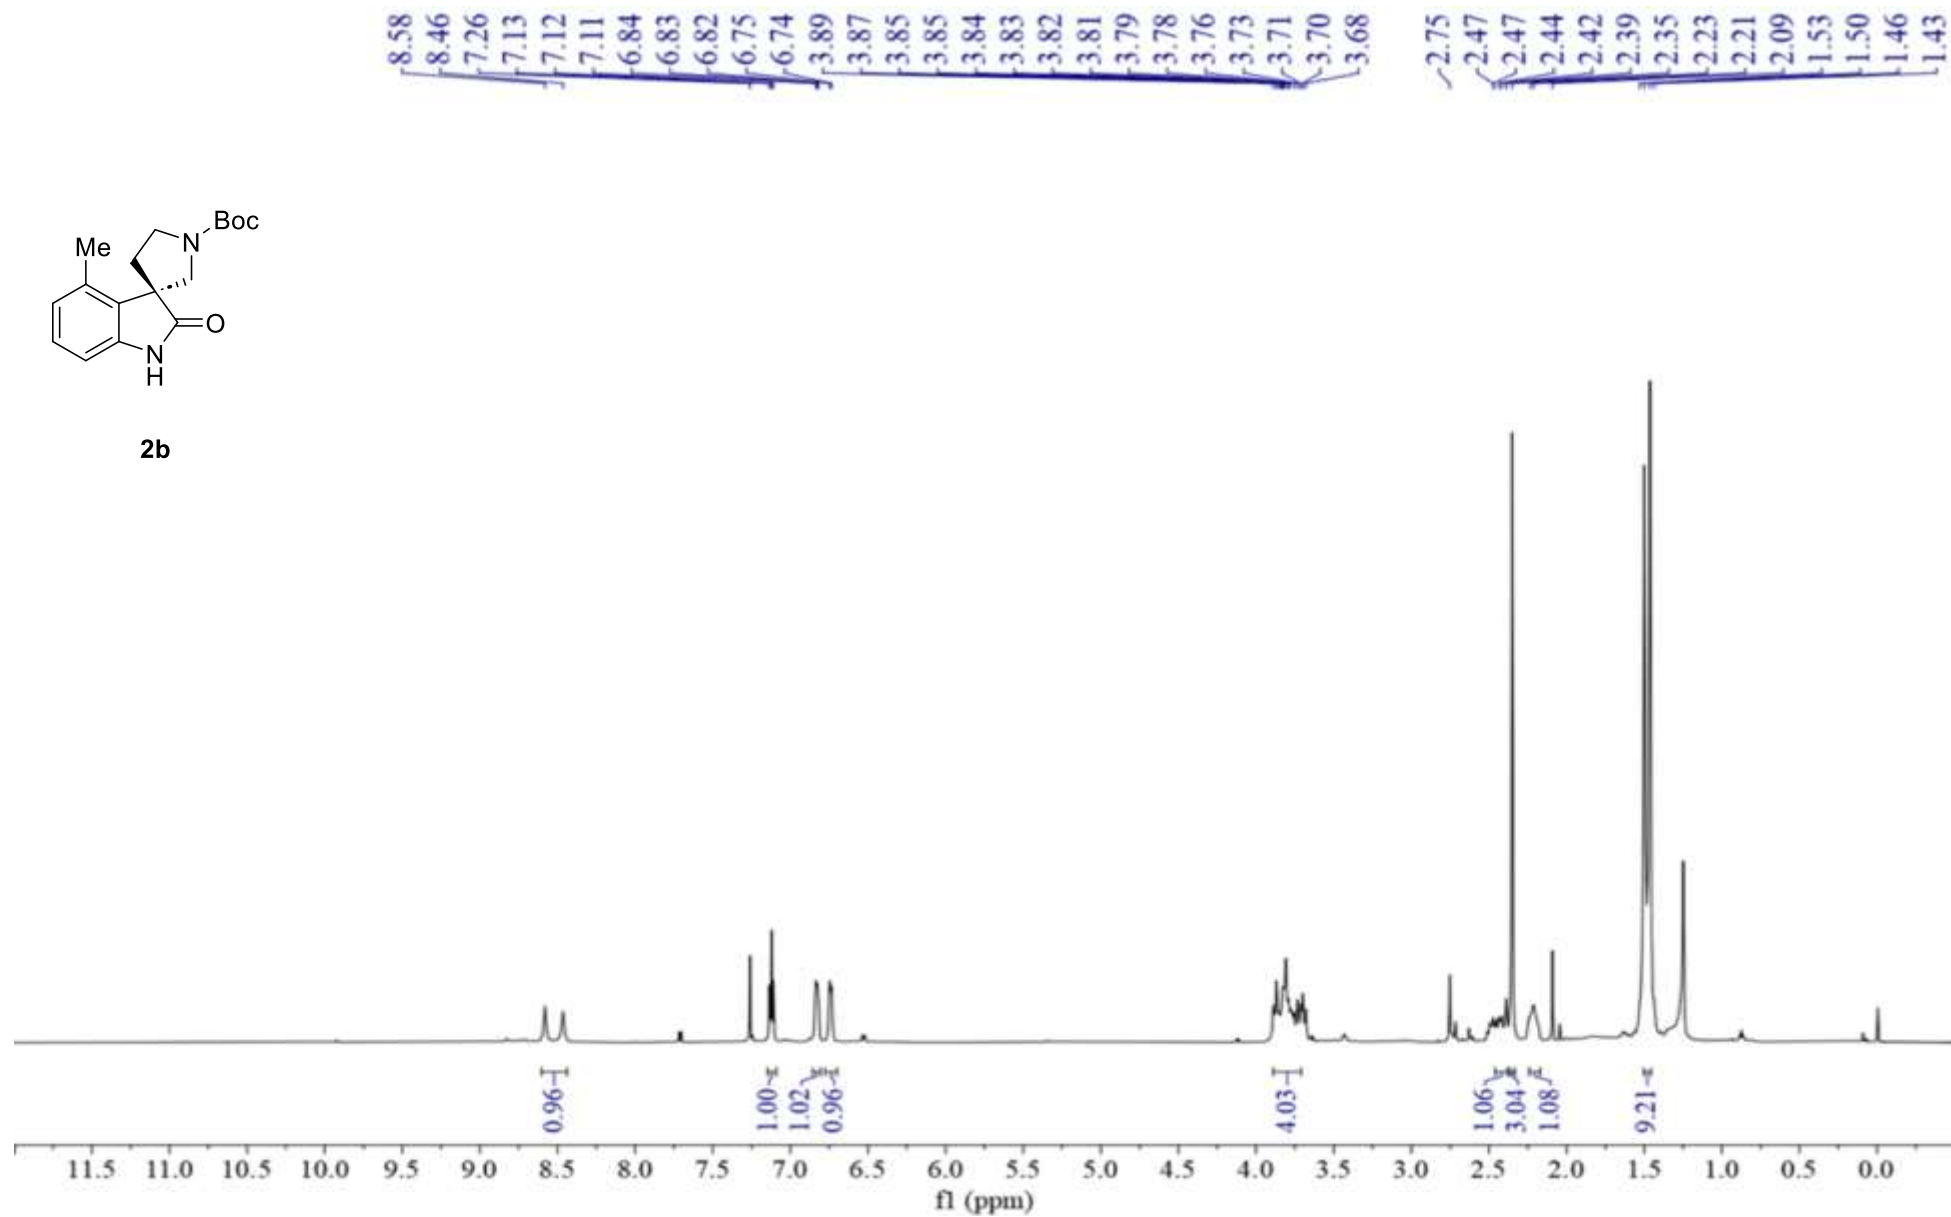

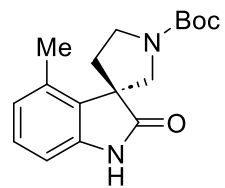

2b

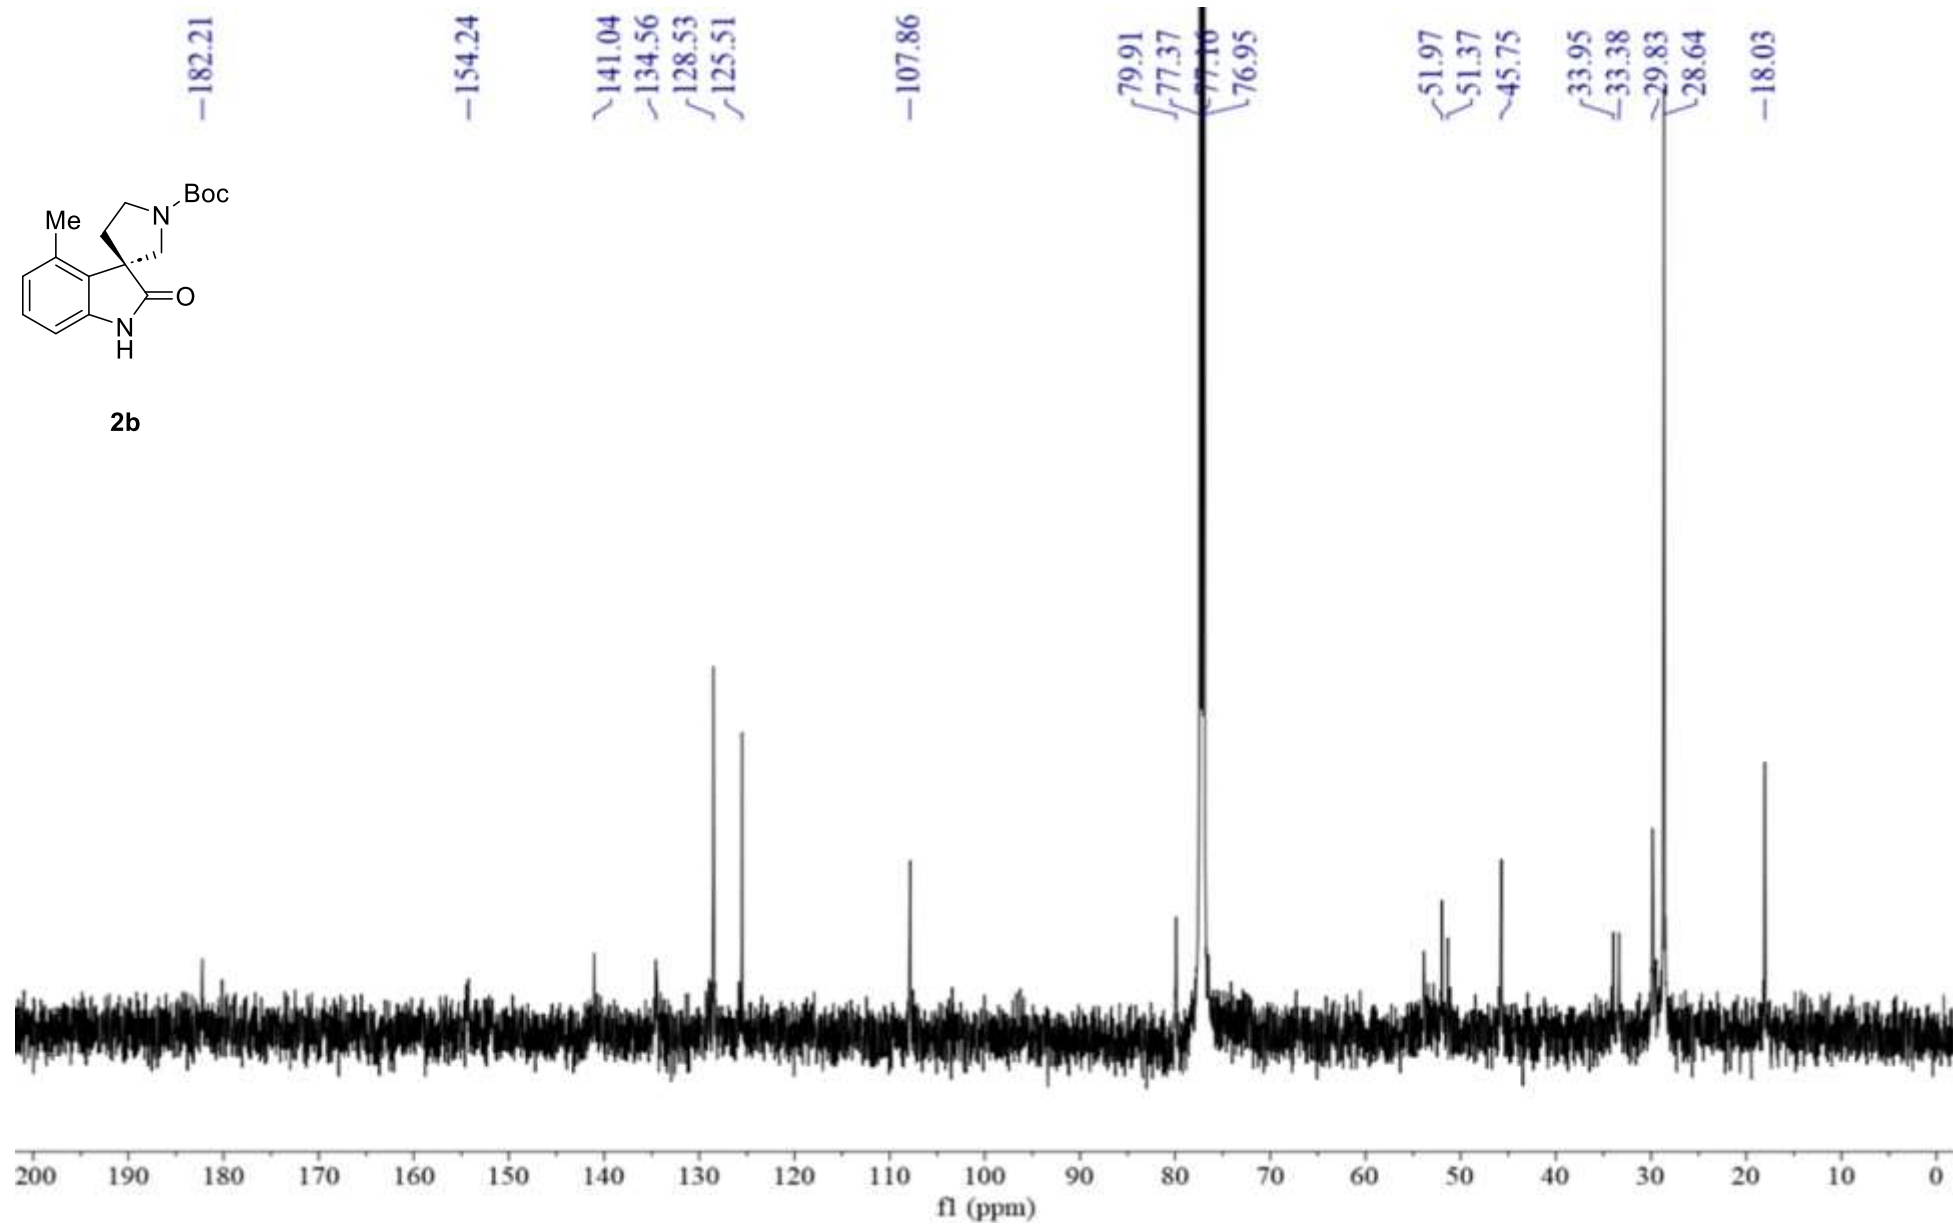

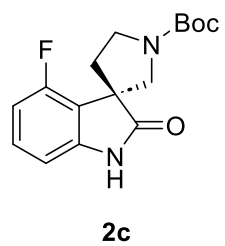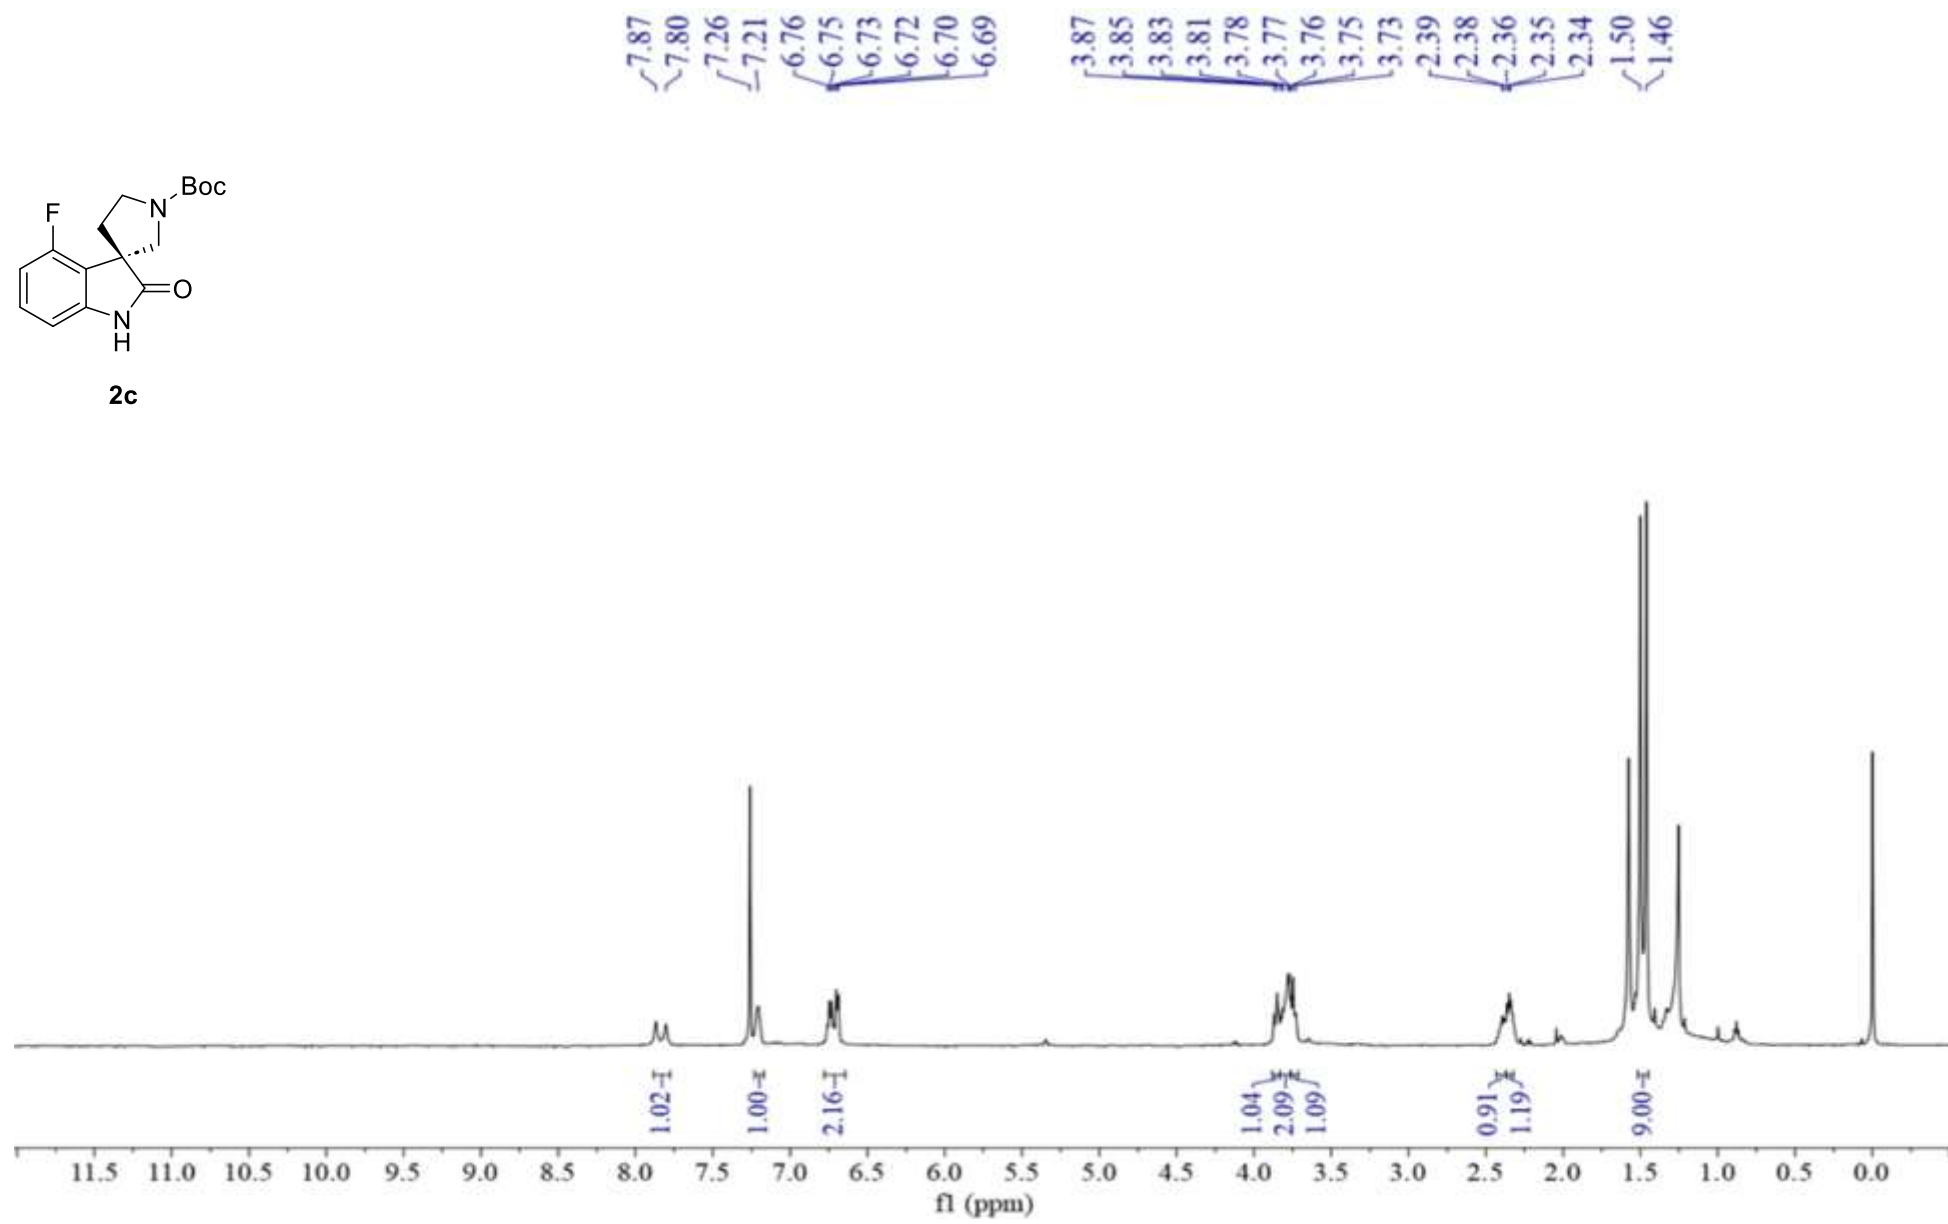

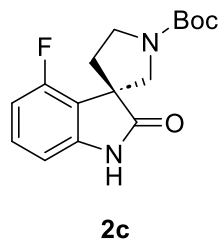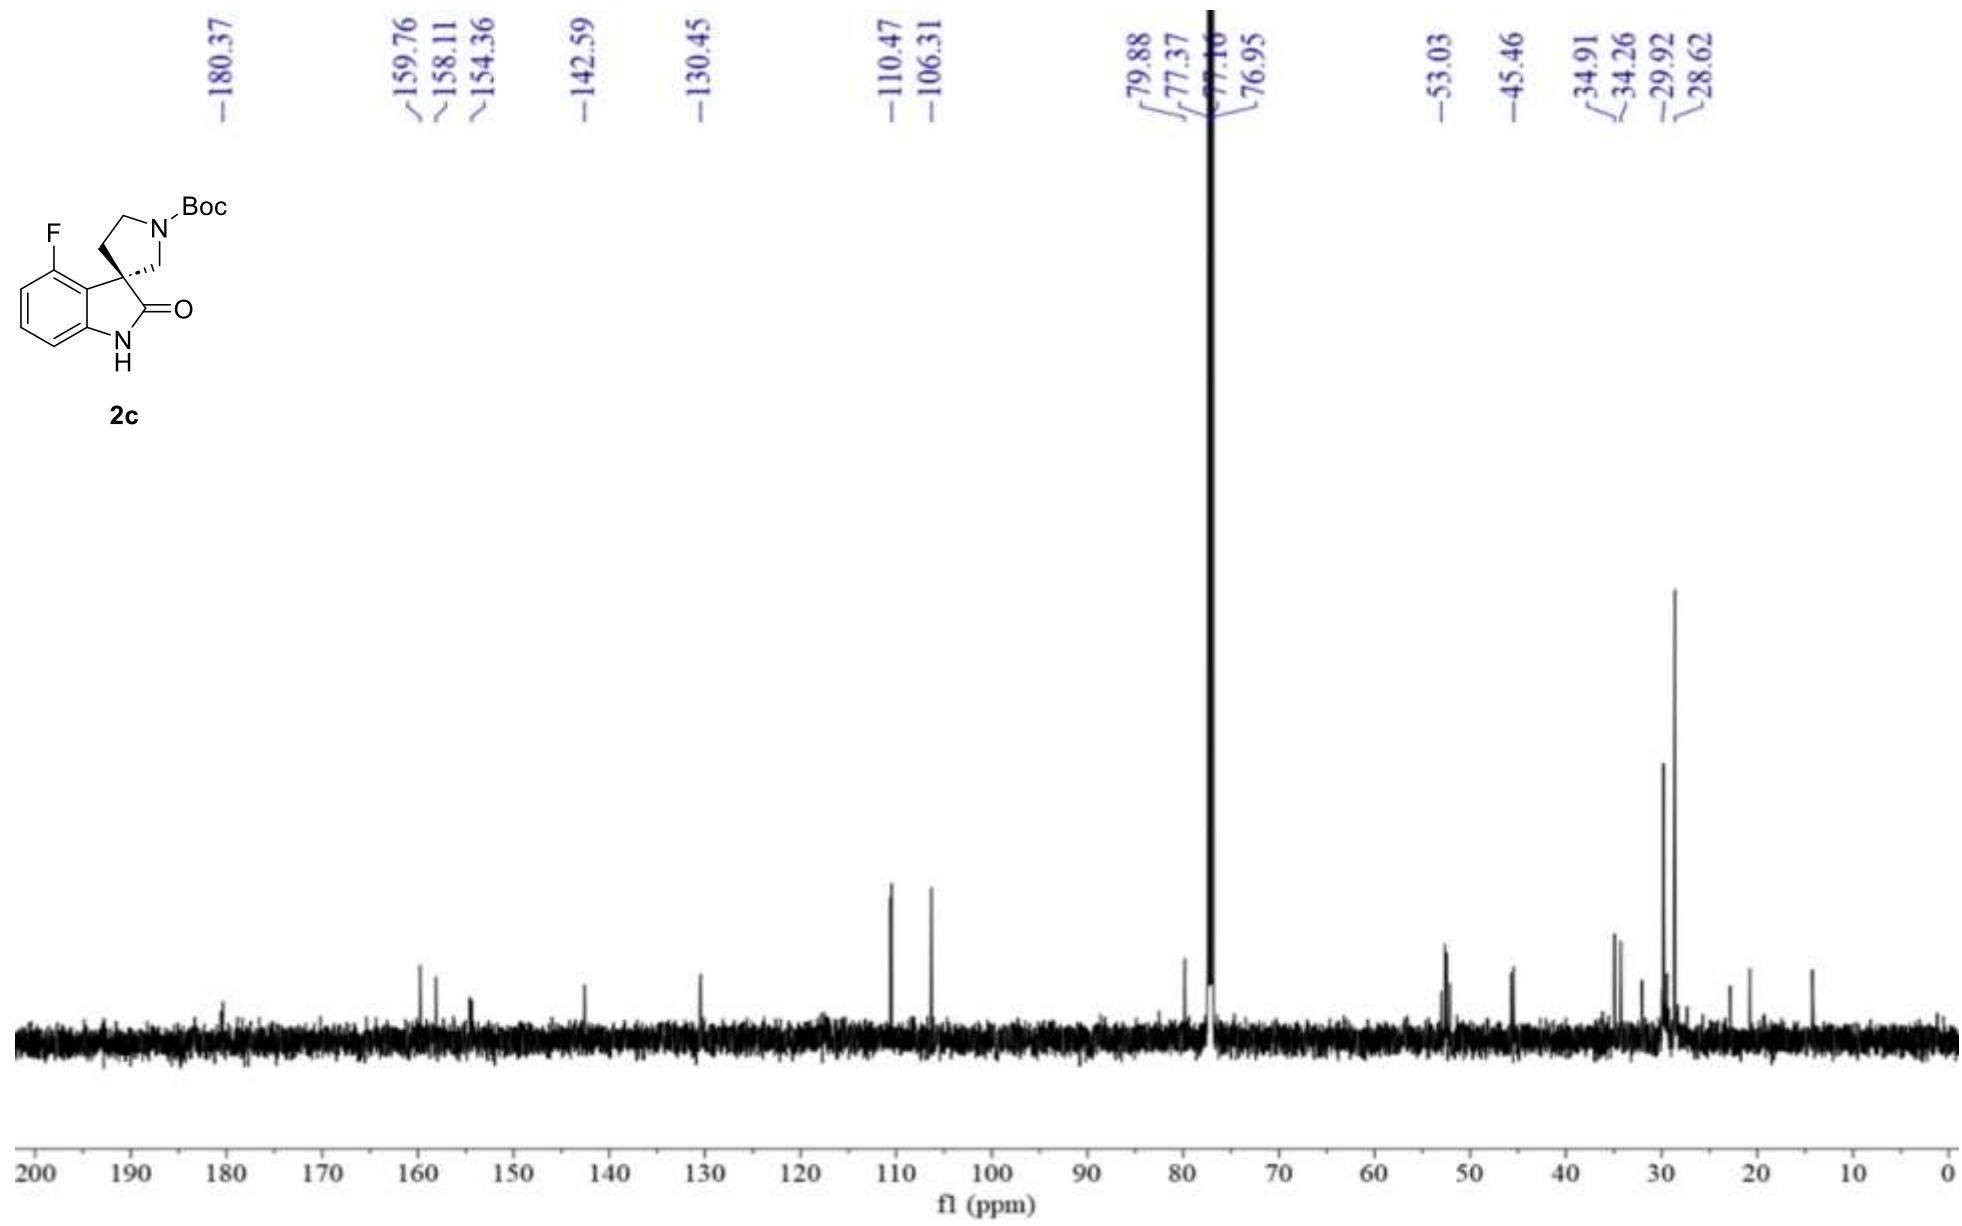

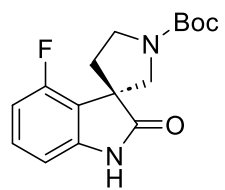

2c

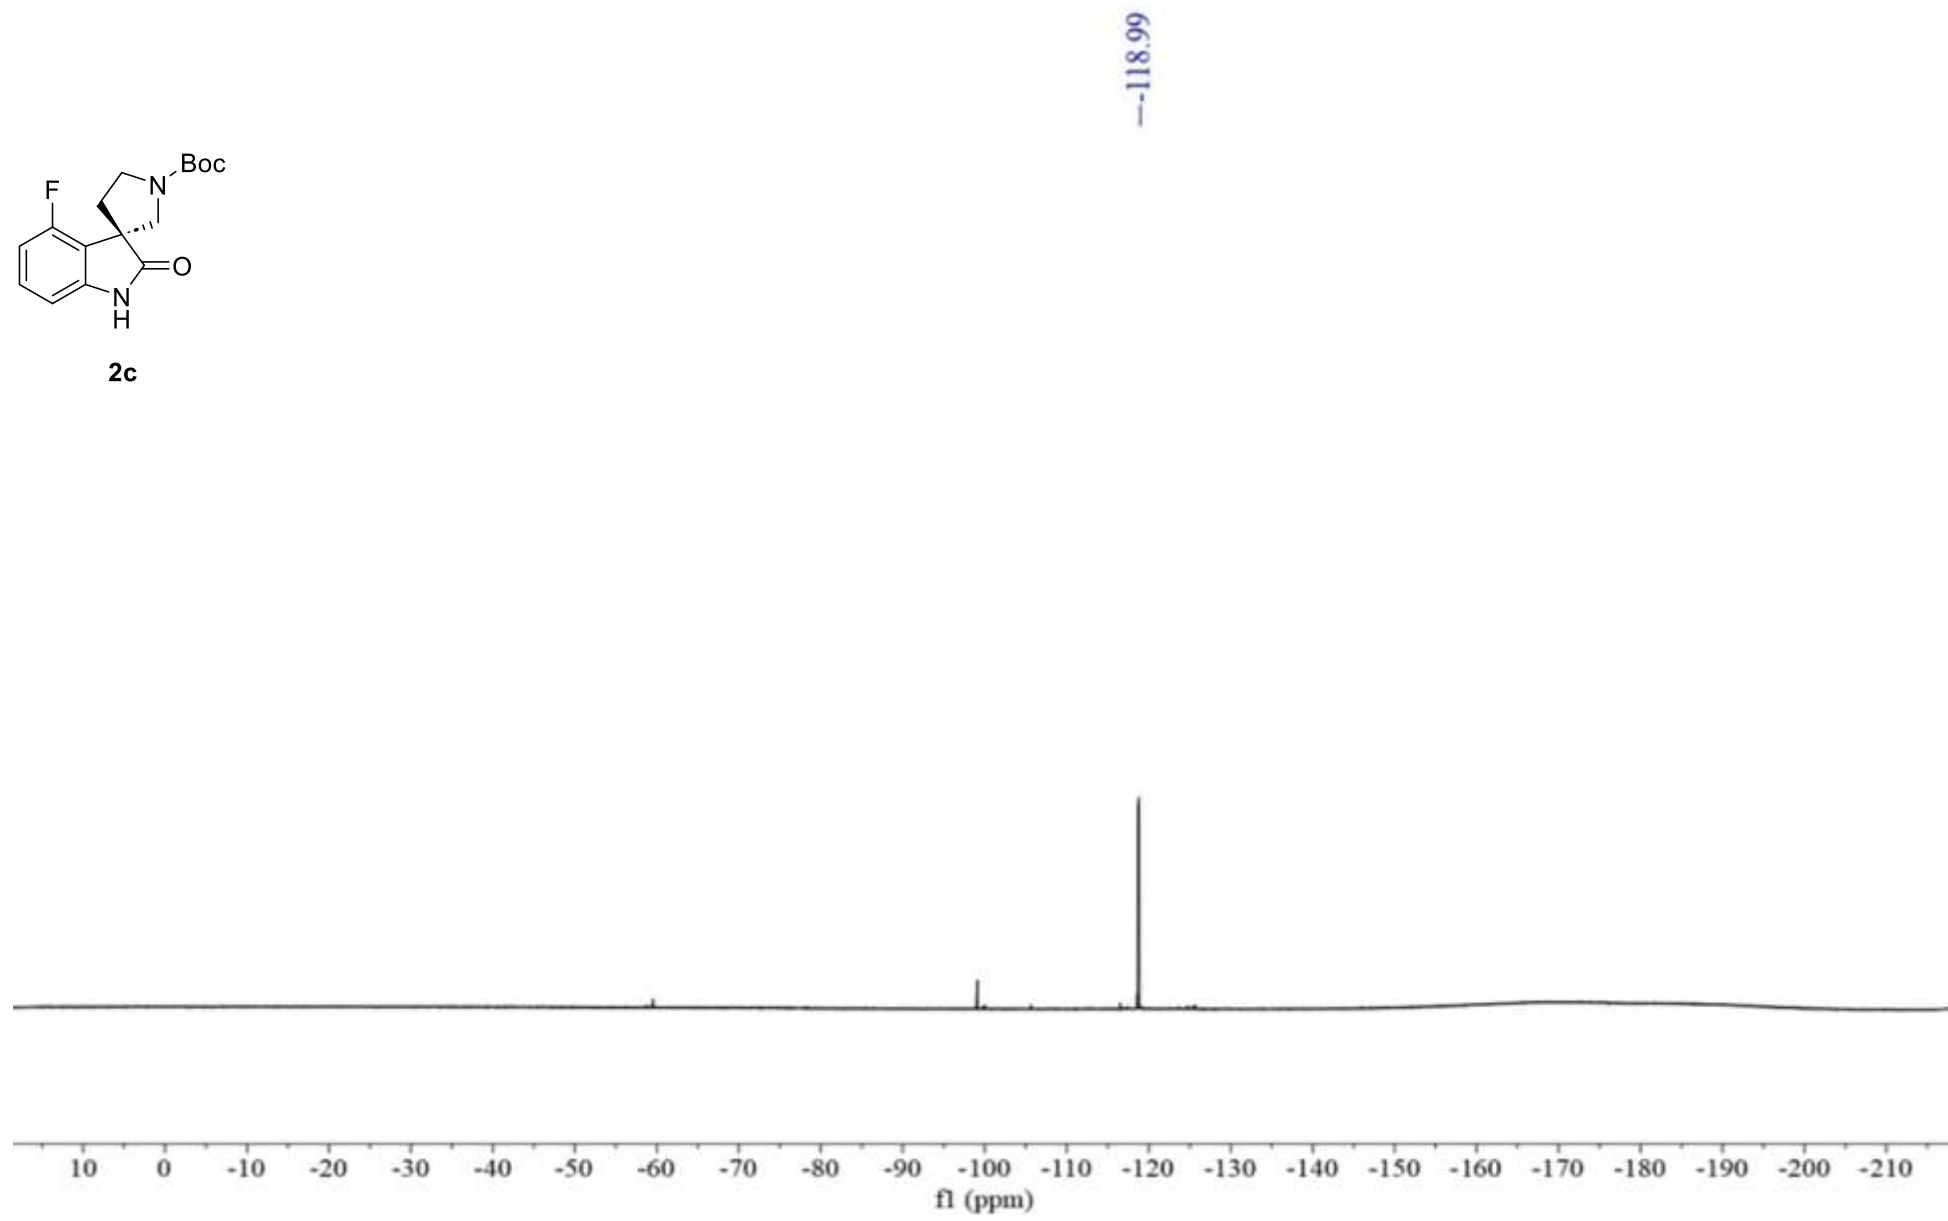

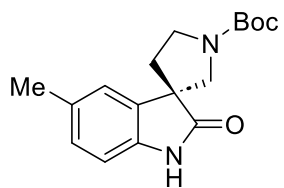

2d

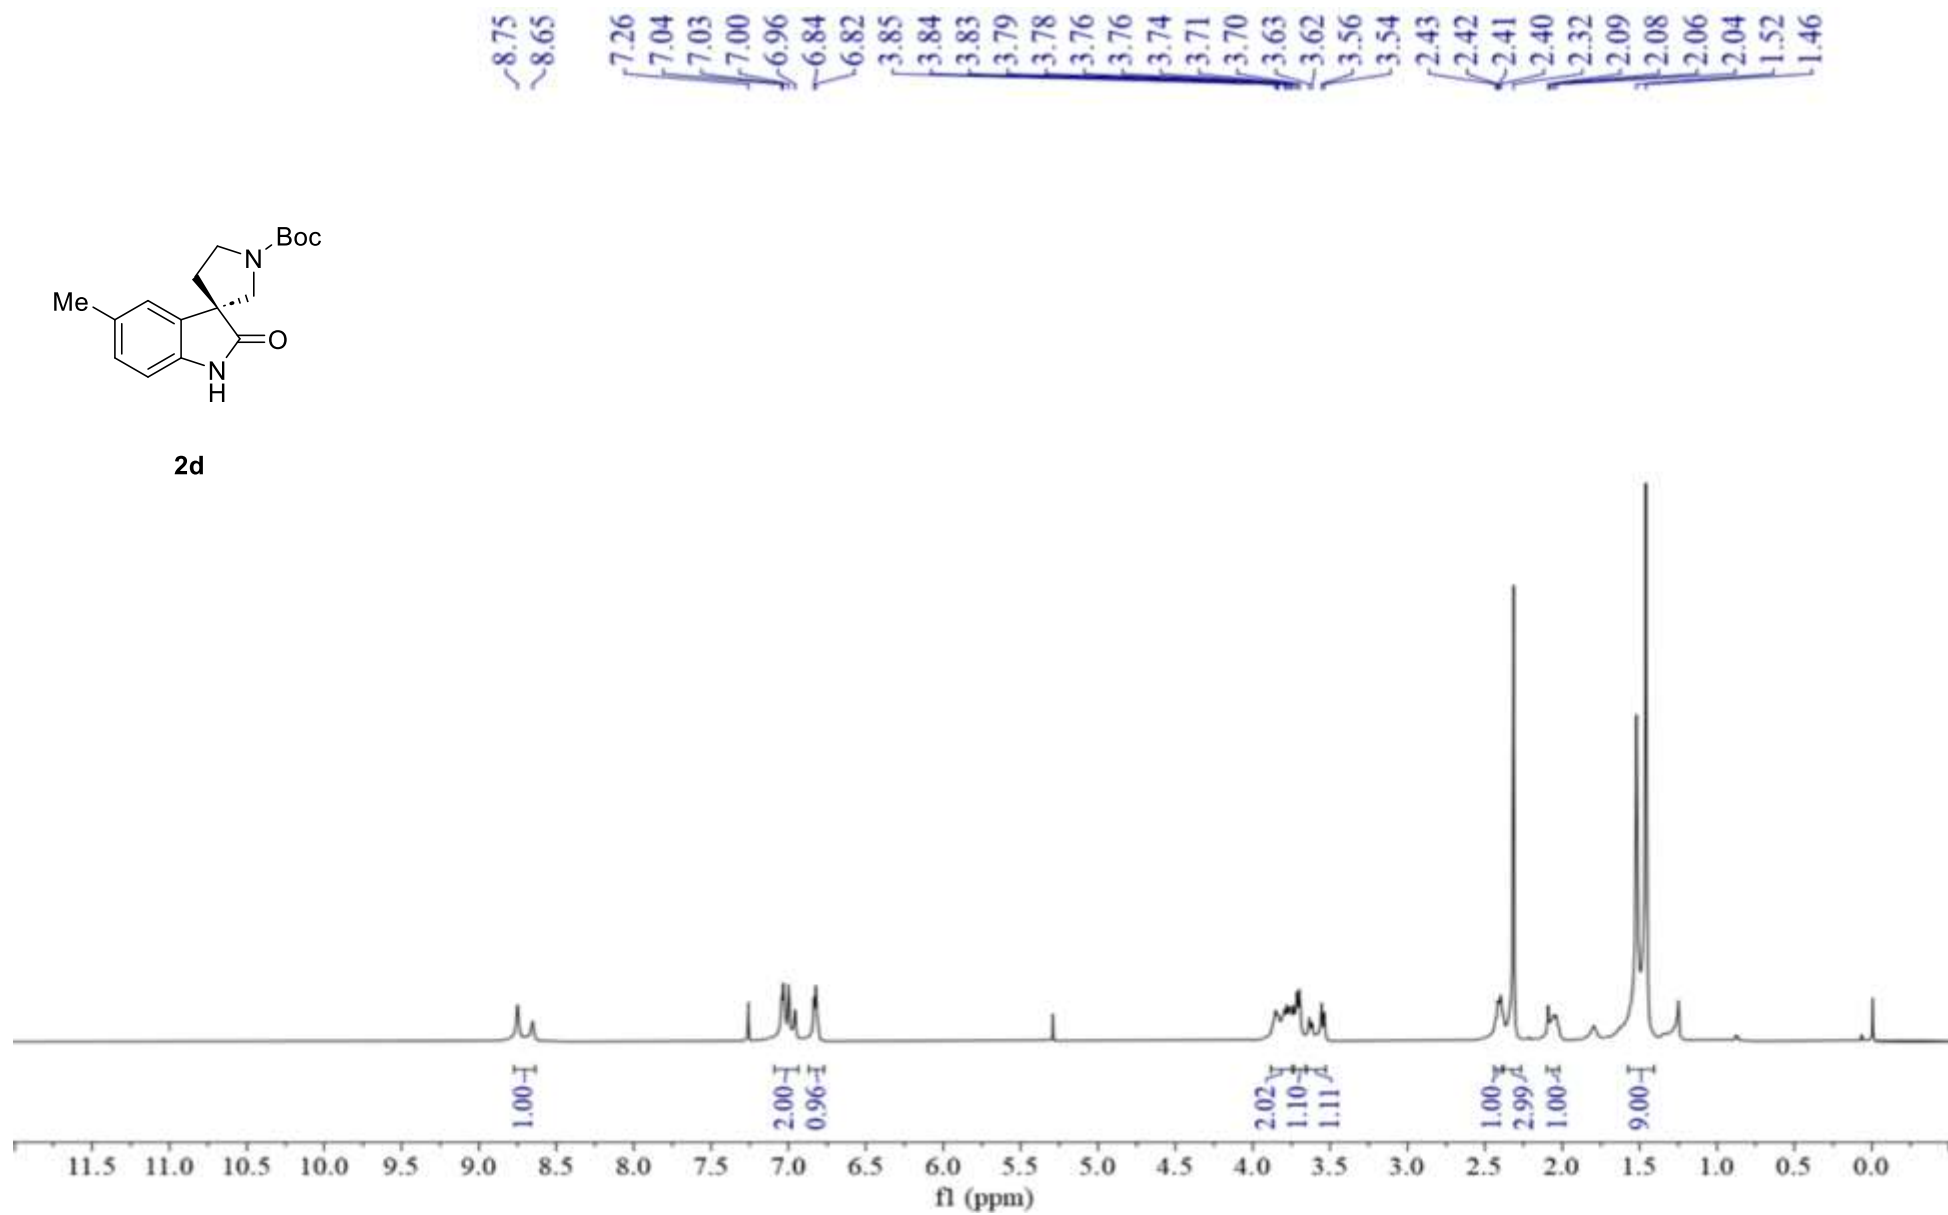

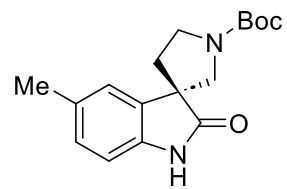

2d

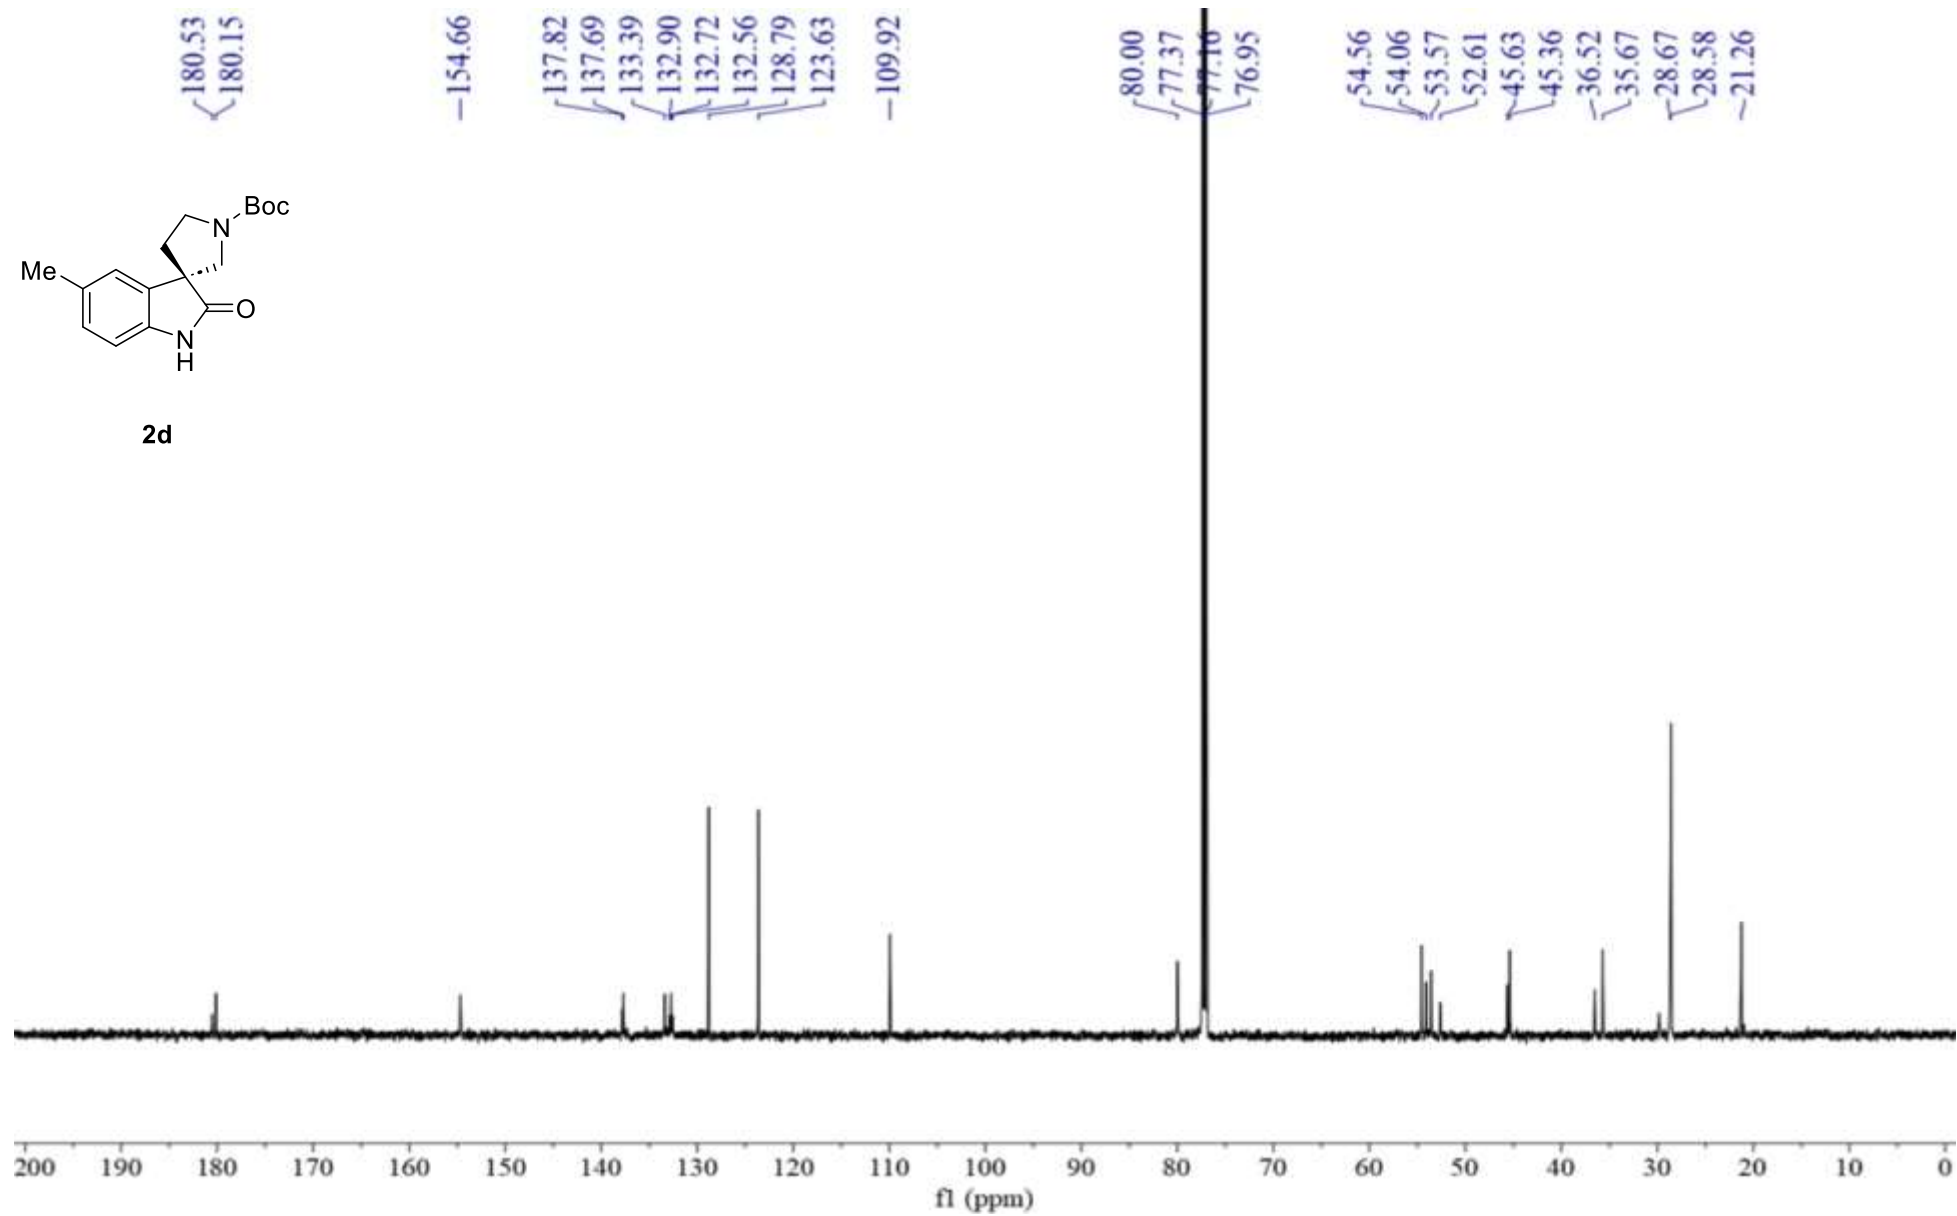

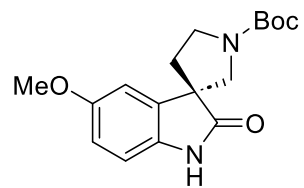

2e

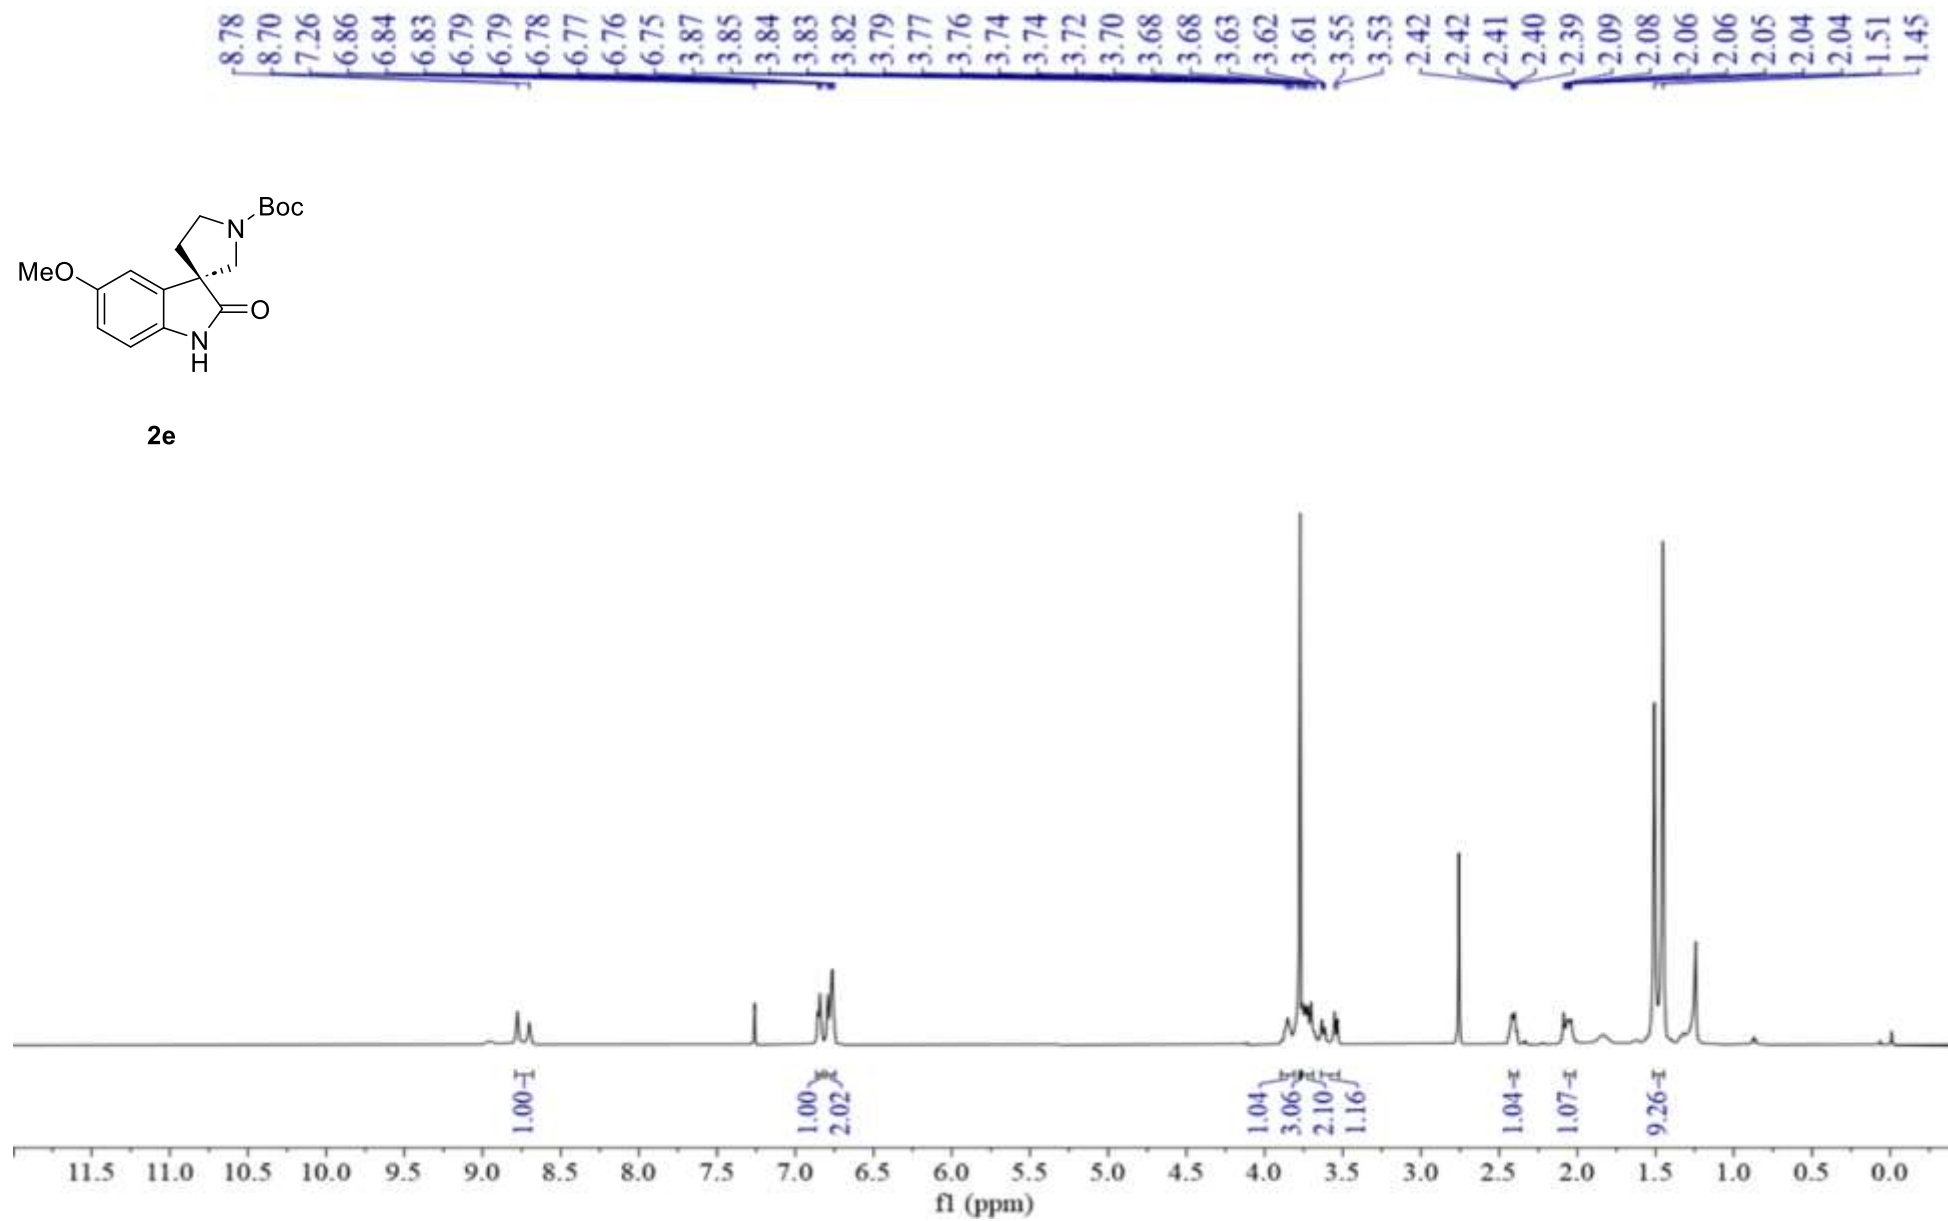

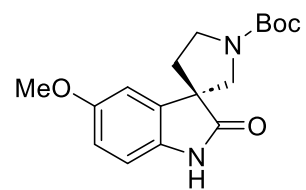

2e

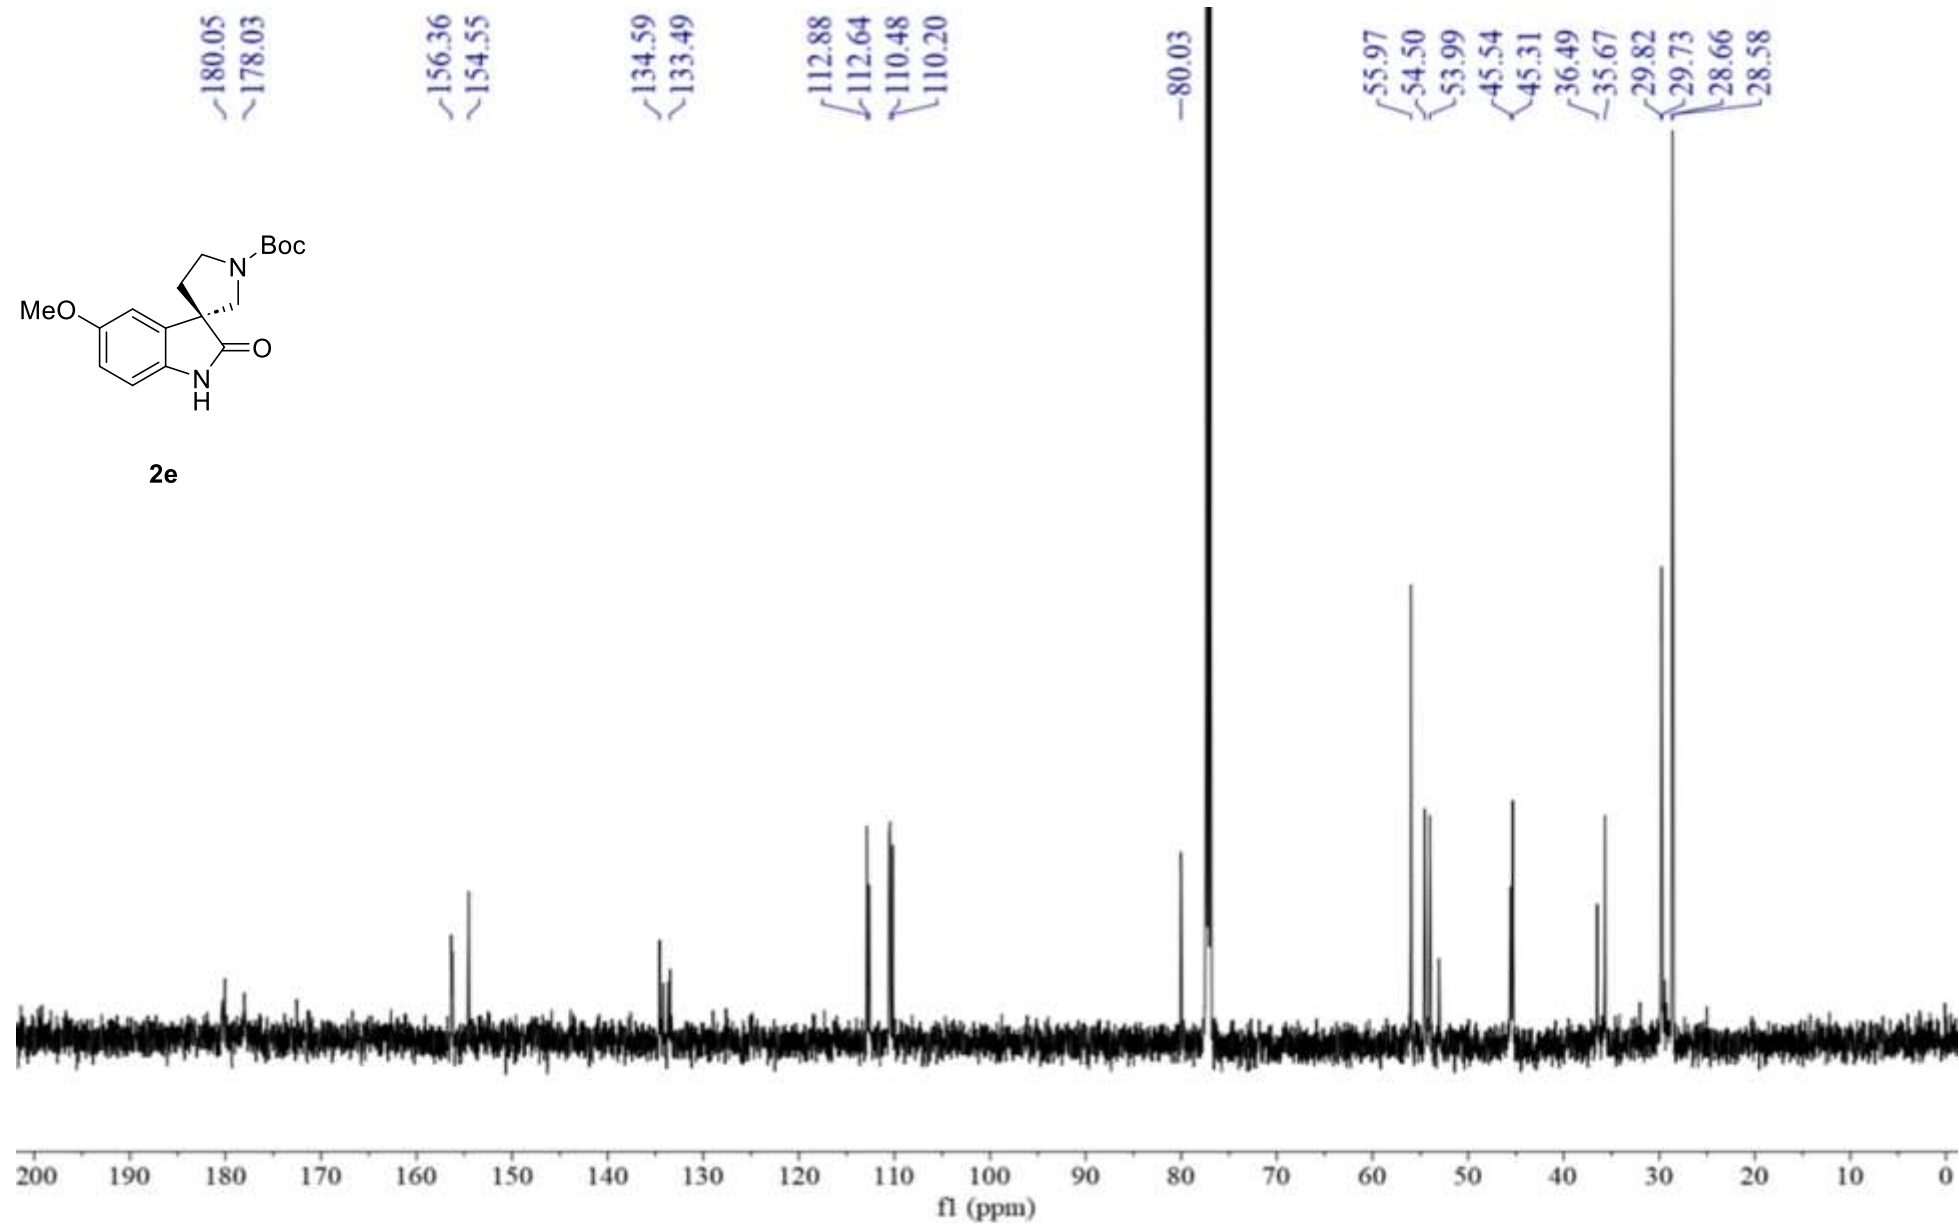

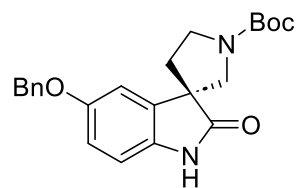

2f

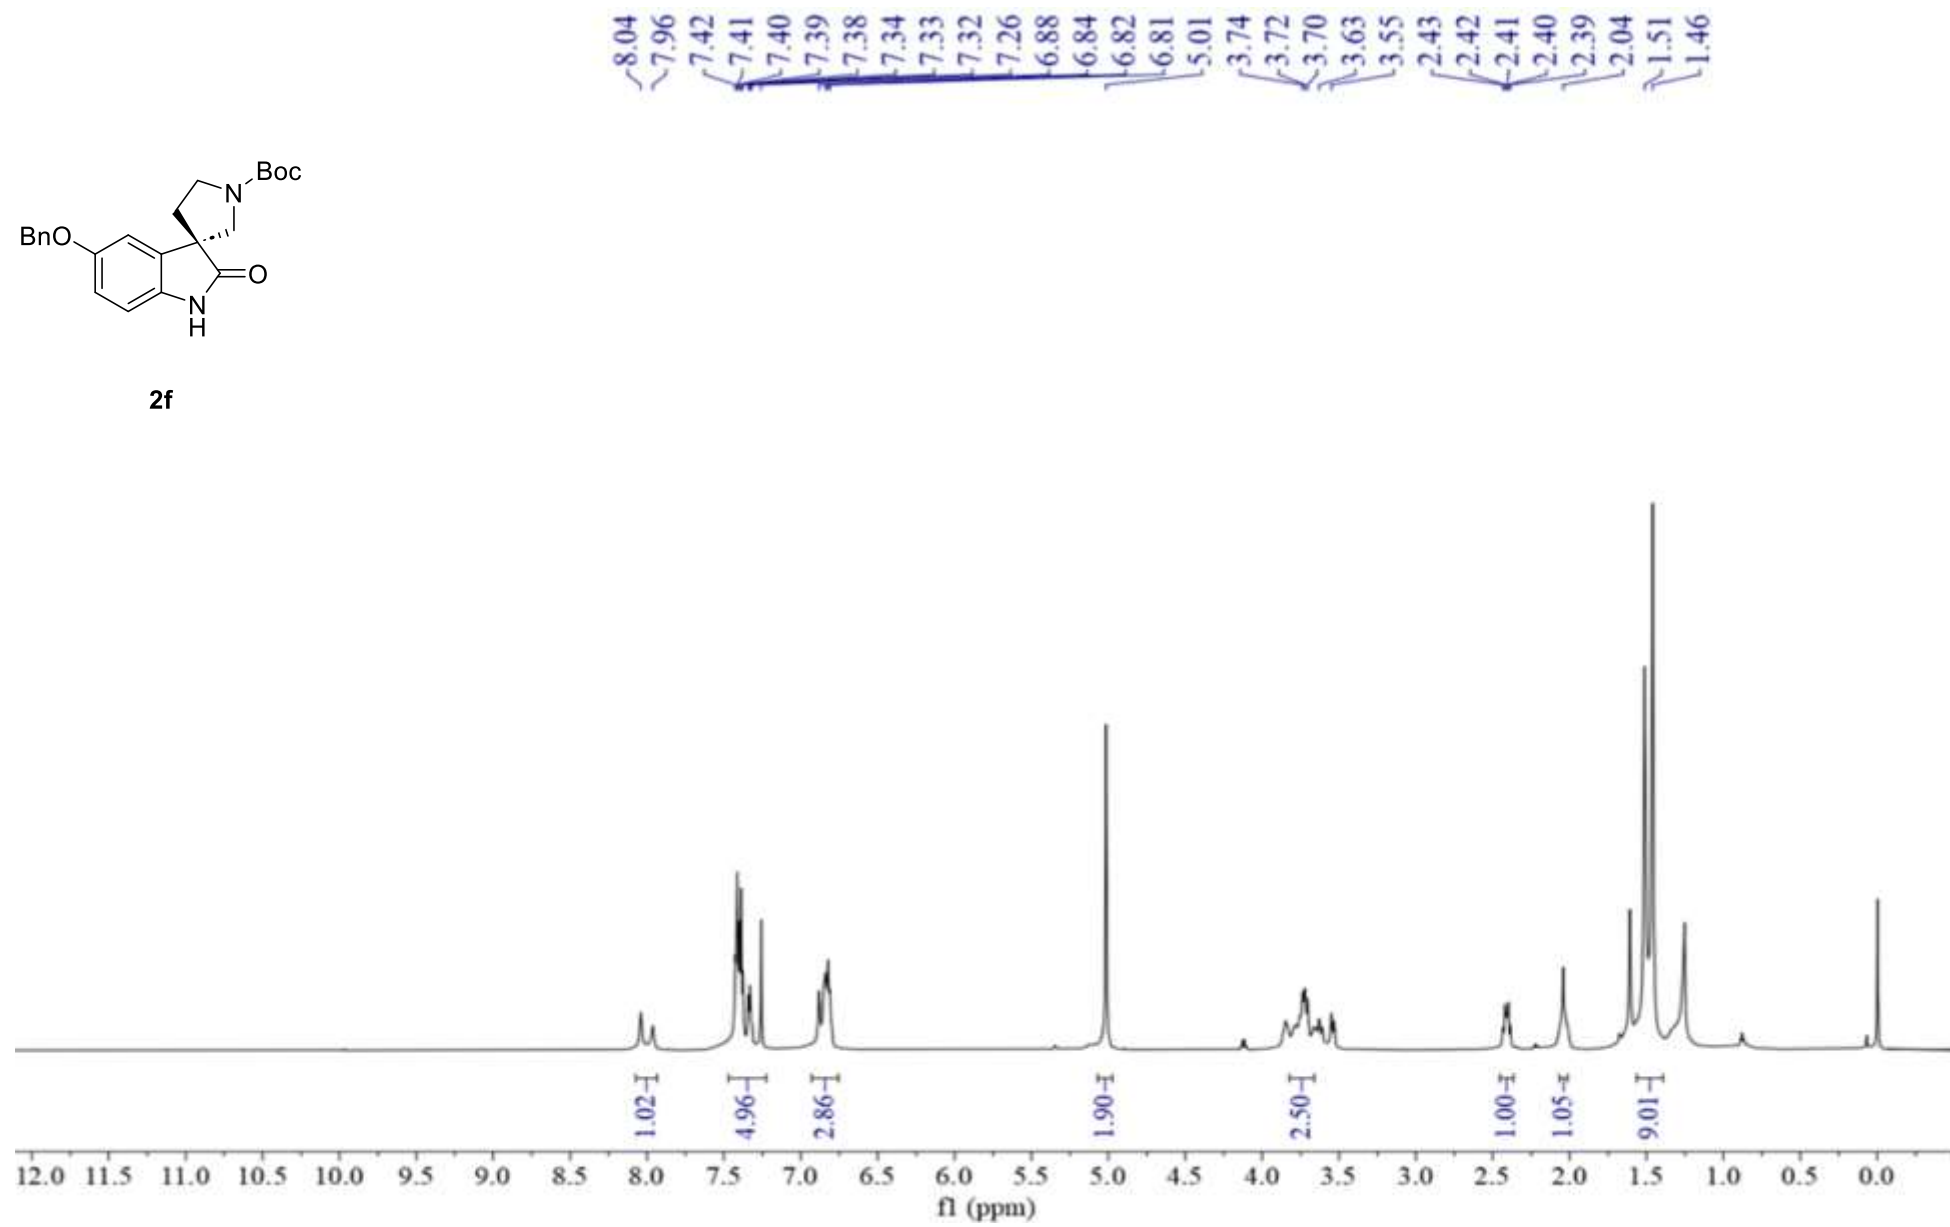

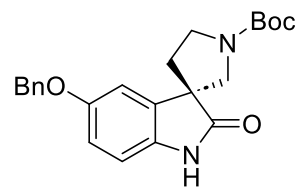

2f

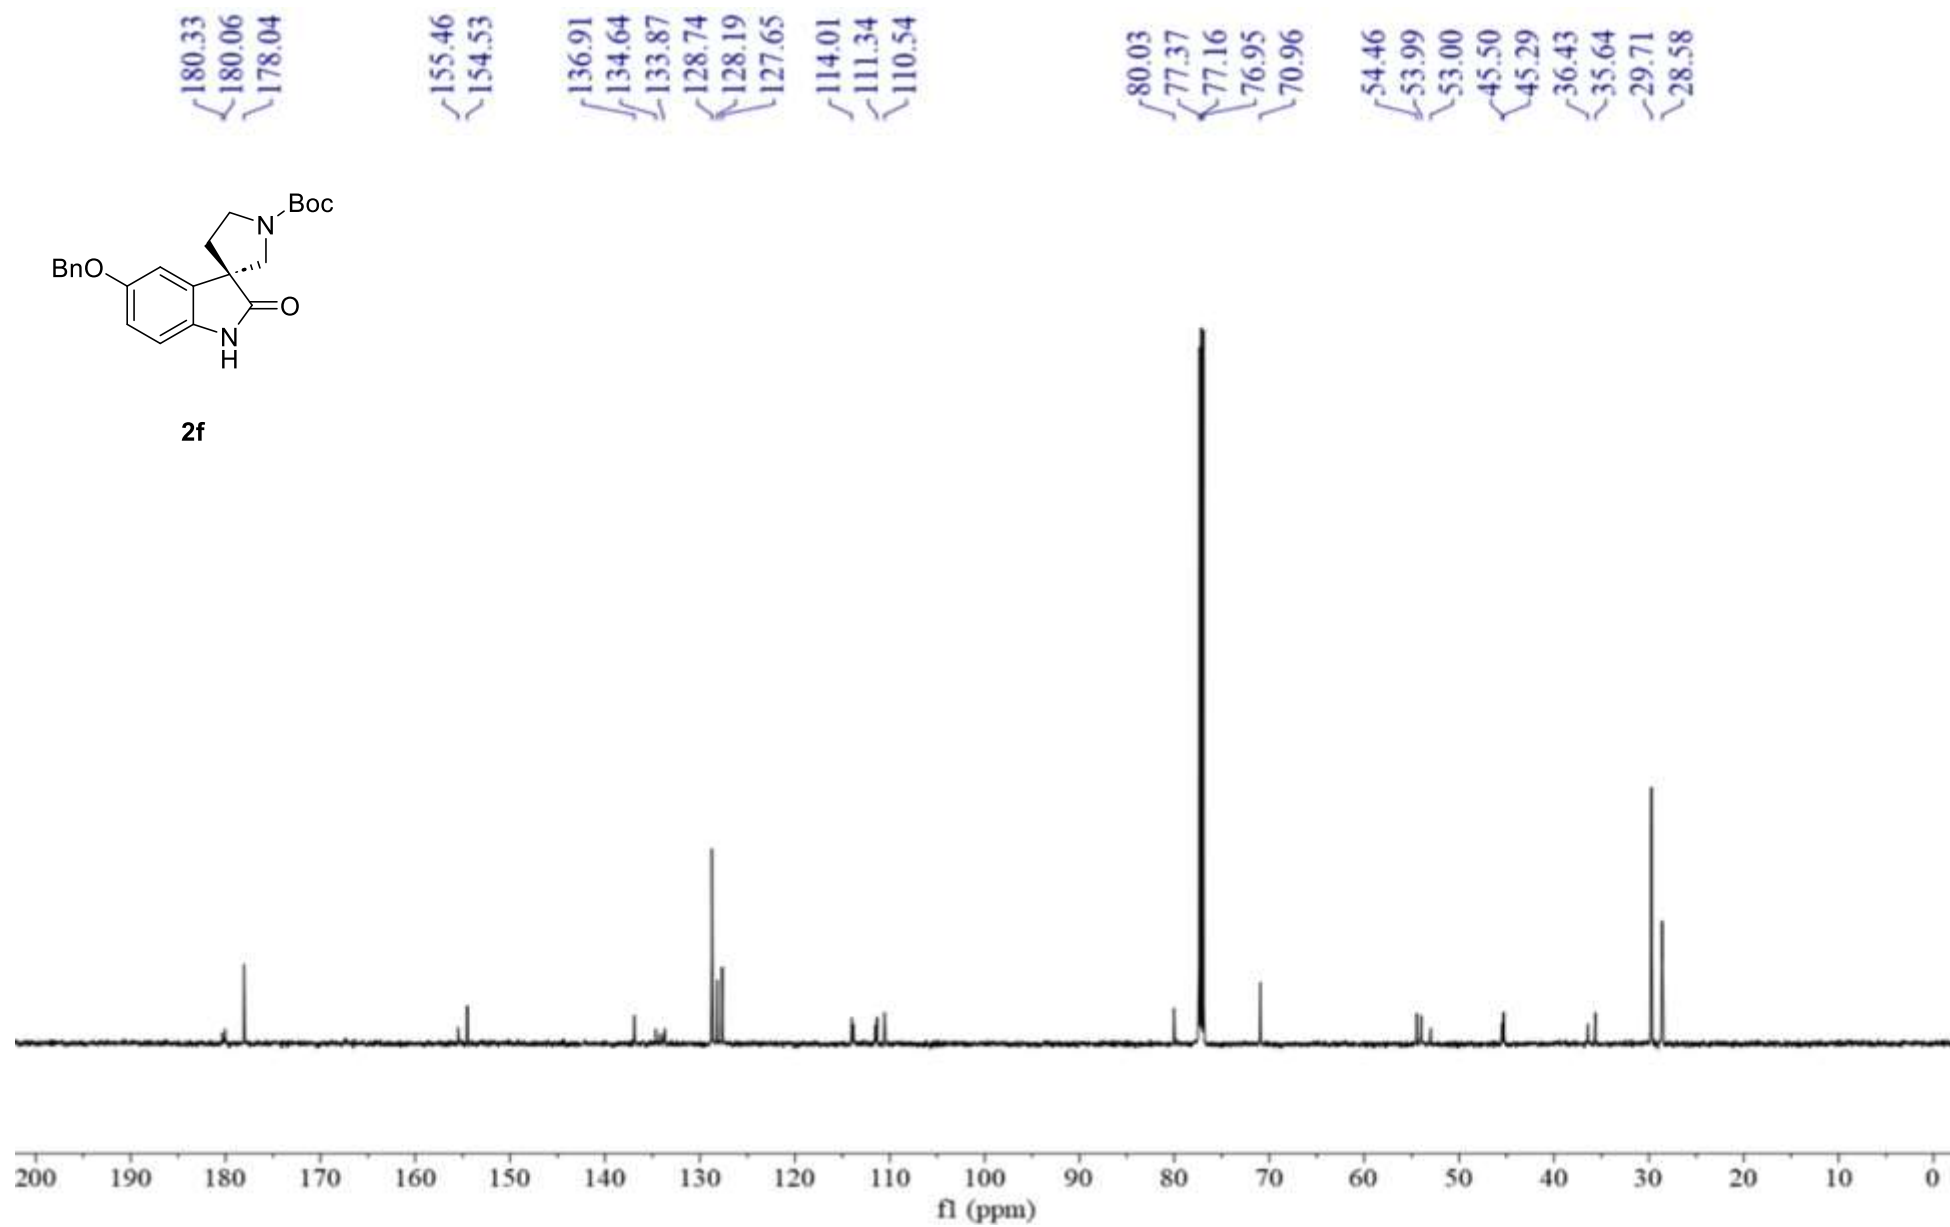

9.24  
9.18  
7.26  
7.23  
7.21  
7.16  
7.12  
6.89  
6.89  
6.88  
6.87  
3.88  
3.86  
3.86  
3.85  
3.84  
3.81  
3.80  
3.80  
3.79  
3.77  
3.76  
3.75  
3.74  
3.73  
3.72  
3.70  
3.68  
3.64  
3.62  
3.56  
3.54  
2.44  
2.42  
2.42  
2.41  
2.40  
2.39  
2.10  
2.09  
2.08  
2.07  
2.06  
2.05  
2.04  
2.04  
1.54  
1.52  
1.46

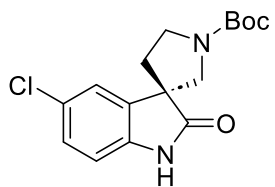

2g

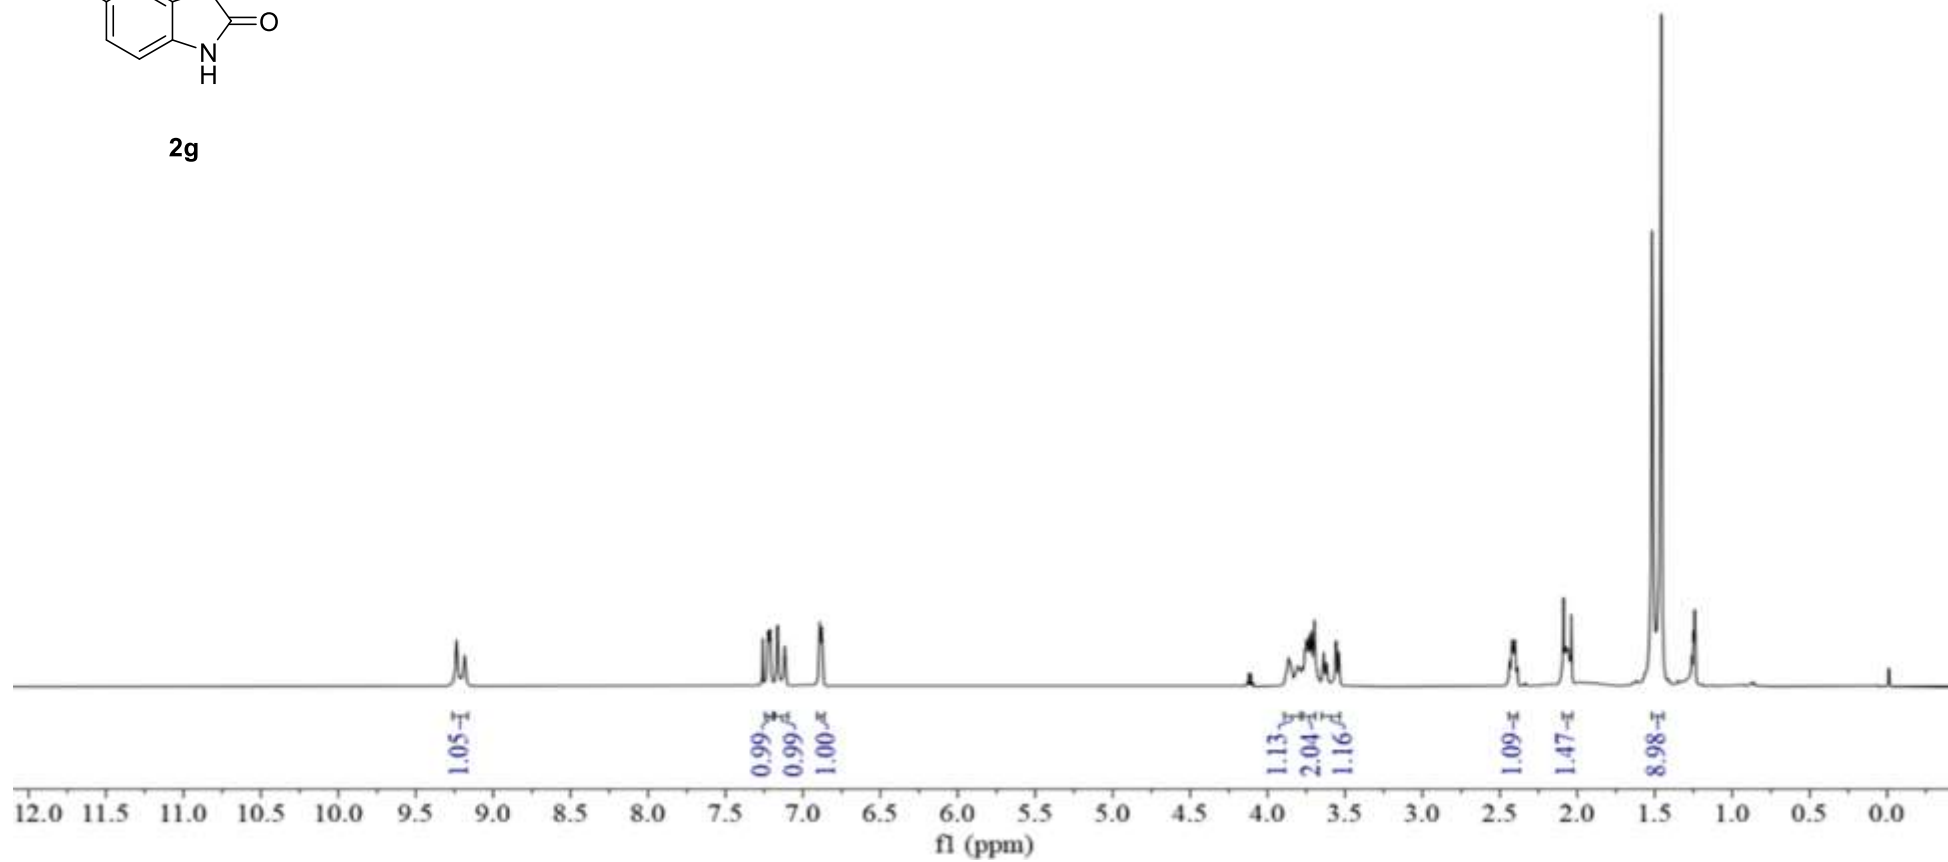

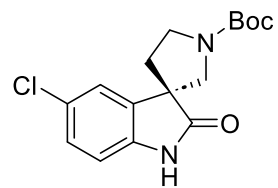

2g

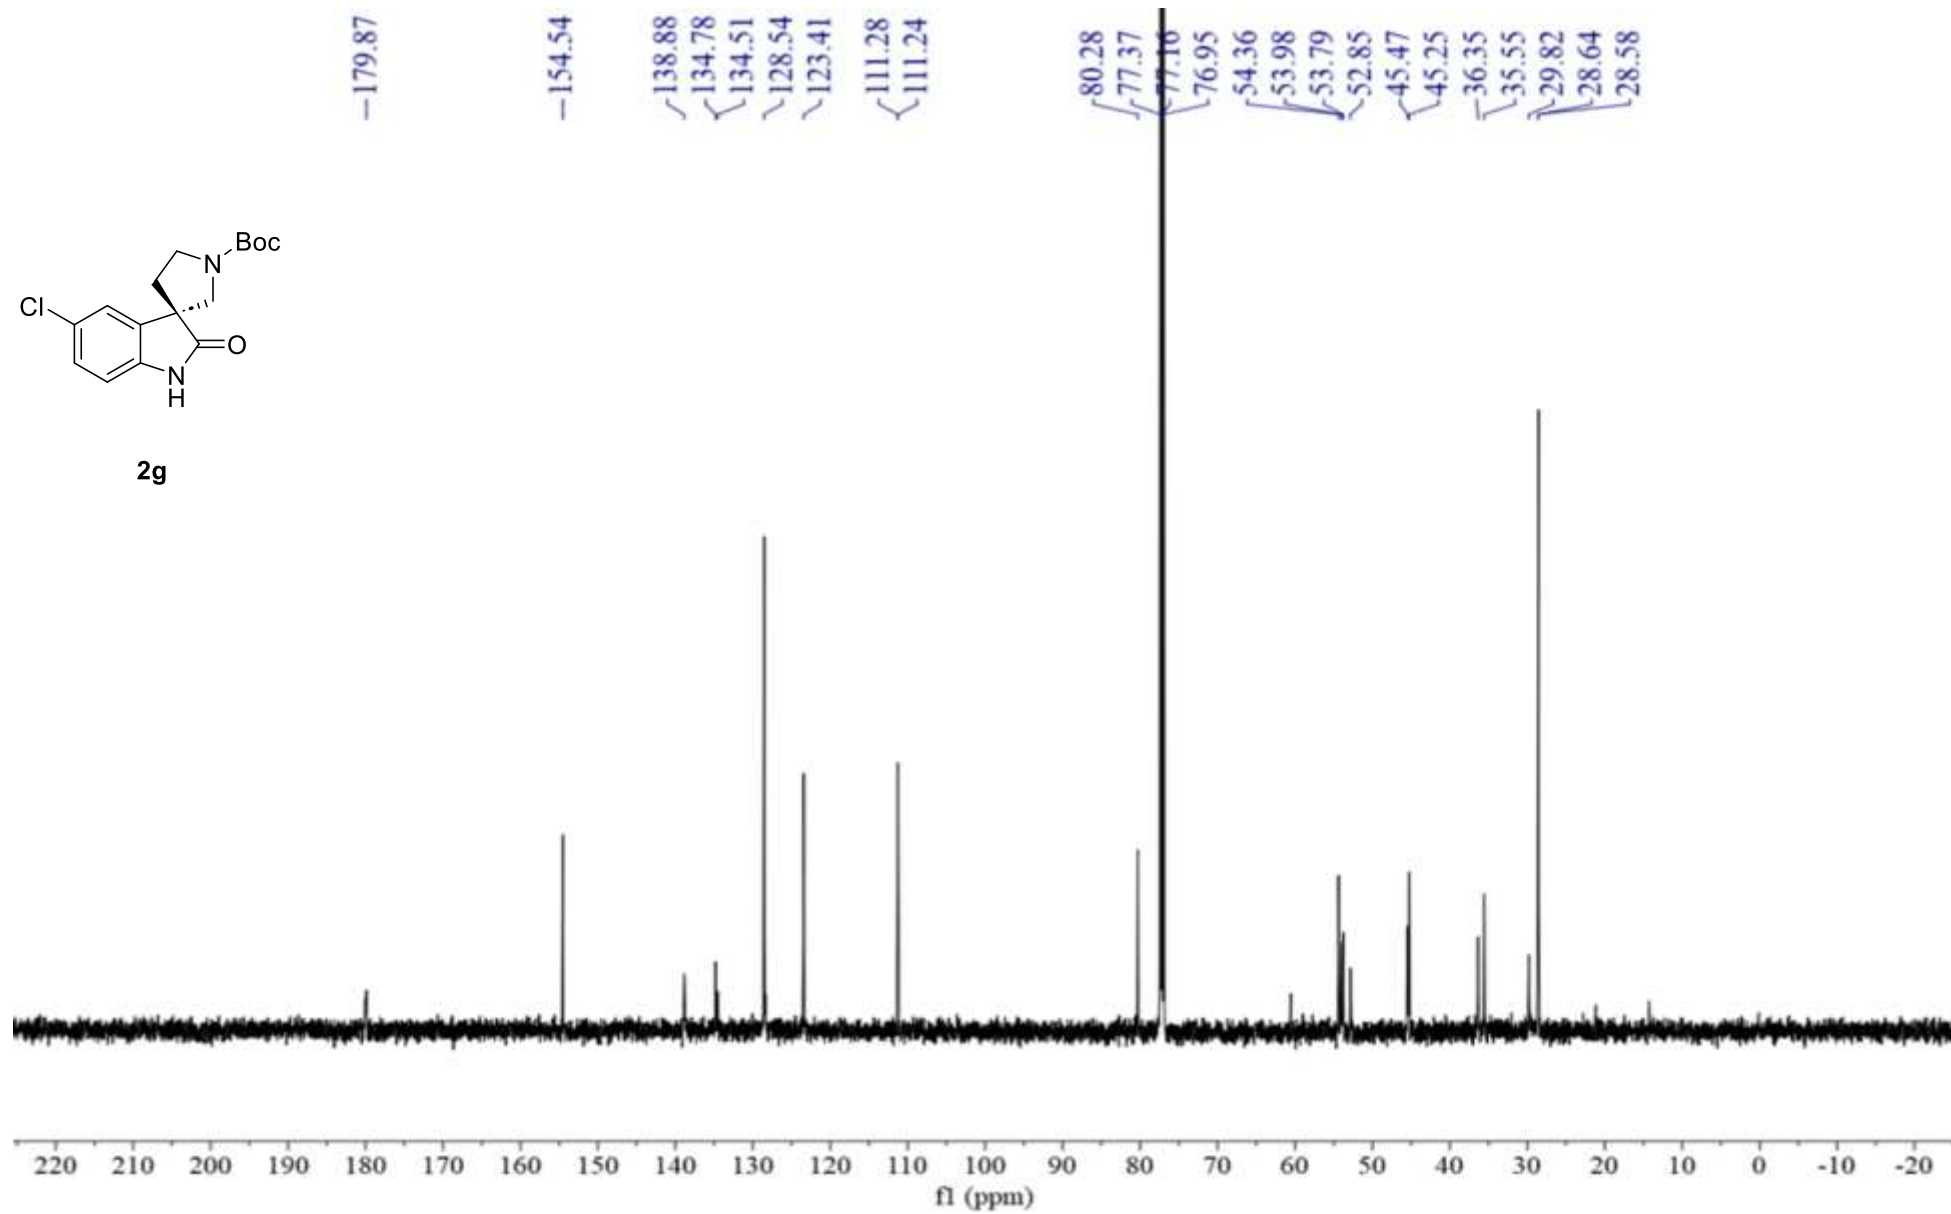

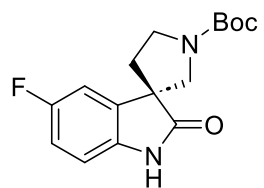

2h

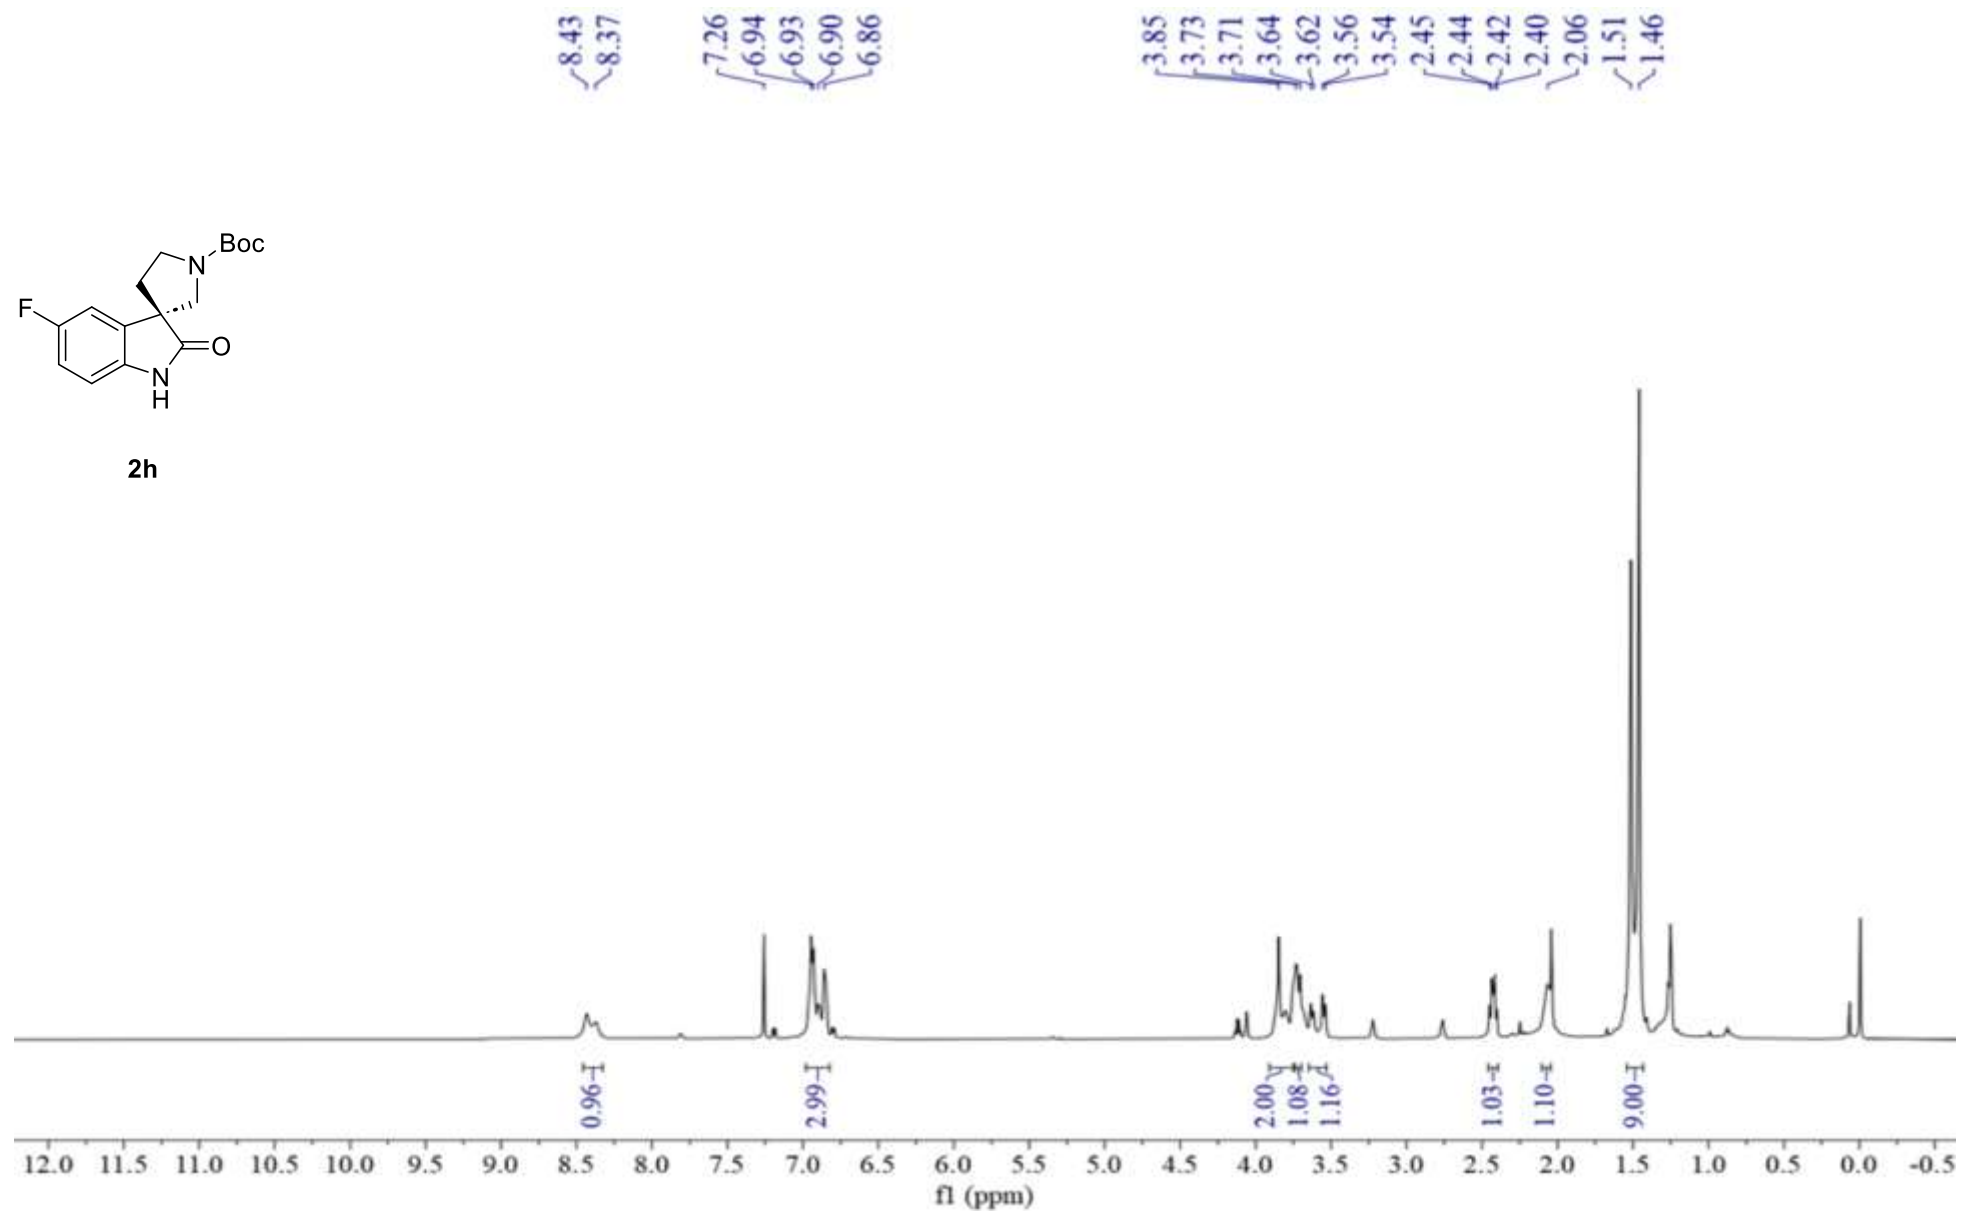

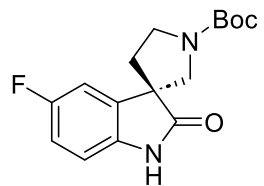

2h

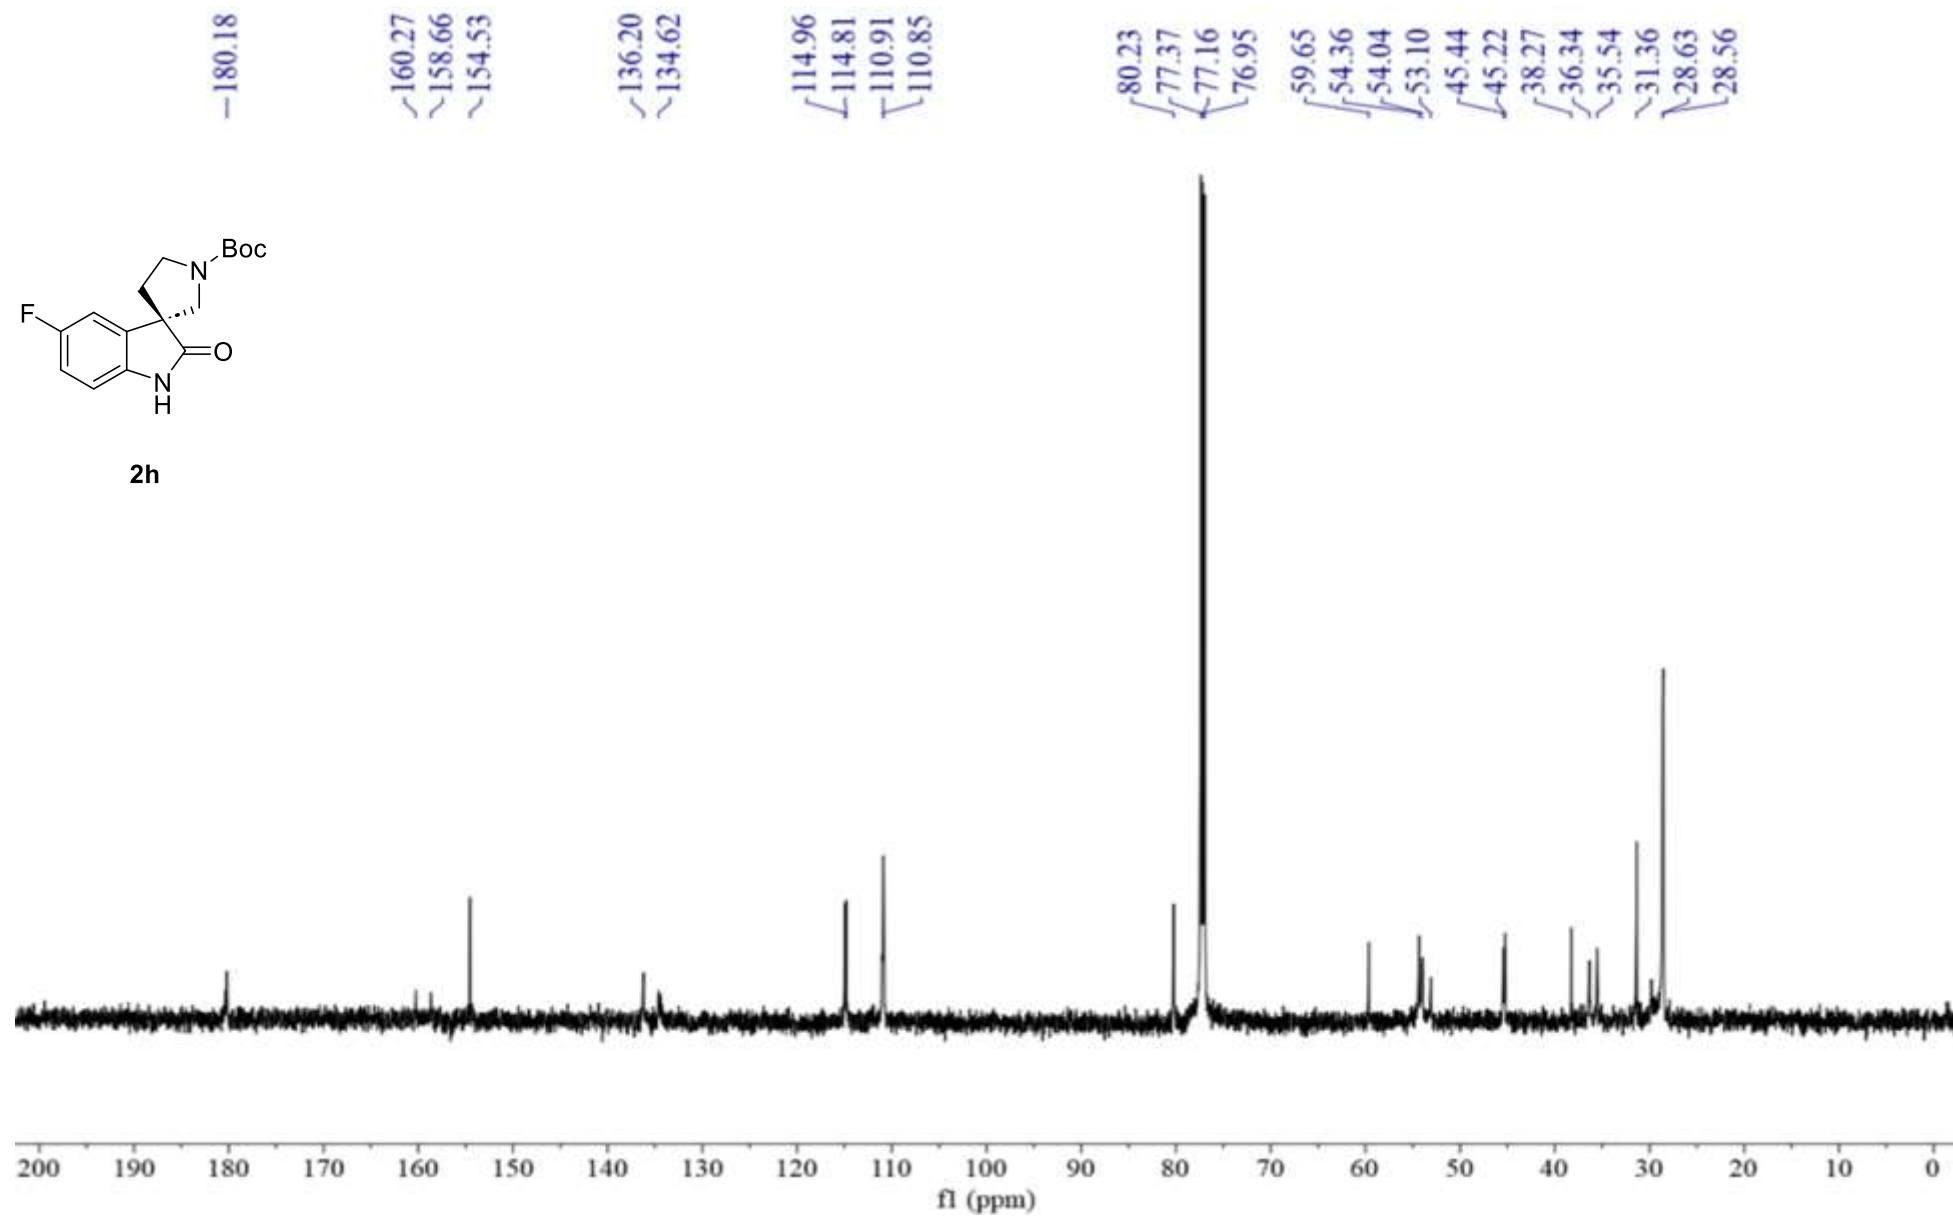

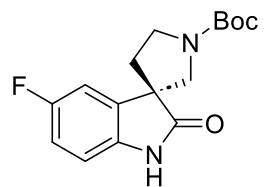

2h

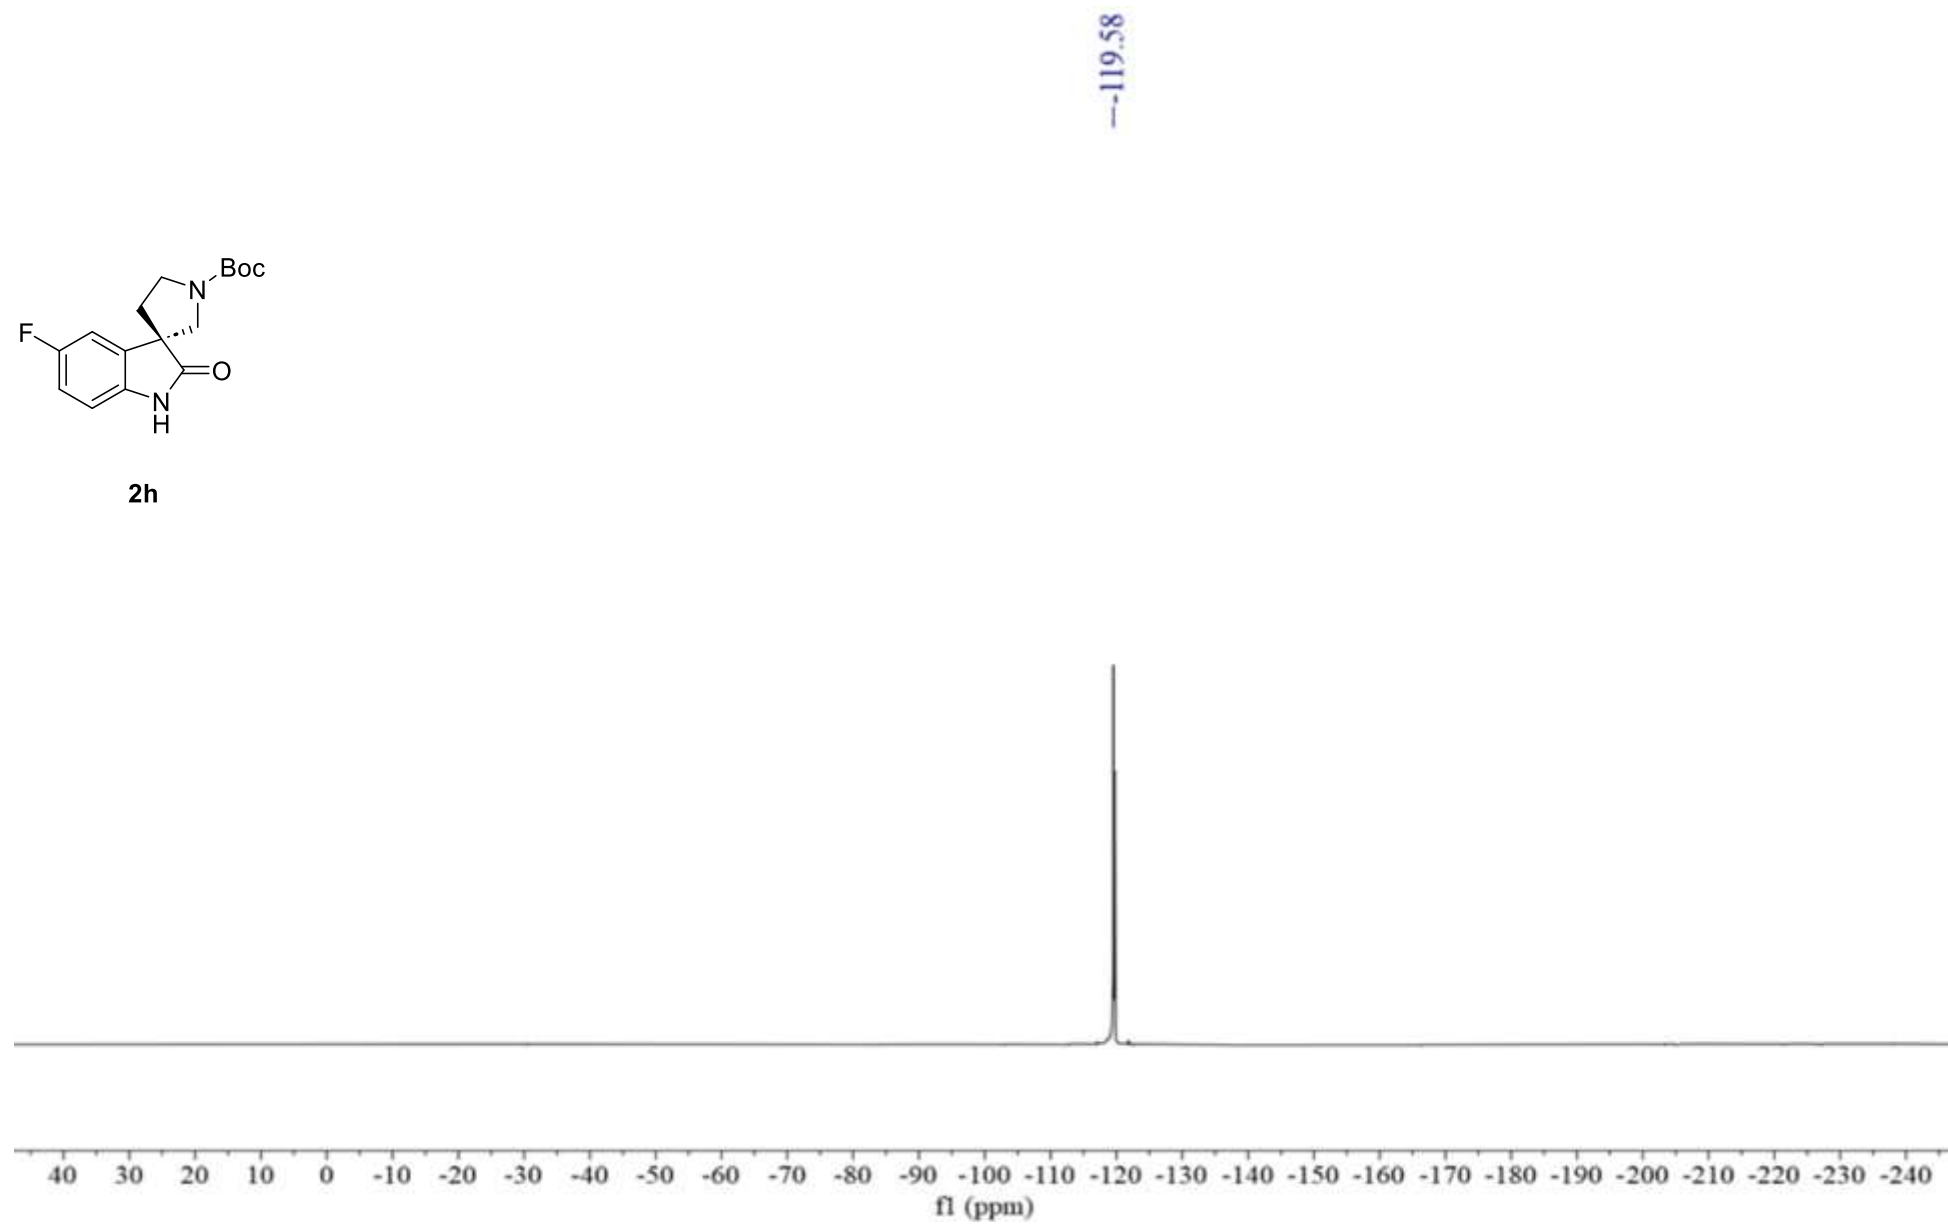

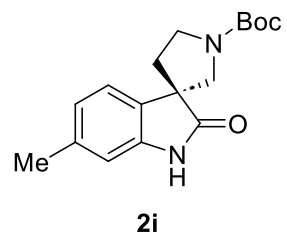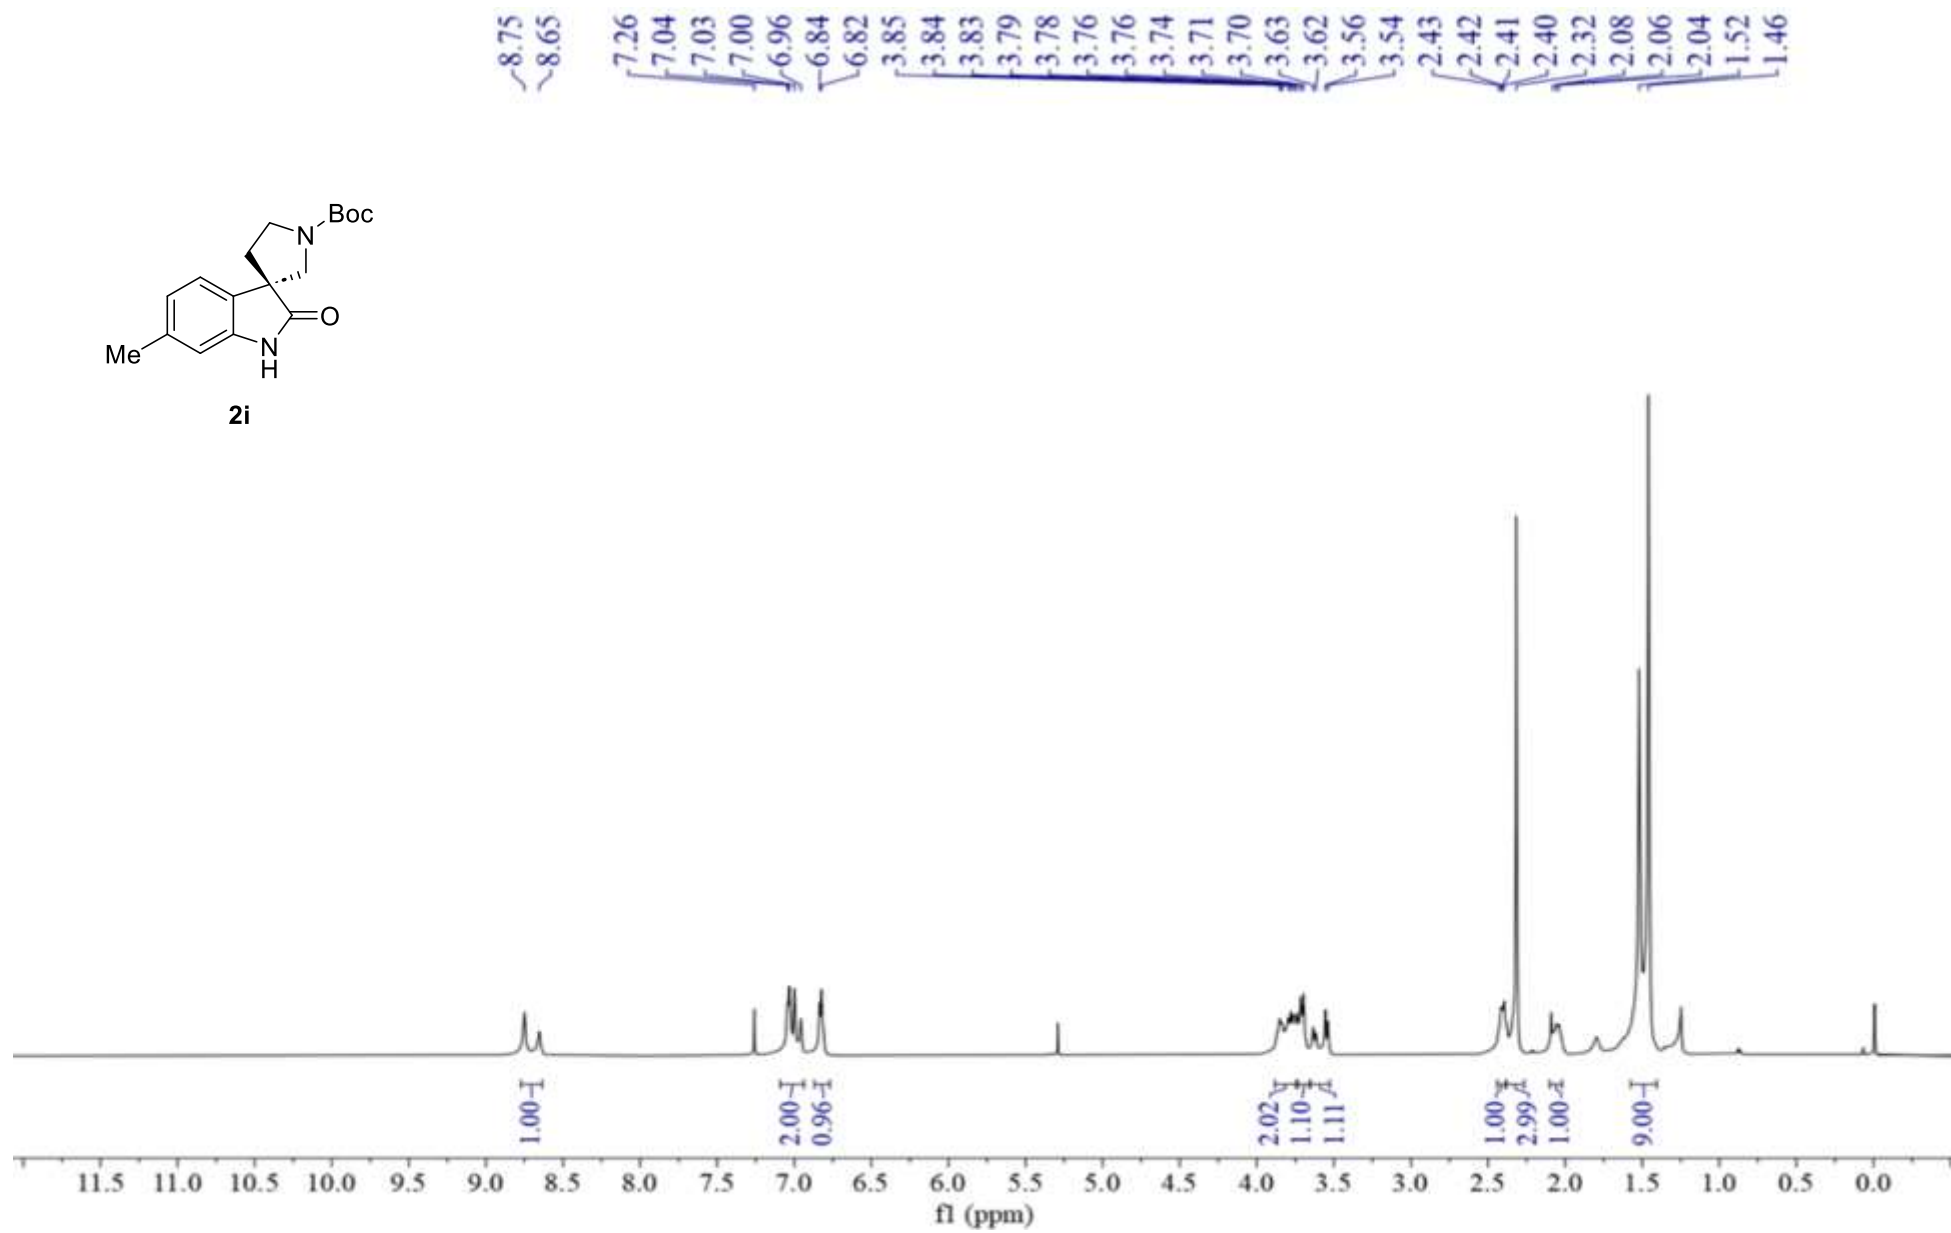

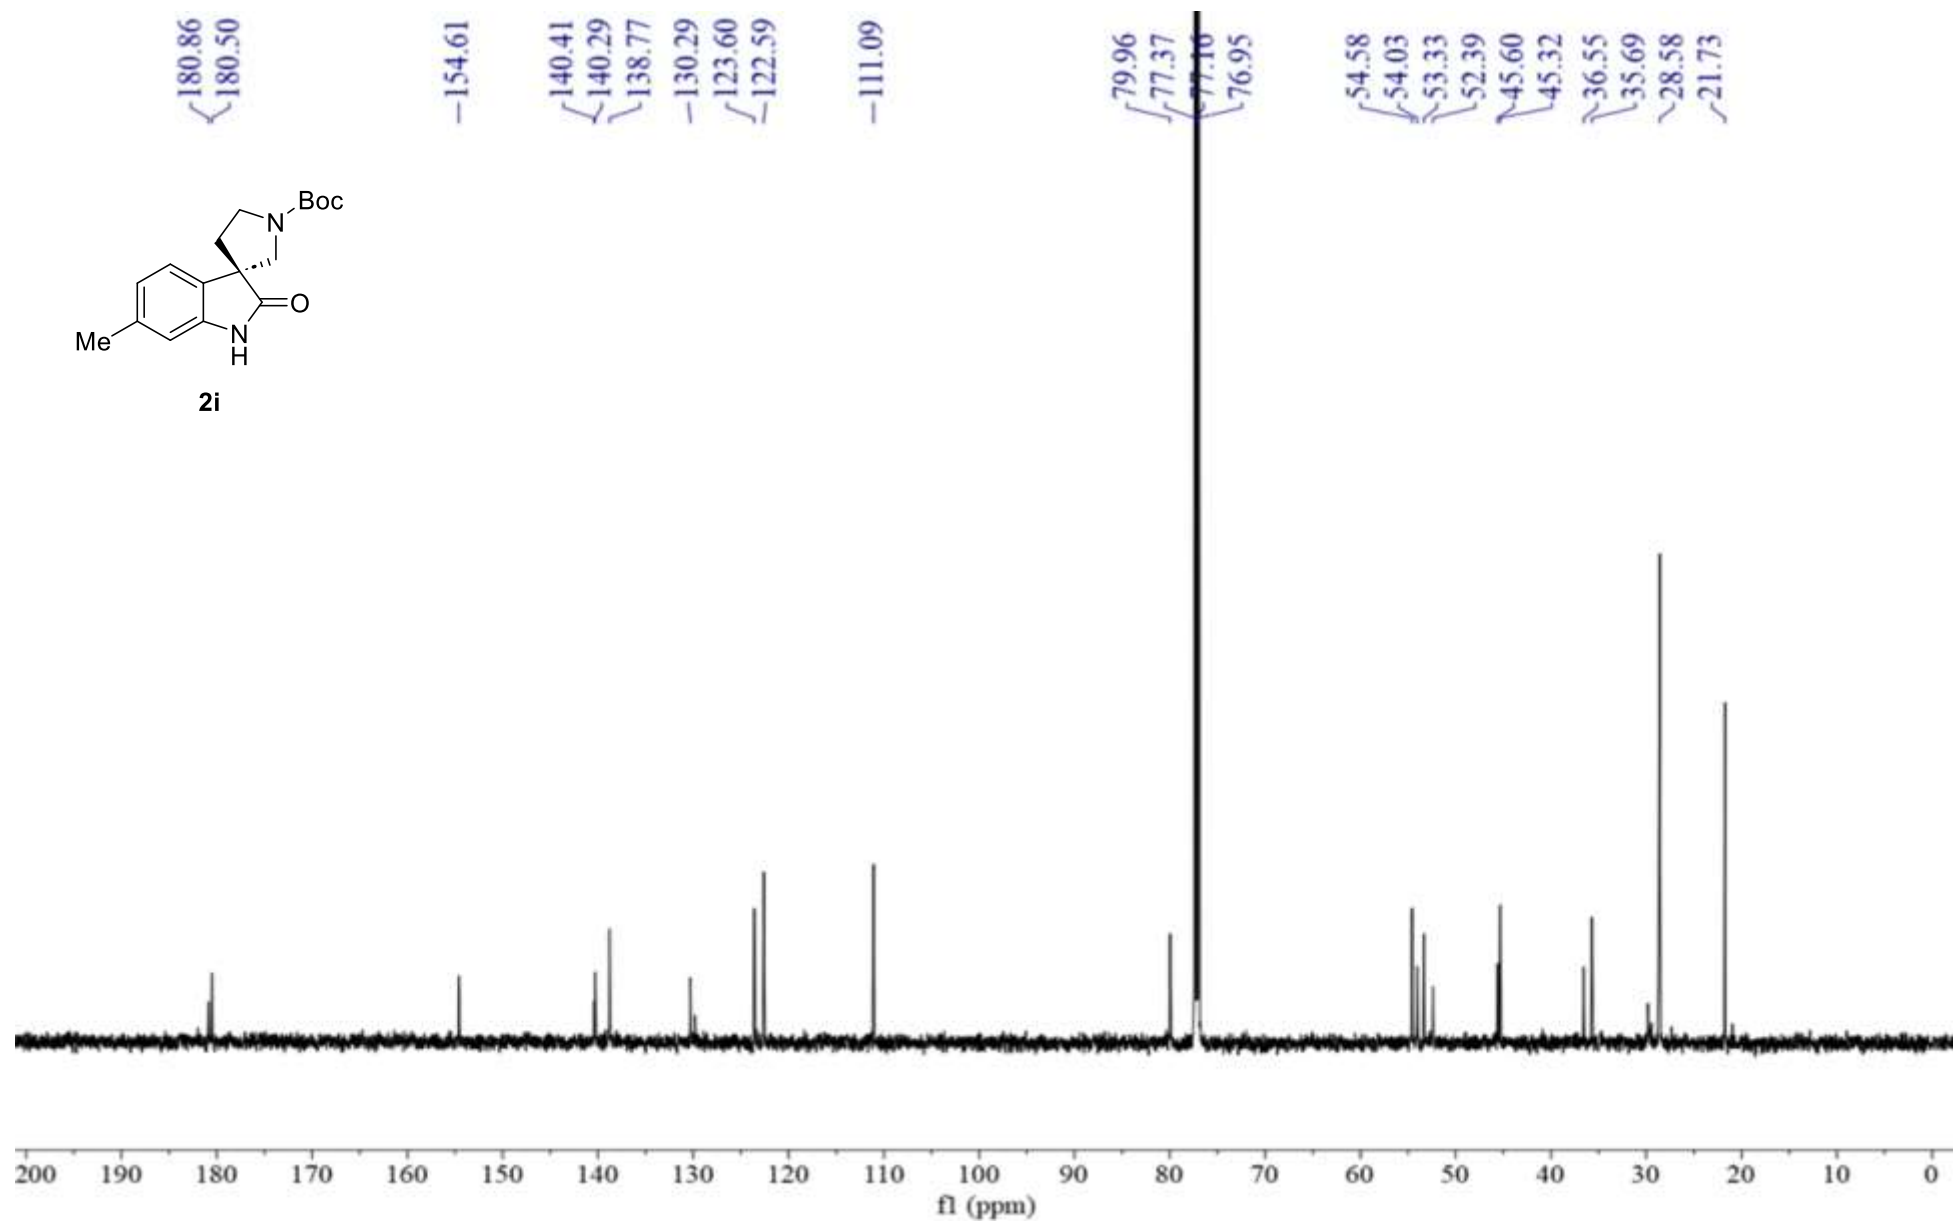

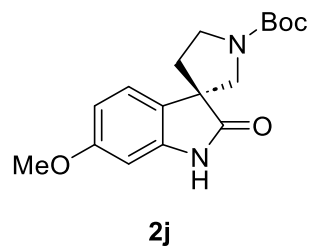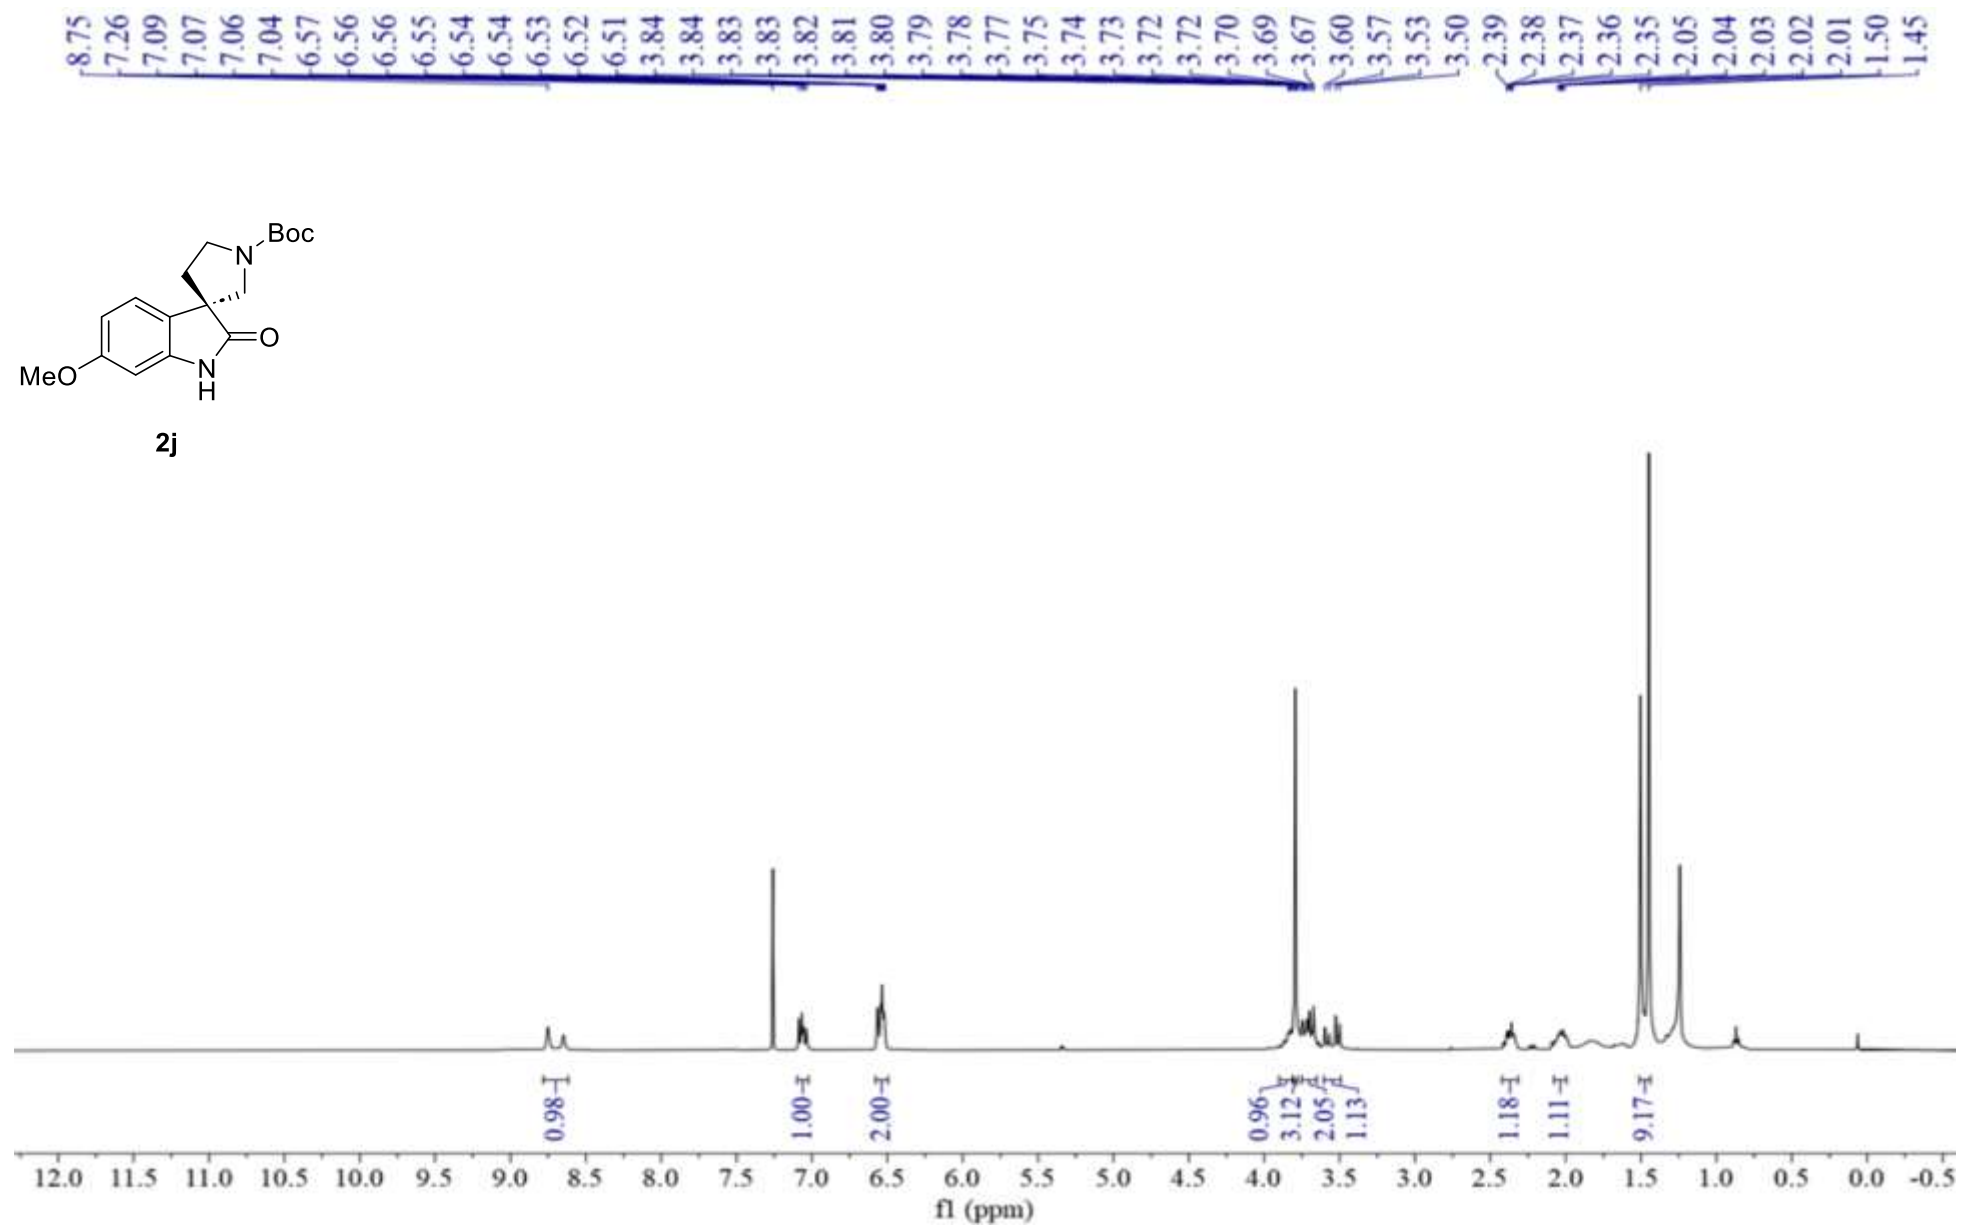

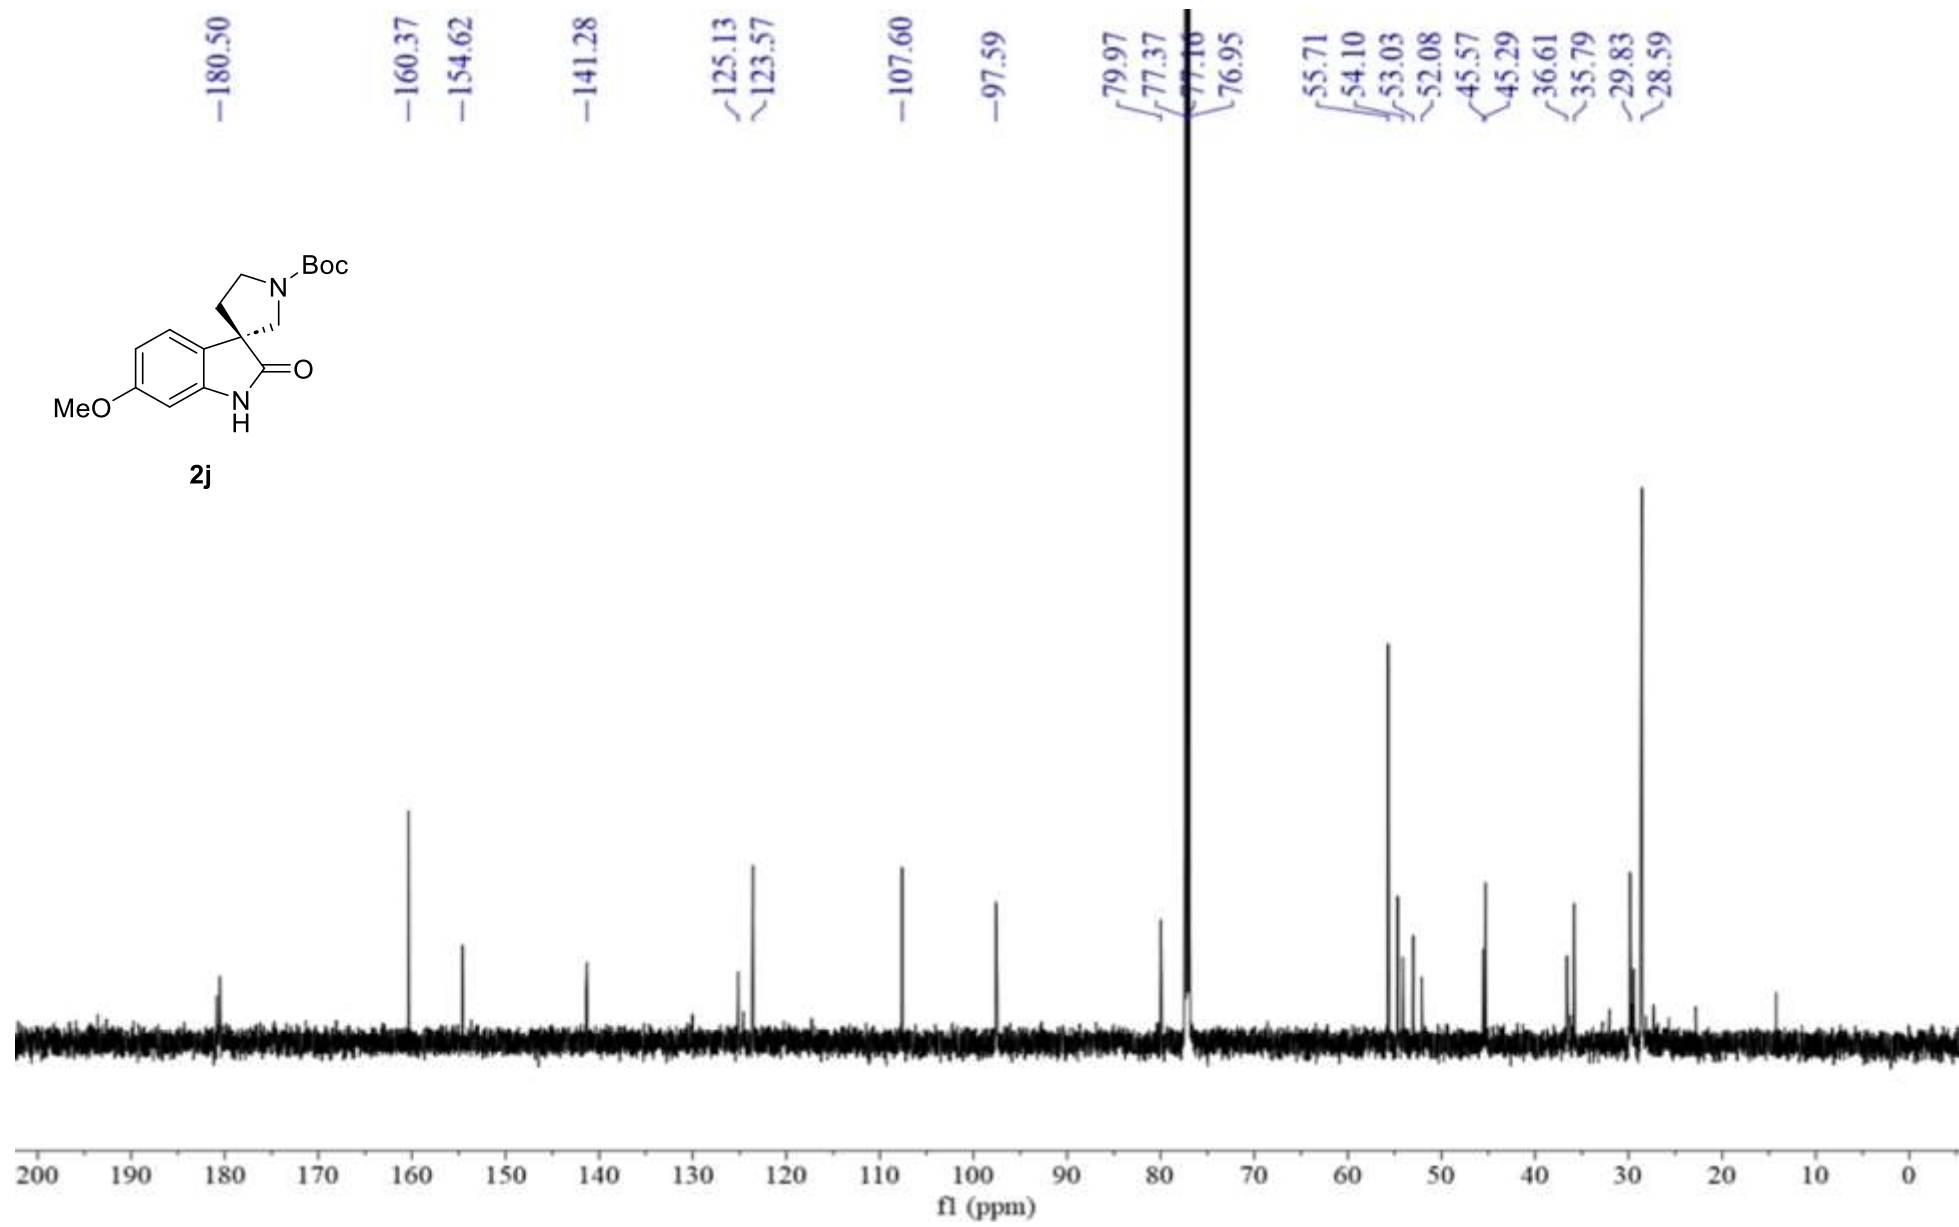

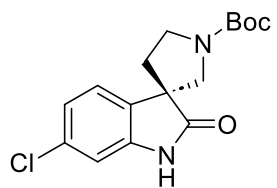

2k

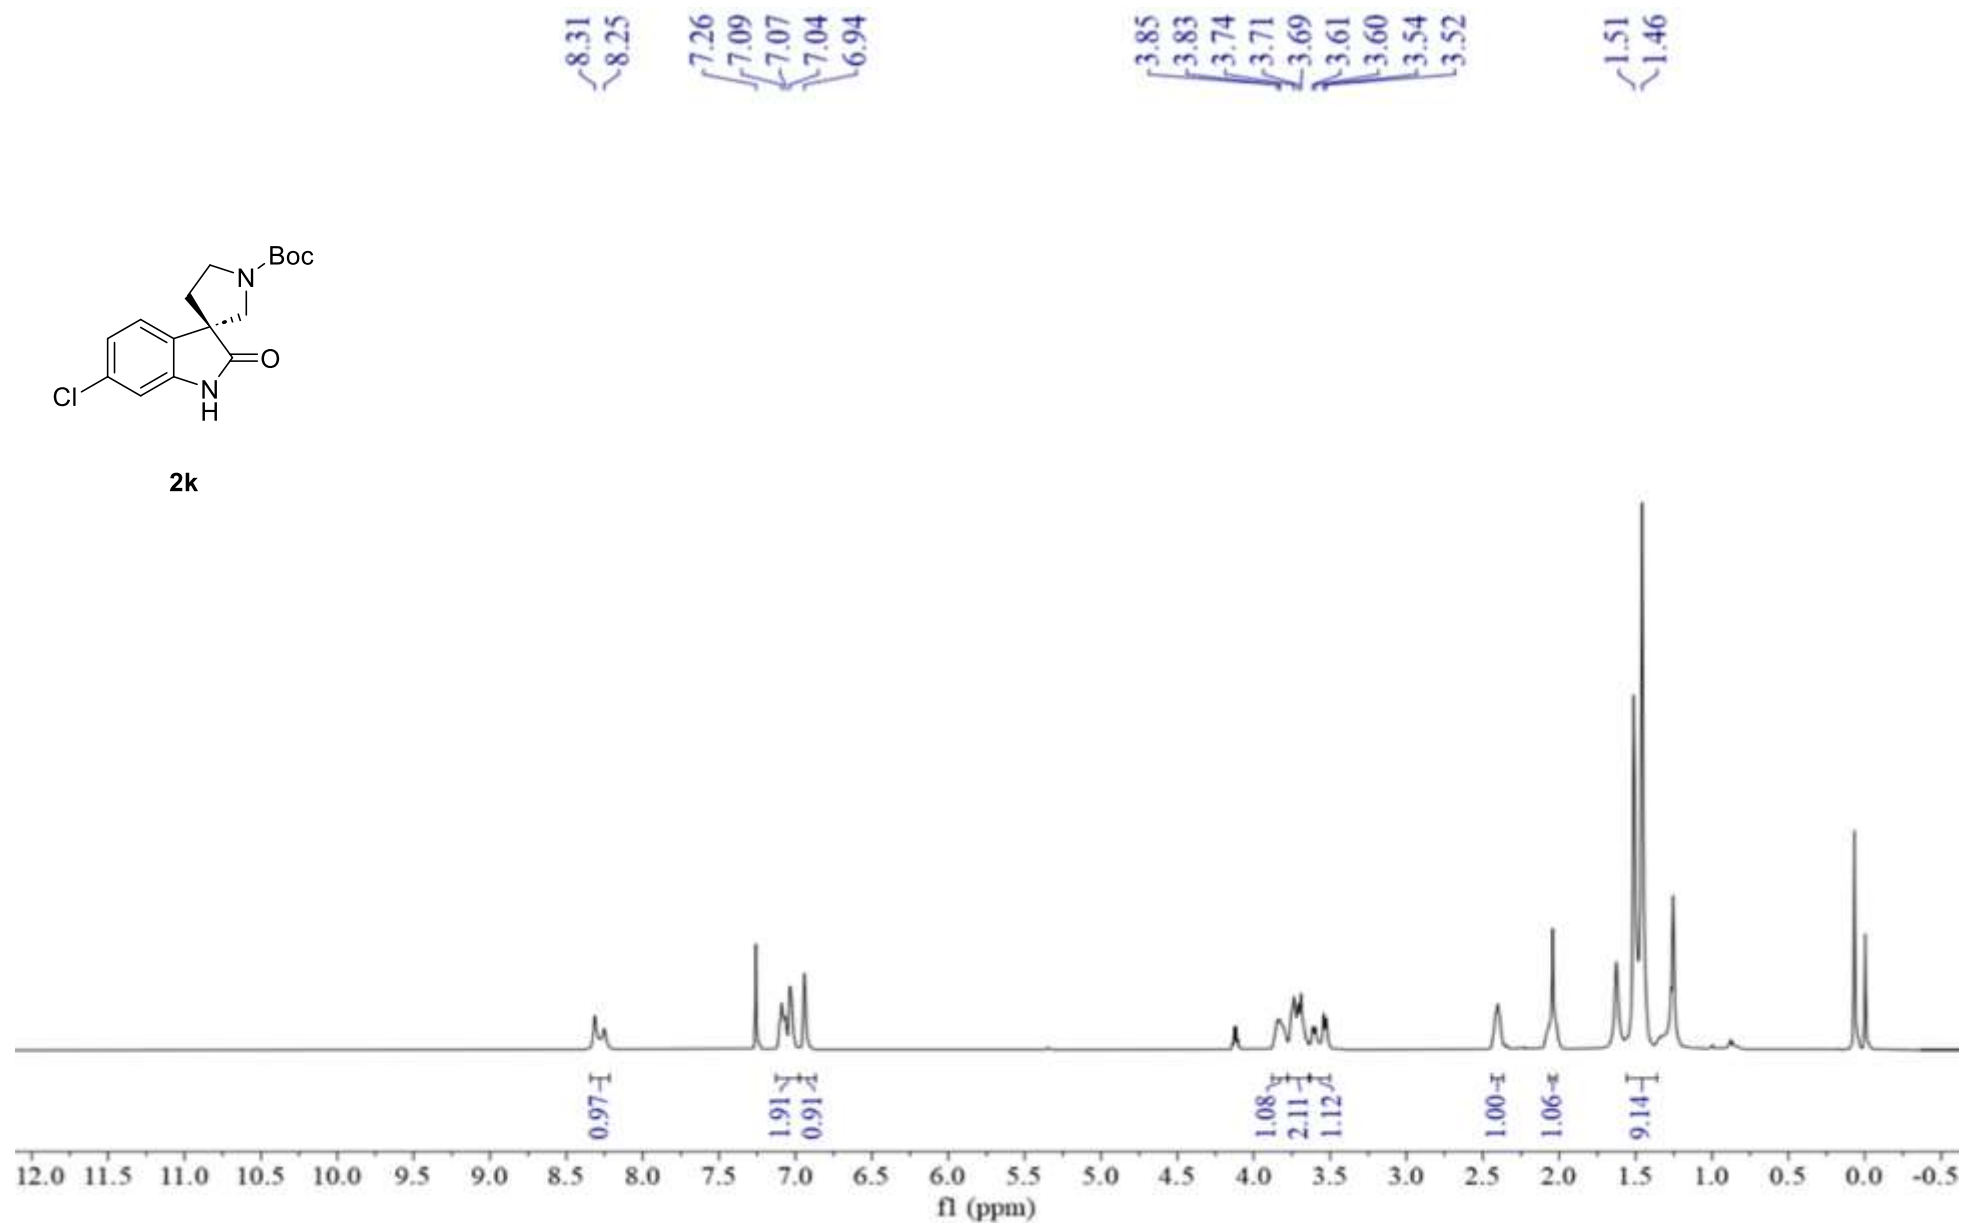



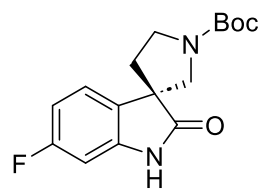

21

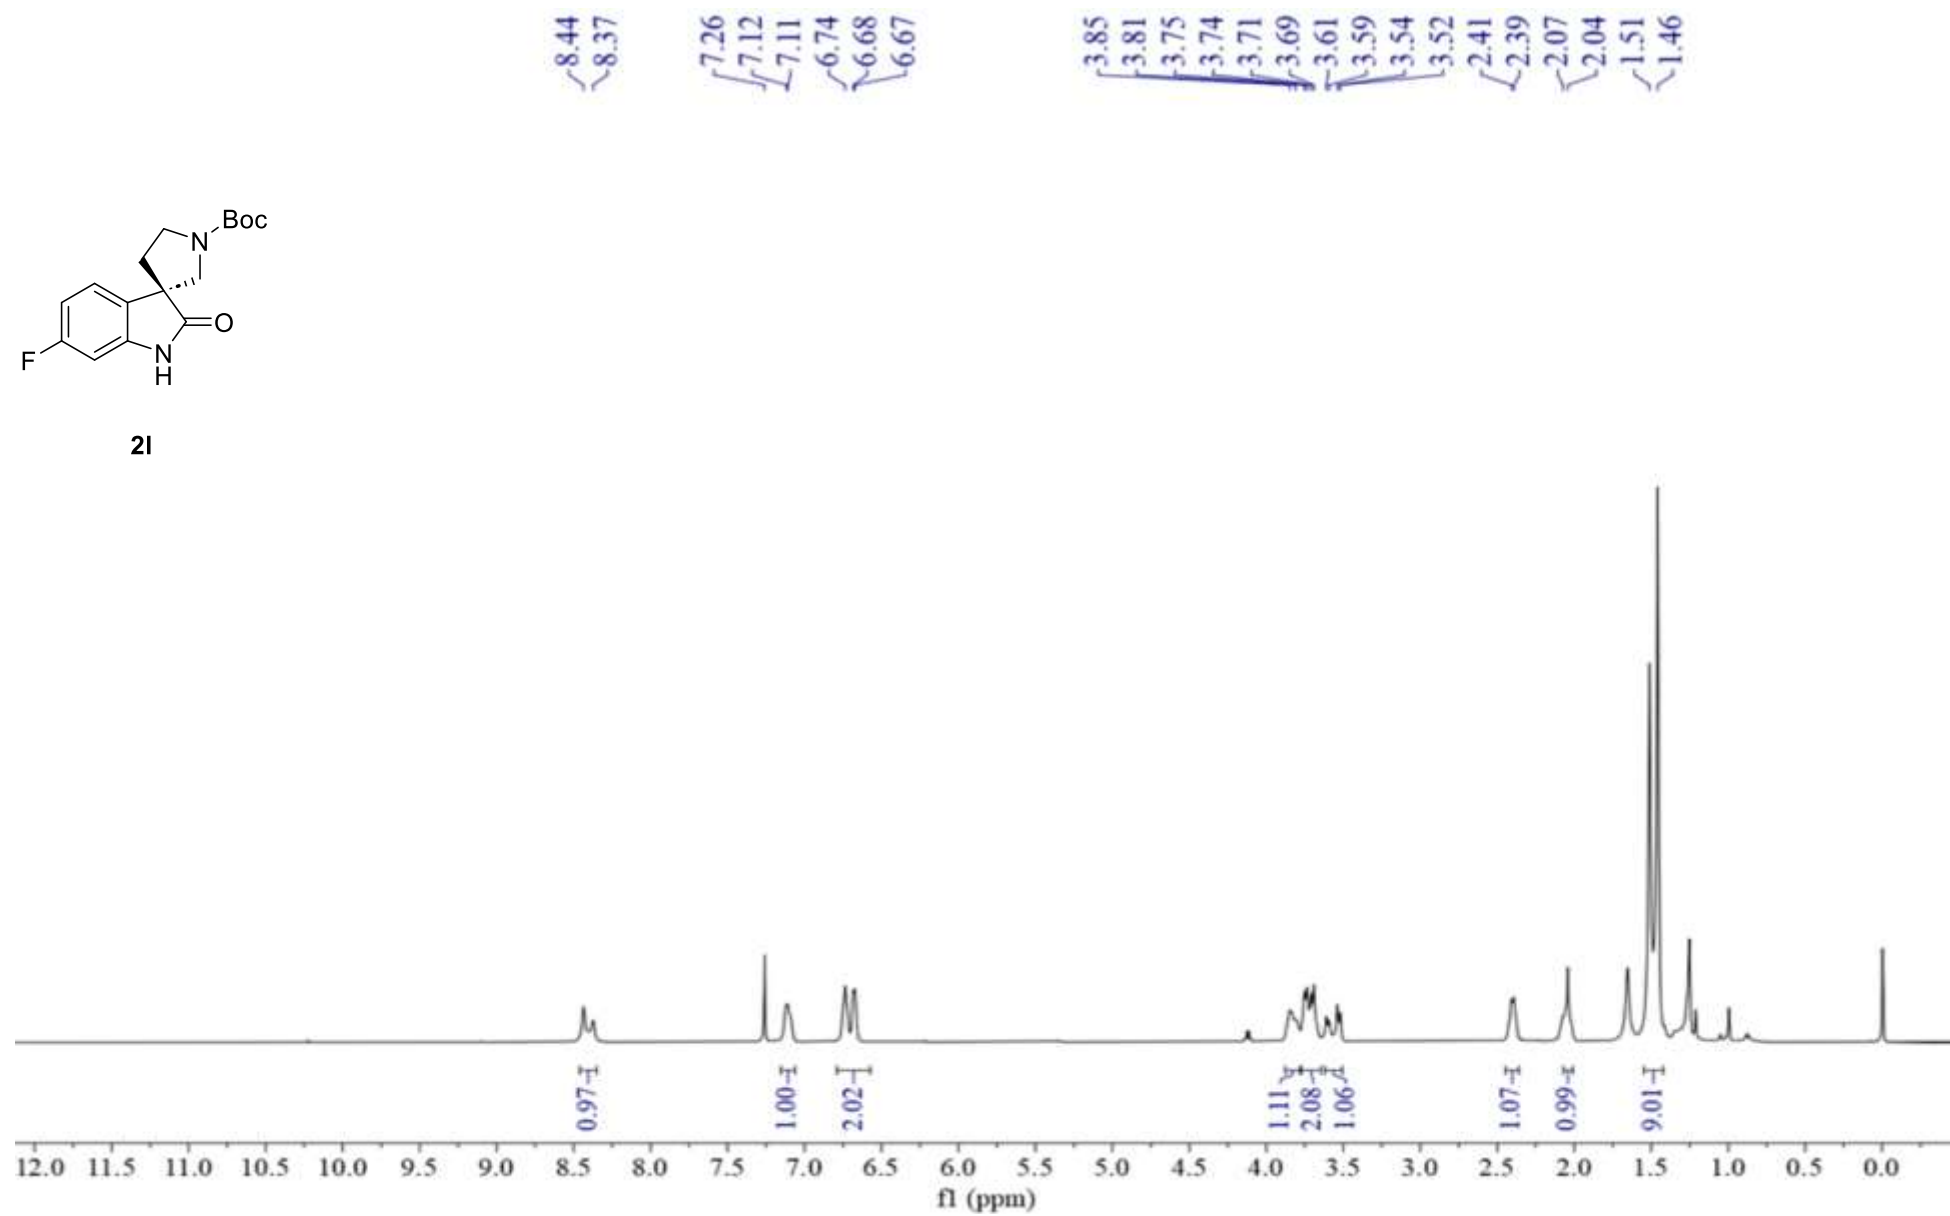

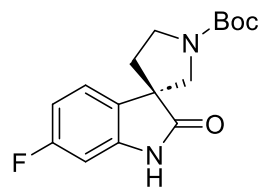

21

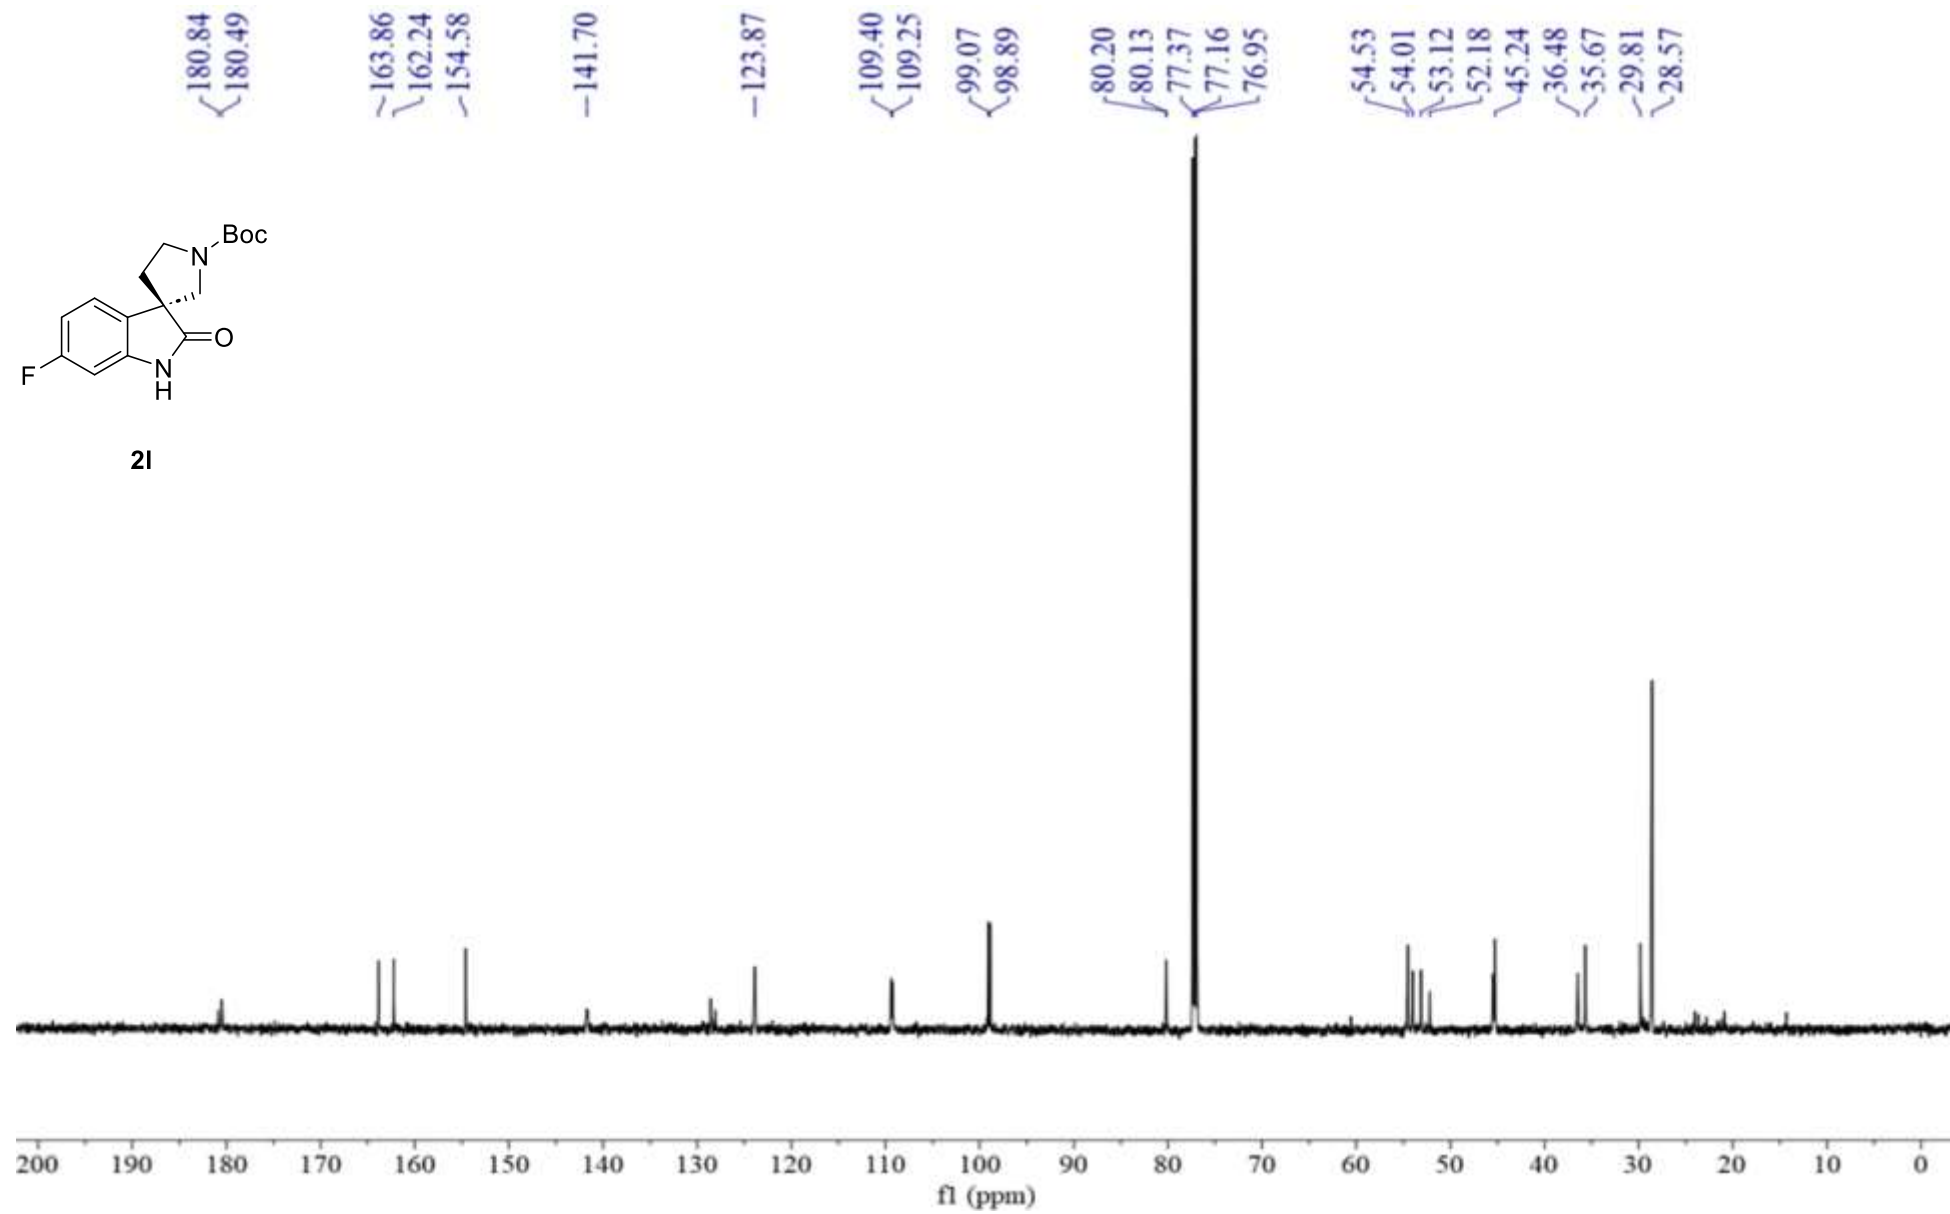

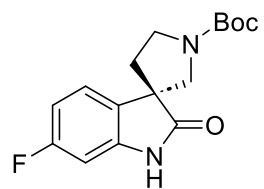

21

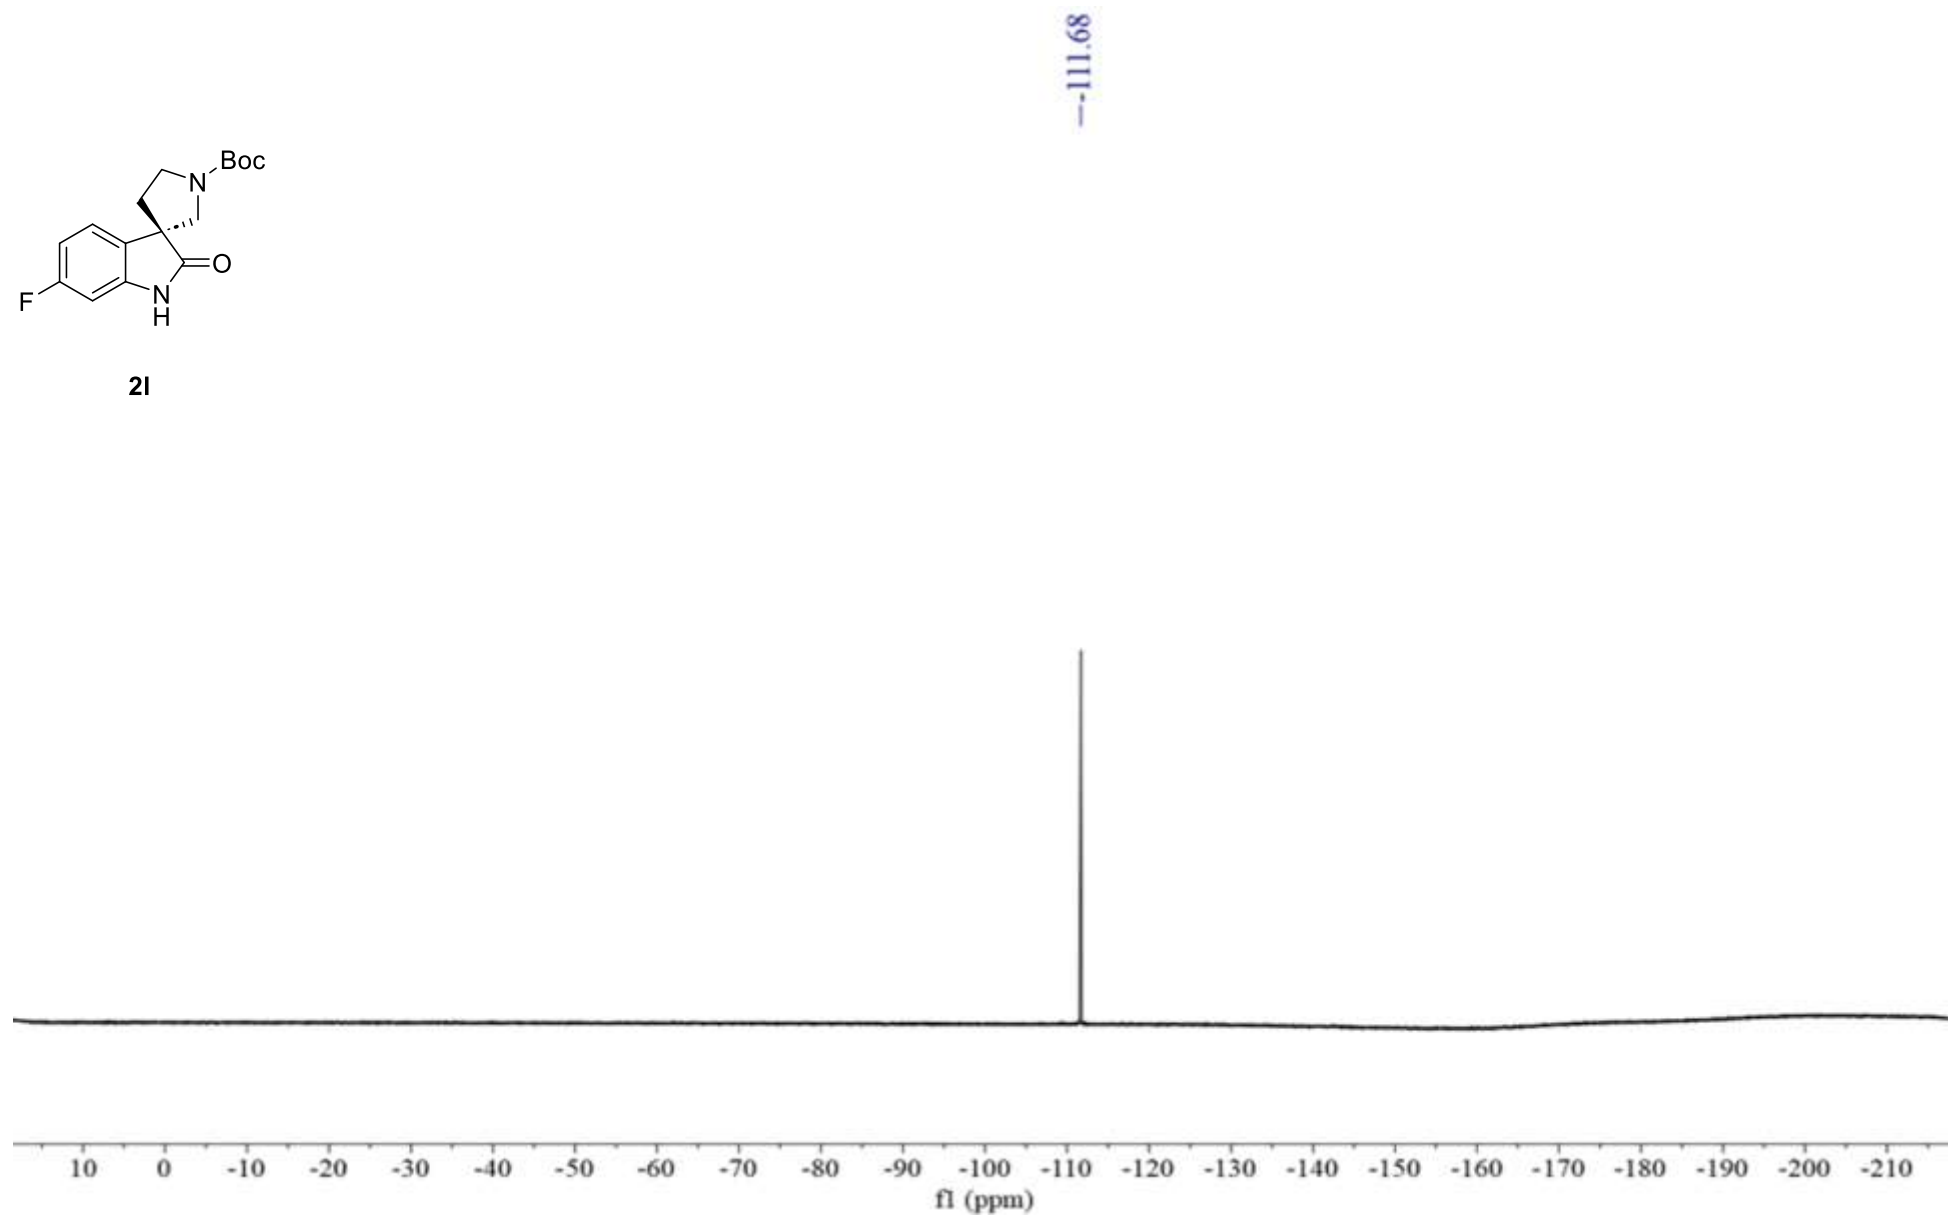

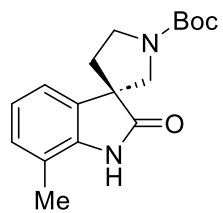

2m

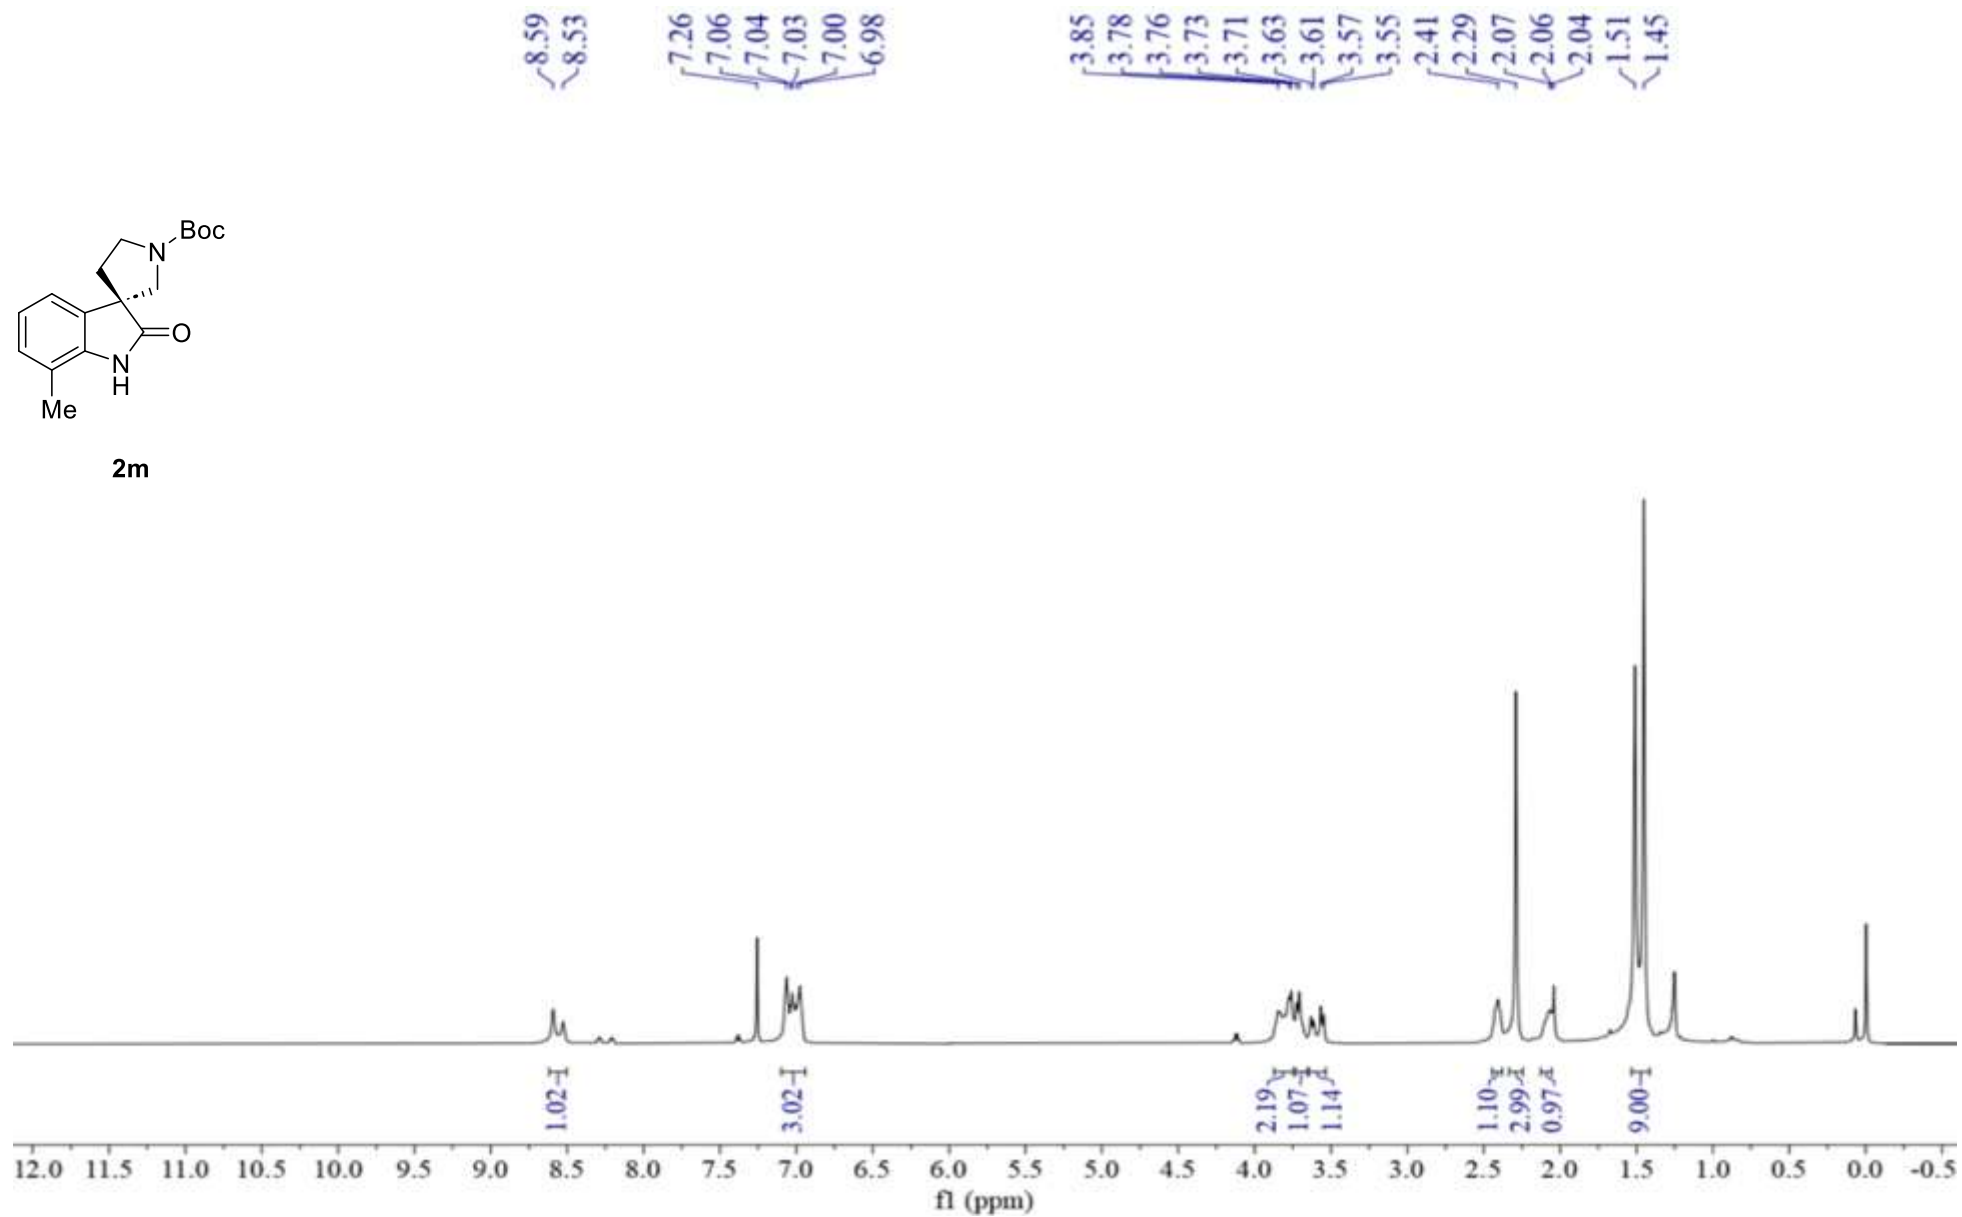



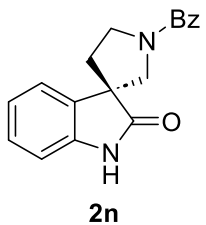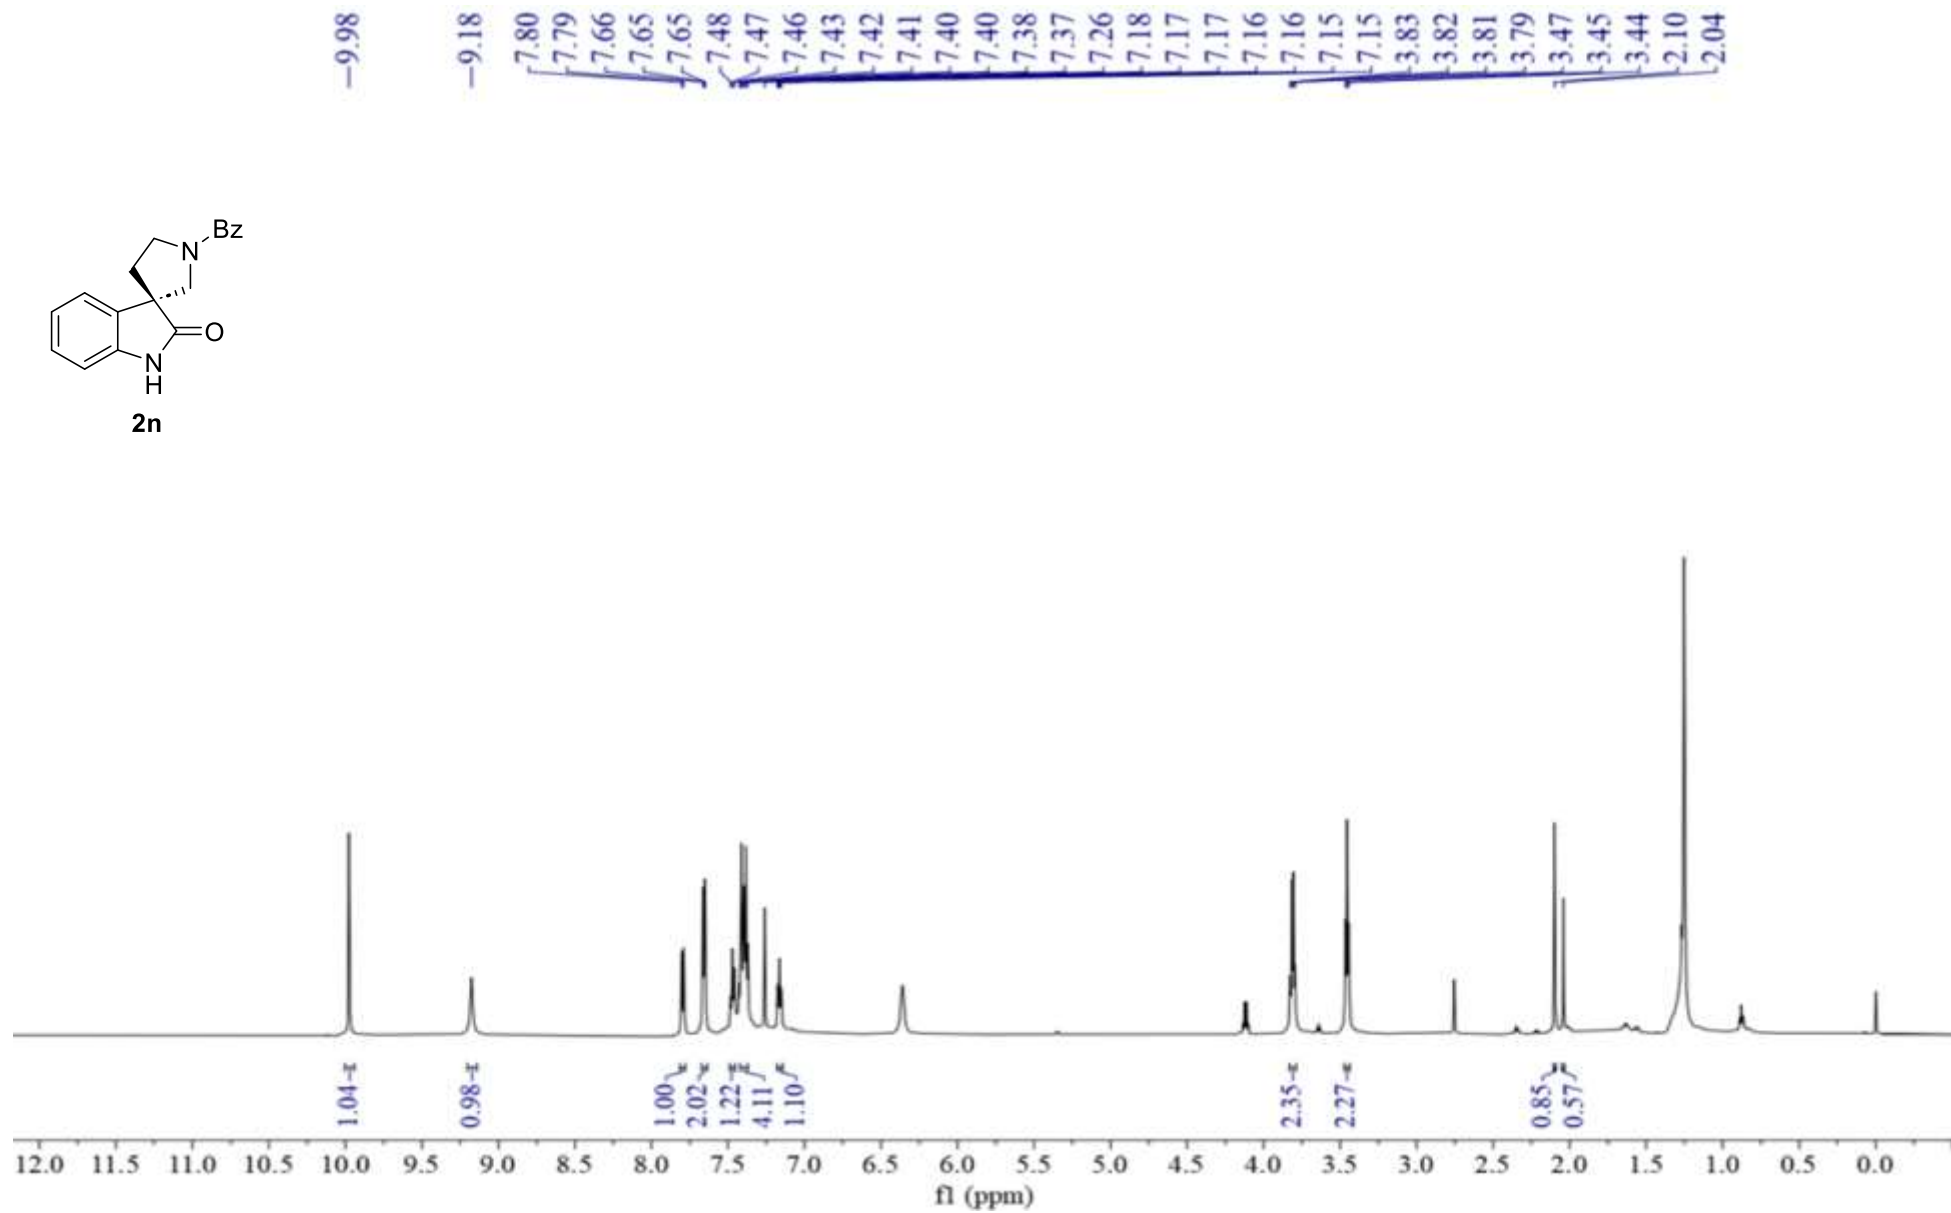

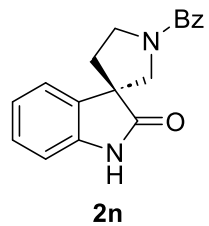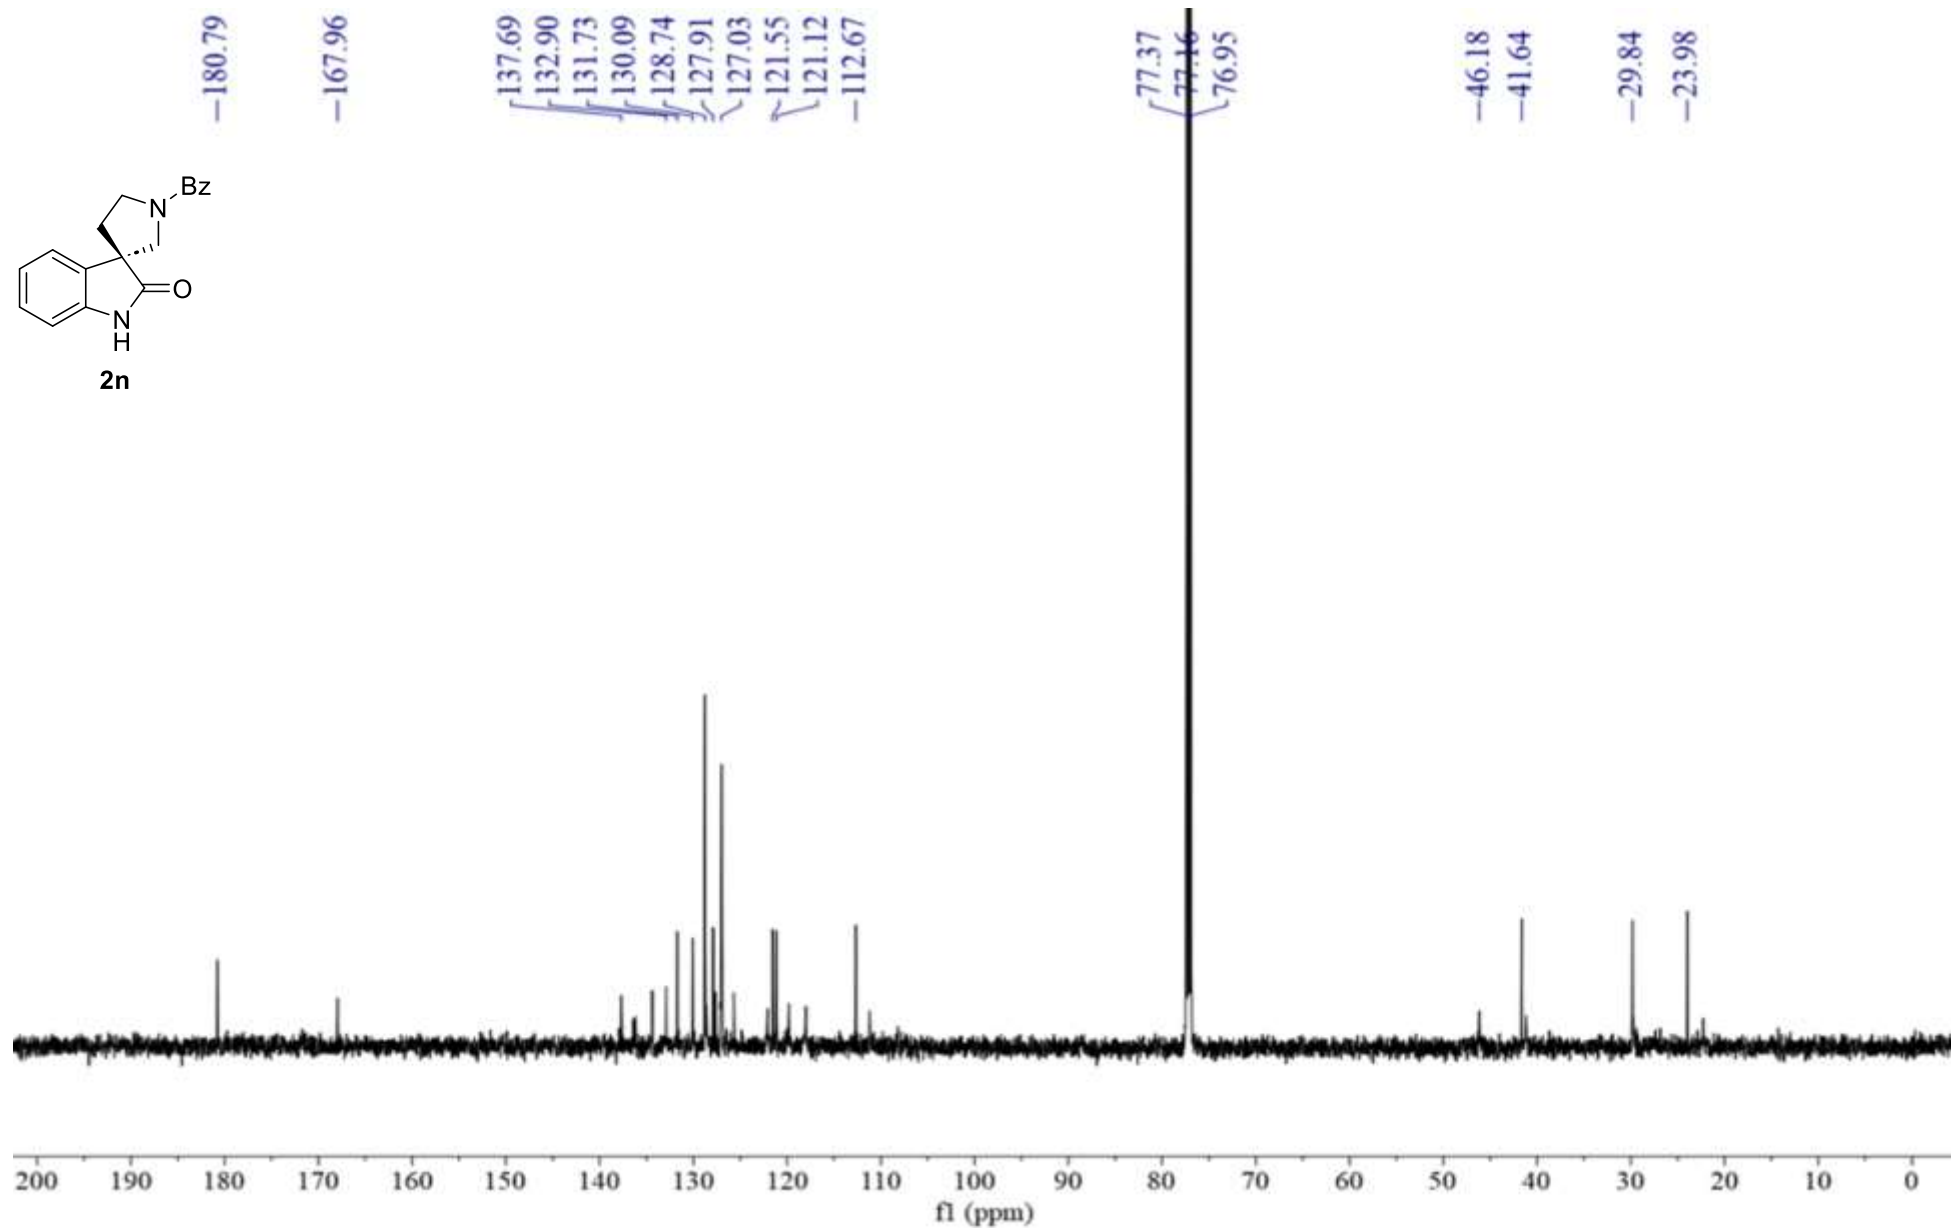

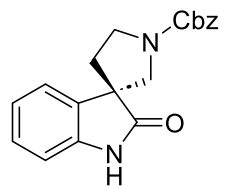

20

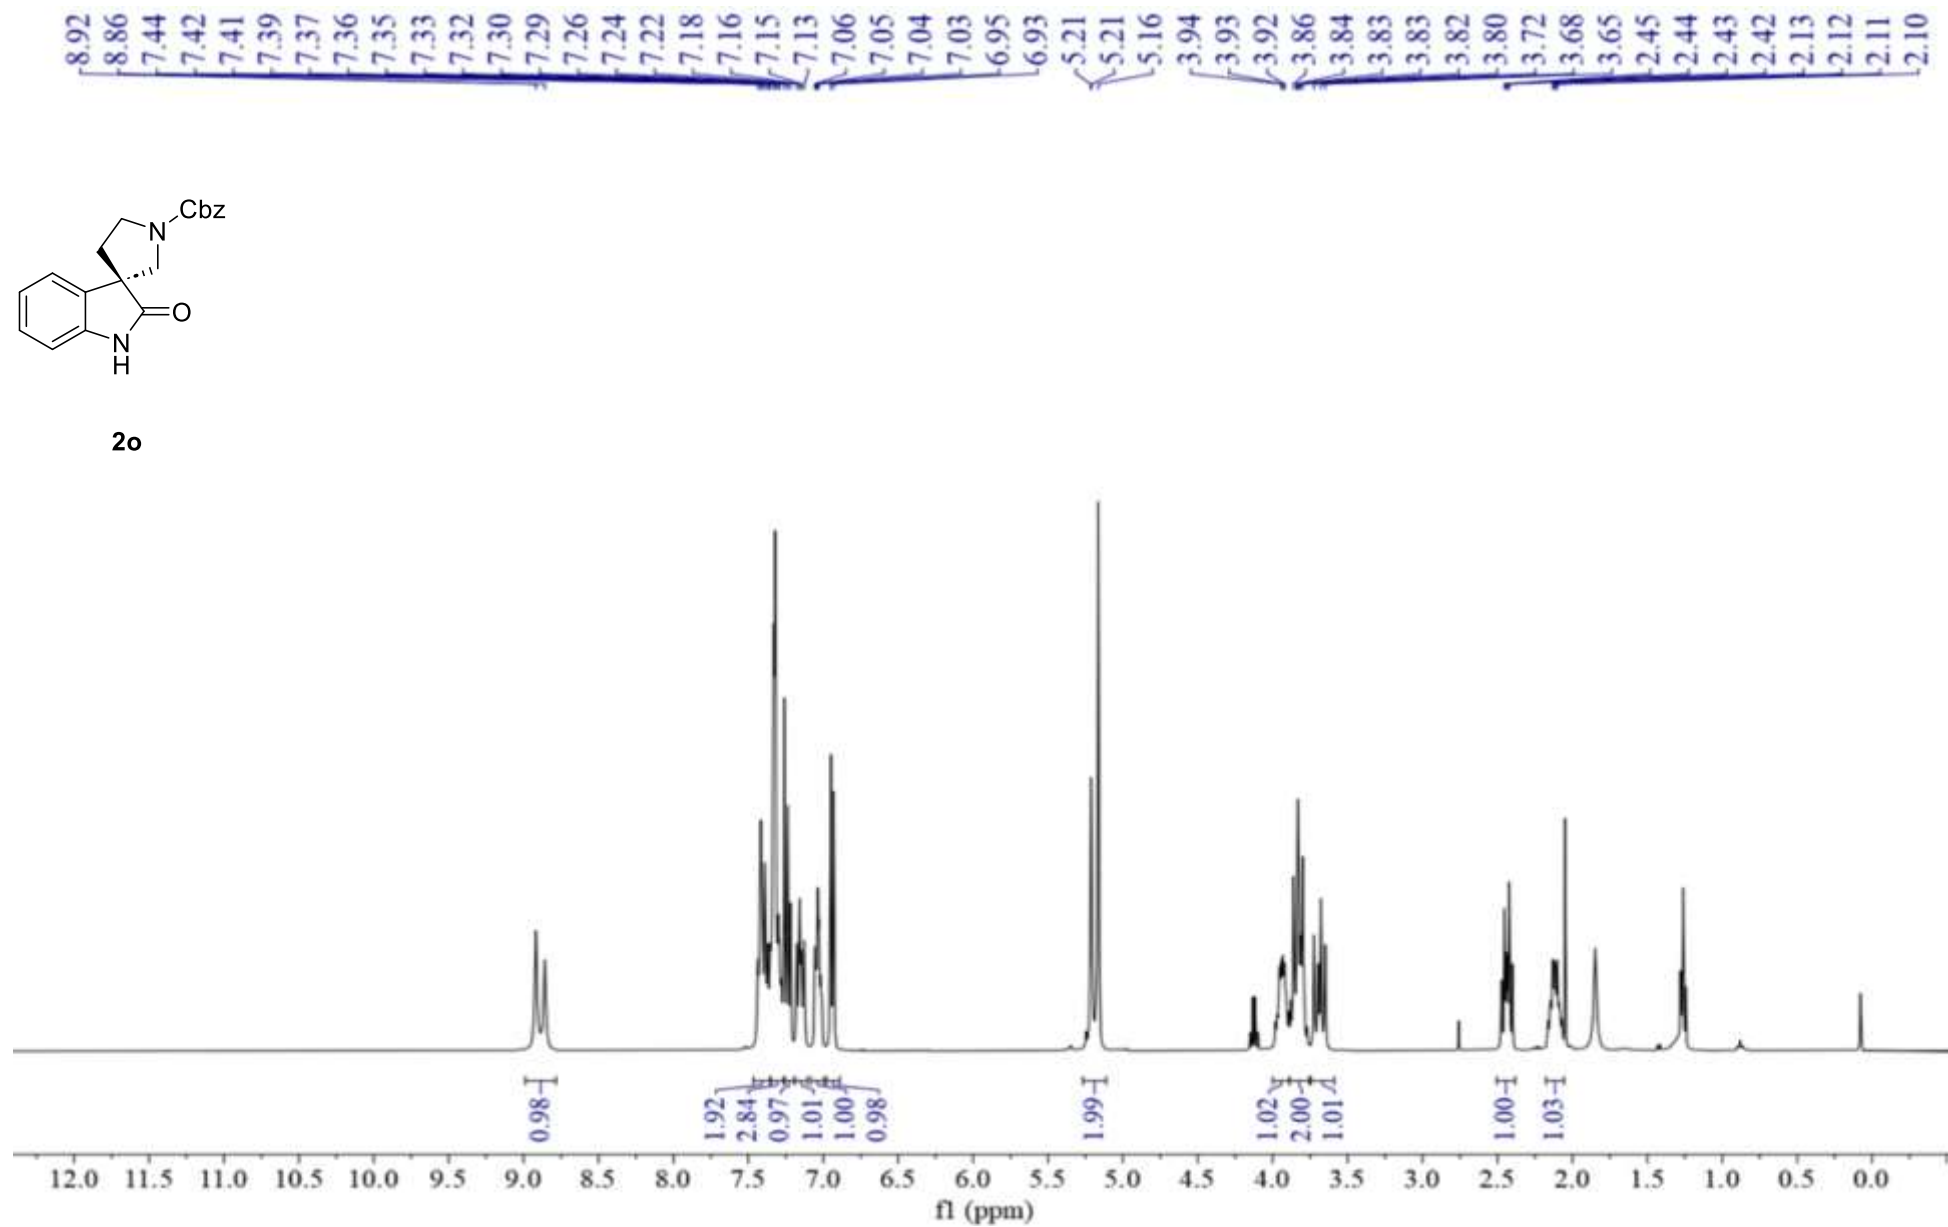

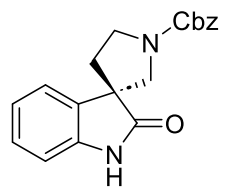

2o

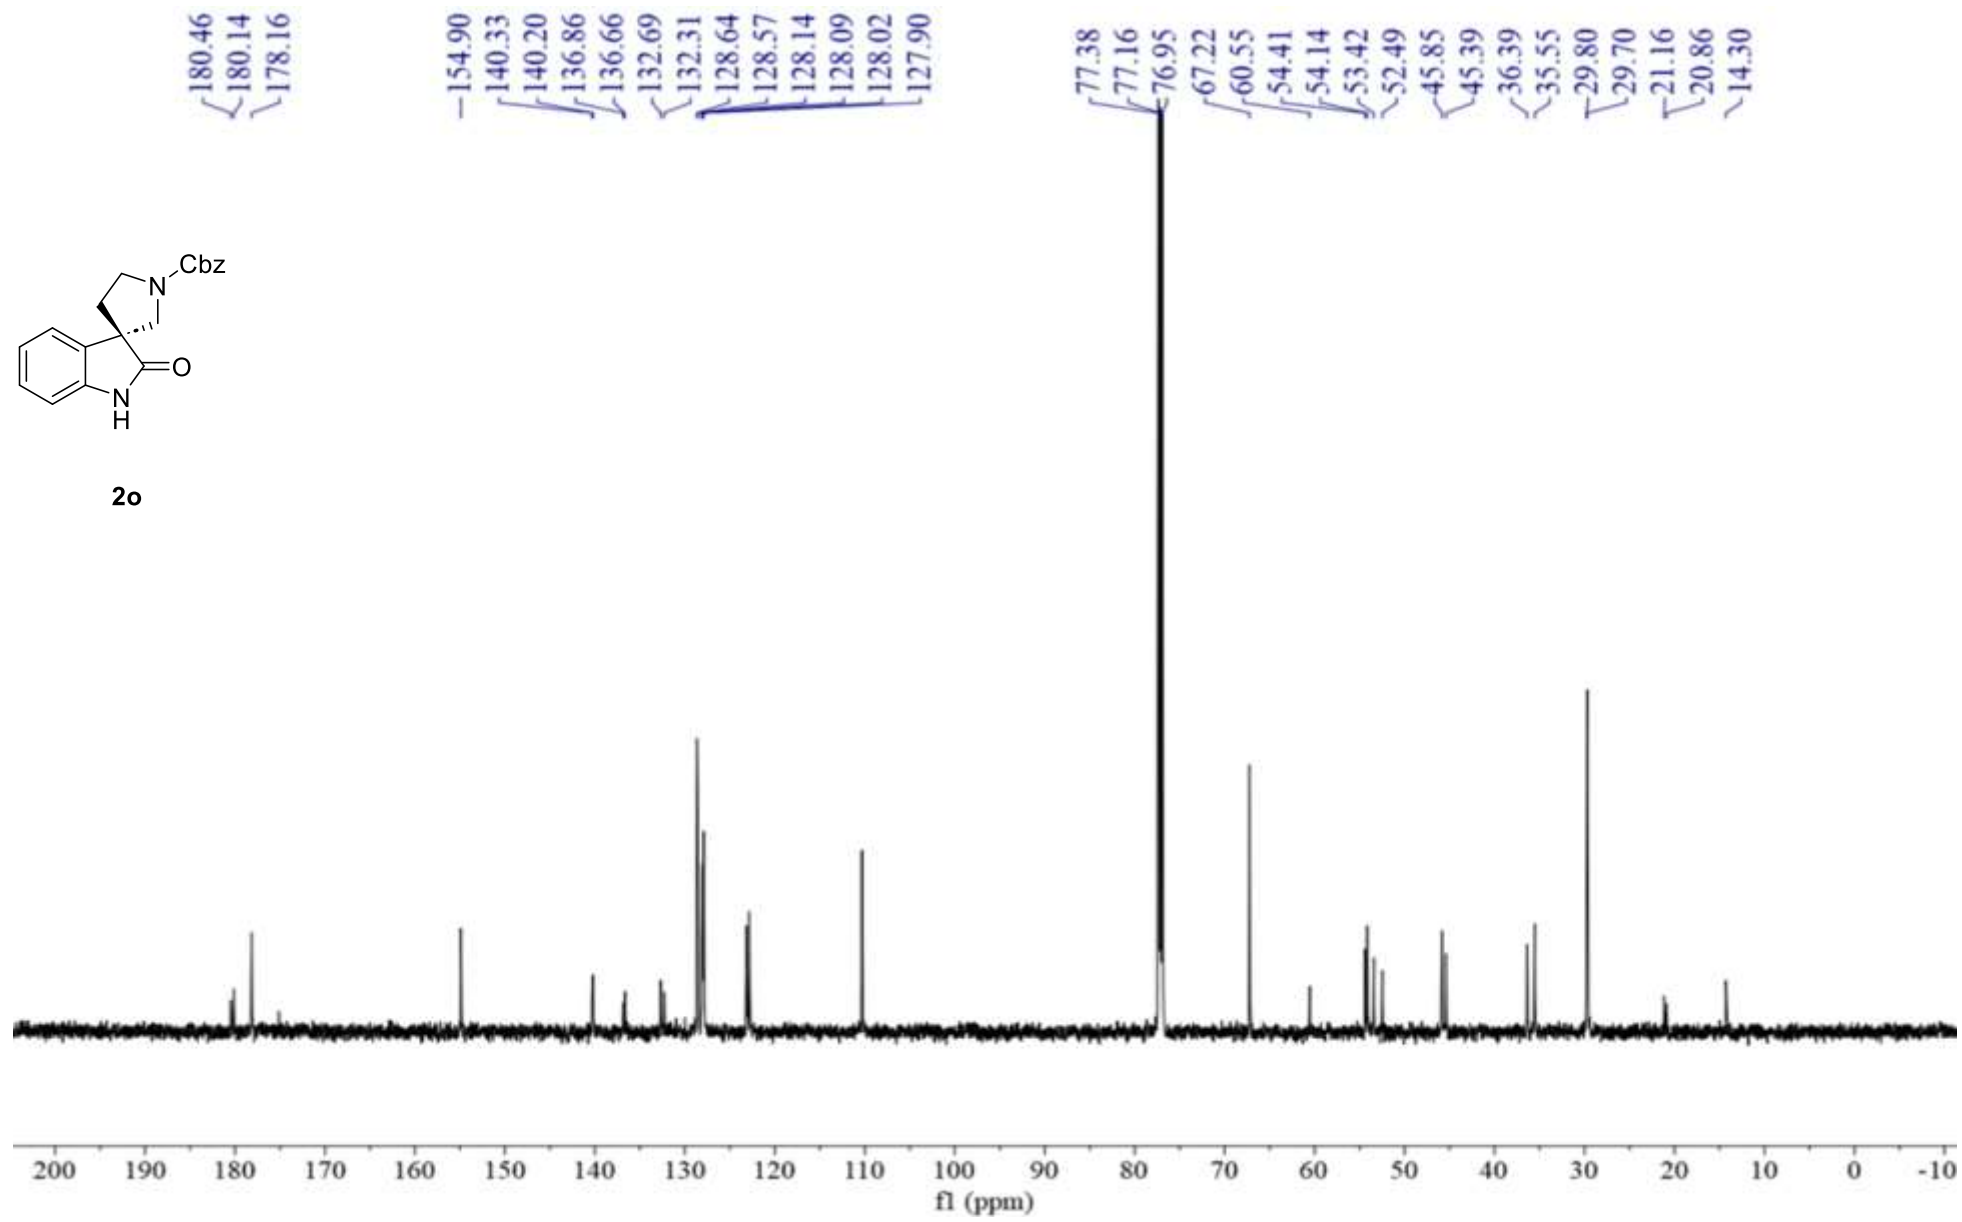

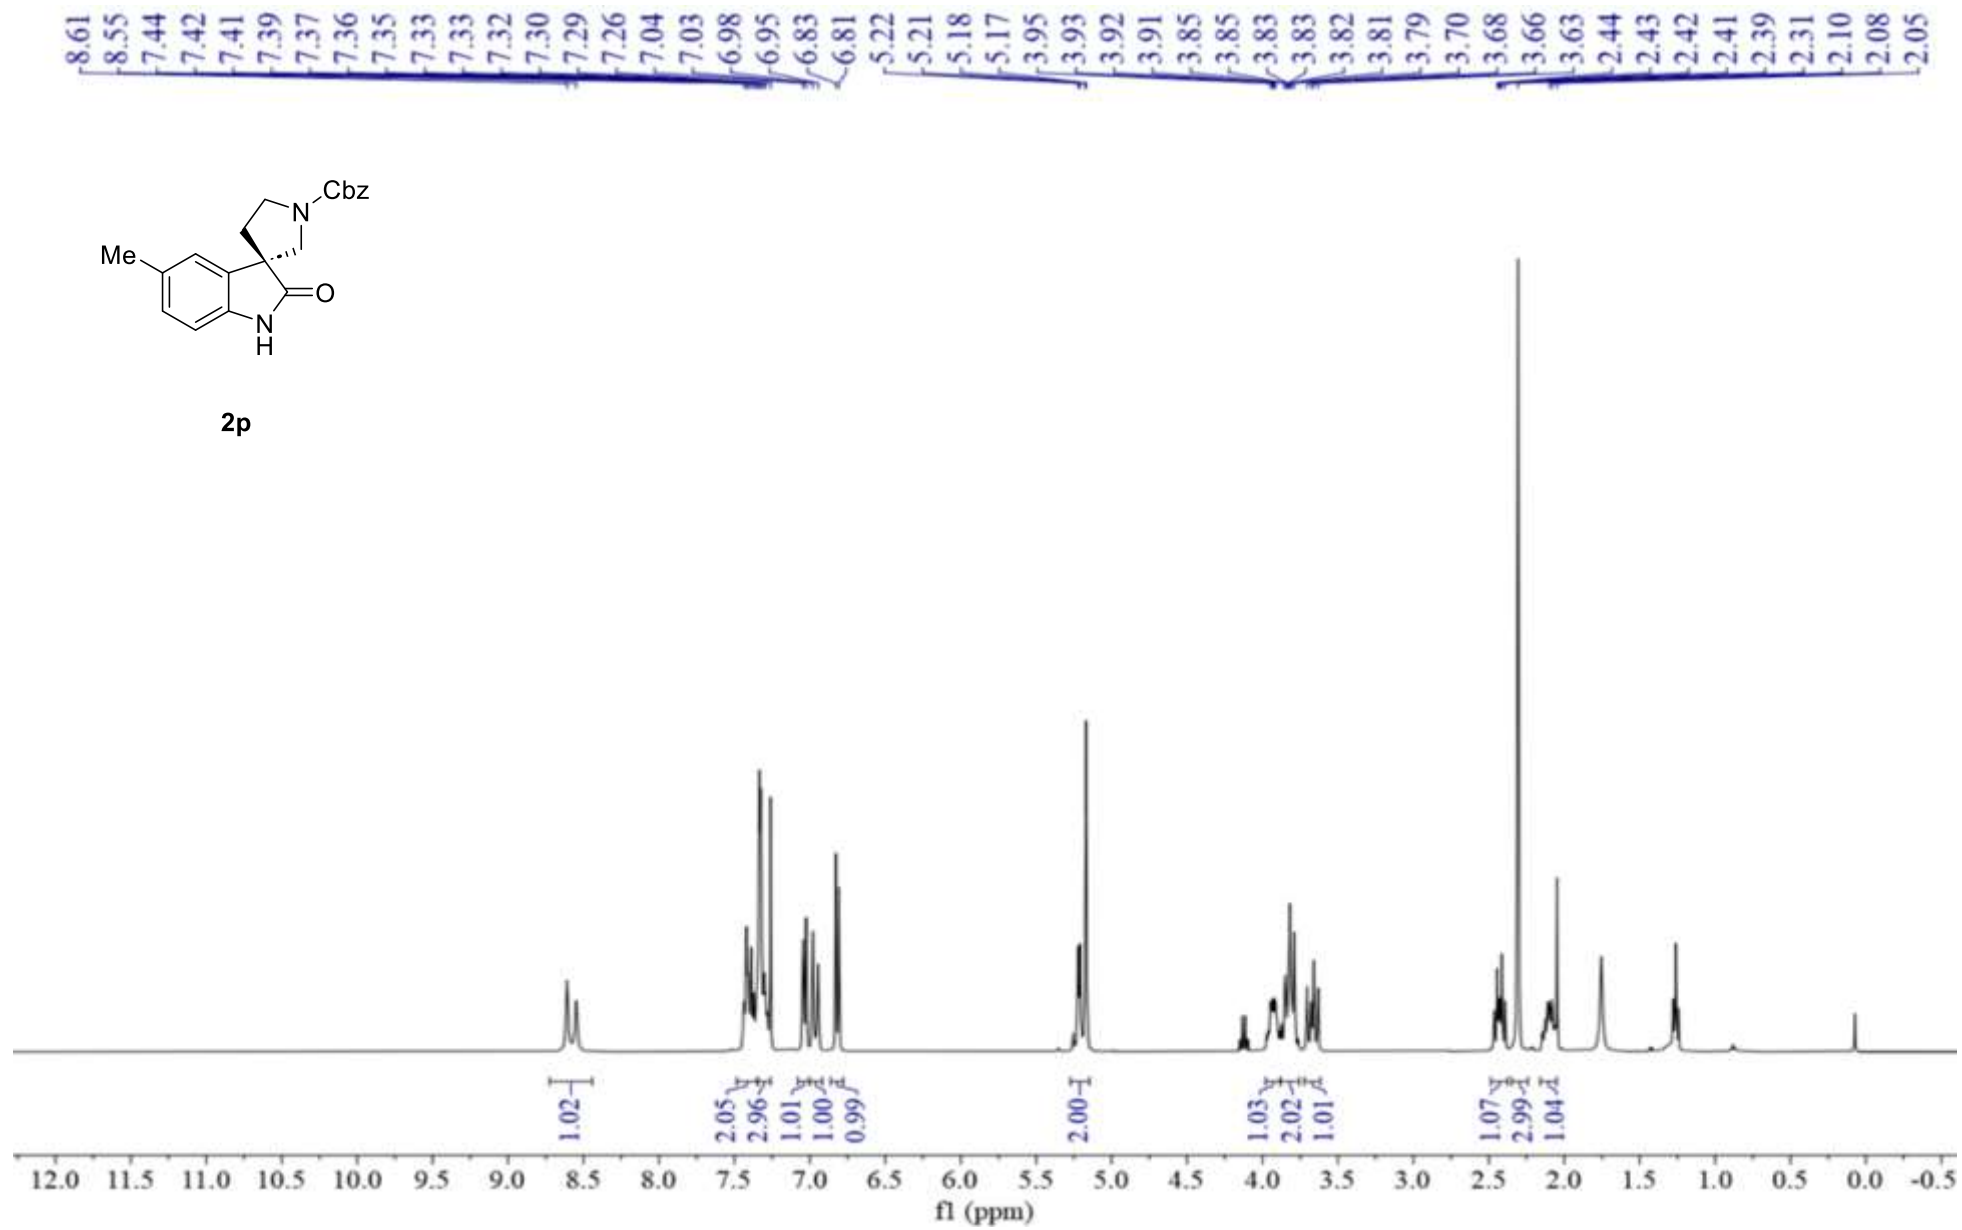

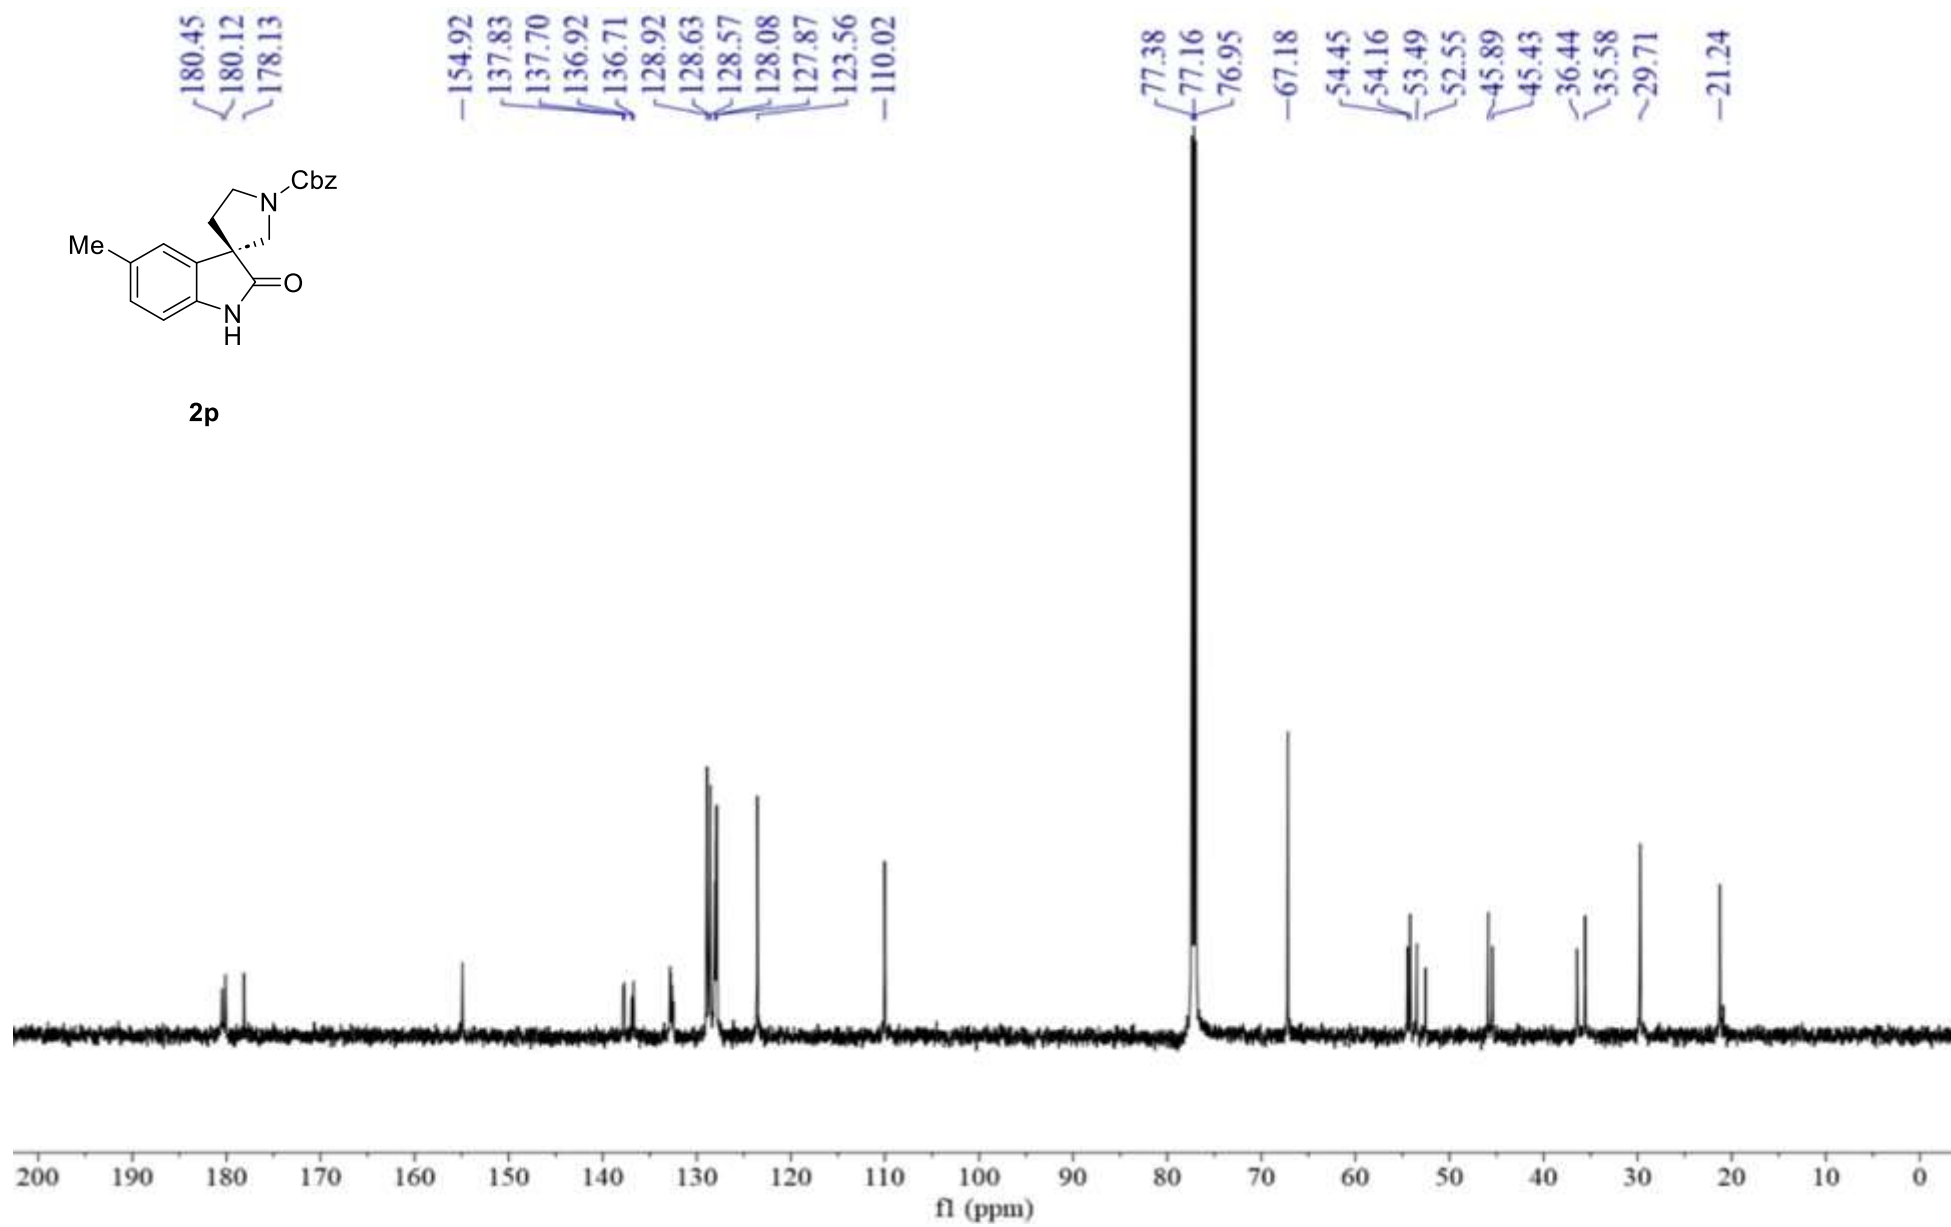

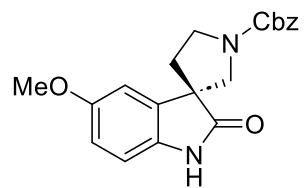

2q

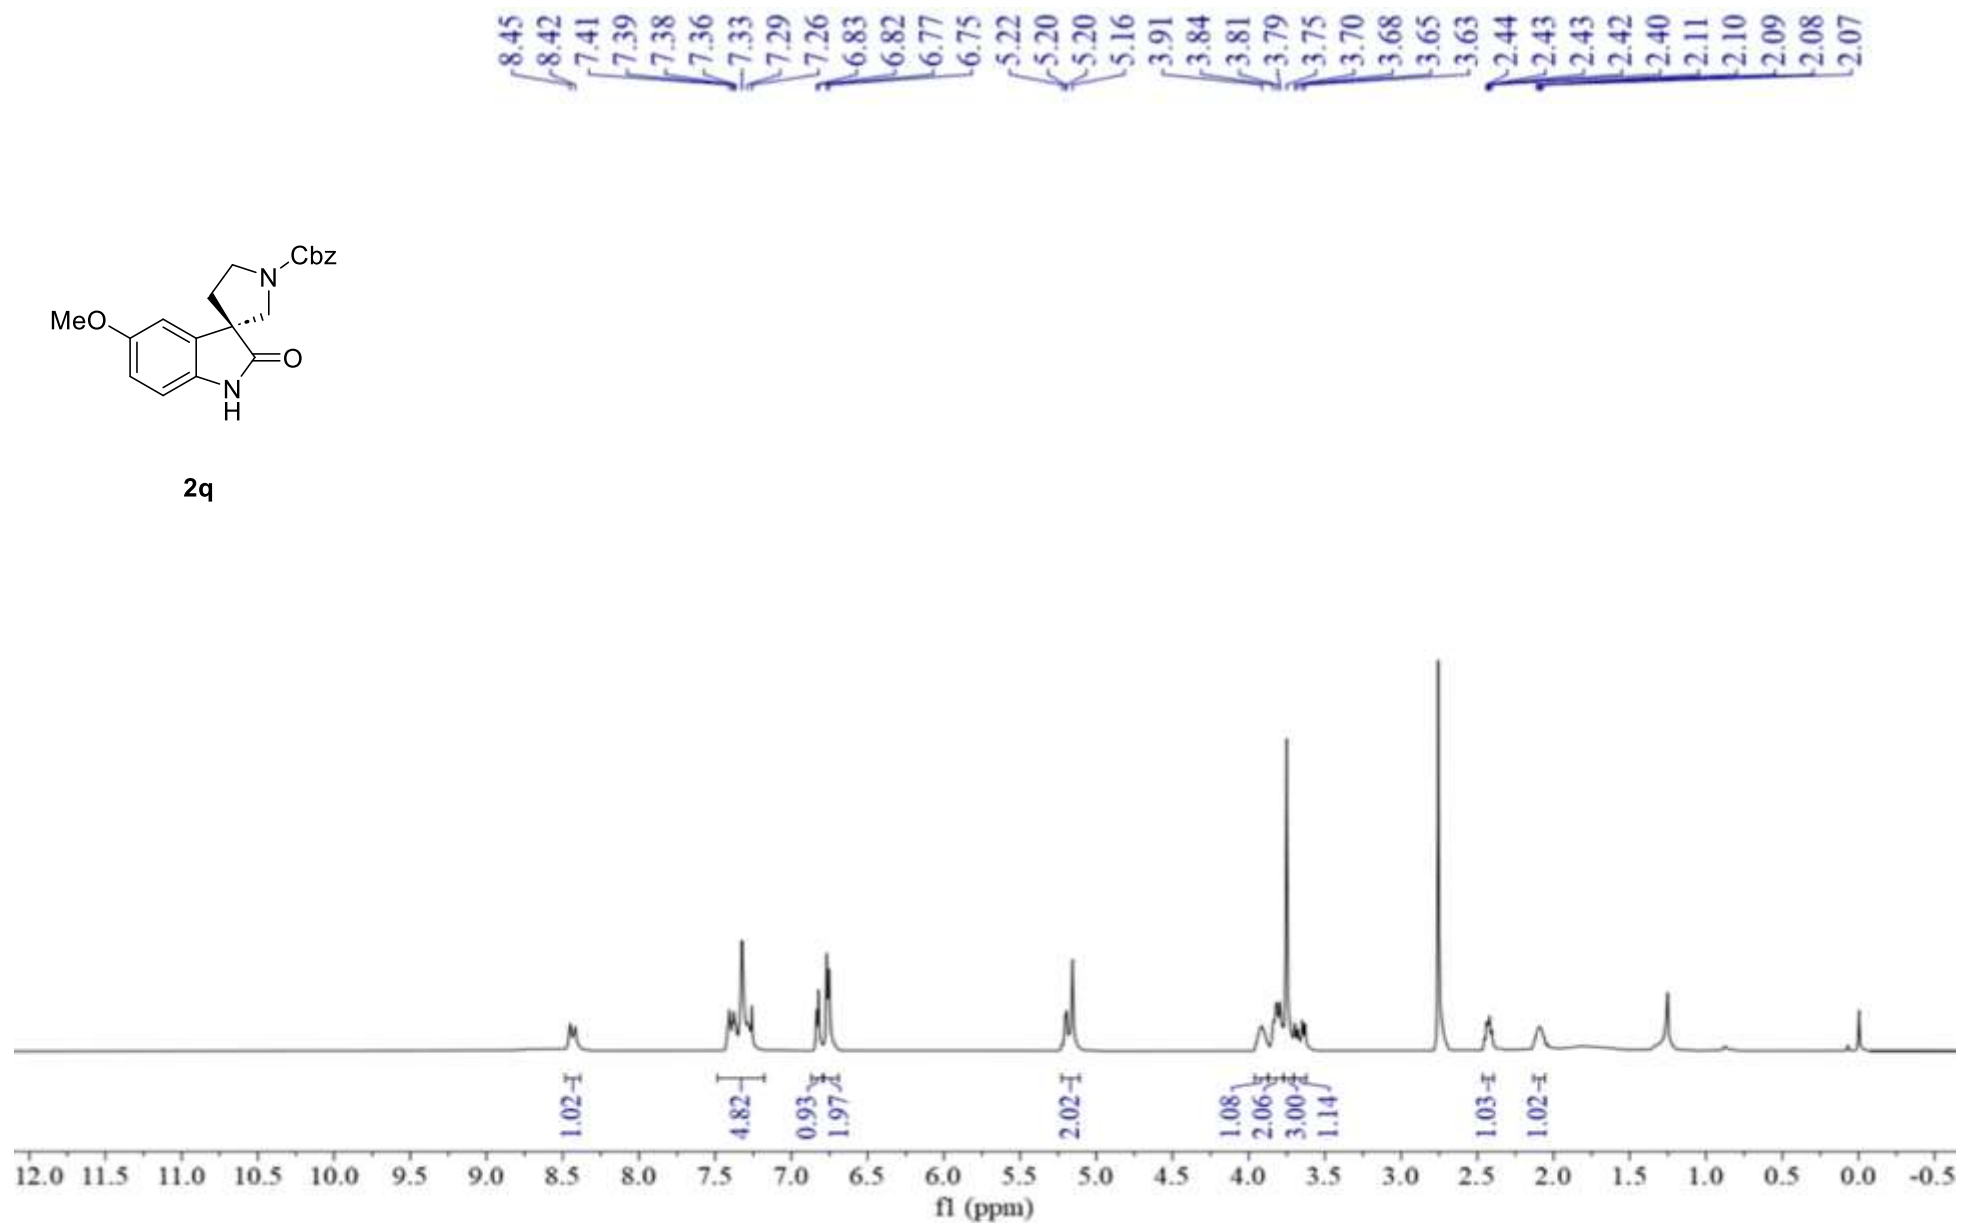

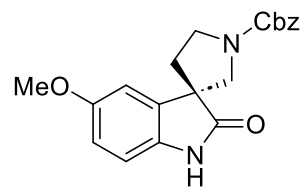

2q

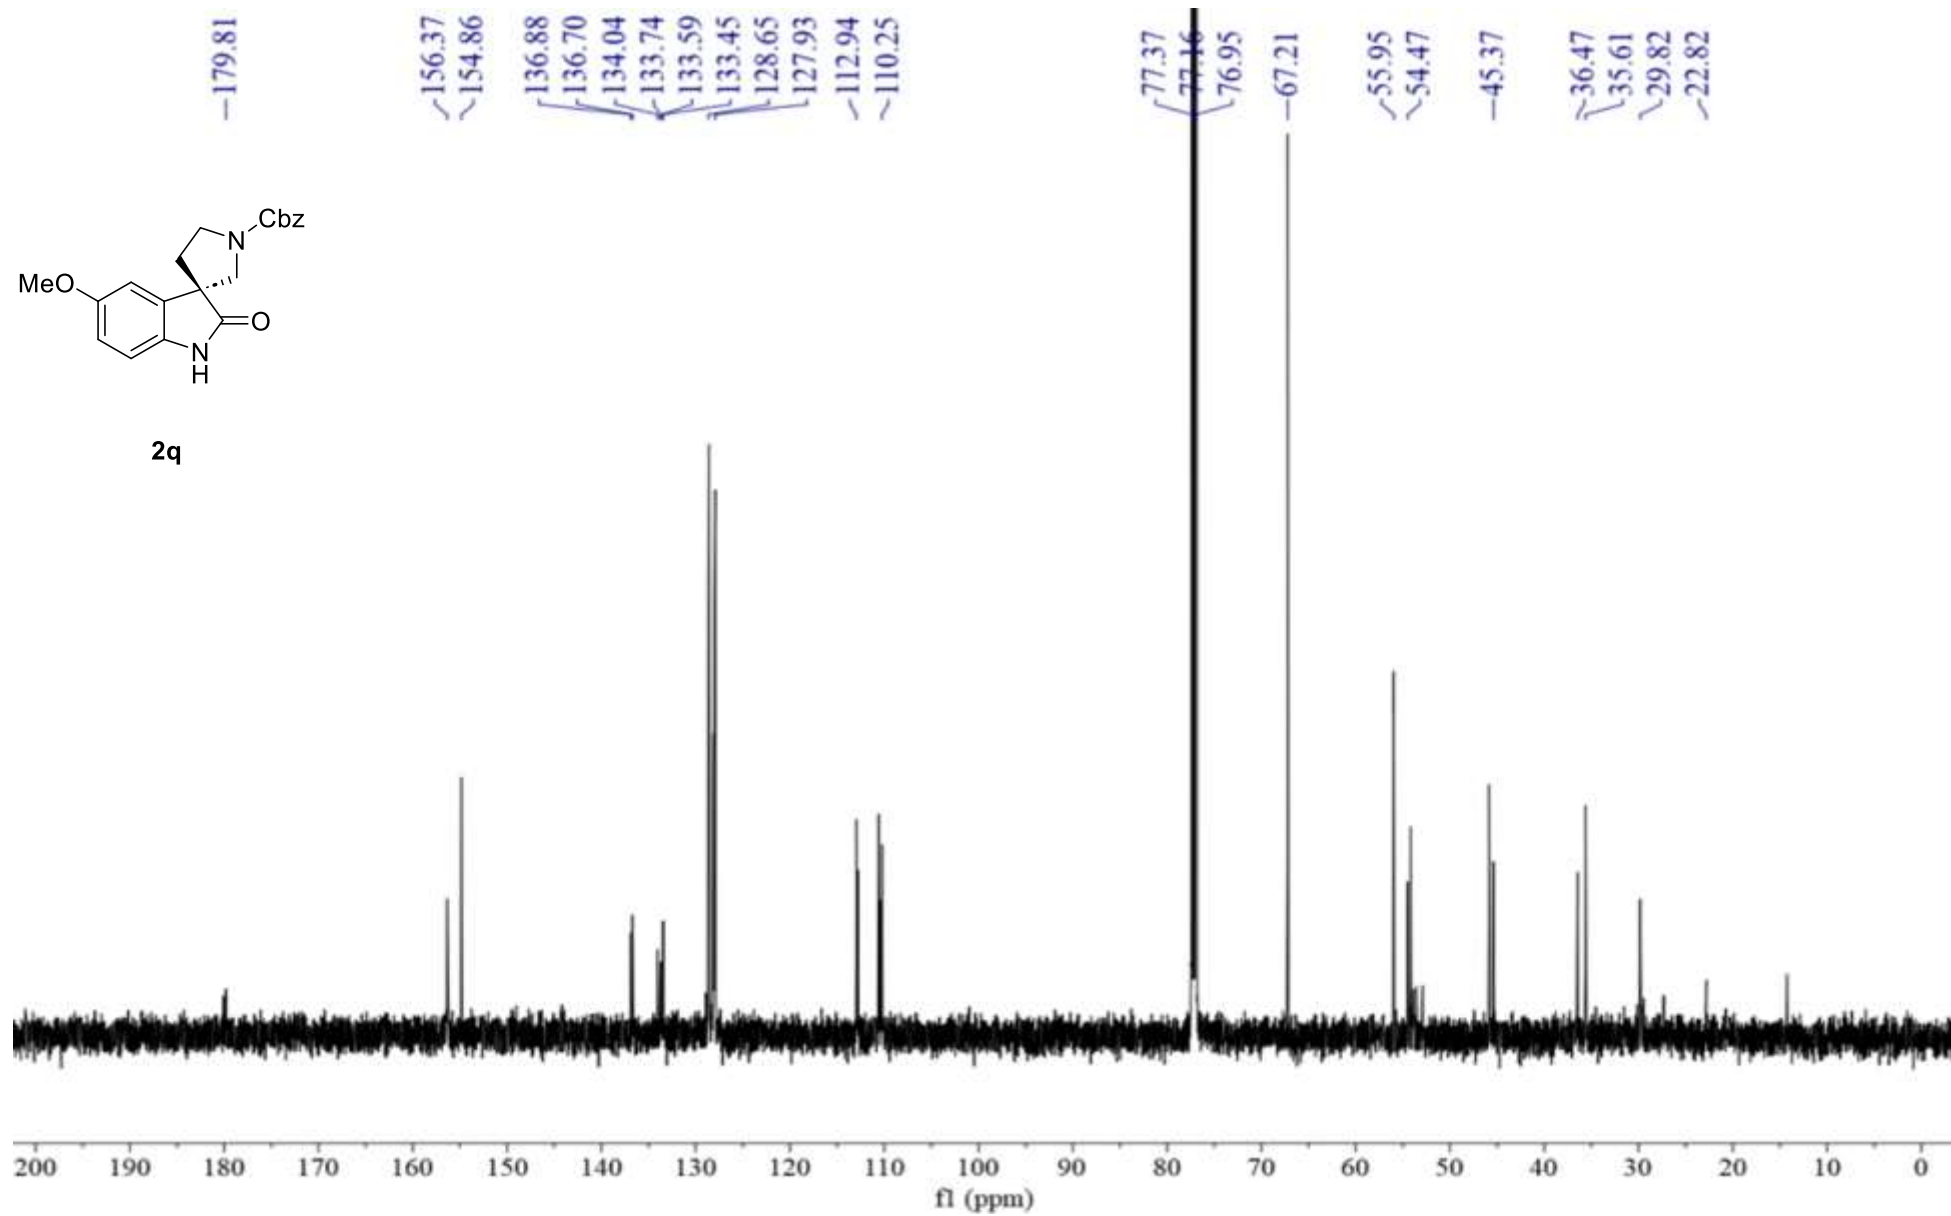

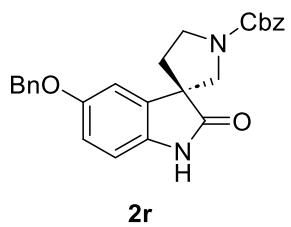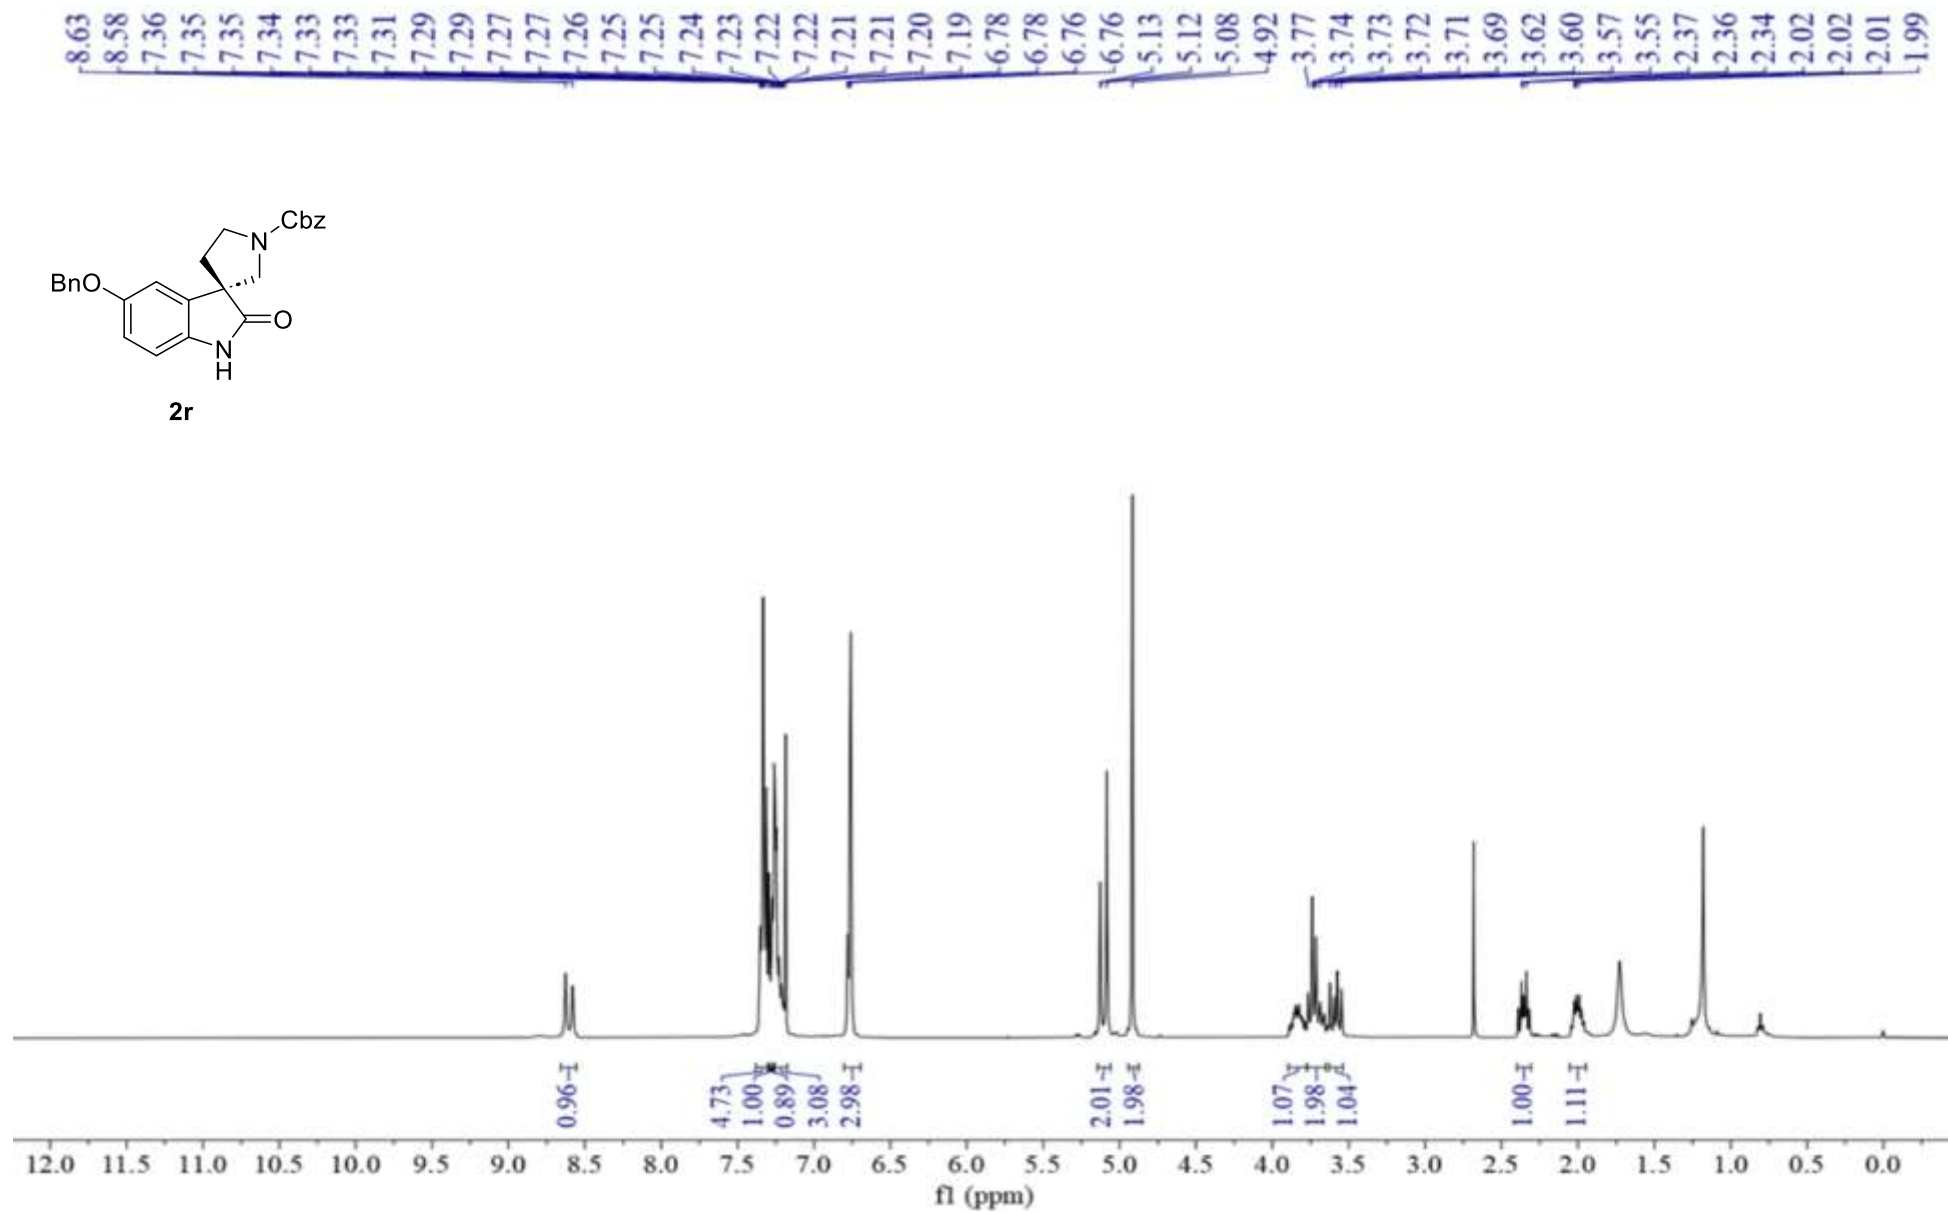

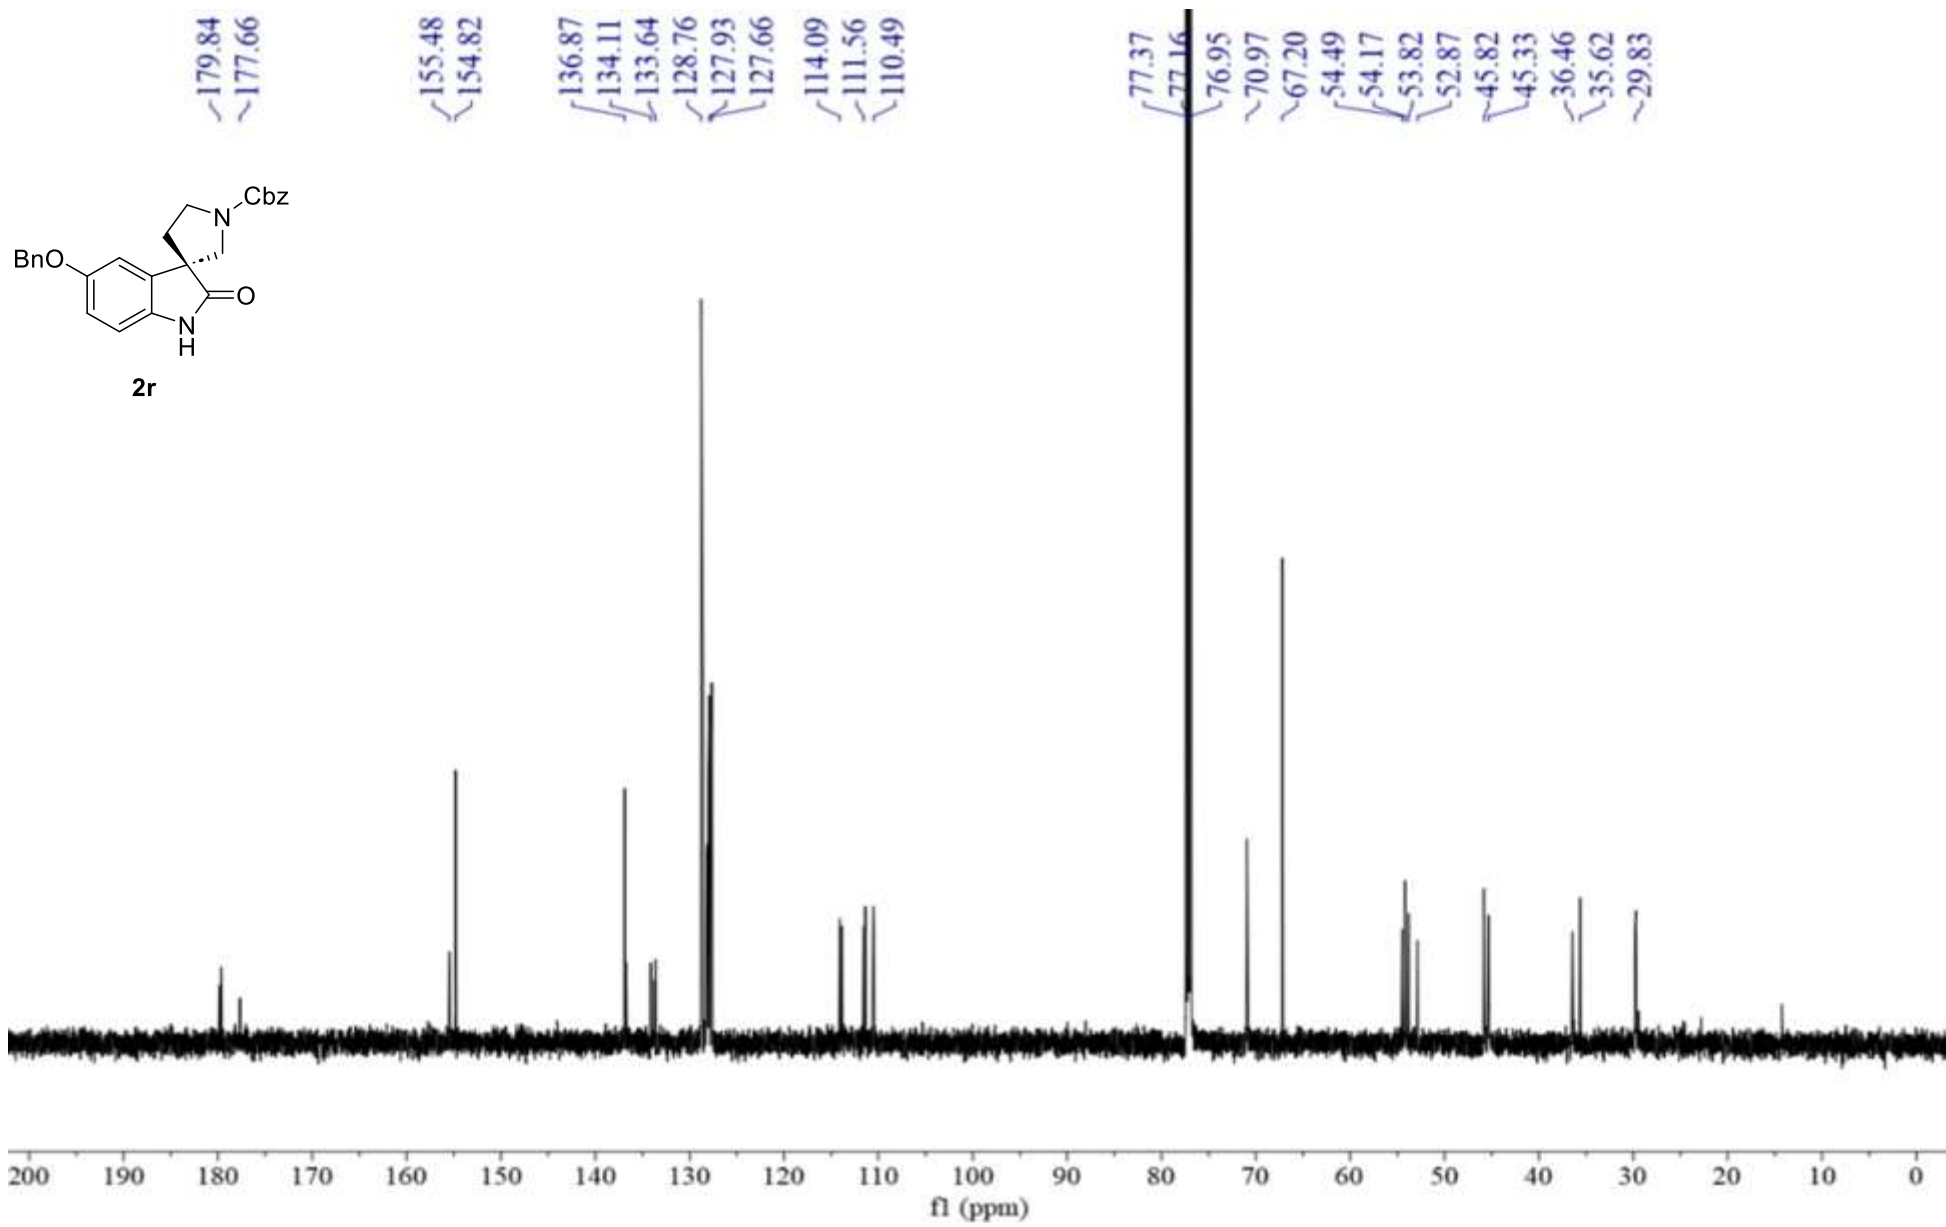

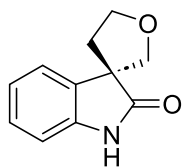

**2s**

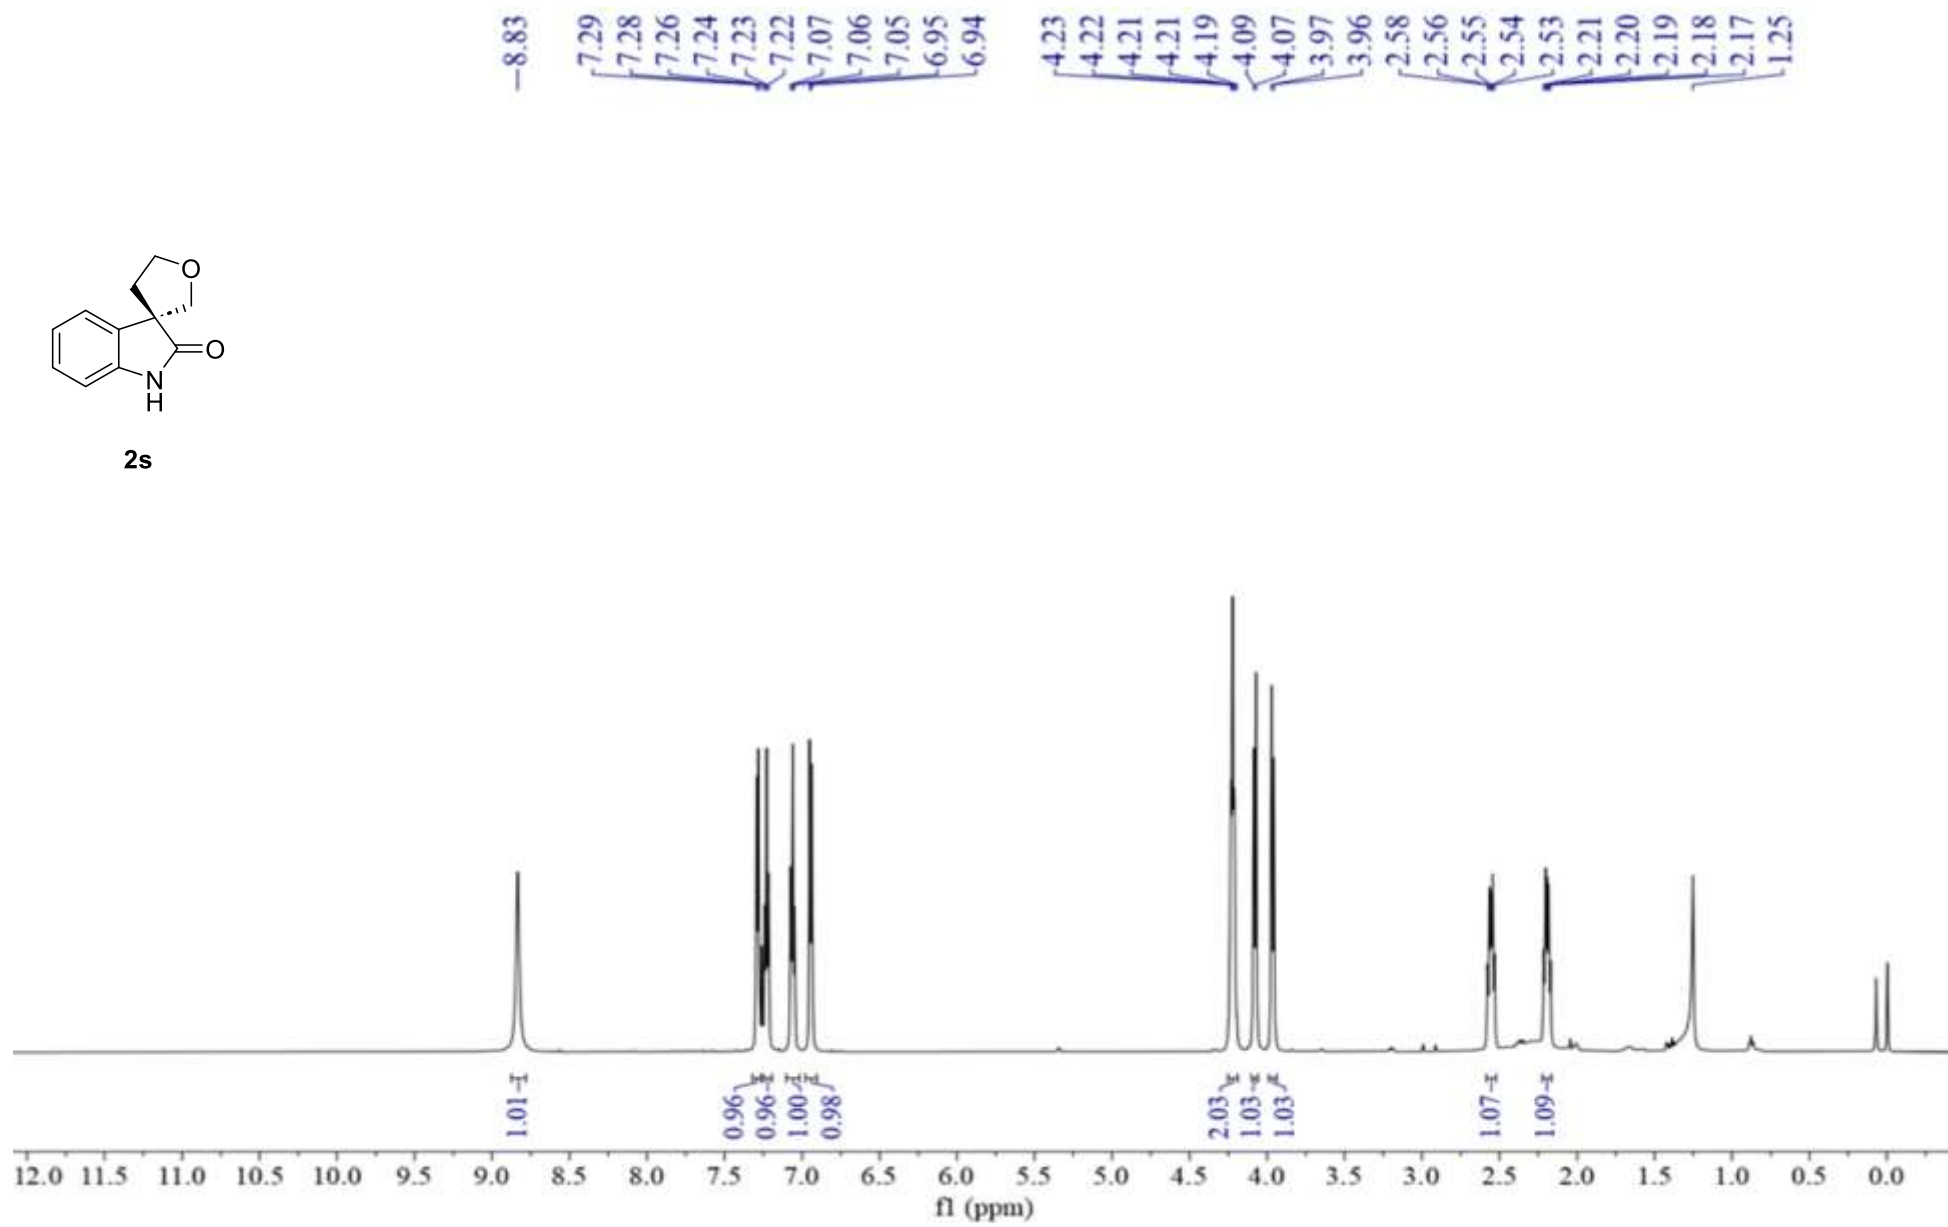

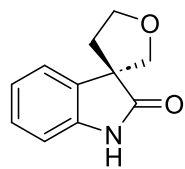

**2s**

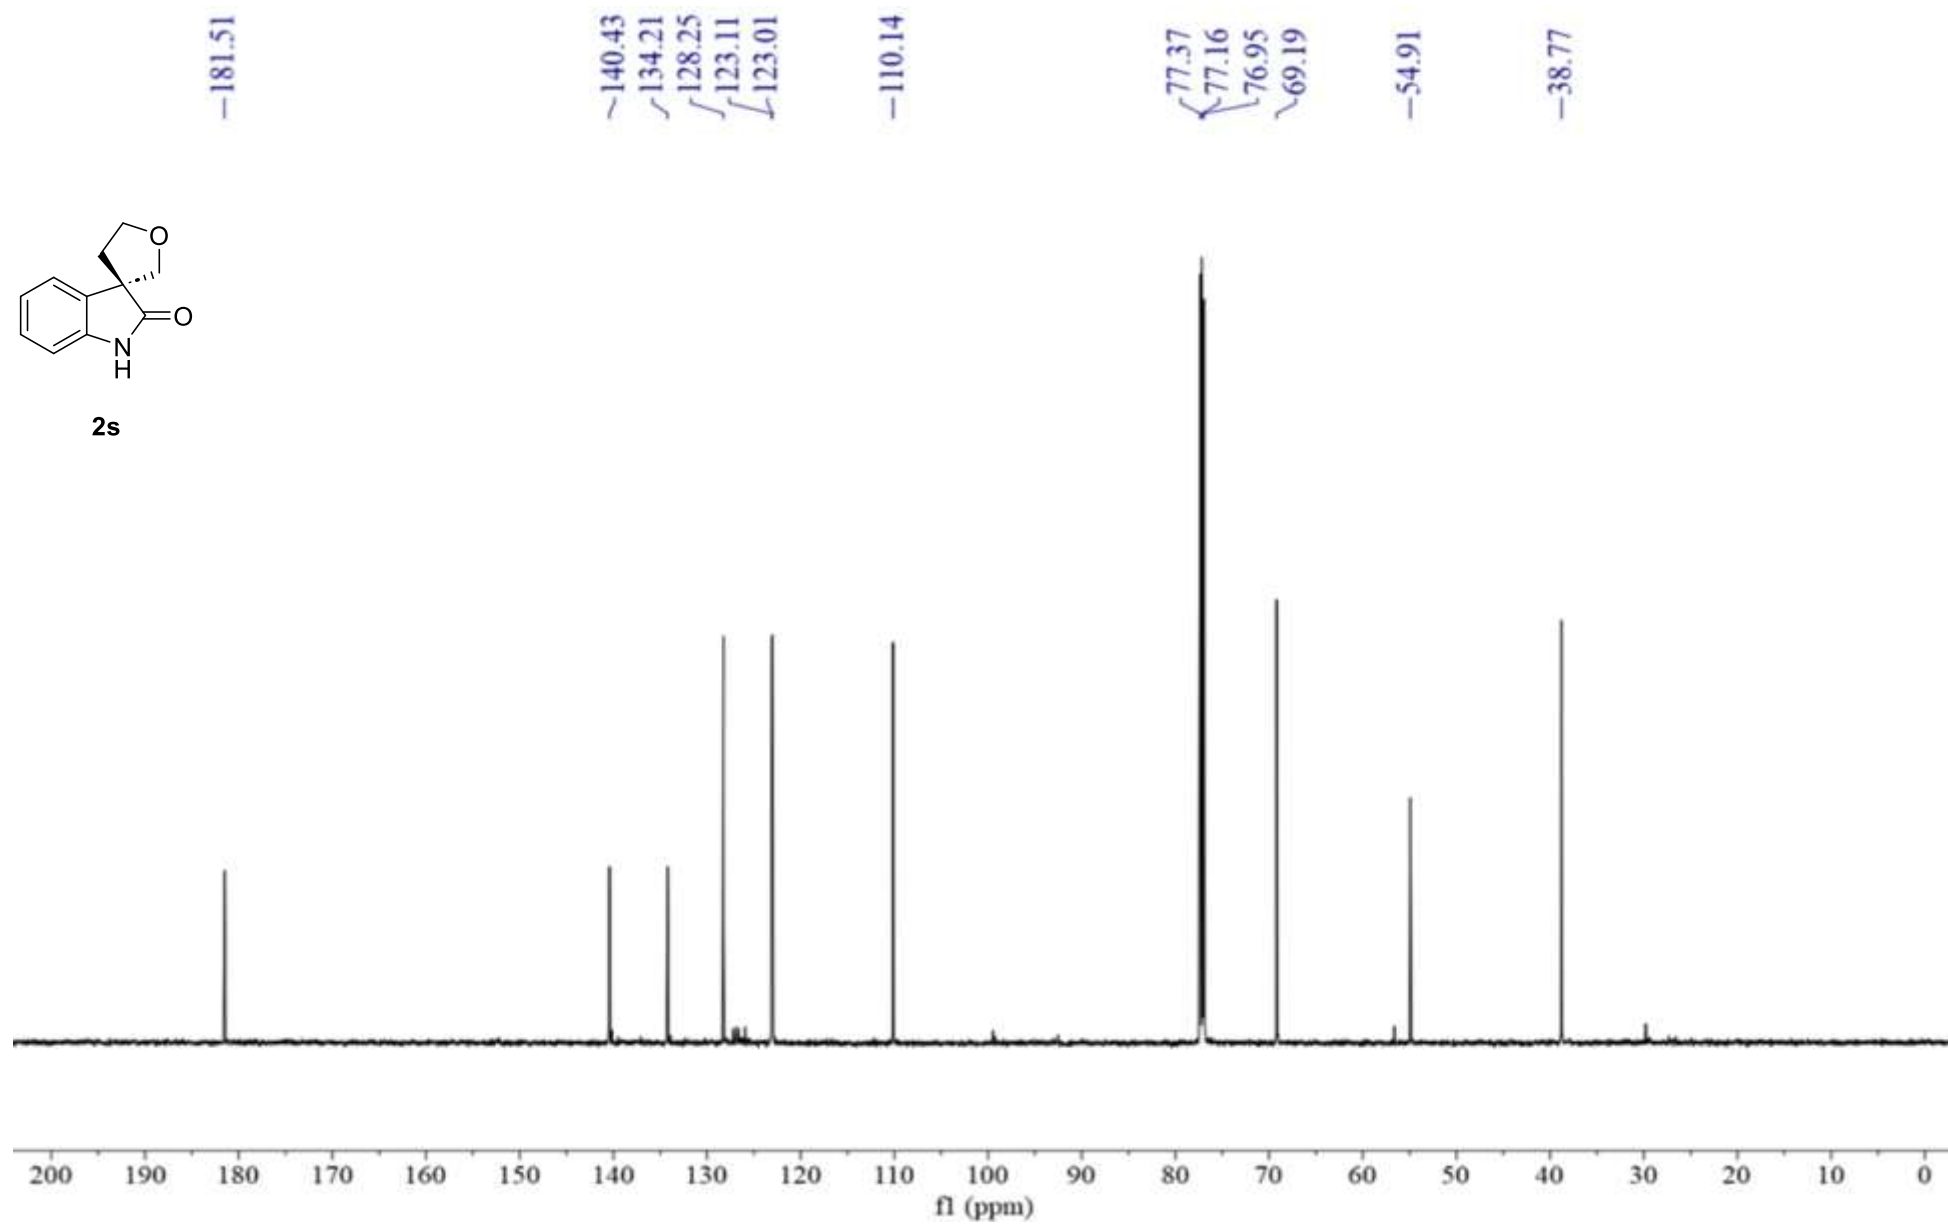

9.38  
7.26  
7.03  
7.03  
7.02  
7.02  
6.94  
6.94  
6.93  
6.92  
6.91  
6.91  
6.90  
6.89  
6.88  
6.87  
4.24  
4.22  
4.22  
4.21  
4.21  
4.21  
4.20  
4.20  
4.19  
4.18  
4.17  
4.06  
4.04  
3.95  
3.94  
2.58  
2.57  
2.57  
2.56  
2.56  
2.55  
2.55  
2.54  
2.20  
2.19  
2.18  
2.18  
2.17  
2.17  
2.16  
2.15

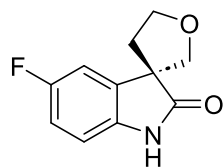

2t

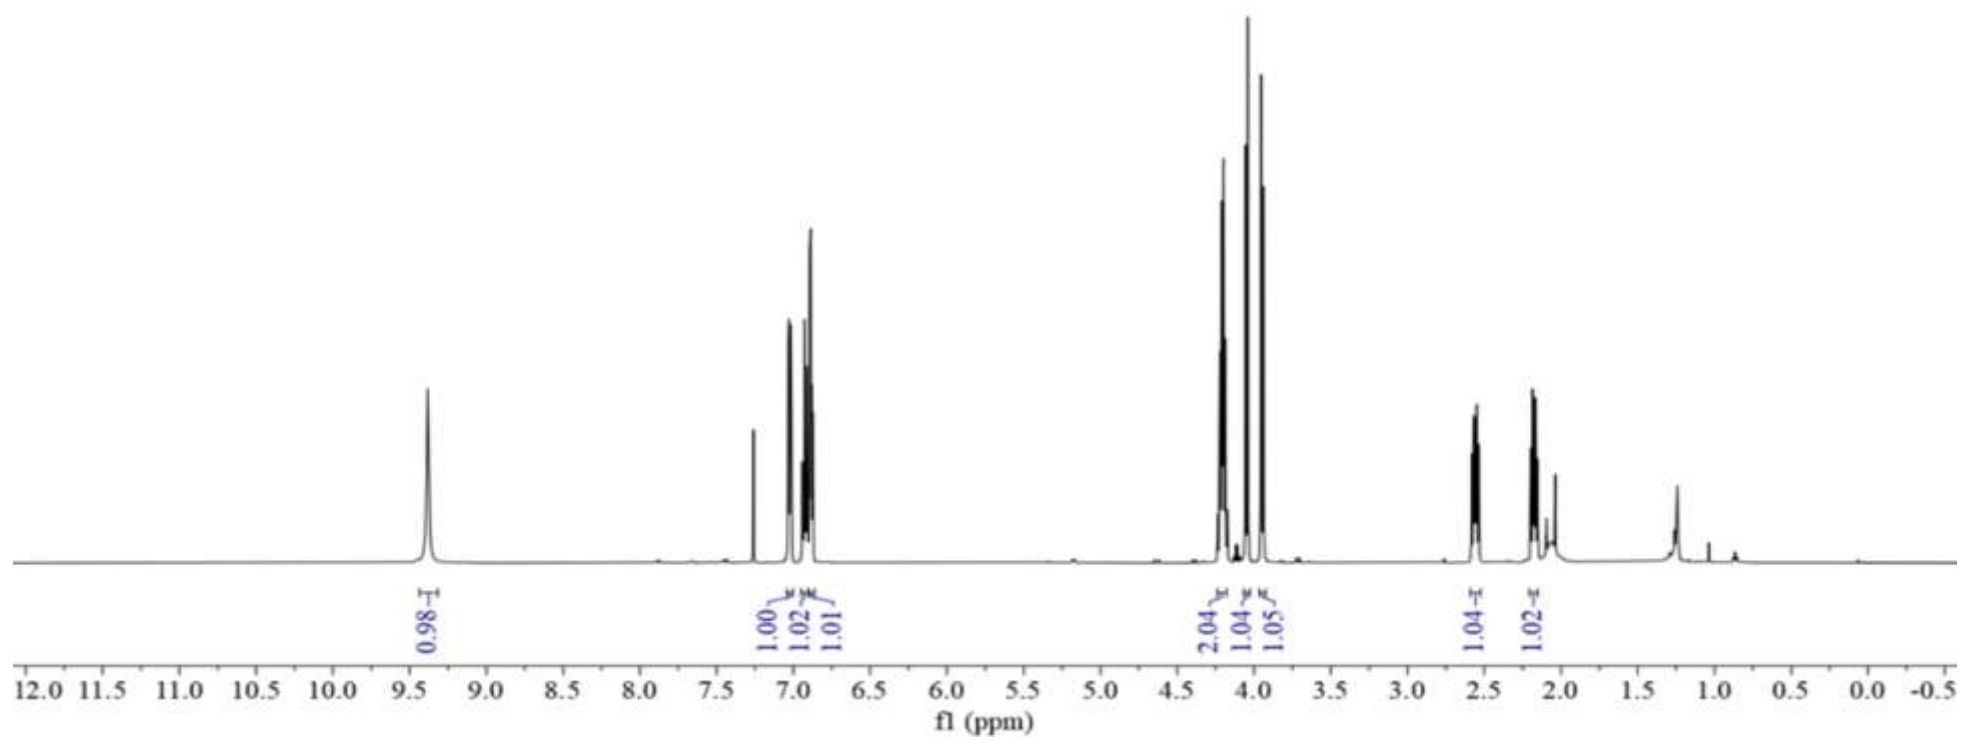

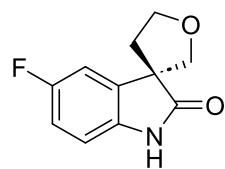

2t

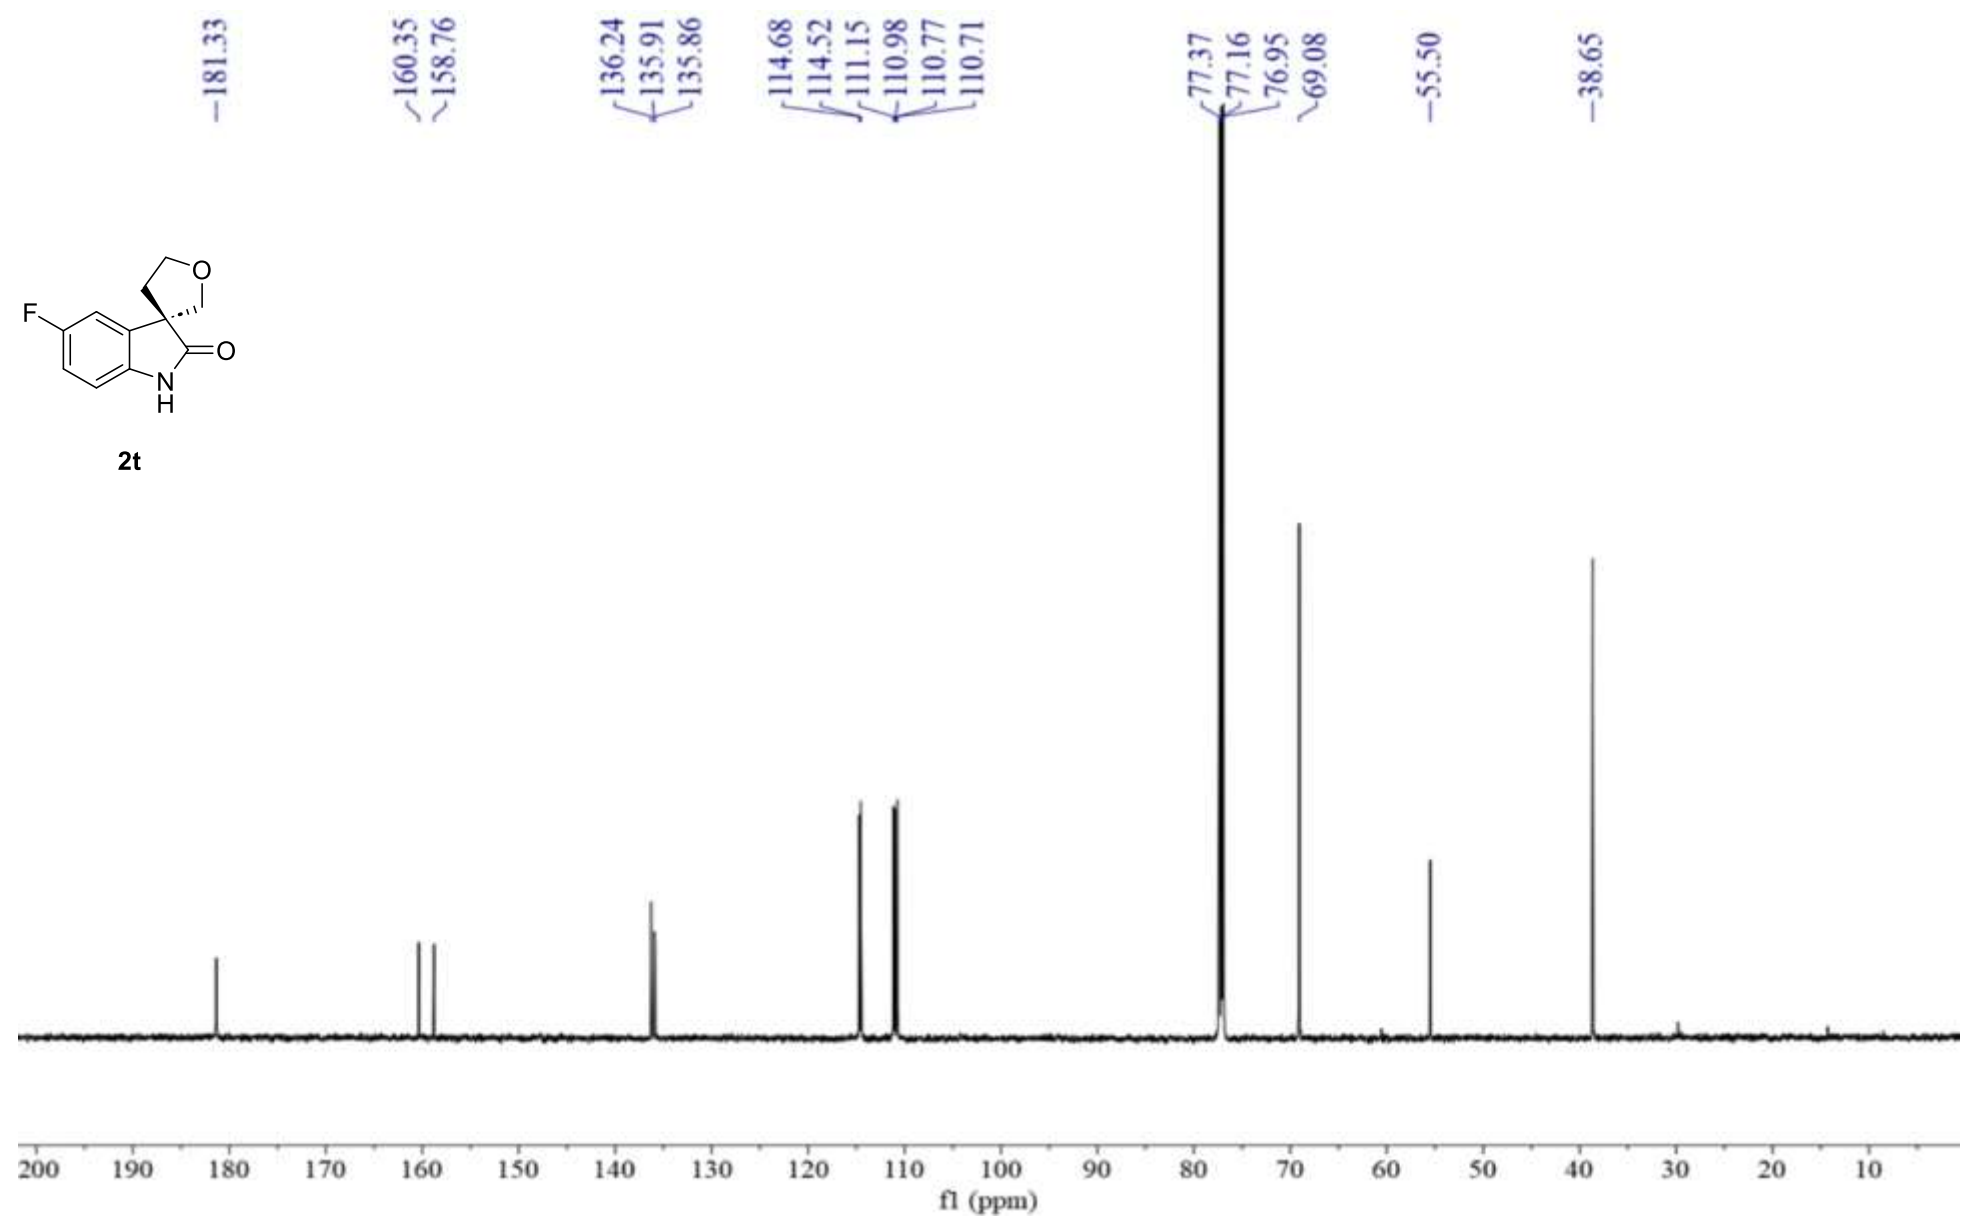

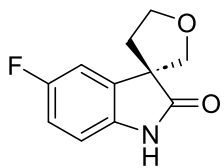

2t

--119.66

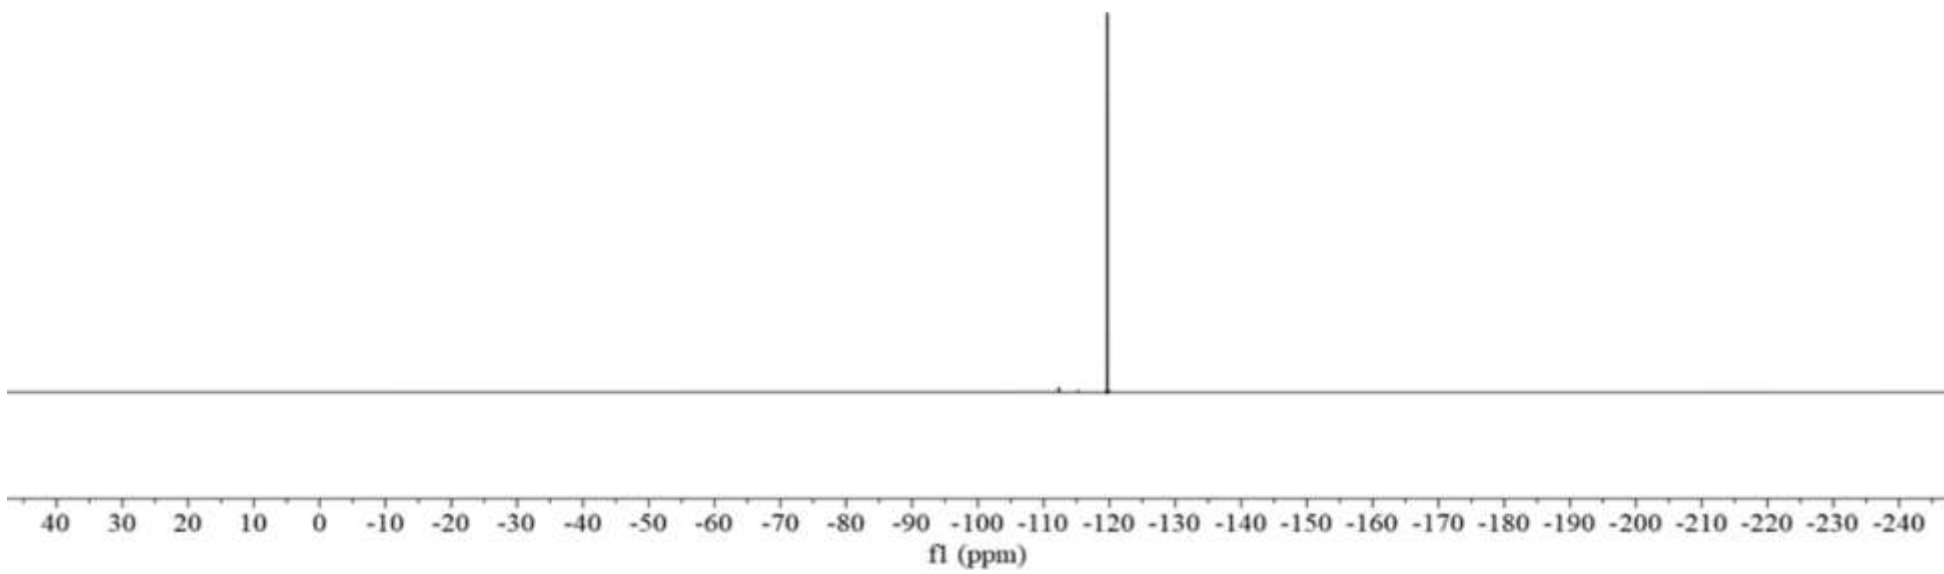

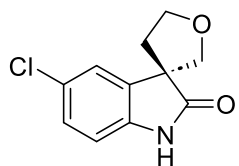

2u

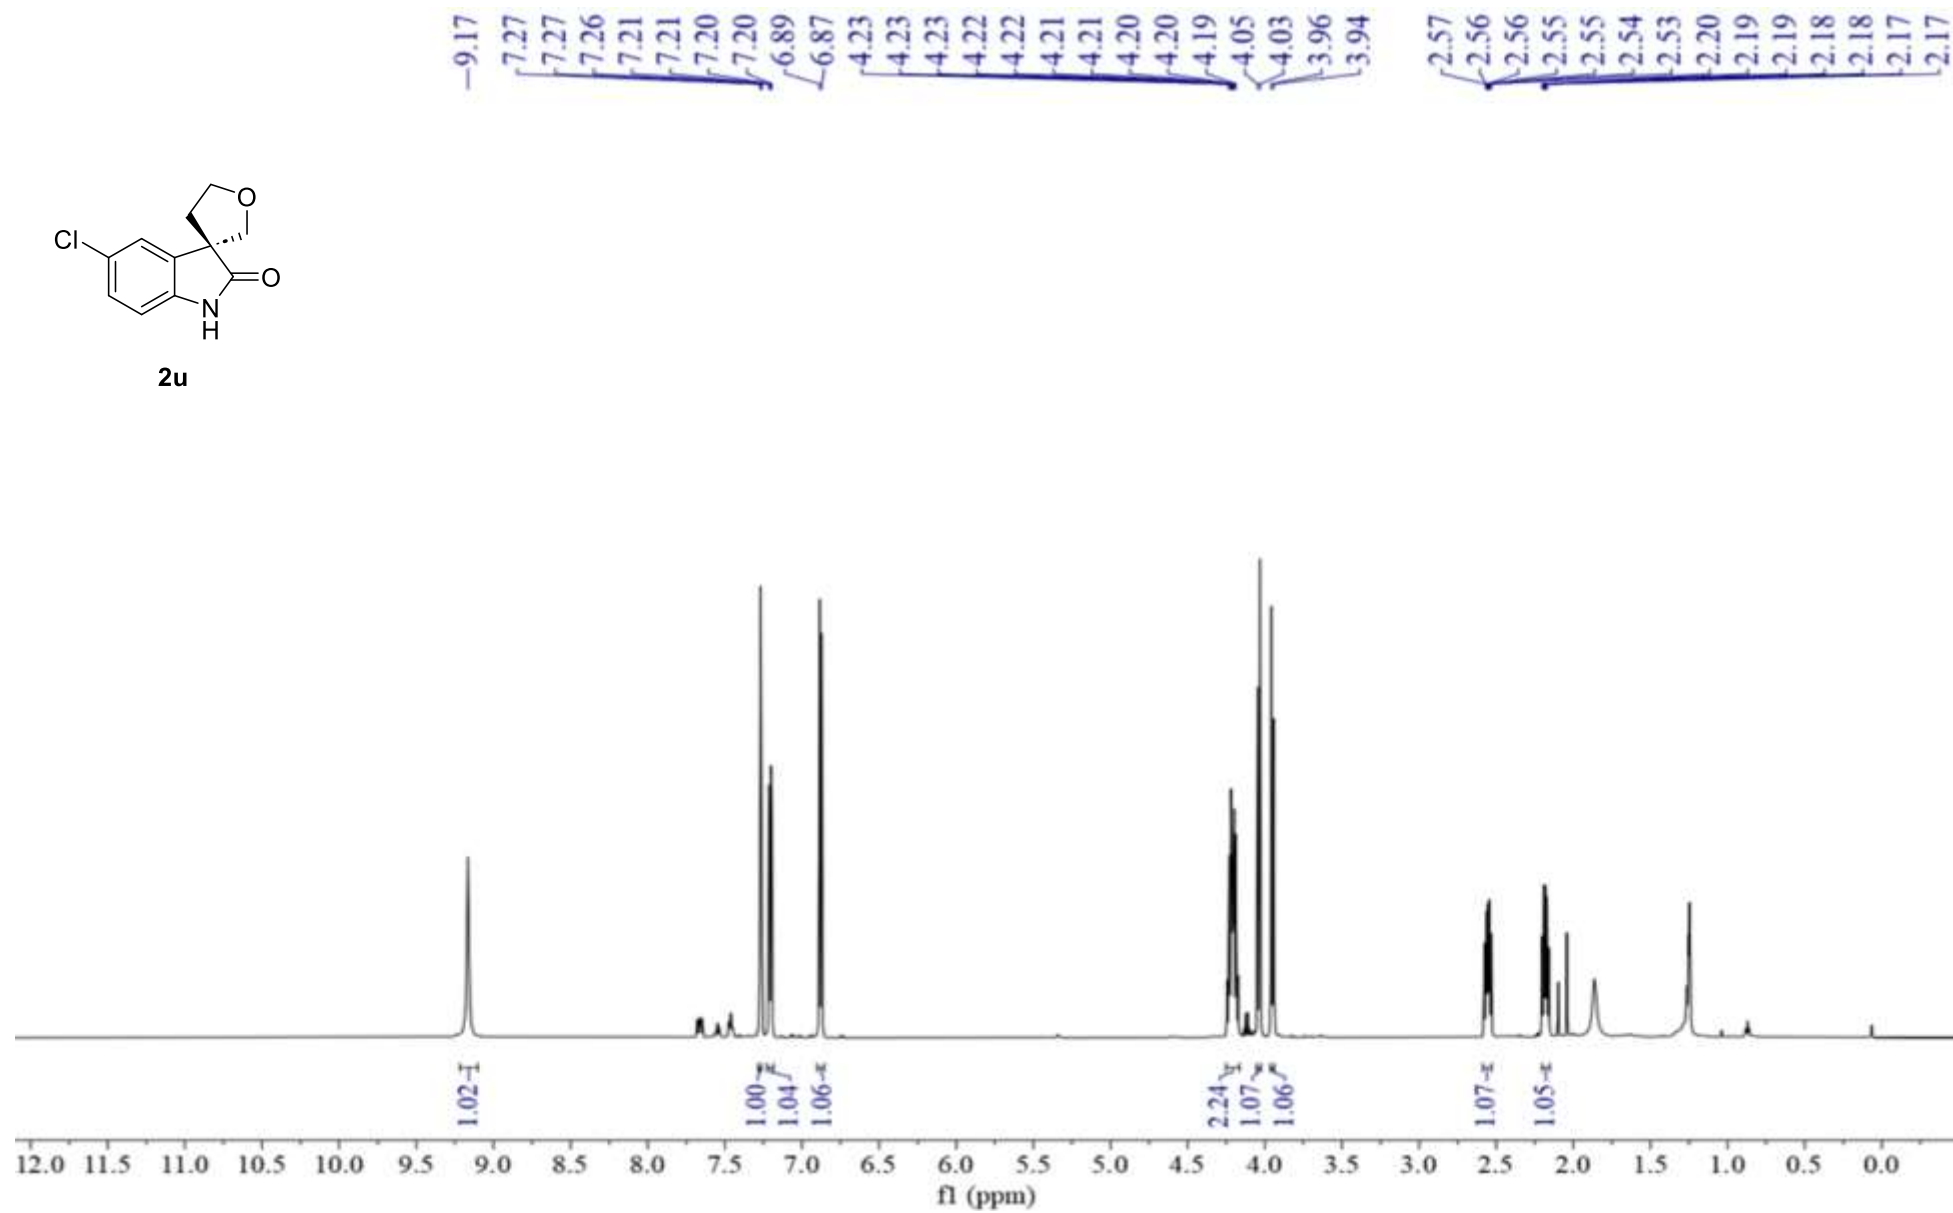

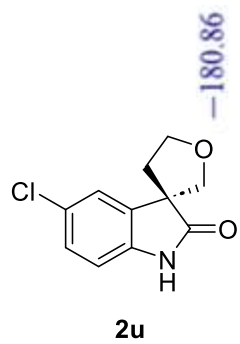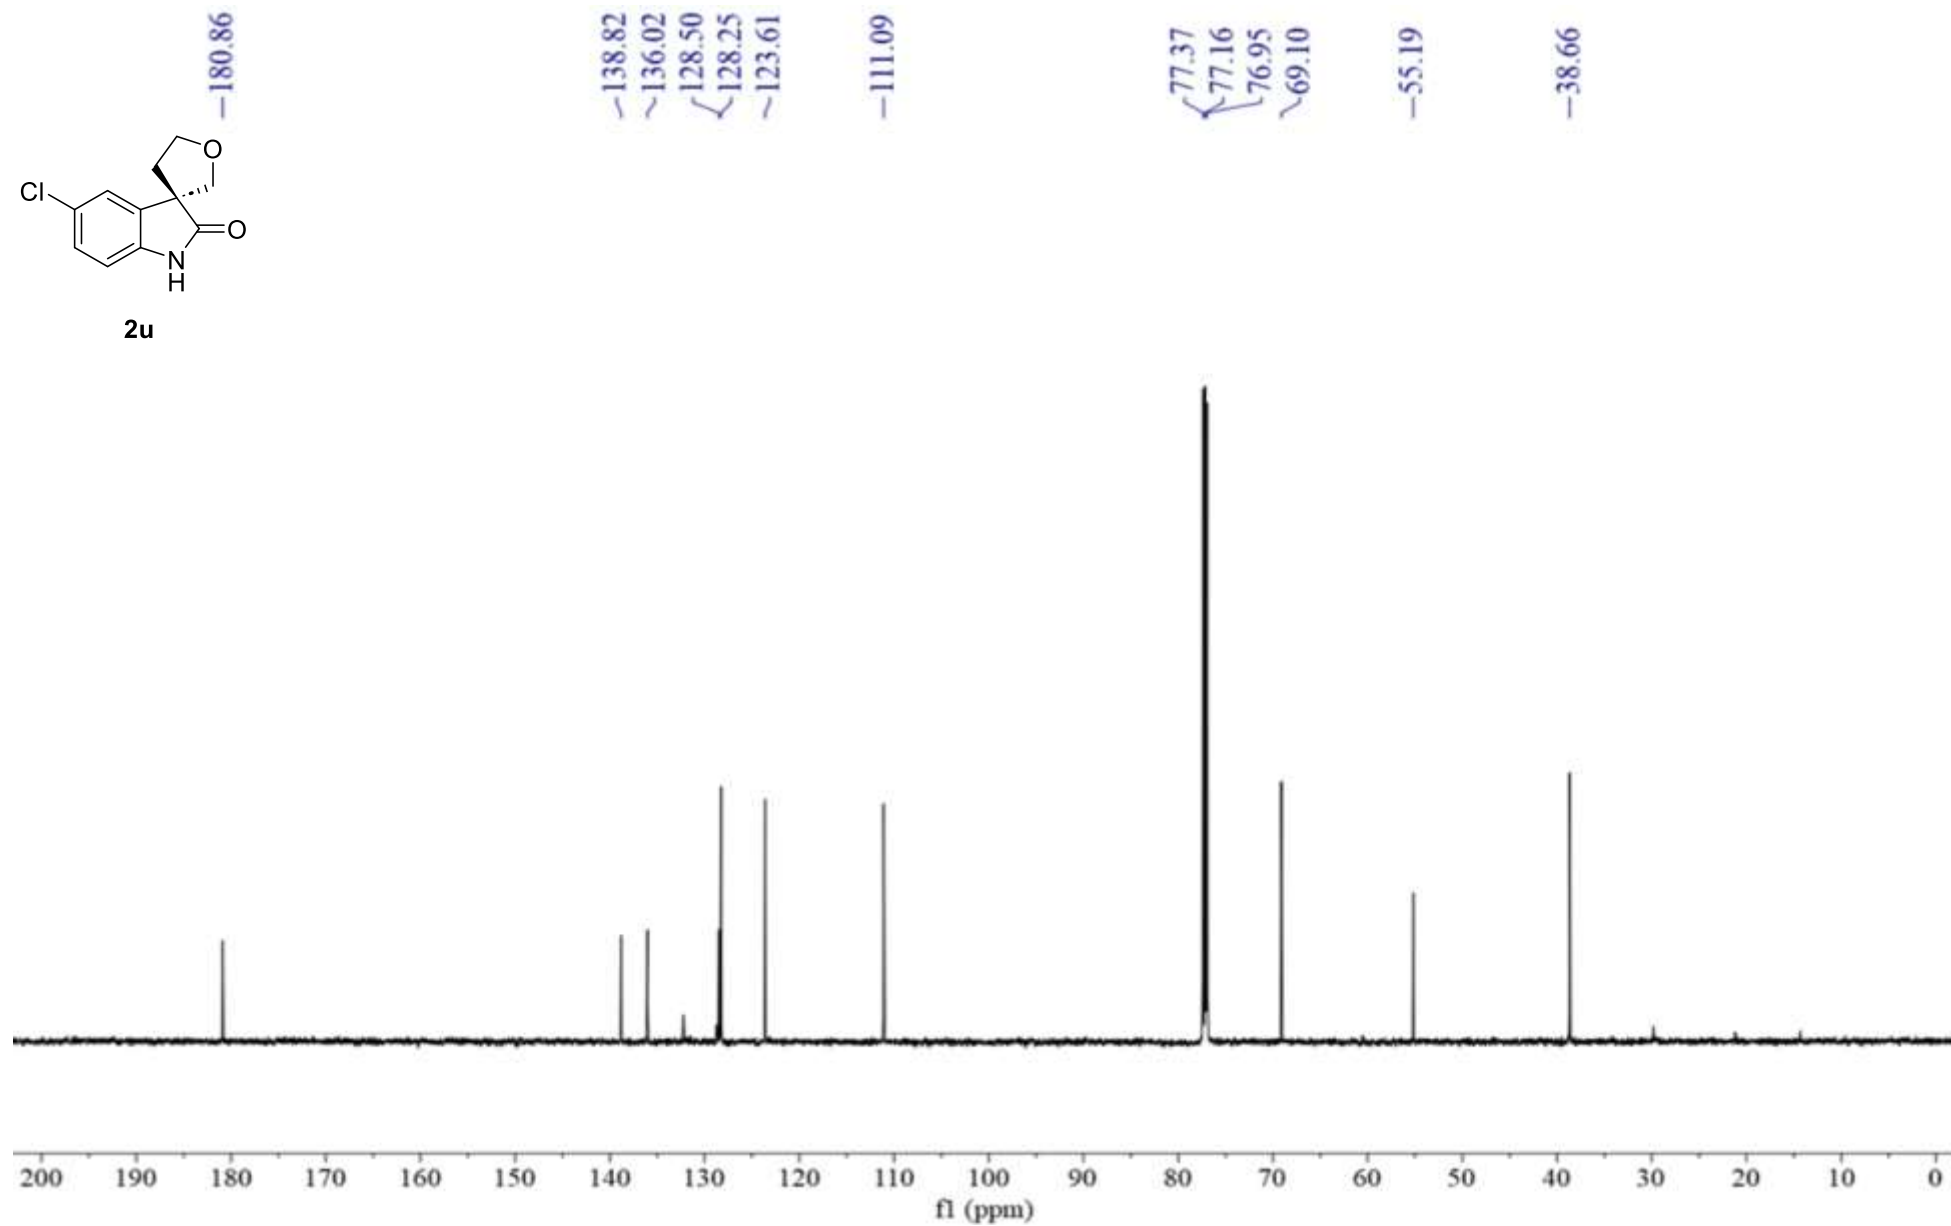

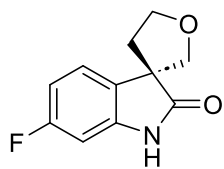

2v

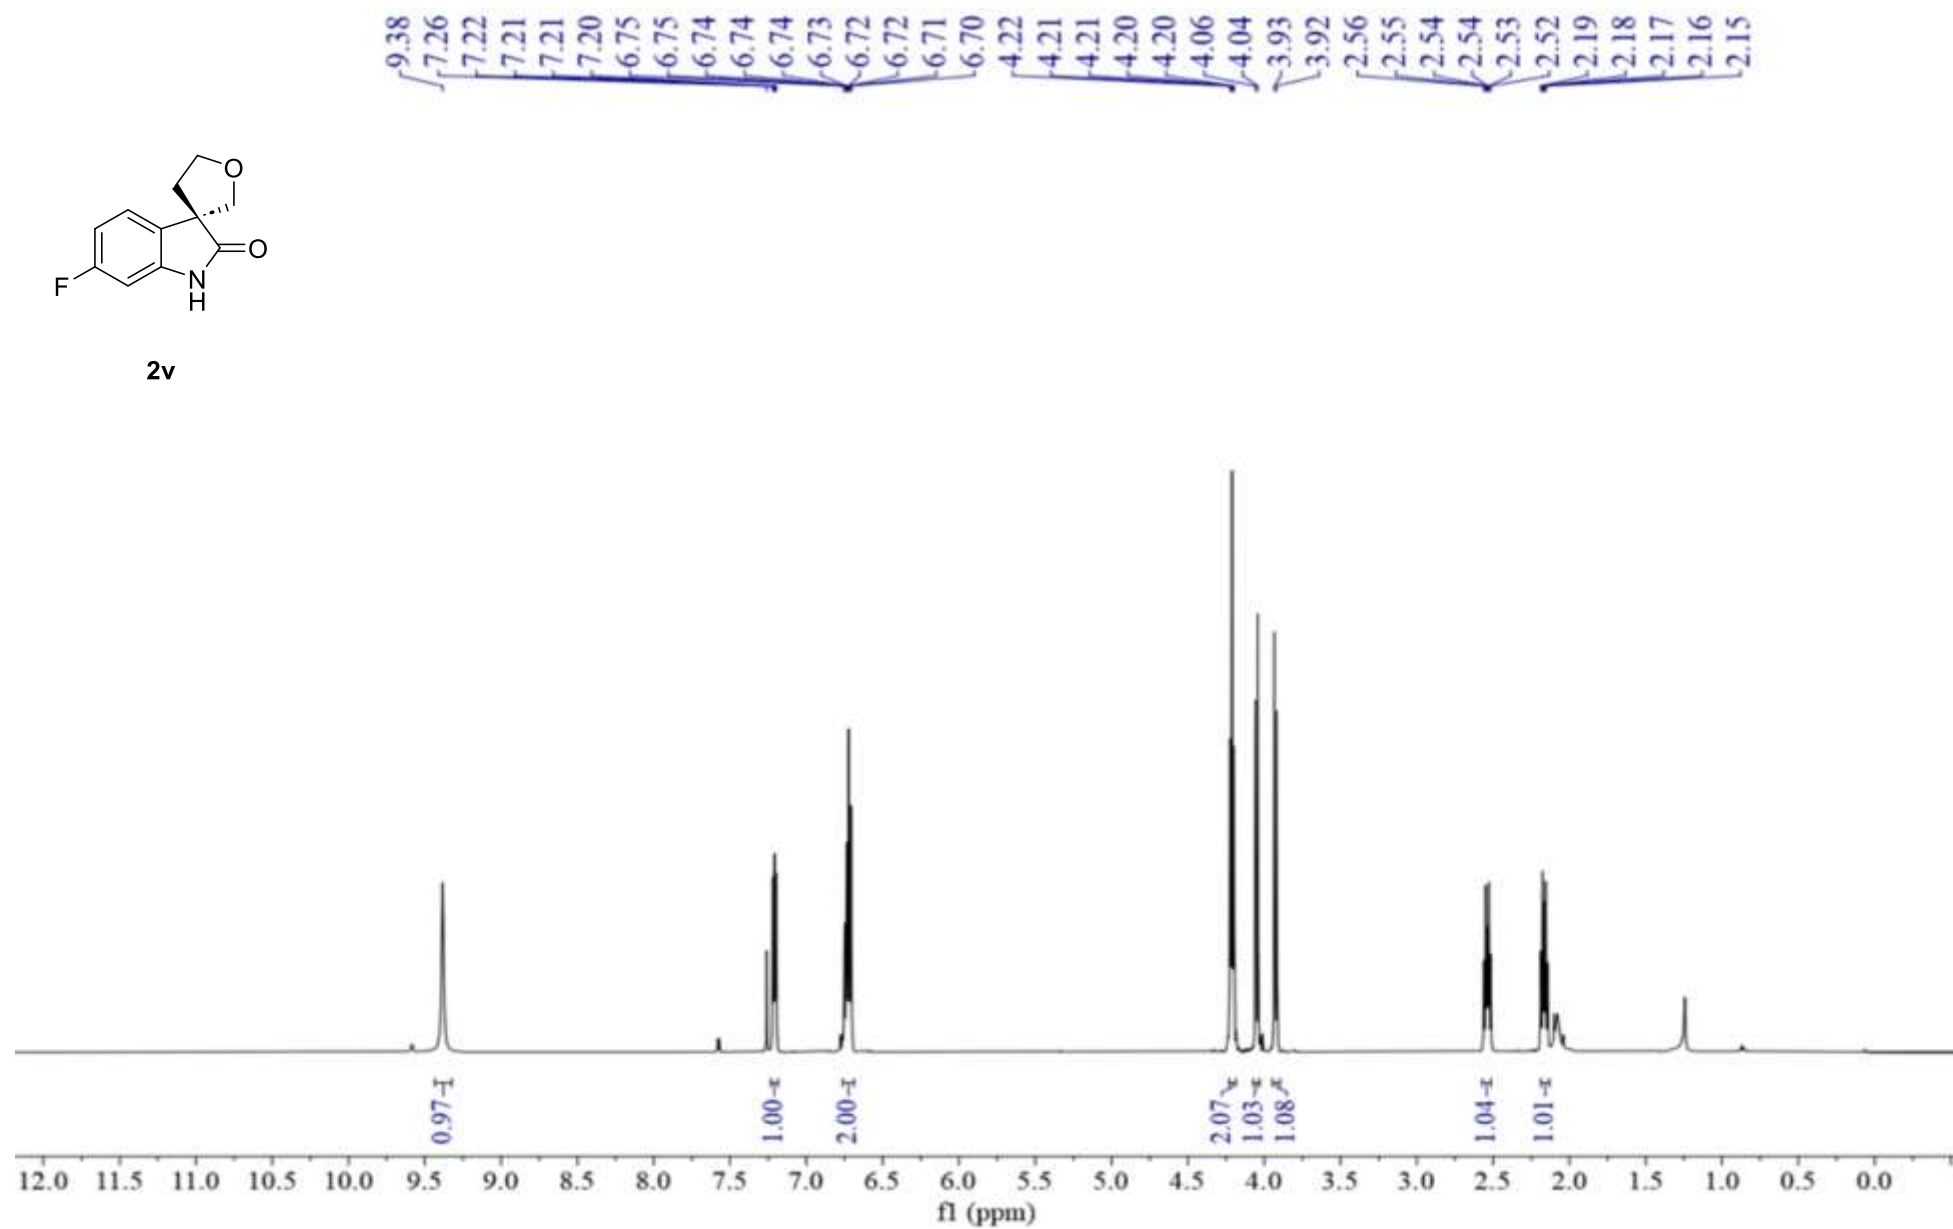

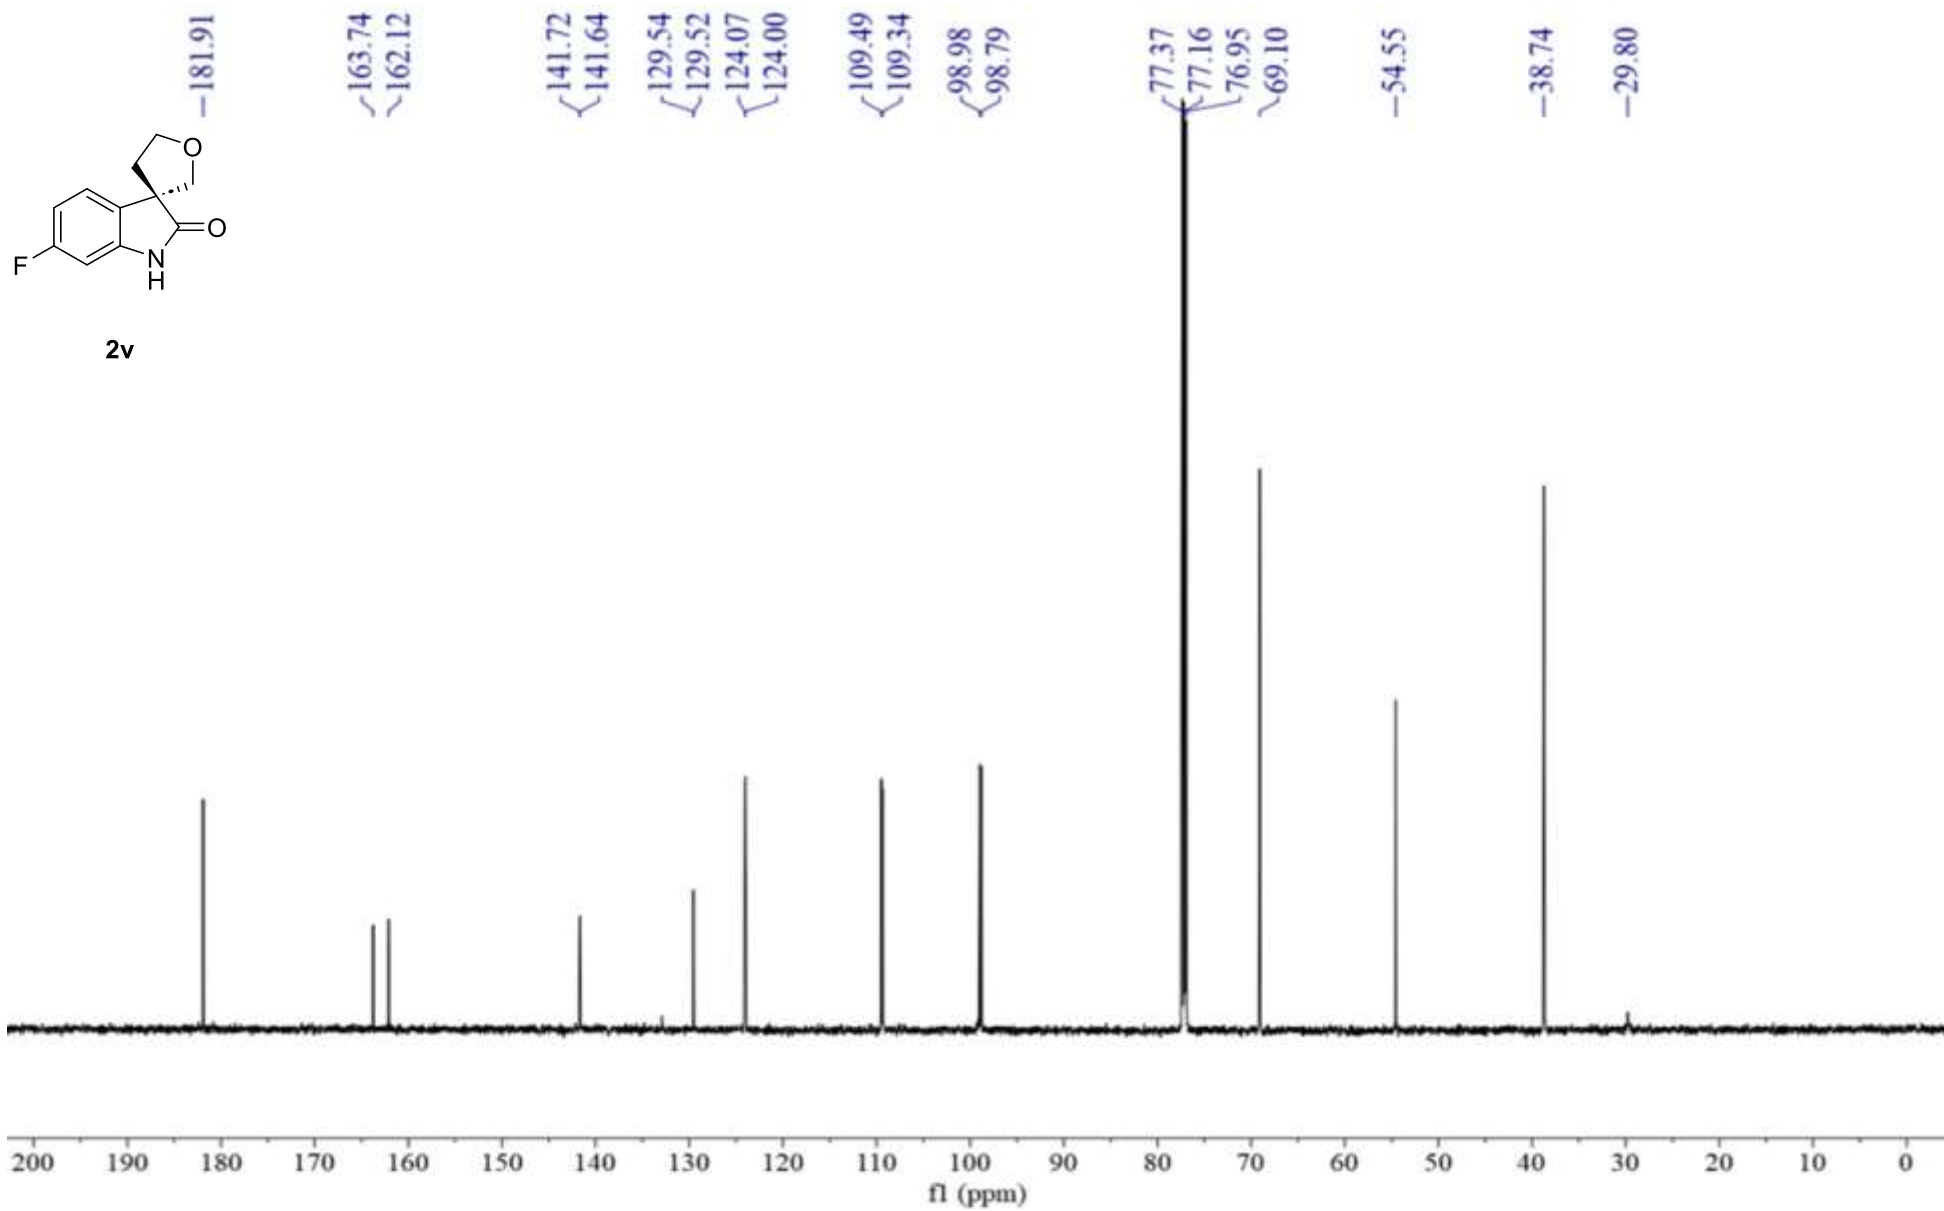

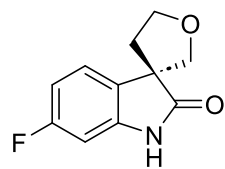

2v

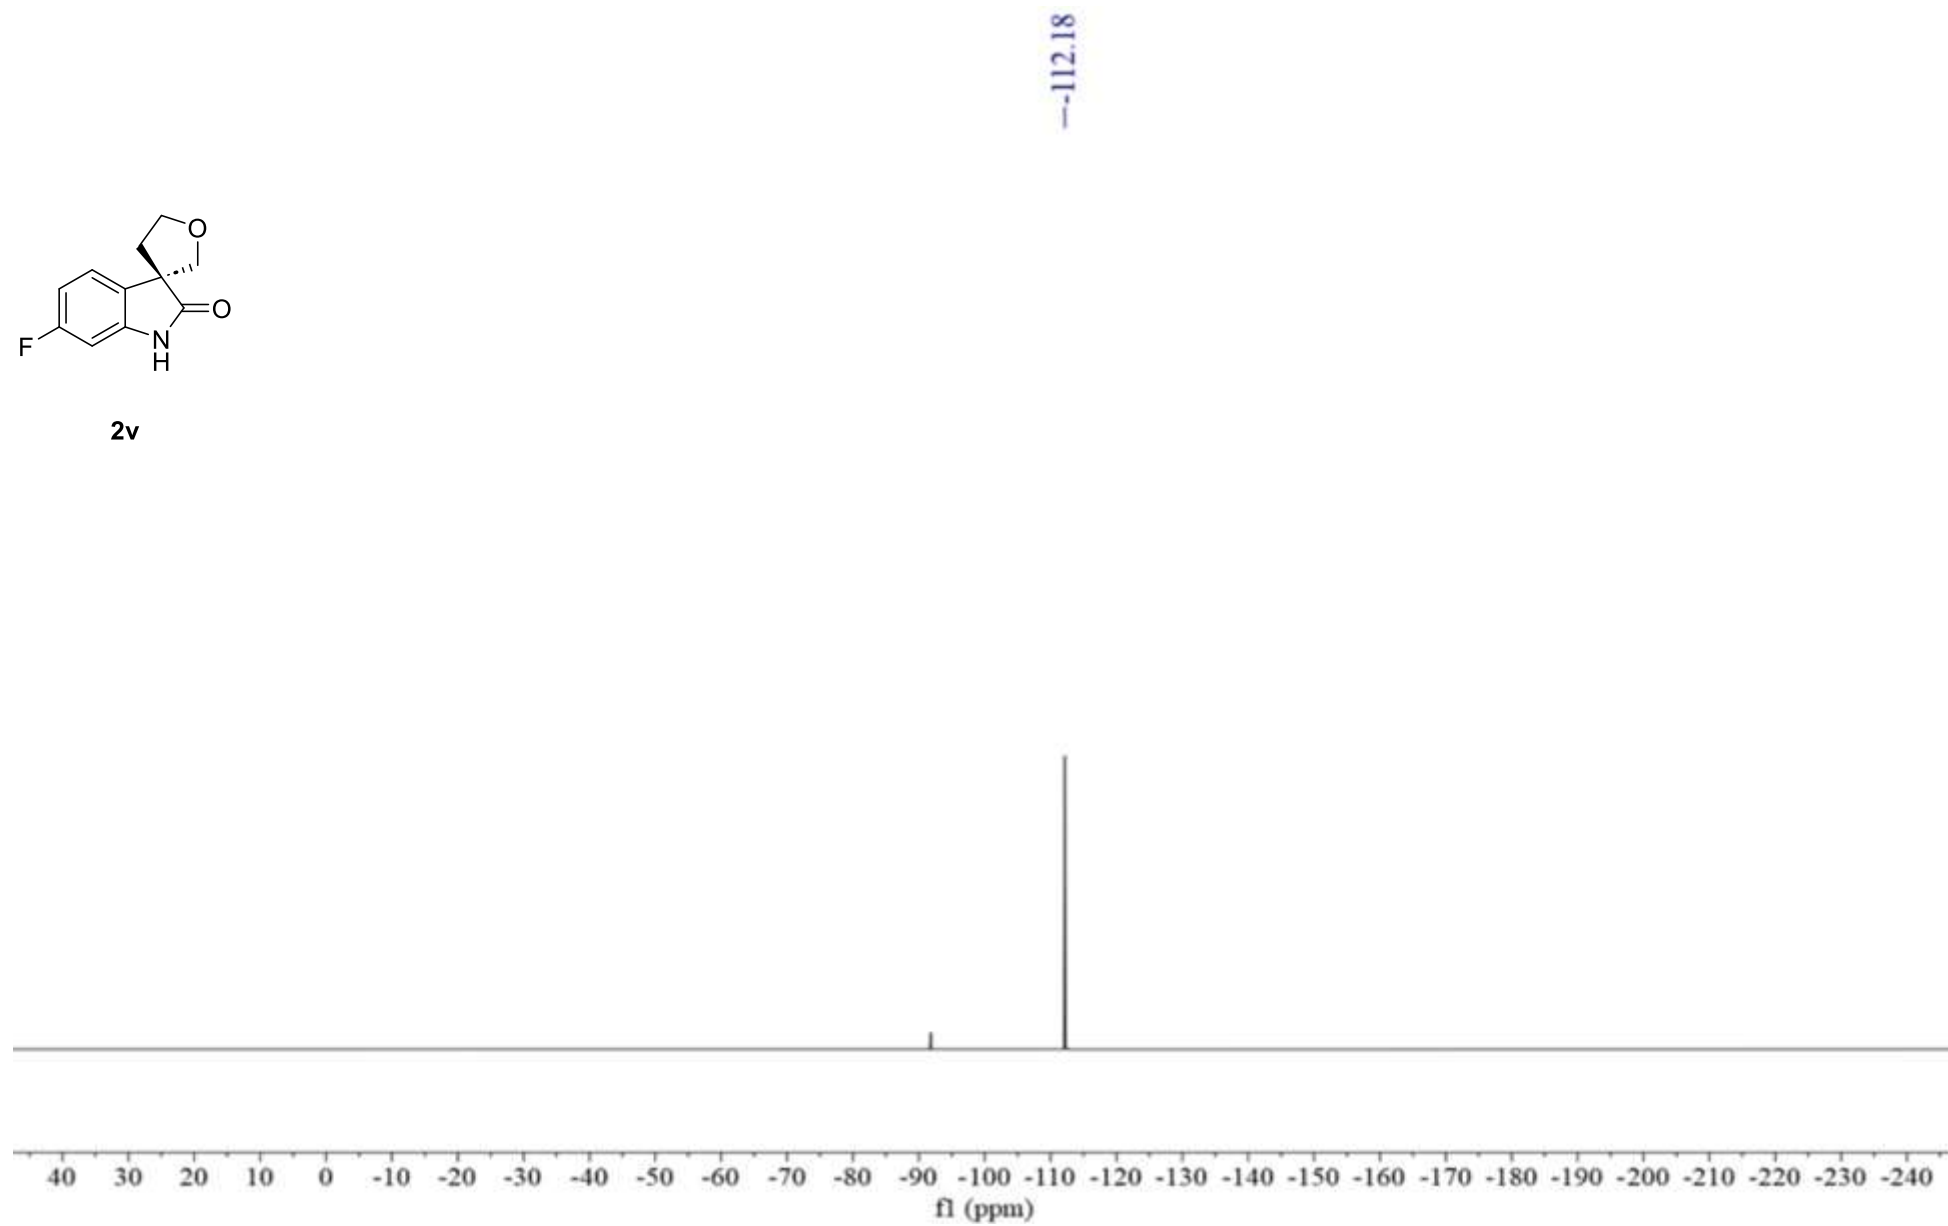

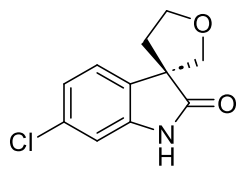

2w

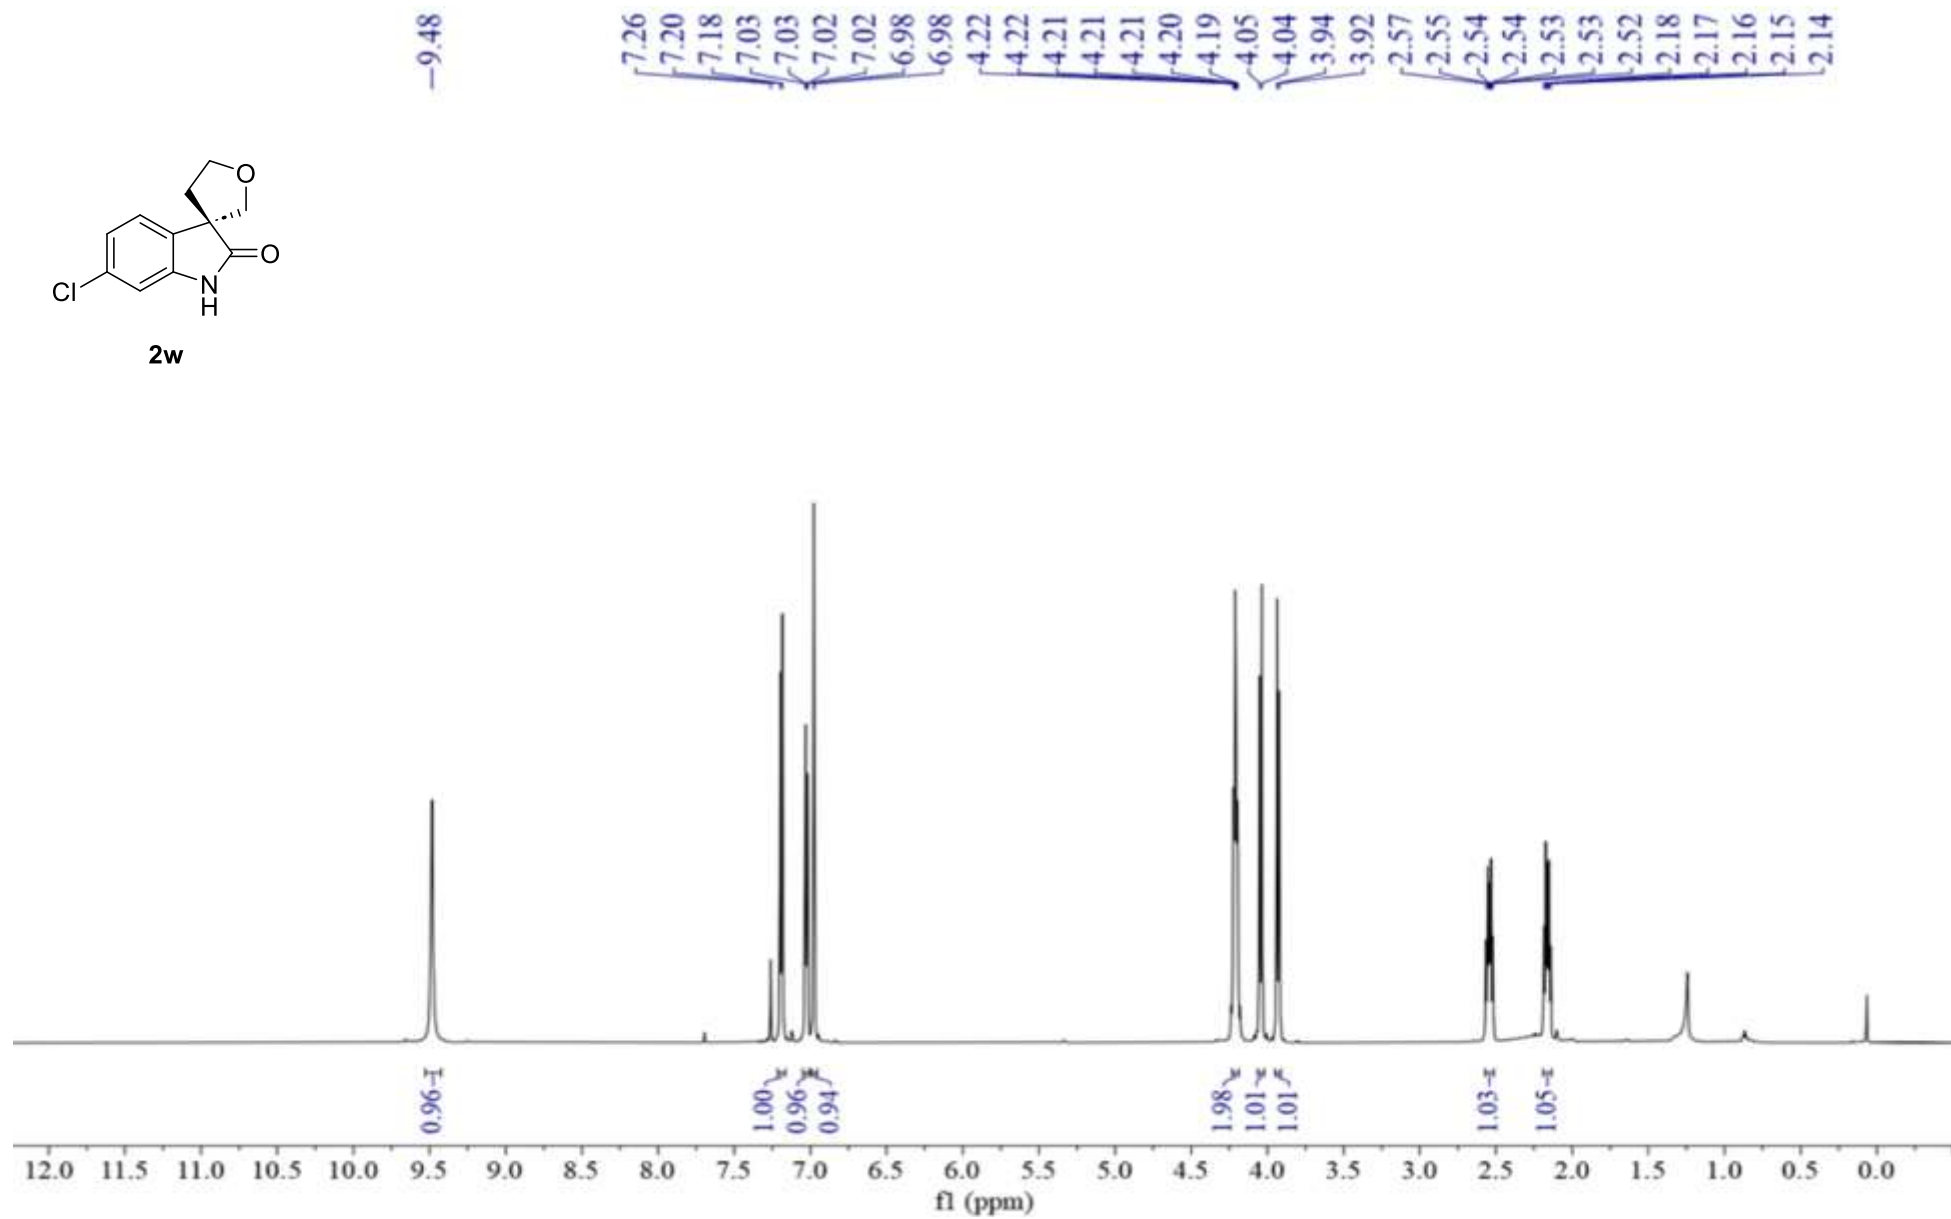

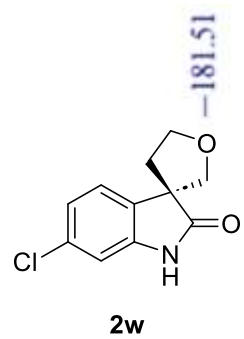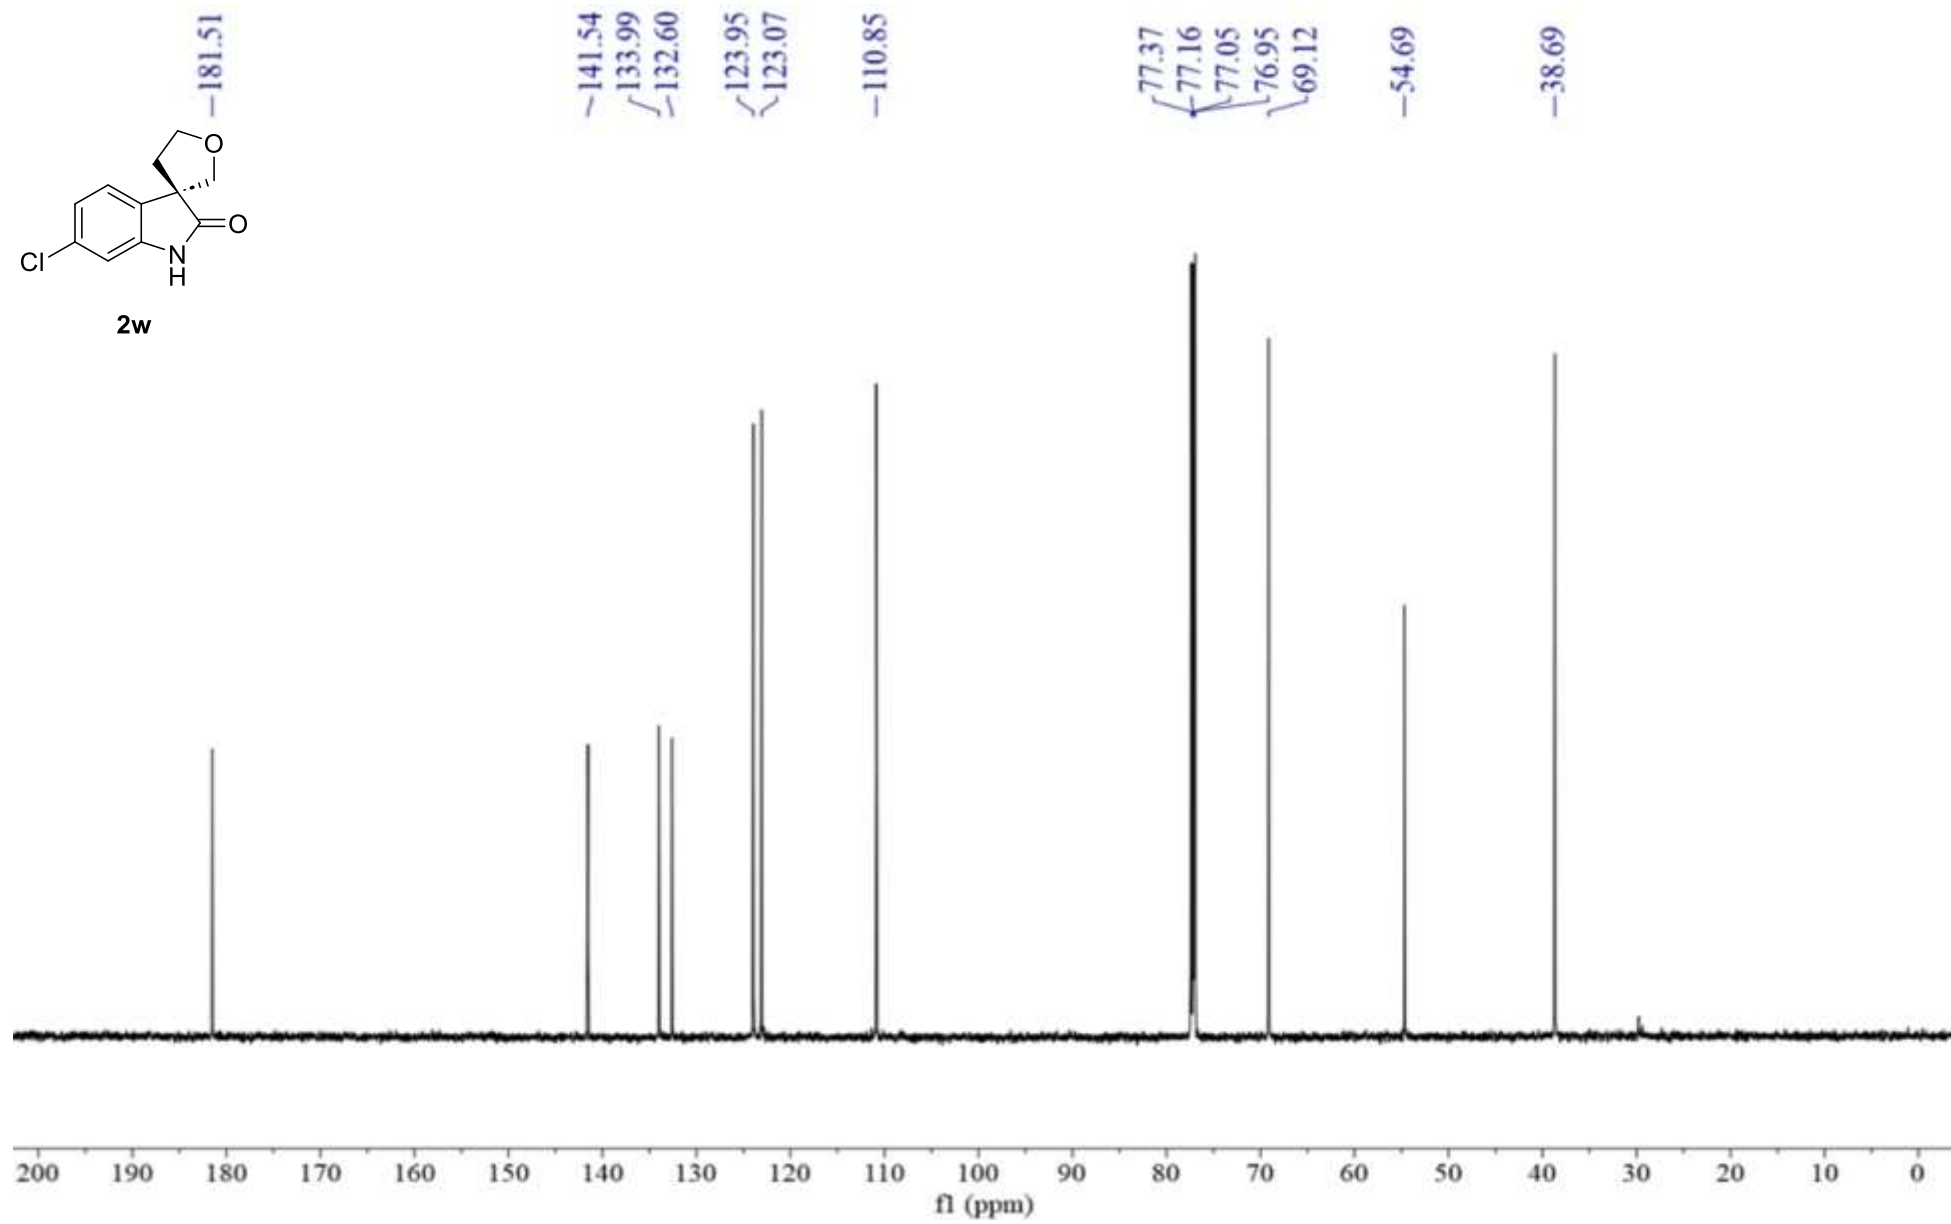

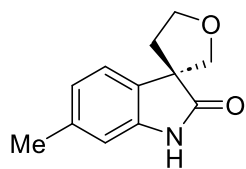

2x

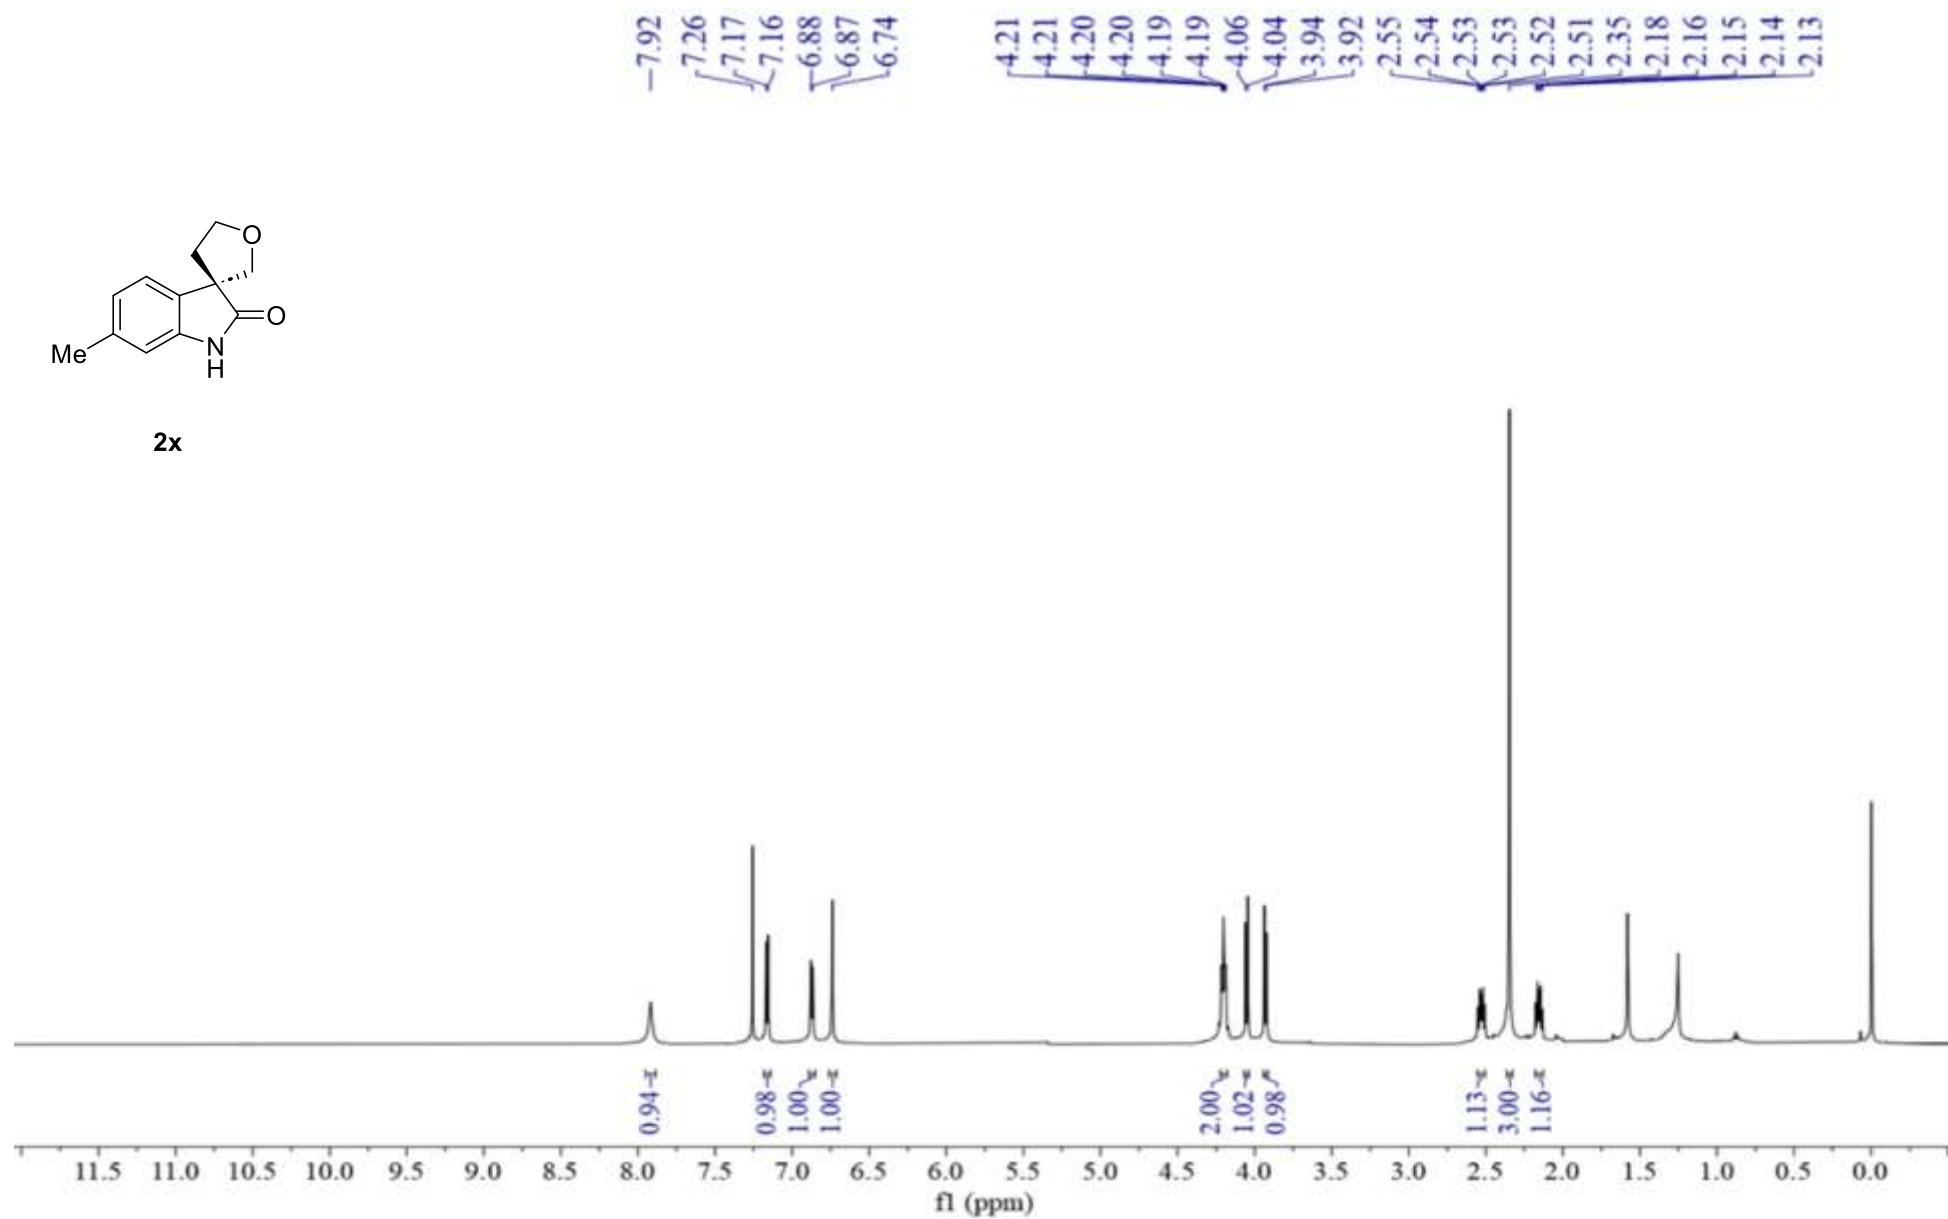

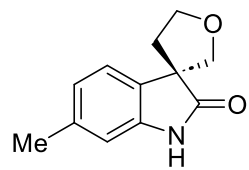

2x

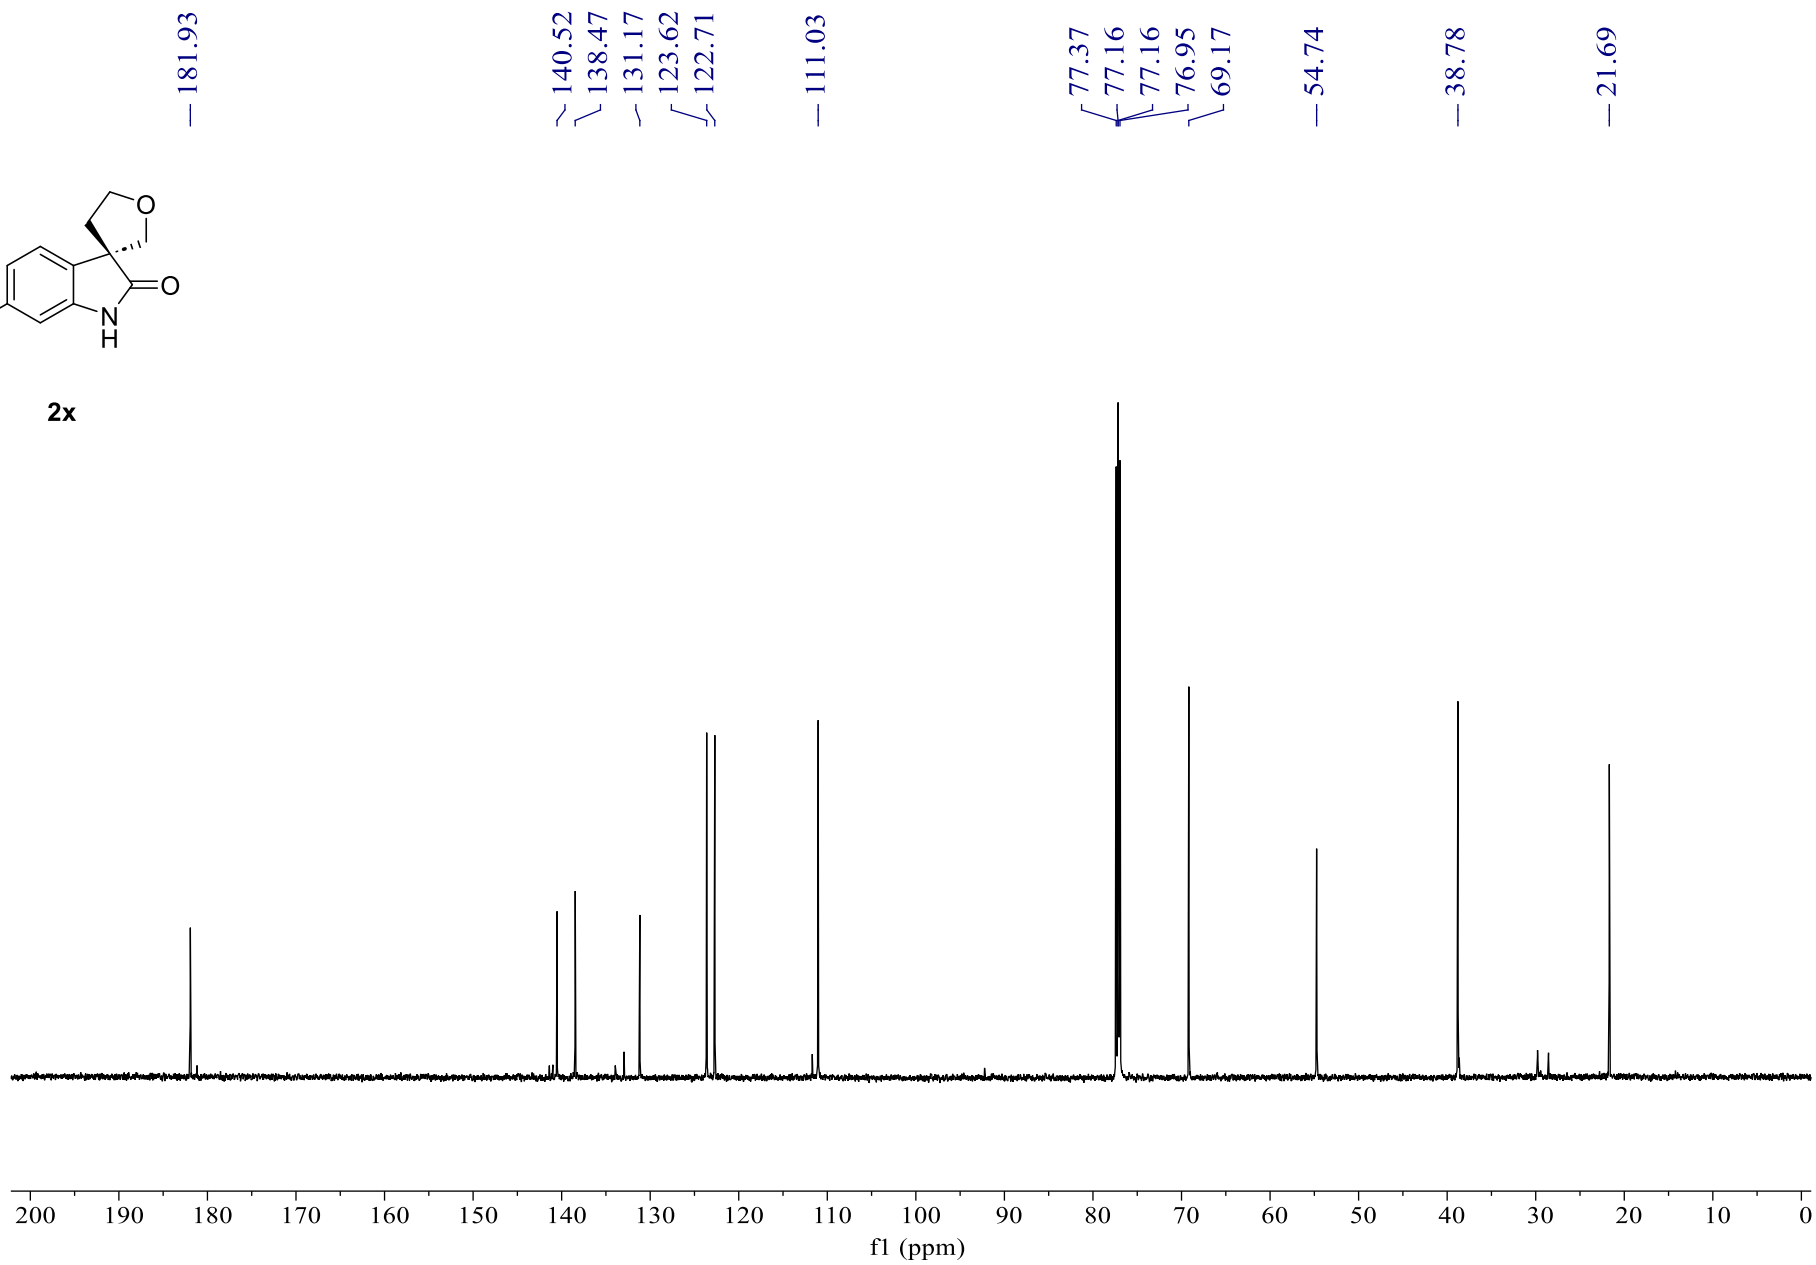

S-98

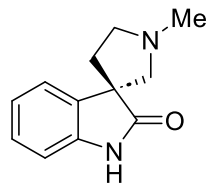

(-)-Coerulescine 5

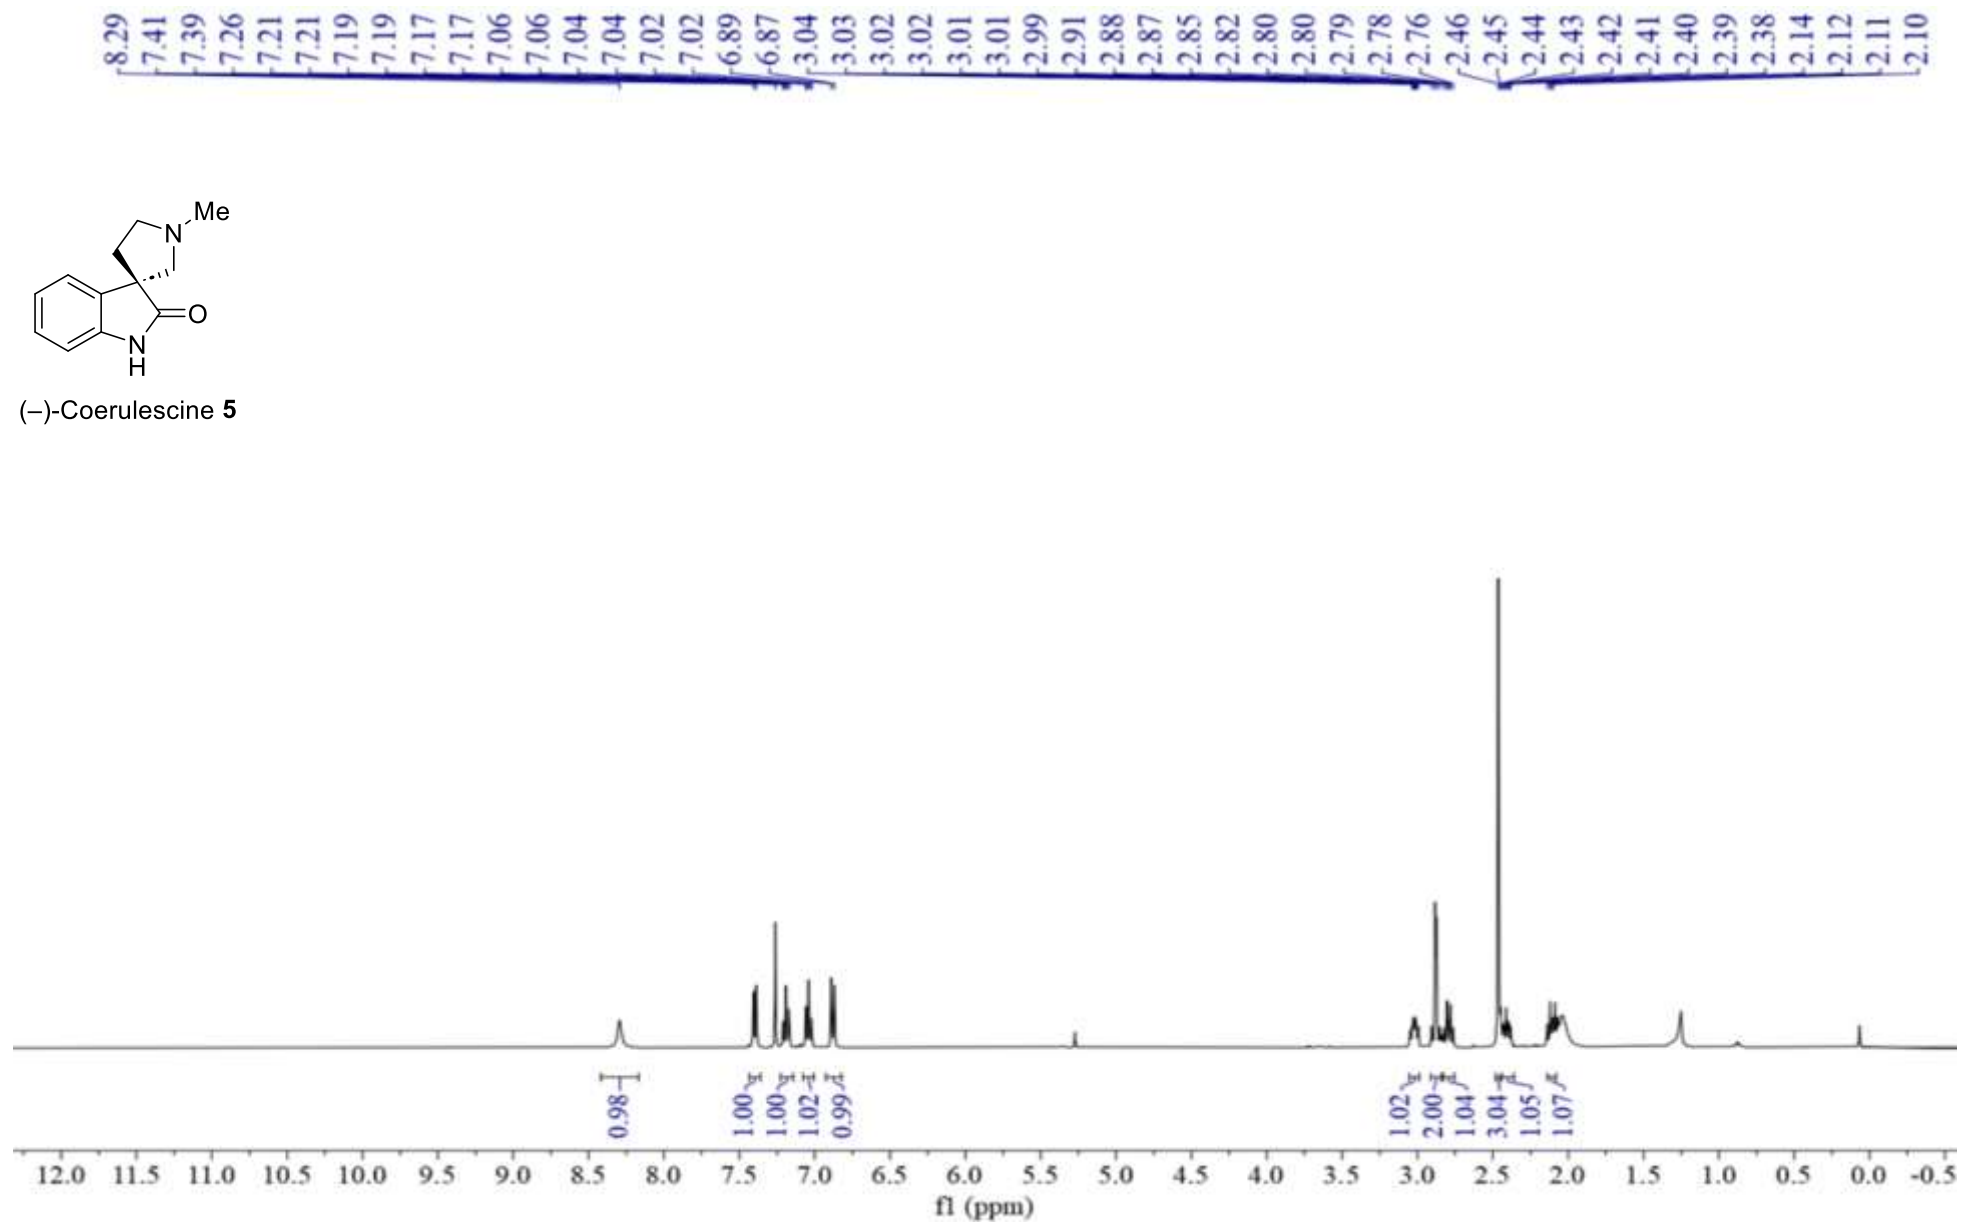

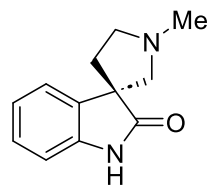

(-)-Coerulescine 5

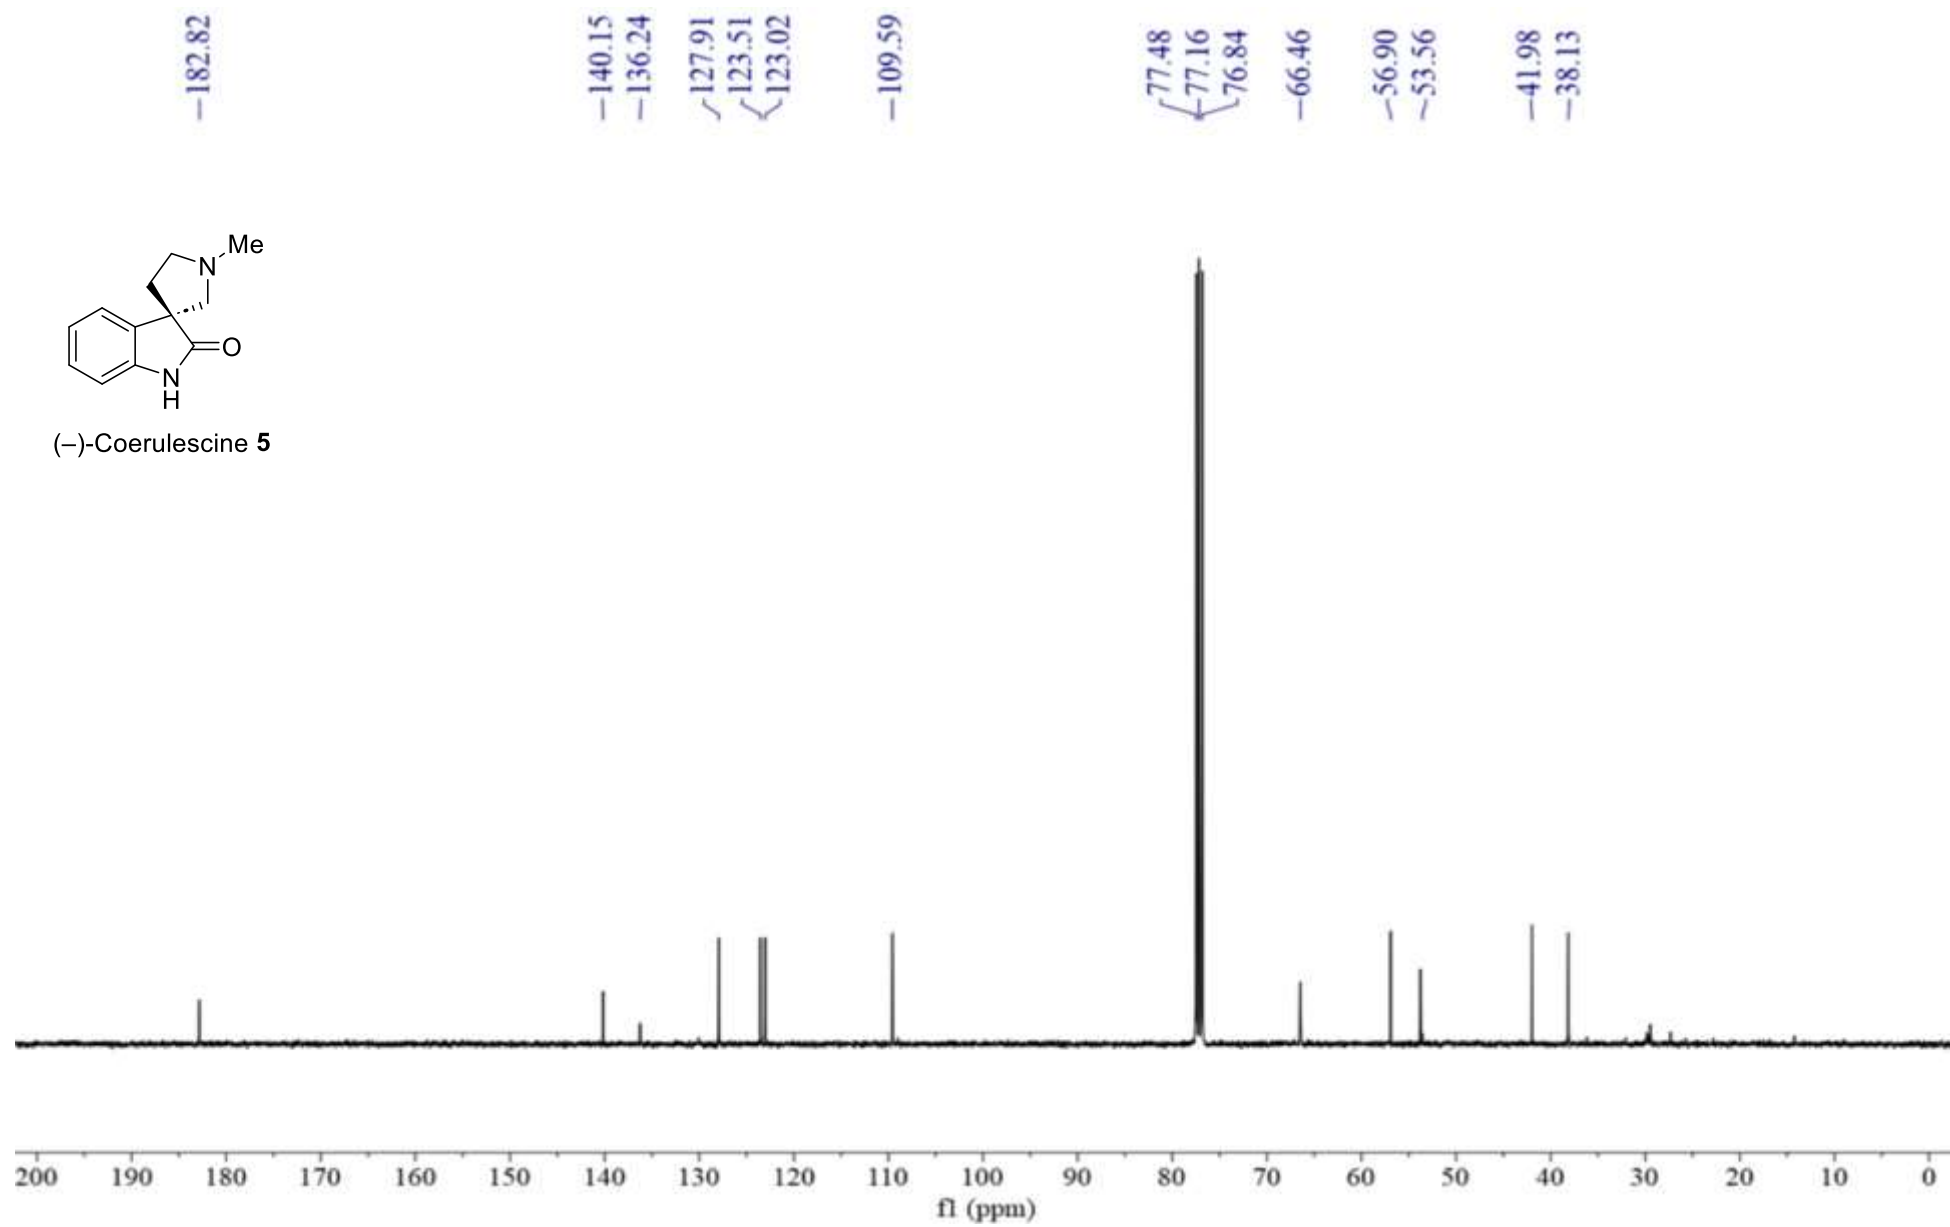

### HPLC Chromatograms

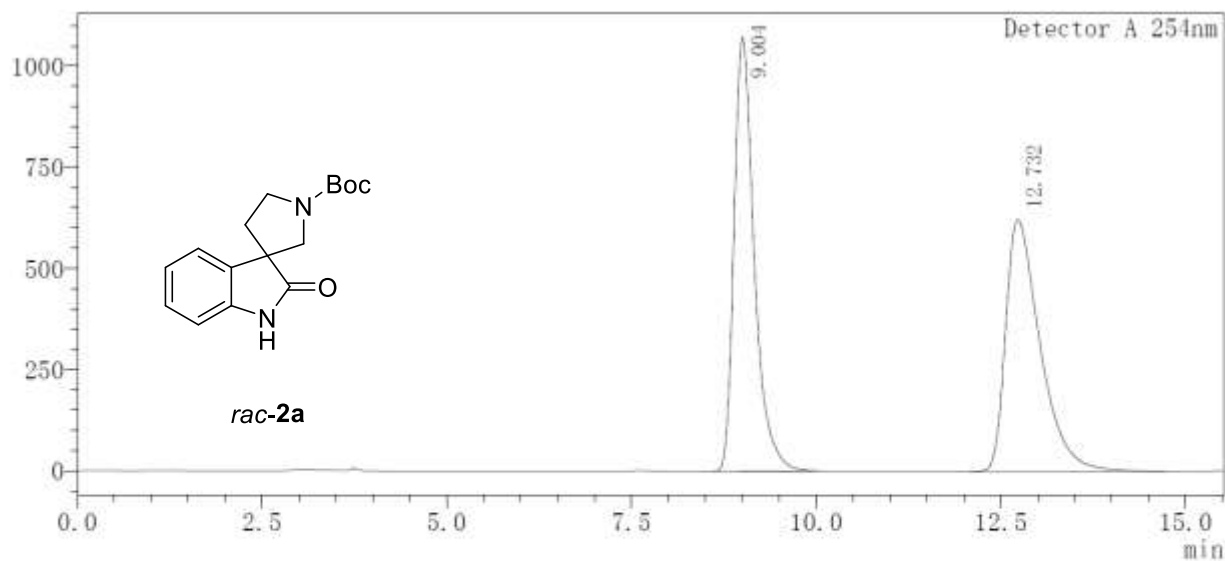

<Peak Table>

Detector A 254nm

| Peak  | RetTime | Area     | Height  | Area%  |
|-------|---------|----------|---------|--------|
| 1     | 9.004   | 20411978 | 1072021 | 50.315 |
| 2     | 12.732  | 20156246 | 621994  | 49.685 |
| Total |         | 40568224 | 1694015 |        |

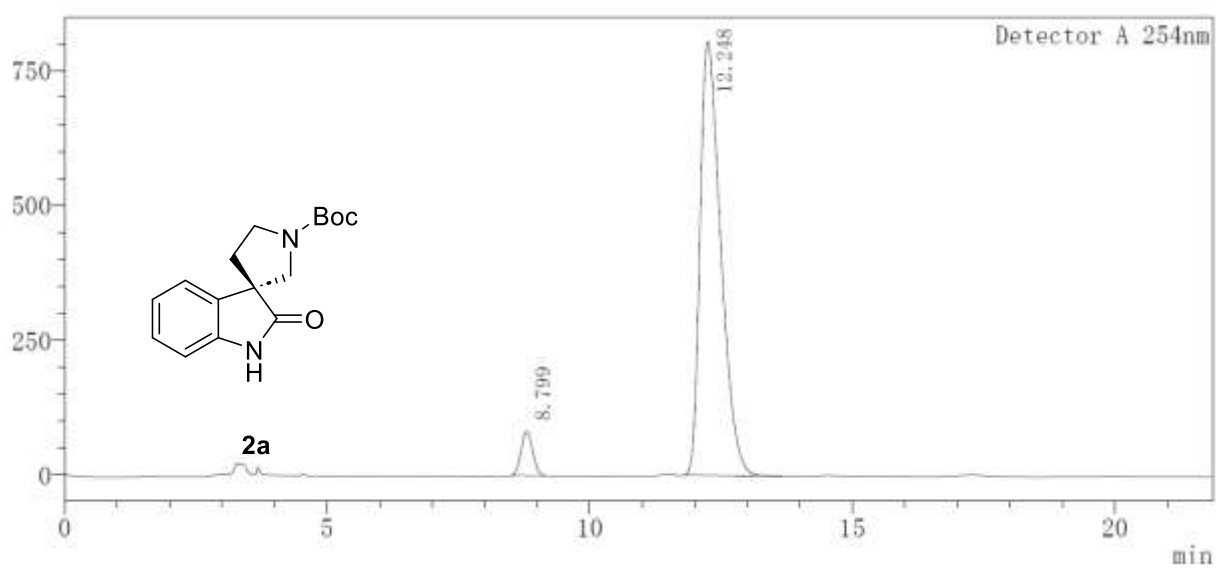

<Peak Table>

Detector A 254nm

| Peak  | RetTime | Area     | Height | Area%  |
|-------|---------|----------|--------|--------|
| 1     | 8.799   | 1253049  | 82099  | 5.374  |
| 2     | 12.248  | 22063723 | 805135 | 94.626 |
| Total |         | 23316772 | 887234 |        |

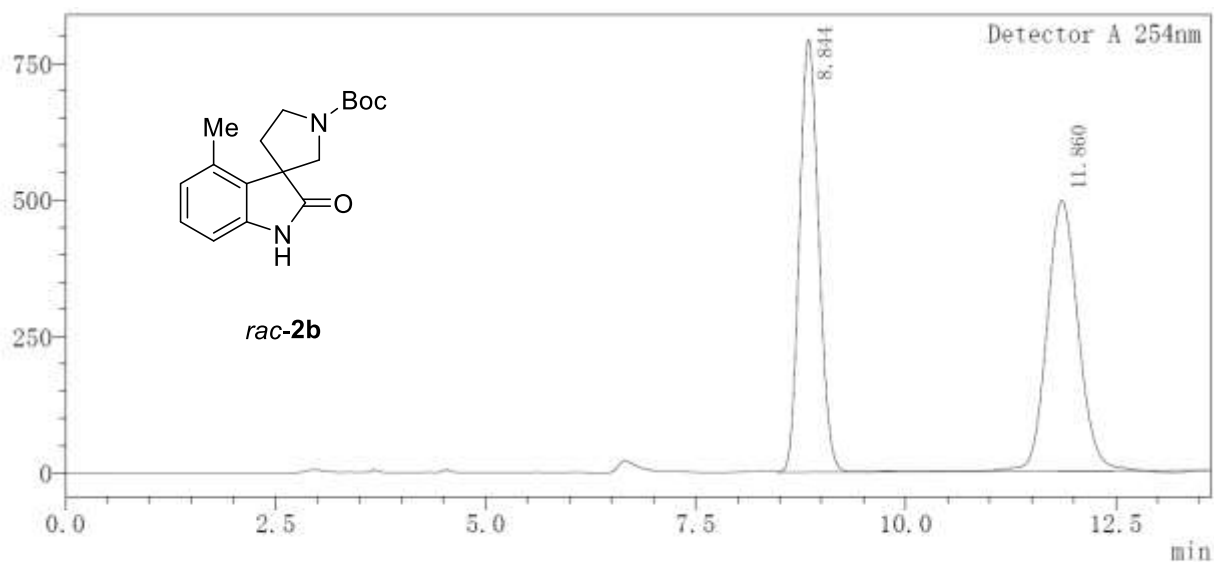

<Peak Table>

Detector A 254nm

| Peak  | RetTime | Area     | Height  | Area%  |
|-------|---------|----------|---------|--------|
| 1     | 8.844   | 12727383 | 793260  | 49.995 |
| 2     | 11.860  | 12729806 | 495963  | 50.005 |
| Total |         | 25457189 | 1289223 |        |

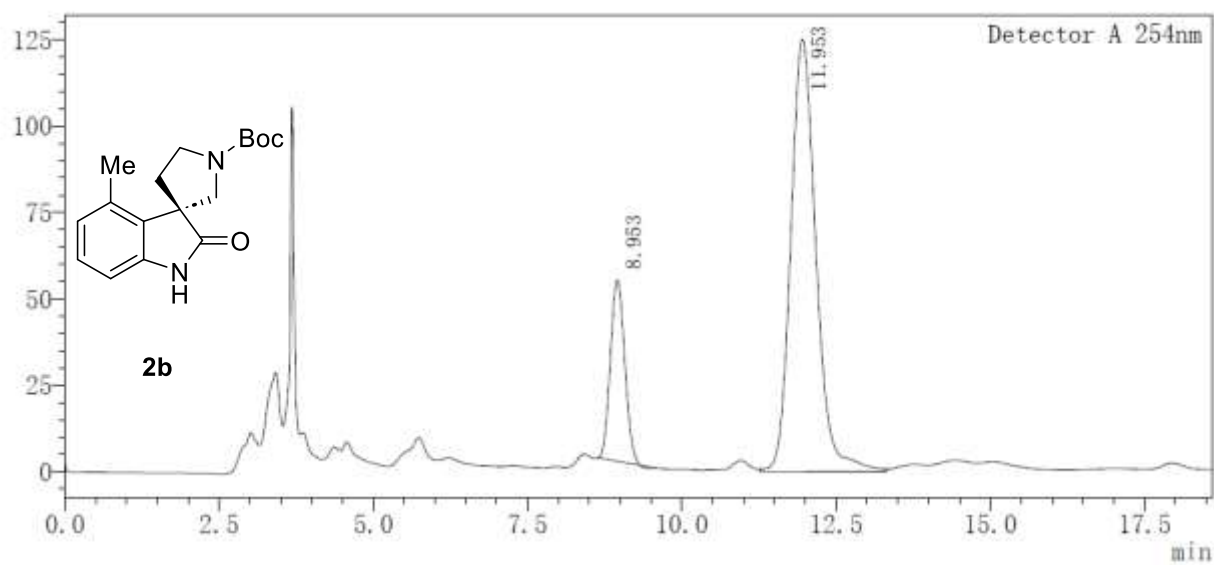

<Peak Table>

Detector A 254nm

| Peak  | RetTime | Area    | Height | Area%  |
|-------|---------|---------|--------|--------|
| 1     | 8.953   | 843272  | 52433  | 19.204 |
| 2     | 11.953  | 3547836 | 124922 | 80.796 |
| Total |         | 4391107 | 177355 |        |

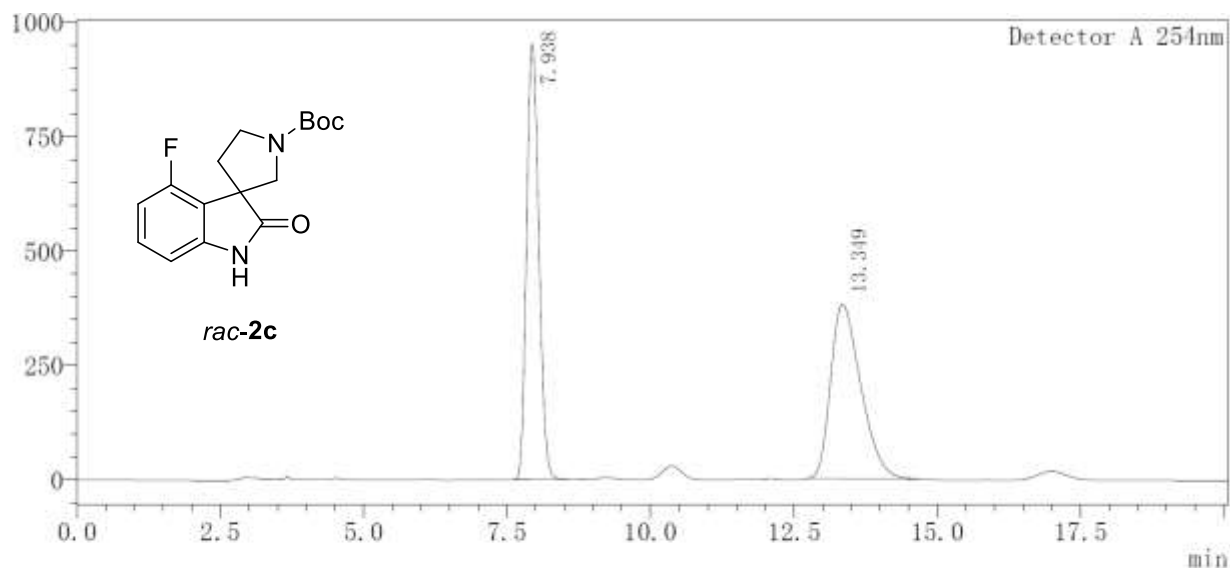

<Peak Table>

Detector A 254nm

| Peak  | RetTime | Area     | Height  | Area%  |  |  |  |
|-------|---------|----------|---------|--------|--|--|--|
| 1     | 7.938   | 14111989 | 950901  | 50.326 |  |  |  |
| 2     | 13.349  | 13929392 | 381566  | 49.674 |  |  |  |
| Total |         | 28041381 | 1332466 |        |  |  |  |

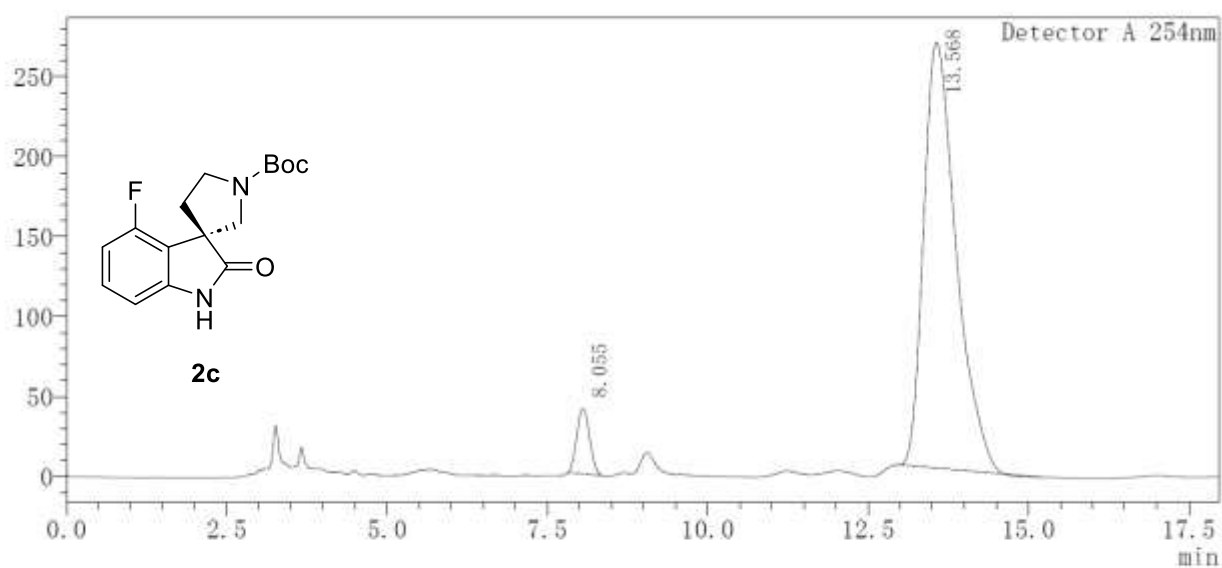

<Peak Table>

Detector A 254nm

| Peak  | RetTime | Area    | Height | Area%  |  |  |  |
|-------|---------|---------|--------|--------|--|--|--|
| 1     | 8.055   | 566588  | 40926  | 5.690  |  |  |  |
| 2     | 13.568  | 9390946 | 266248 | 94.310 |  |  |  |
| Total |         | 9957534 | 307174 |        |  |  |  |

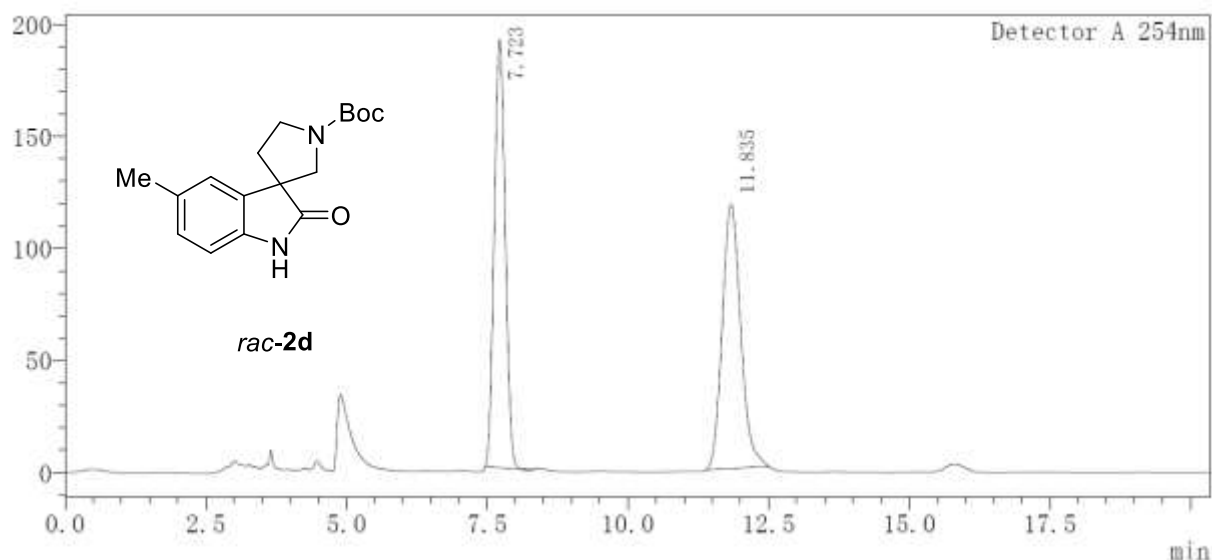

<Peak Table>

Detector A 254nm

| Peak  | RetTime | Area    | Height | Area%  |  |  |  |
|-------|---------|---------|--------|--------|--|--|--|
| 1     | 7.723   | 2595549 | 190942 | 49.155 |  |  |  |
| 2     | 11.835  | 2684769 | 117777 | 50.845 |  |  |  |
| Total |         | 5280318 | 308719 |        |  |  |  |

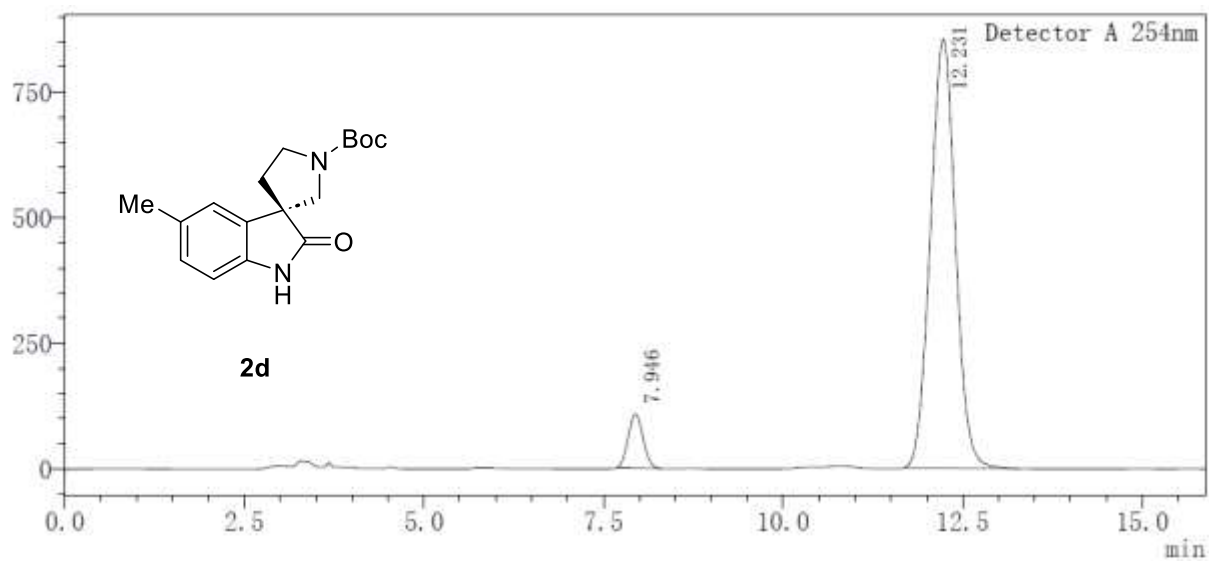

<Peak Table>

Detector A 254nm

| Peak  | RetTime | Area     | Area   | Area%  |  |  |  |
|-------|---------|----------|--------|--------|--|--|--|
| 1     | 7.946   | 1540455  | 106785 | 6.915  |  |  |  |
| 2     | 12.231  | 20735028 | 854051 | 93.085 |  |  |  |
| Total |         | 22275483 | 960836 |        |  |  |  |

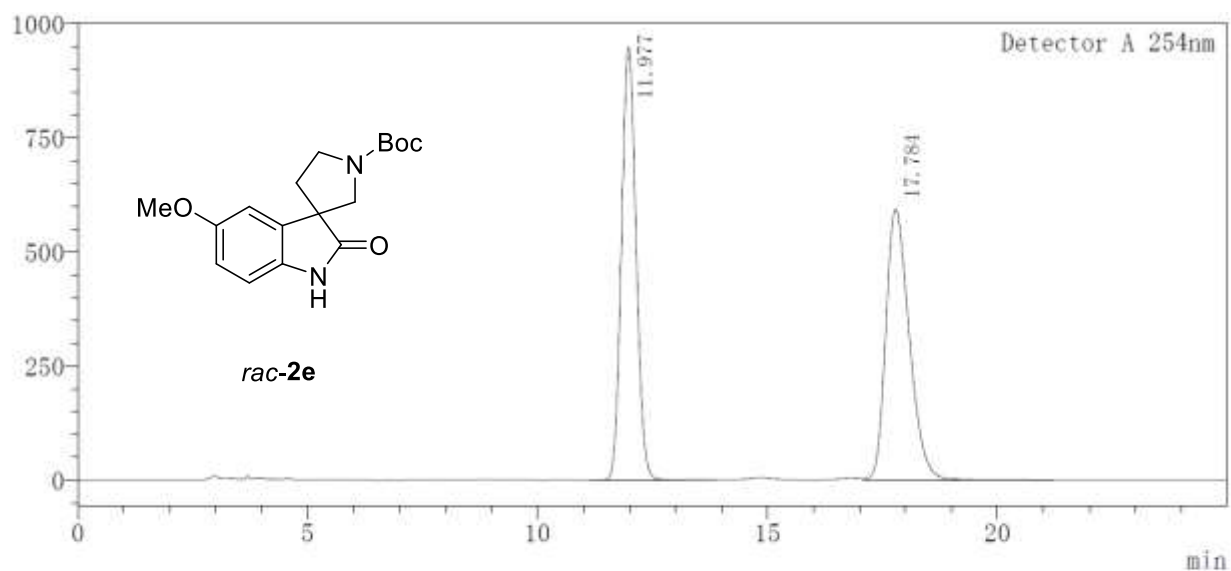

<Peak Table>

Detector A 254nm

| Peak  | RetTime | Area     | Height  | Area%  |  |  |  |
|-------|---------|----------|---------|--------|--|--|--|
| 1     | 11.977  | 20942931 | 948641  | 49.860 |  |  |  |
| 2     | 17.784  | 21060146 | 593319  | 50.140 |  |  |  |
| Total |         | 42003077 | 1541960 |        |  |  |  |

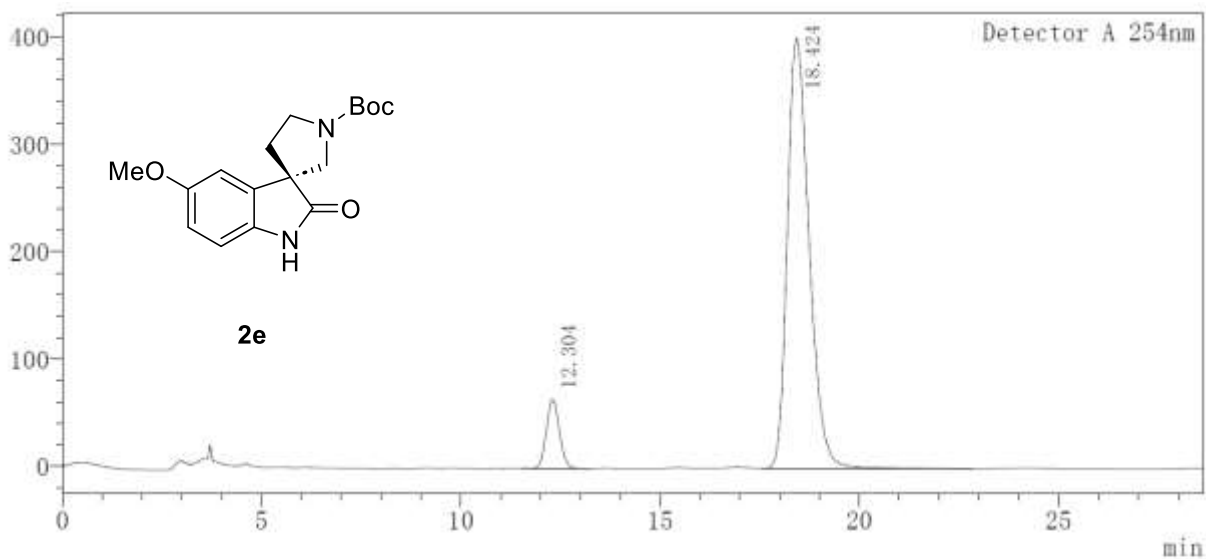

<Peak Table>

Detector A 254nm

| Peak  | RetTime | Area     | Height | Area%  |  |  |  |
|-------|---------|----------|--------|--------|--|--|--|
| 1     | 12.304  | 1483920  | 64368  | 8.816  |  |  |  |
| 2     | 18.424  | 15349008 | 401544 | 91.184 |  |  |  |
| Total |         | 16832928 | 465912 |        |  |  |  |

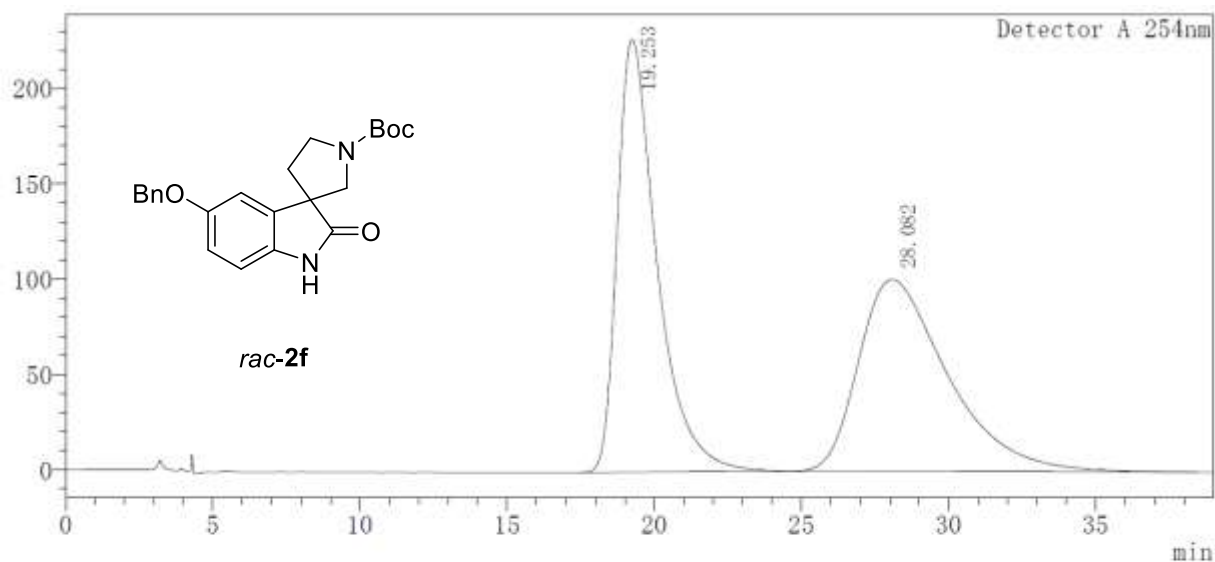

<Peak Table>

Detector A 254nm

| Peak  | RetTime | Area     | Height | Area%  |
|-------|---------|----------|--------|--------|
| 1     | 19.253  | 21327774 | 227211 | 50.088 |
| 2     | 28.082  | 21252896 | 100731 | 49.912 |
| Total |         | 42580670 | 327942 |        |

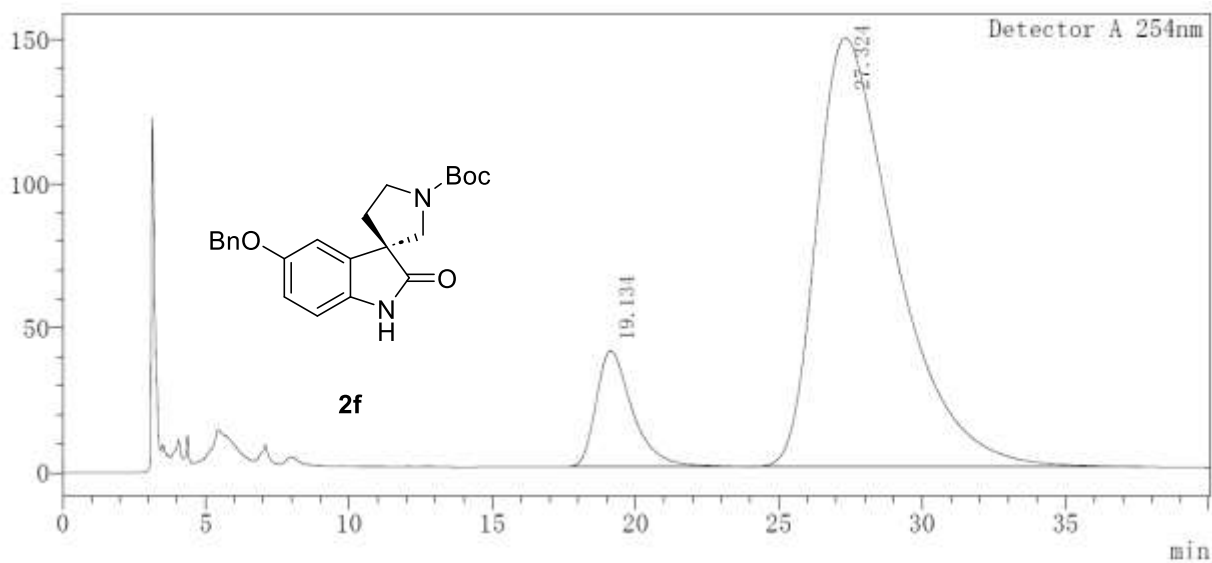

<Peak Table>

Detector A 254nm

| Peak  | RetTime | Area     | Height | Area%  |
|-------|---------|----------|--------|--------|
| 1     | 19.134  | 3532845  | 40120  | 11.009 |
| 2     | 27.324  | 28558464 | 148491 | 88.991 |
| Total |         | 32091310 | 188611 |        |

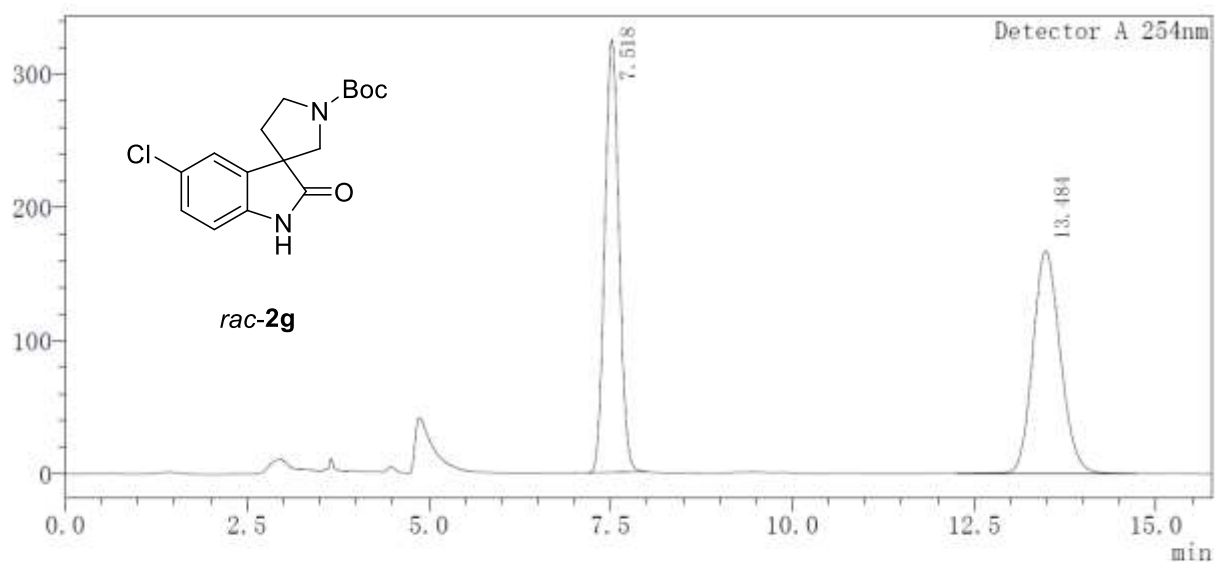

<Peak Table>

Detector A 254nm

| Peak  | RetTime | Area    | Height | Area%  |
|-------|---------|---------|--------|--------|
| 1     | 7.518   | 4431375 | 324567 | 50.024 |
| 2     | 13.484  | 4427184 | 167394 | 49.976 |
| Total |         | 8858558 | 491962 |        |

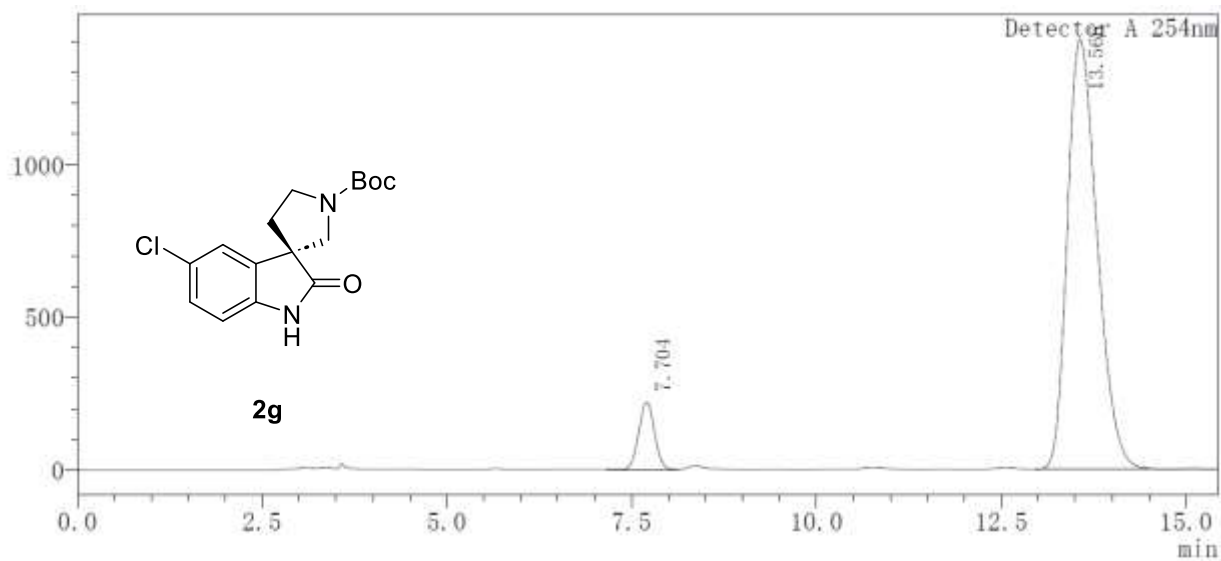

<Peak Table>

Detector A 254nm

| Peak  | RetTime | Area     | Height  | Area%  |
|-------|---------|----------|---------|--------|
| 1     | 7.704   | 3299672  | 219949  | 7.677  |
| 2     | 13.566  | 39682509 | 1409888 | 92.323 |
| Total |         | 42982182 | 1629837 |        |

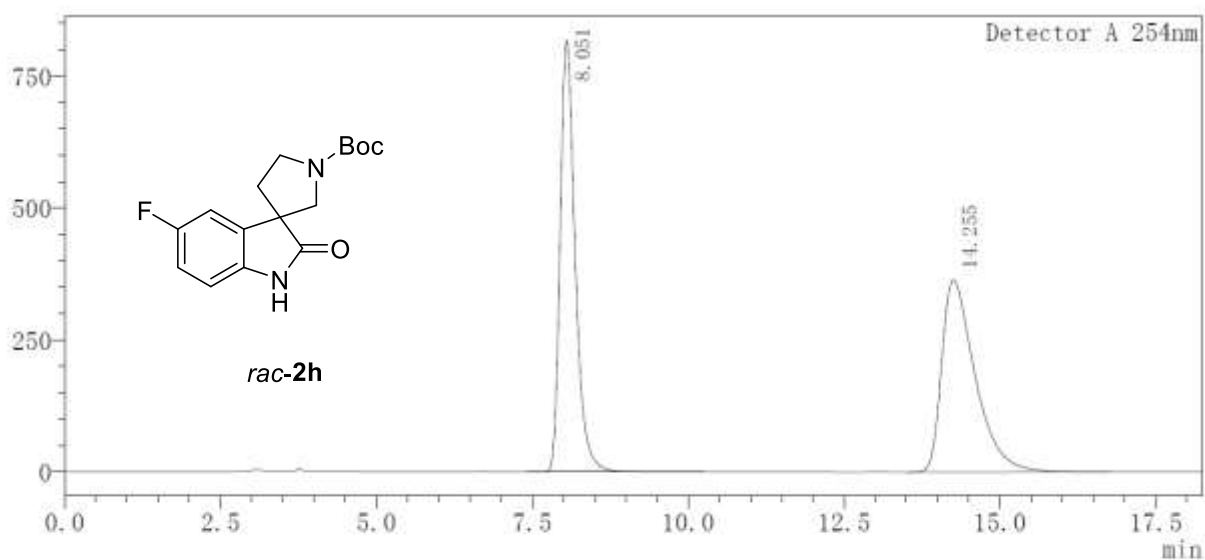

<Peak Table>

Detector A 254nm

| Peak  | RetTime | Area     | Height  | Area%  |  |  |  |
|-------|---------|----------|---------|--------|--|--|--|
| 1     | 8.051   | 13703006 | 816734  | 50.260 |  |  |  |
| 2     | 14.255  | 13561087 | 364282  | 49.740 |  |  |  |
| Total |         | 27264093 | 1181016 |        |  |  |  |

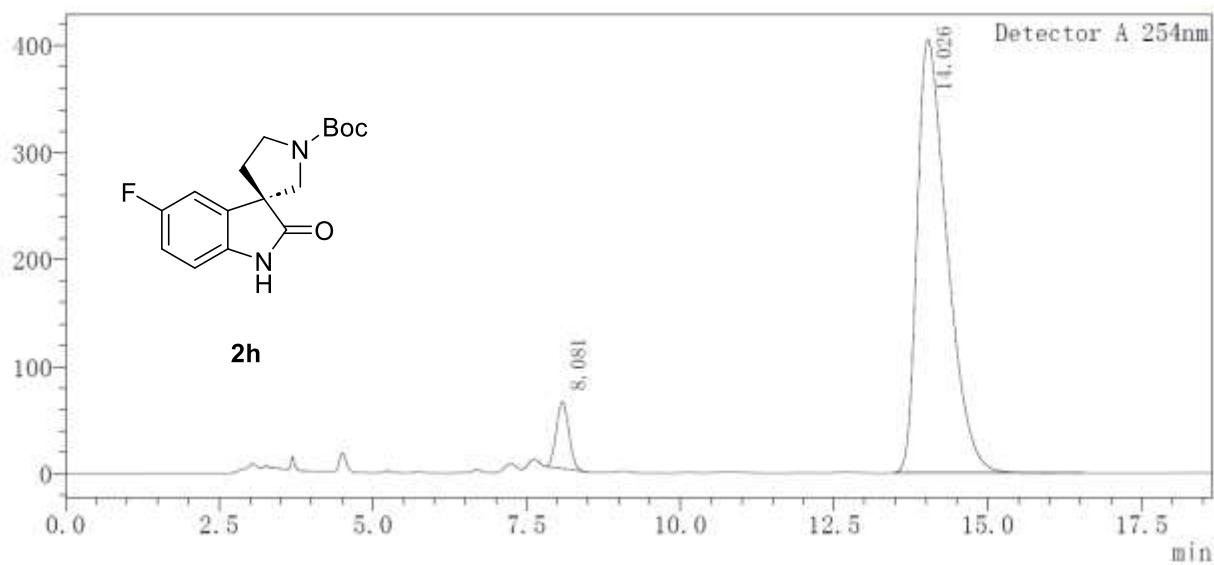

<Peak Table>

Detector A 254nm

| Peak  | RetTime | Area     | Height | Area%  |  |  |  |
|-------|---------|----------|--------|--------|--|--|--|
| 1     | 8.081   | 885917   | 62366  | 6.054  |  |  |  |
| 2     | 14.026  | 13747623 | 405031 | 93.946 |  |  |  |
| Total |         | 14633539 | 467397 |        |  |  |  |

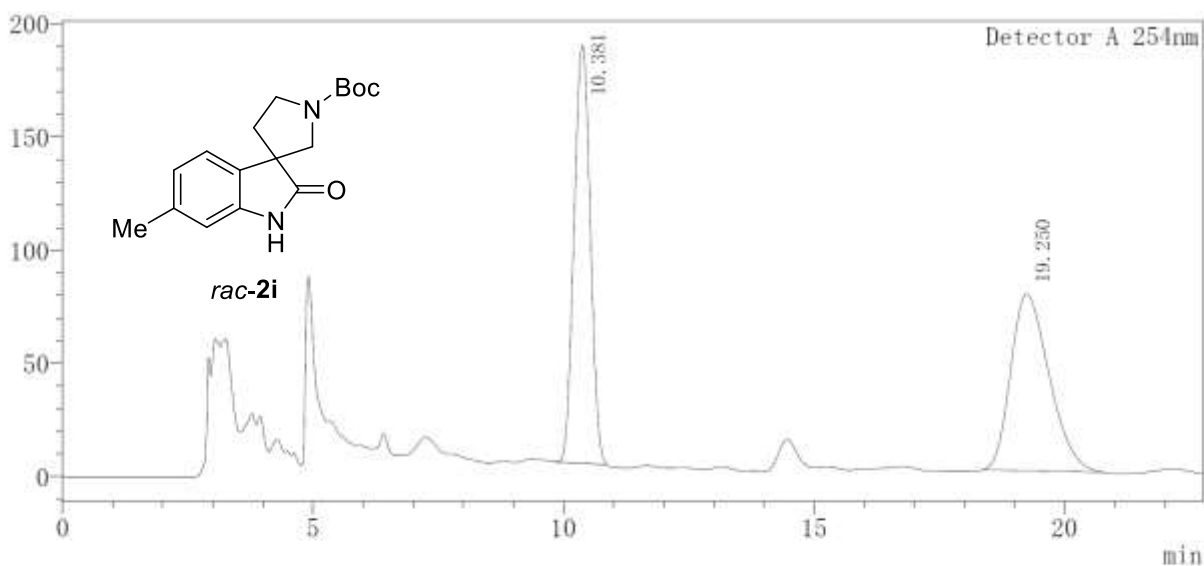

<Peak Table>

Detector A 254nm

| Peak  | RetTime | Area    | Height | Area%  |
|-------|---------|---------|--------|--------|
| 1     | 10.381  | 4015975 | 181874 | 49.092 |
| 2     | 19.250  | 4164456 | 77831  | 50.908 |
| Total |         | 8180431 | 259706 |        |

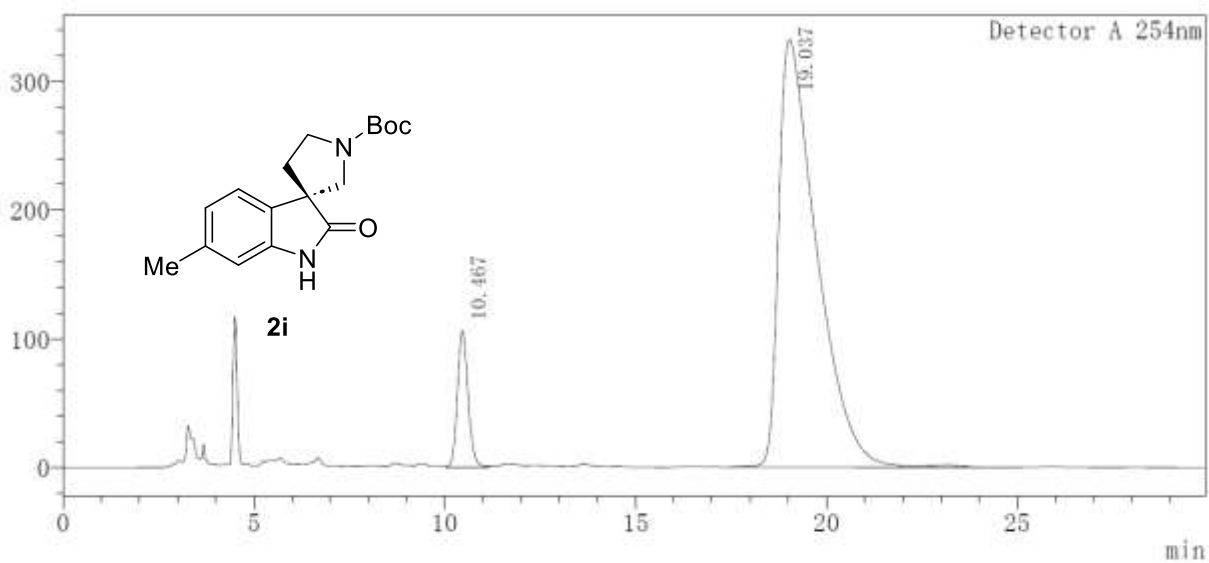

<Peak Table>

Detector A 254nm

| Peak  | RetTime | Area     | Height | Area%  |
|-------|---------|----------|--------|--------|
| 1     | 10.467  | 2053899  | 106244 | 8.209  |
| 2     | 19.037  | 22966388 | 331992 | 91.791 |
| Total |         | 25020287 | 438236 |        |

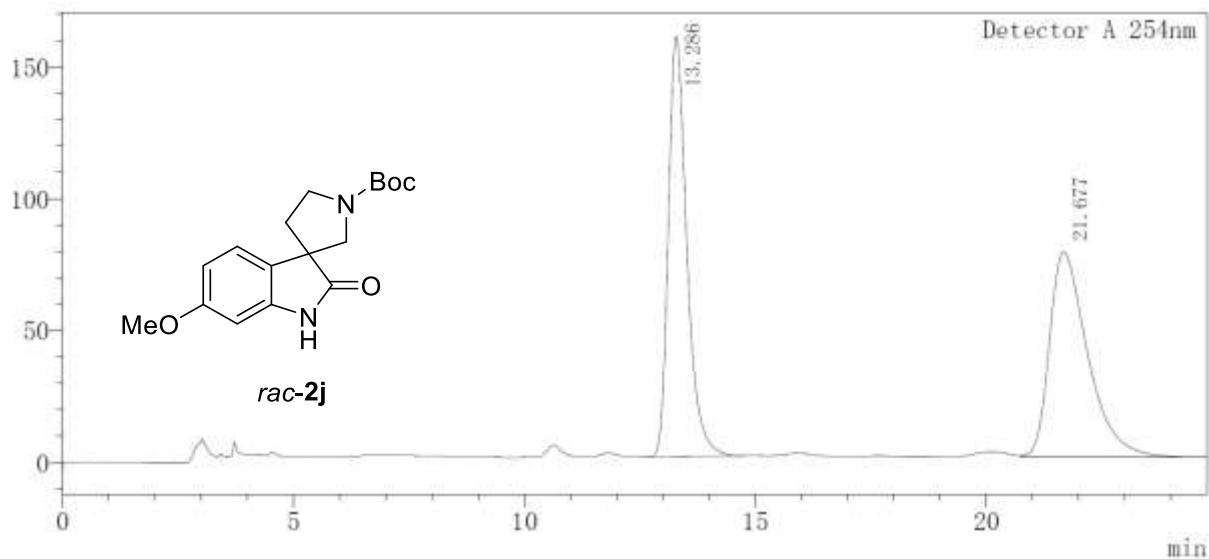

<Peak Table>

Detector A 254nm

| Peak  | RetTime | Area    | Height | Area%  |
|-------|---------|---------|--------|--------|
| 1     | 13.286  | 4427975 | 159413 | 49.594 |
| 2     | 21.677  | 4500505 | 78029  | 50.406 |
| Total |         | 8928480 | 237442 |        |

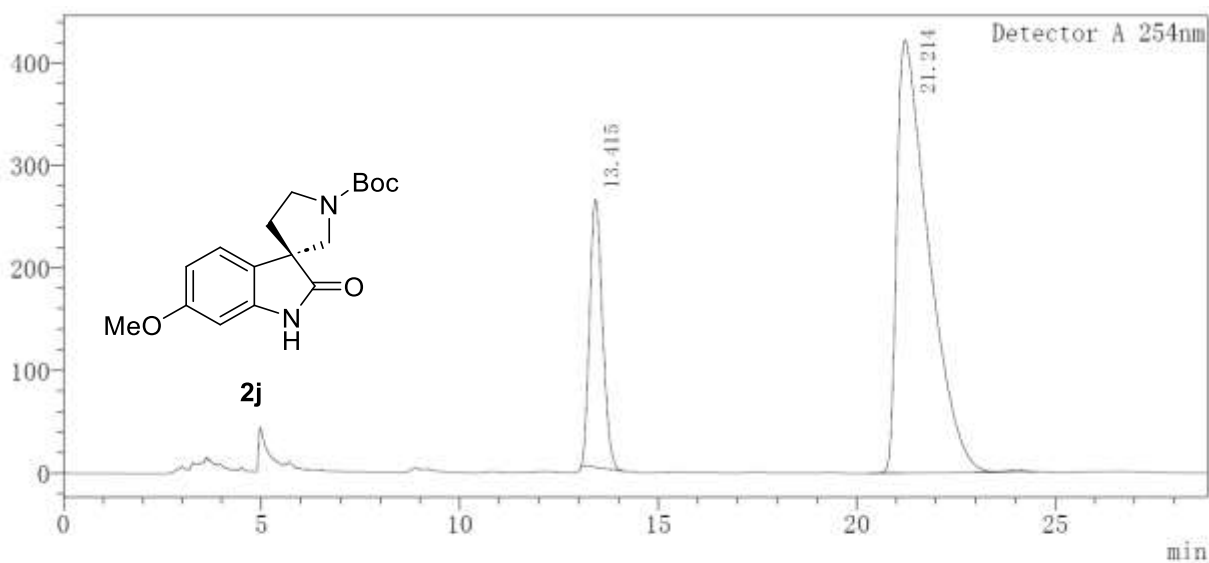

<Peak Table>

Detector A 254nm

| Peak  | RetTime | Area     | Height | Area%  |
|-------|---------|----------|--------|--------|
| 1     | 13.415  | 5875472  | 261088 | 19.985 |
| 2     | 21.214  | 23524298 | 422048 | 80.015 |
| Total |         | 29399770 | 683136 |        |

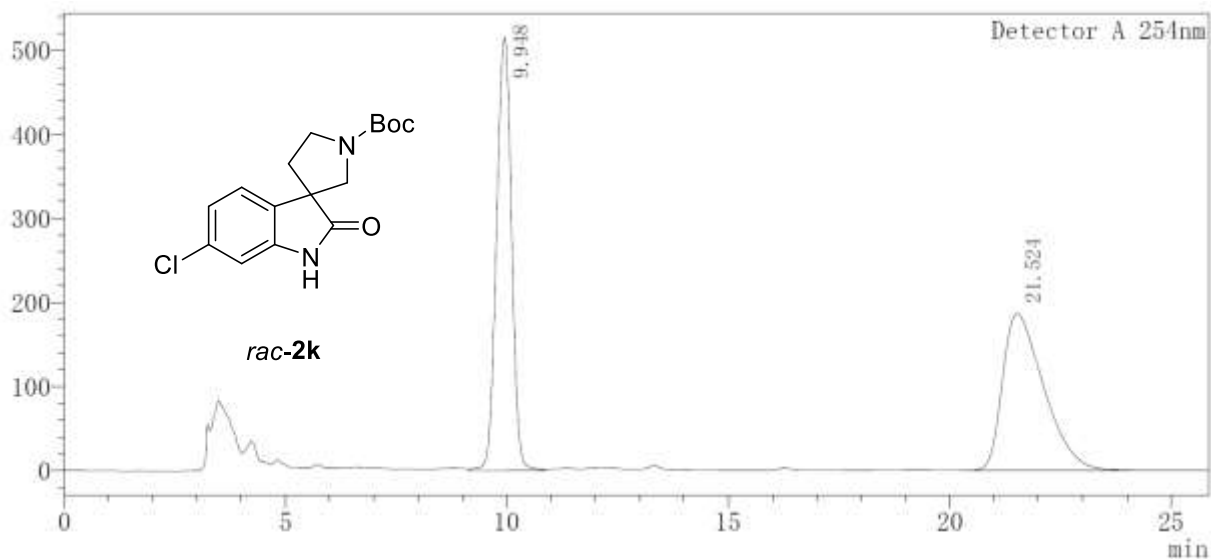

<Peak Table>

Detector A 254nm

| Peak  | RetTime | Area     | Height | Area%  |
|-------|---------|----------|--------|--------|
| 1     | 9.948   | 12209329 | 515595 | 50.167 |
| 2     | 21.524  | 12127968 | 186824 | 49.833 |
| Total |         | 24337297 | 702420 |        |

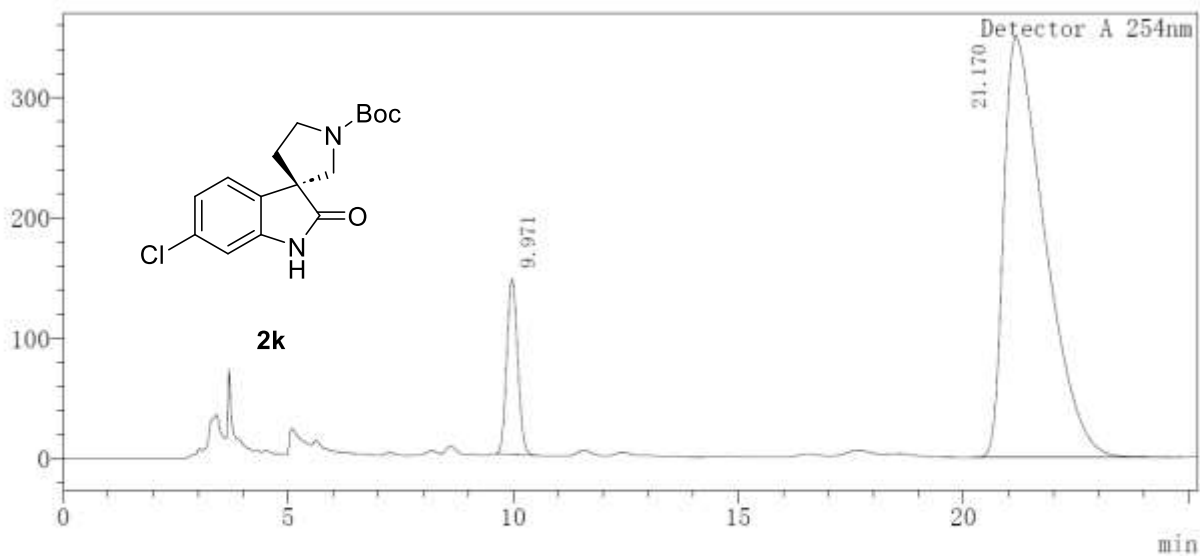

<Peak Table>

Detector A 254nm

| Peak  | RetTime | Area     | Height | Area%  |
|-------|---------|----------|--------|--------|
| 1     | 9.971   | 2466042  | 145637 | 9.999  |
| 2     | 21.170  | 22197522 | 349211 | 90.001 |
| Total |         | 24663564 | 494847 |        |

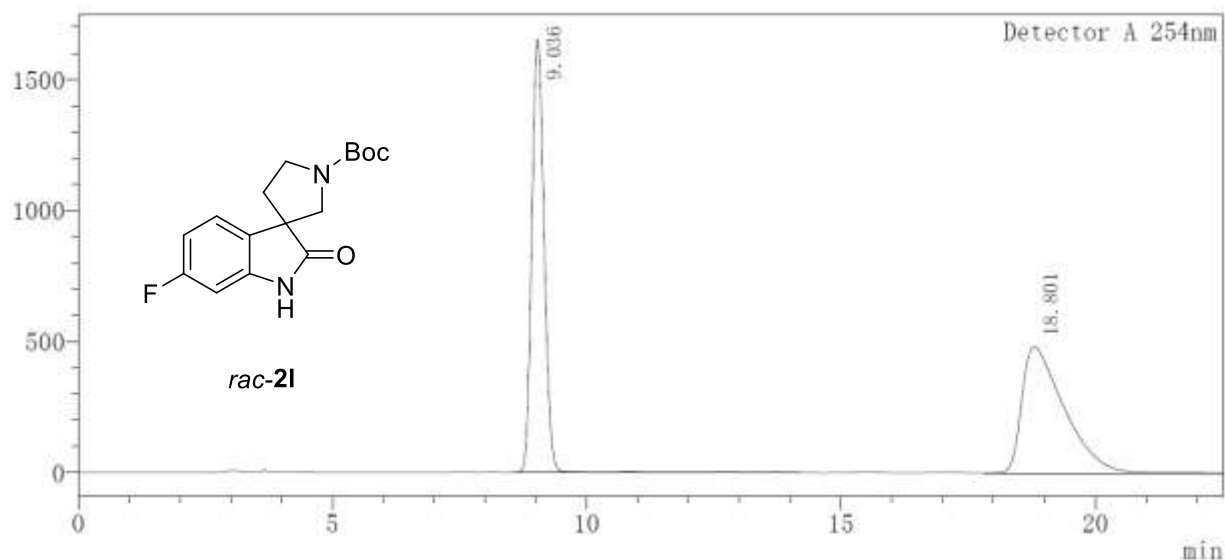

<Peak Table>

Detector A 254nm

| Peak  | RetTime | Area     | Height  | Area%  |  |  |  |
|-------|---------|----------|---------|--------|--|--|--|
| 1     | 9.036   | 28086687 | 1654251 | 50.501 |  |  |  |
| 2     | 18.801  | 27529883 | 479876  | 49.499 |  |  |  |
| Total |         | 55616570 | 2134127 |        |  |  |  |

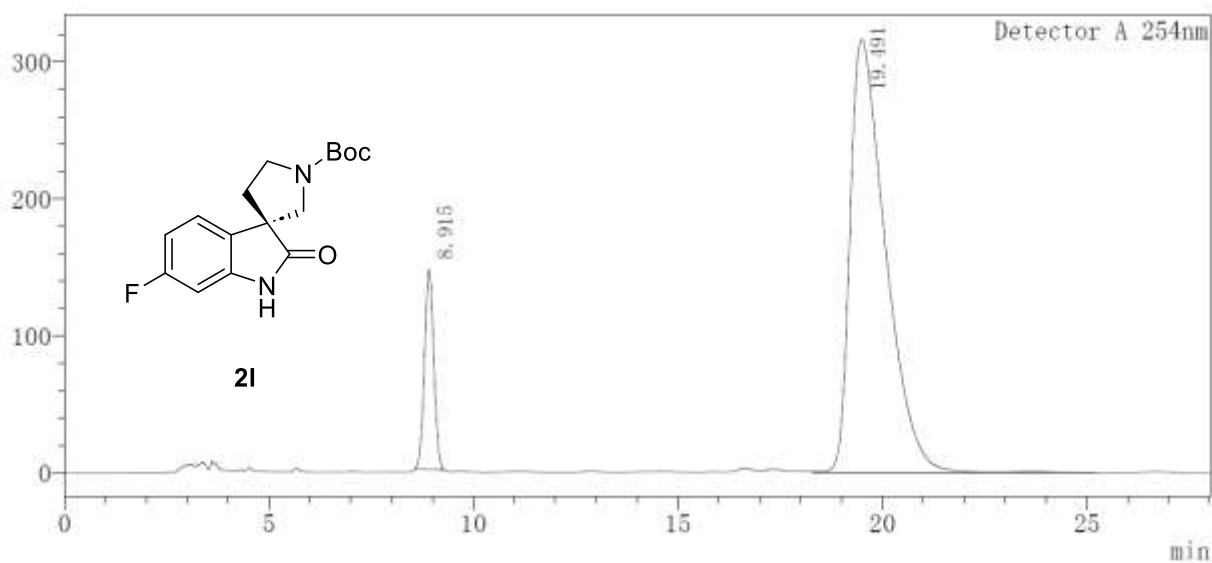

<Peak Table>

Detector A 254nm

| Peak  | RetTime | Area     | Height | Area%  |  |  |  |
|-------|---------|----------|--------|--------|--|--|--|
| 1     | 8.915   | 2316918  | 145684 | 10.791 |  |  |  |
| 2     | 19.491  | 19154571 | 316667 | 89.209 |  |  |  |
| Total |         | 21471489 | 462351 |        |  |  |  |

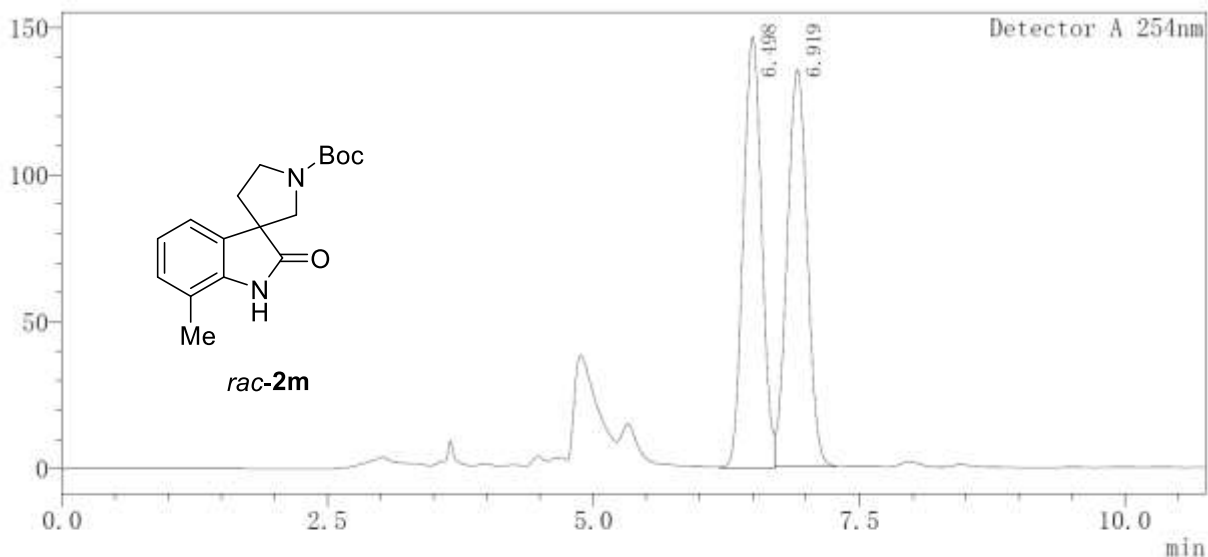

<Peak Table>

Detector A 254nm

| Peak  | RetTime | Area    | Height | Area%  |
|-------|---------|---------|--------|--------|
| 1     | 6.498   | 1769138 | 146932 | 49.950 |
| 2     | 6.919   | 1772704 | 135082 | 50.050 |
| Total |         | 3541842 | 282014 |        |

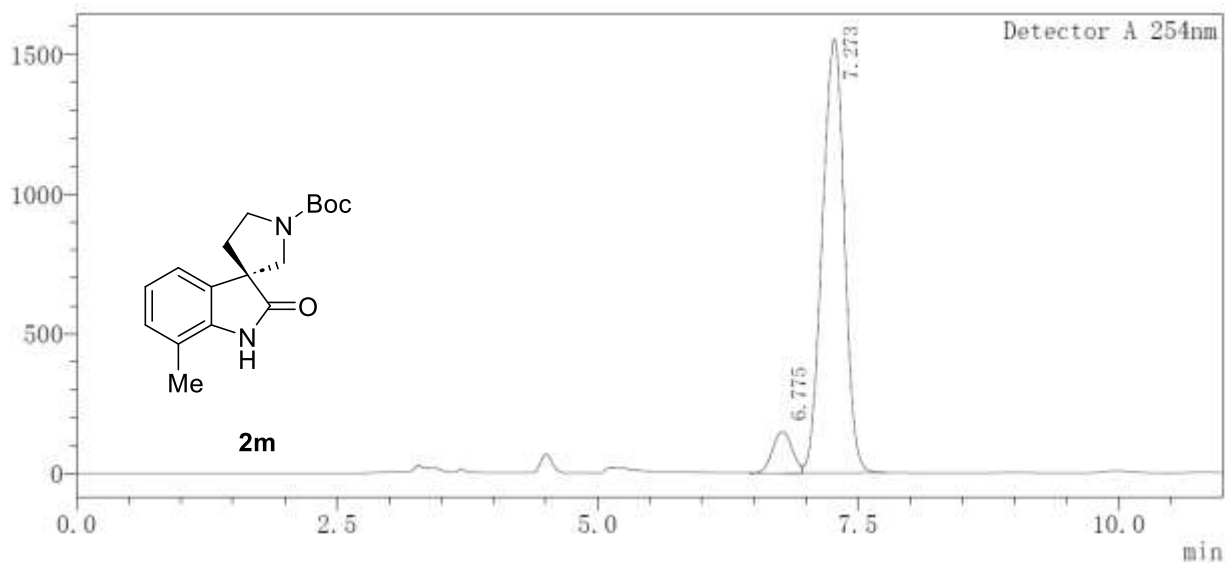

<Peak Table>

Detector A 254nm

| Peak  | RetTime | Area     | Height  | Area%  |
|-------|---------|----------|---------|--------|
| 1     | 6.775   | 1981836  | 149620  | 7.946  |
| 2     | 7.273   | 22959517 | 1553784 | 92.054 |
| Total |         | 24941353 | 1703404 |        |

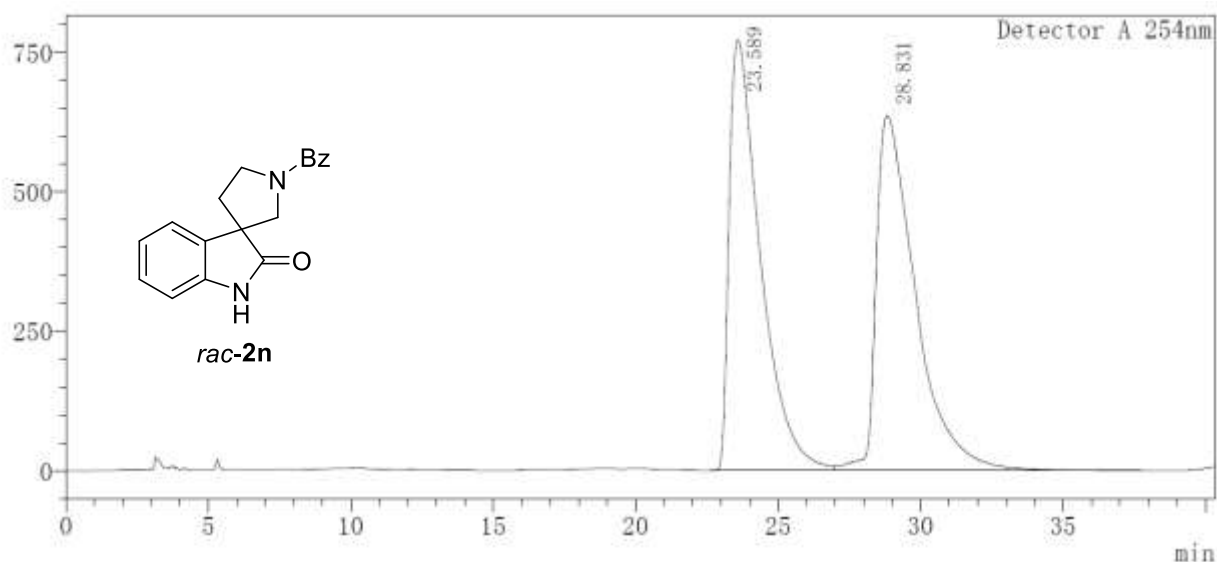

<Peak Table>

Detector A 254nm

| Peak  | RetTime | Area      | Height  | Area%  |  |  |  |
|-------|---------|-----------|---------|--------|--|--|--|
| 1     | 23.589  | 58921304  | 771817  | 49.042 |  |  |  |
| 2     | 28.831  | 61222259  | 635952  | 50.958 |  |  |  |
| Total |         | 120143563 | 1407769 |        |  |  |  |

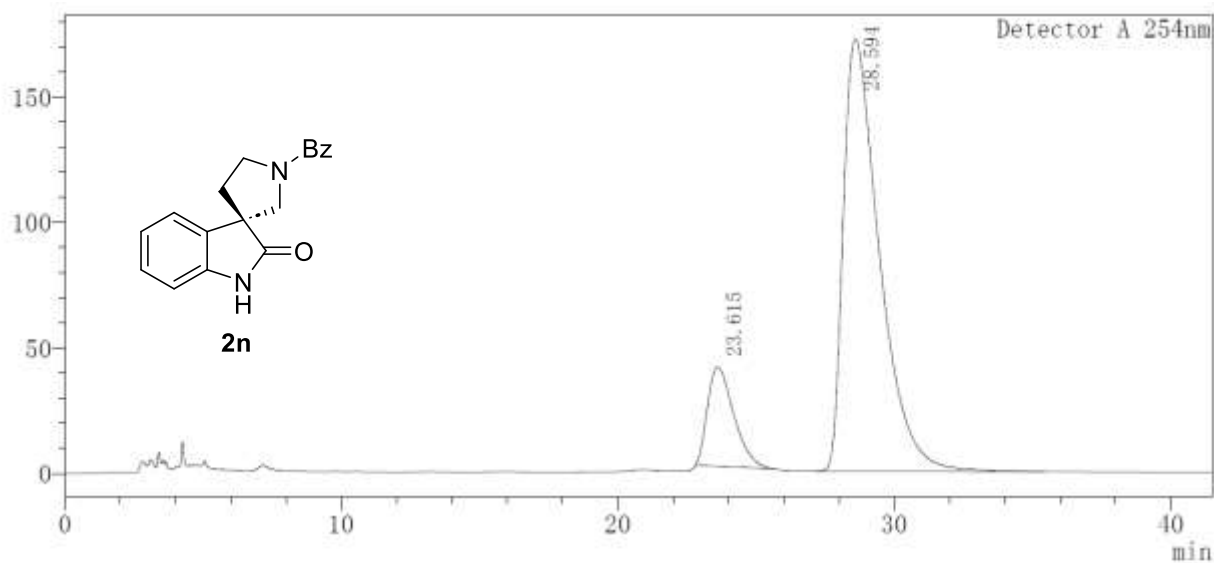

<Peak Table>

Detector A 254nm

| Peak  | RetTime | Area     | Height | Area%  |  |  |  |
|-------|---------|----------|--------|--------|--|--|--|
| 1     | 23.615  | 2611405  | 39473  | 14.296 |  |  |  |
| 2     | 28.594  | 15655421 | 172184 | 85.704 |  |  |  |
| Total |         | 18266826 | 211657 |        |  |  |  |

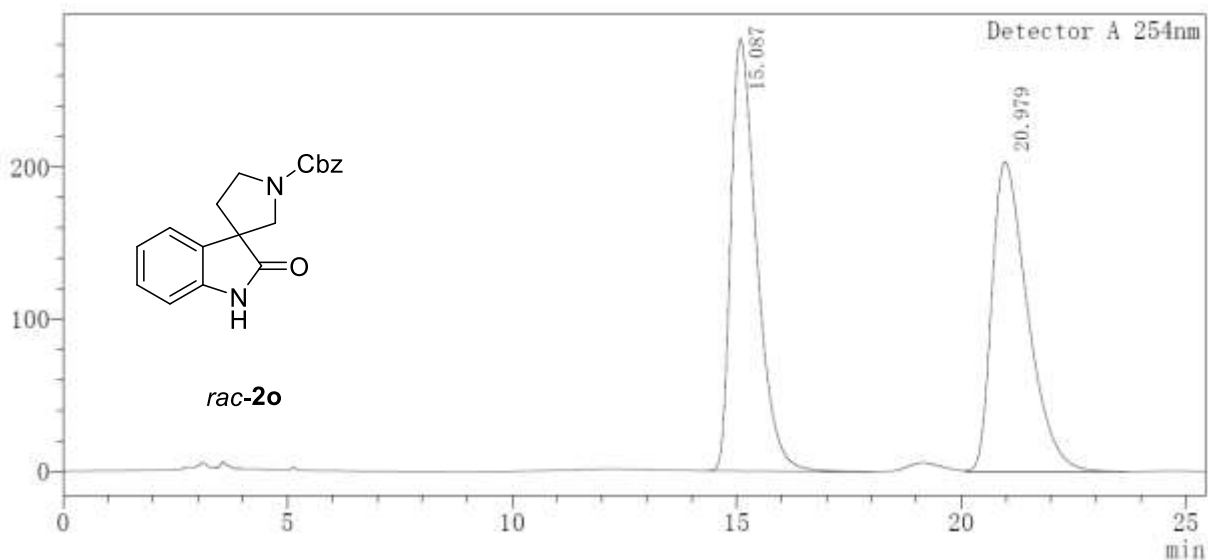

<Peak Table>

Detector A 254nm

| Peak  | RetTime | Area     | Height | Area%  |  |  |  |
|-------|---------|----------|--------|--------|--|--|--|
| 1     | 15.087  | 11349076 | 283672 | 50.179 |  |  |  |
| 2     | 20.979  | 11268052 | 203272 | 49.821 |  |  |  |
| Total |         | 22617128 | 486944 |        |  |  |  |

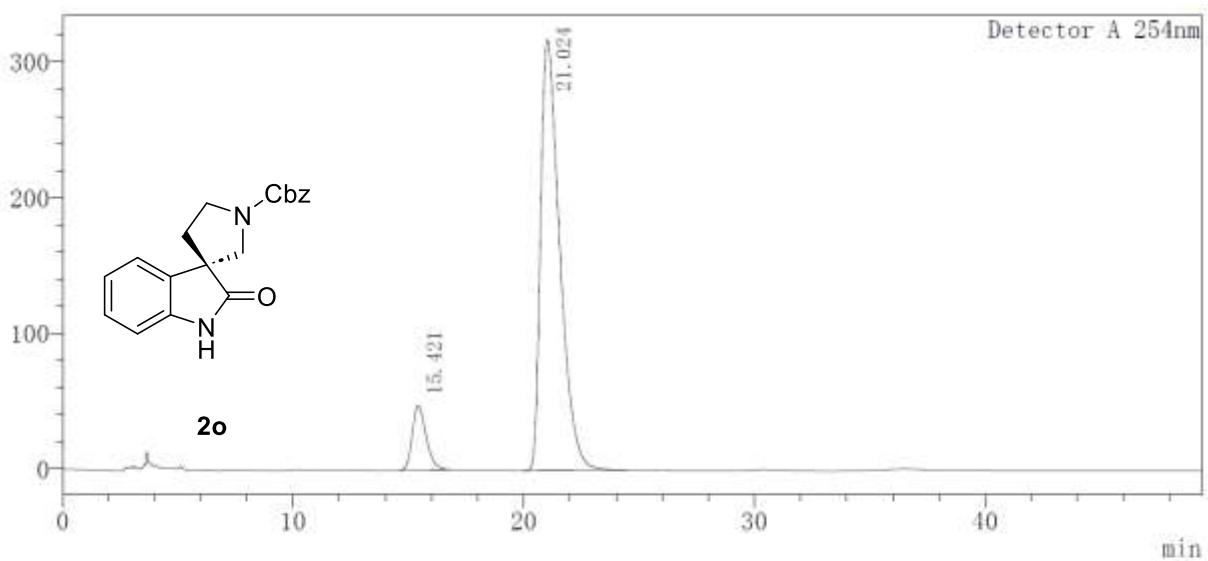

<Peak Table>

Detector A 254nm

| Peak  | RetTime | Area     | Height | Area%  |  |  |  |
|-------|---------|----------|--------|--------|--|--|--|
| 1     | 15.421  | 1964967  | 47483  | 9.686  |  |  |  |
| 2     | 21.024  | 18321184 | 317359 | 90.314 |  |  |  |
| Total |         | 20286151 | 364842 |        |  |  |  |

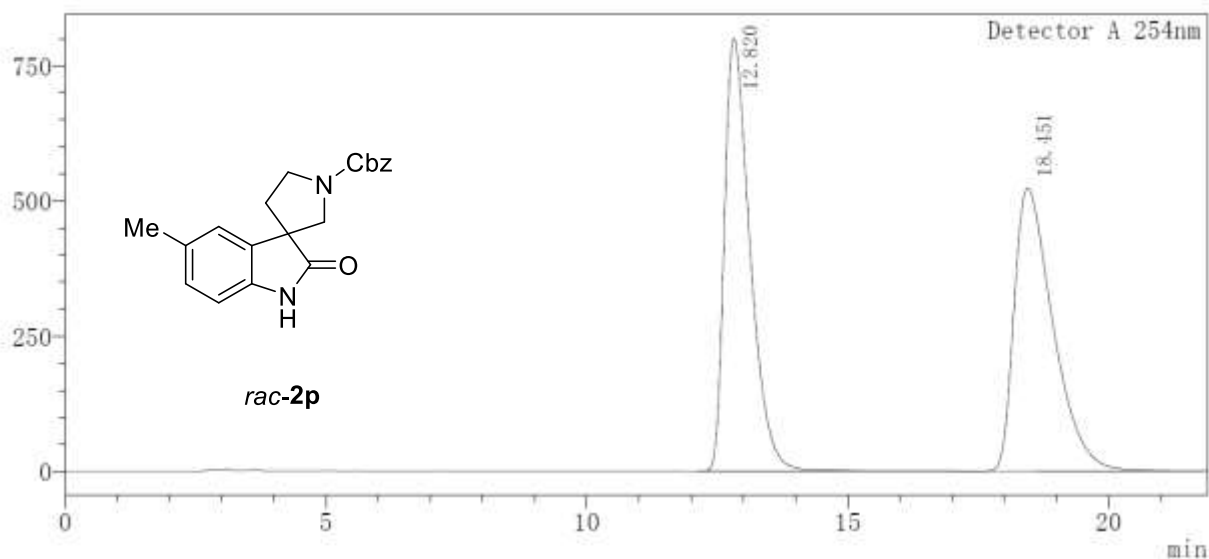

<Peak Table>

Detector A 254nm

| Peak  | RetTime | Area     | Height  | Area%  |
|-------|---------|----------|---------|--------|
| 1     | 12.820  | 27445816 | 799769  | 50.264 |
| 2     | 18.451  | 27158037 | 523334  | 49.736 |
| Total |         | 54603853 | 1323103 |        |

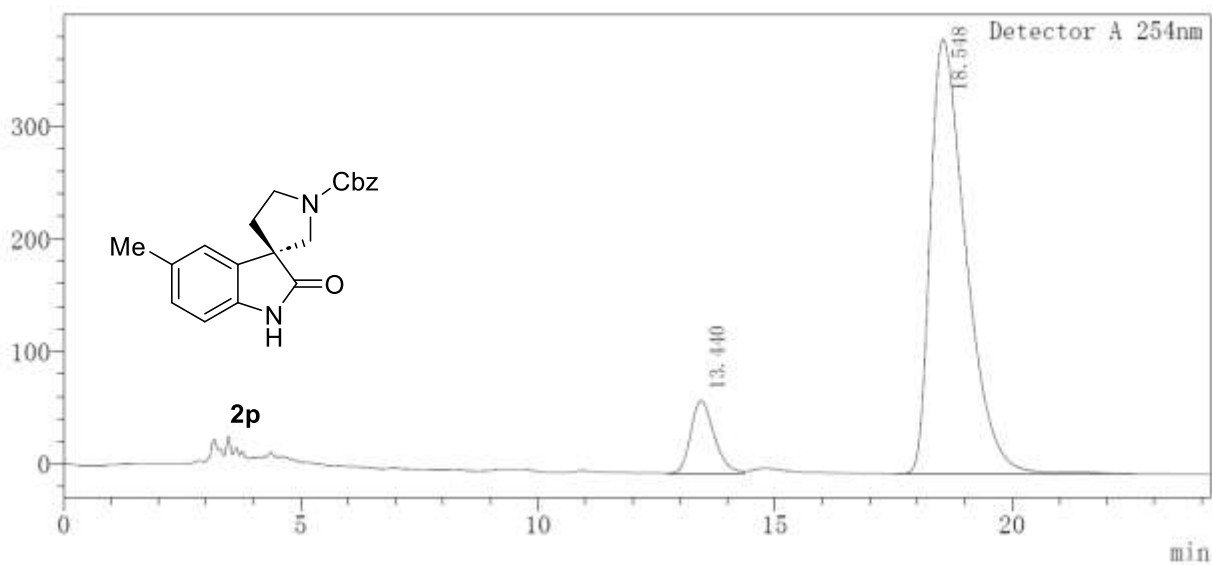

<Peak Table>

Detector A 254nm

| Peak  | RetTime | Area     | Height | Area%  |
|-------|---------|----------|--------|--------|
| 1     | 13.440  | 2210102  | 64604  | 9.853  |
| 2     | 18.548  | 20220688 | 386387 | 90.147 |
| Total |         | 22430790 | 450992 |        |

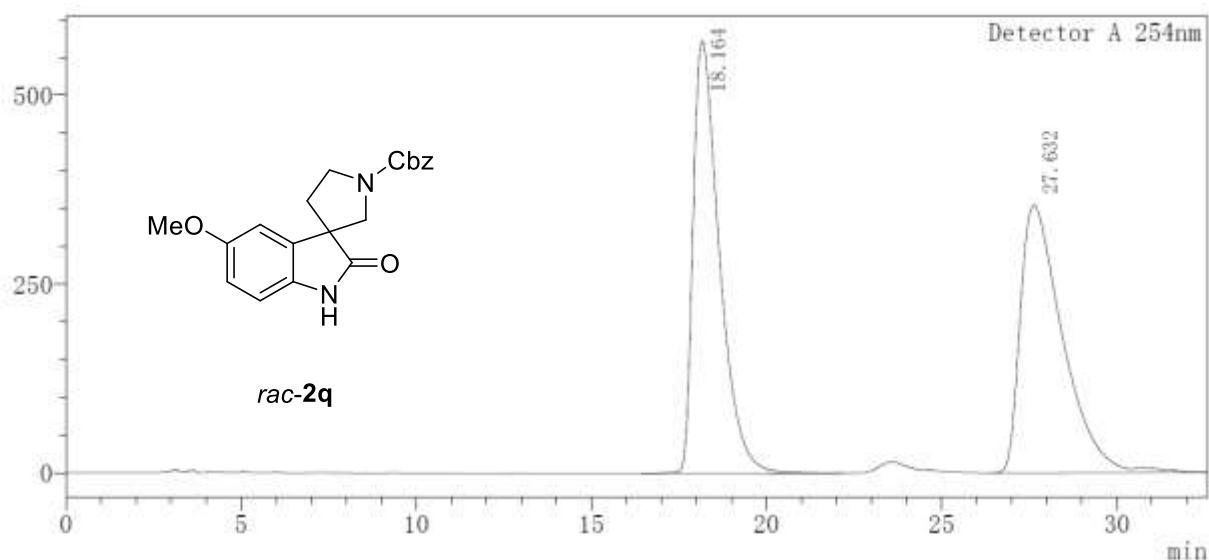

<Peak Table>

Detector A 254nm

| Peak  | RetTime | Area     | Height | Area%  |
|-------|---------|----------|--------|--------|
| 1     | 18.164  | 29966465 | 573000 | 50.060 |
| 2     | 27.632  | 29894969 | 354577 | 49.940 |
| Total |         | 59861434 | 927577 |        |

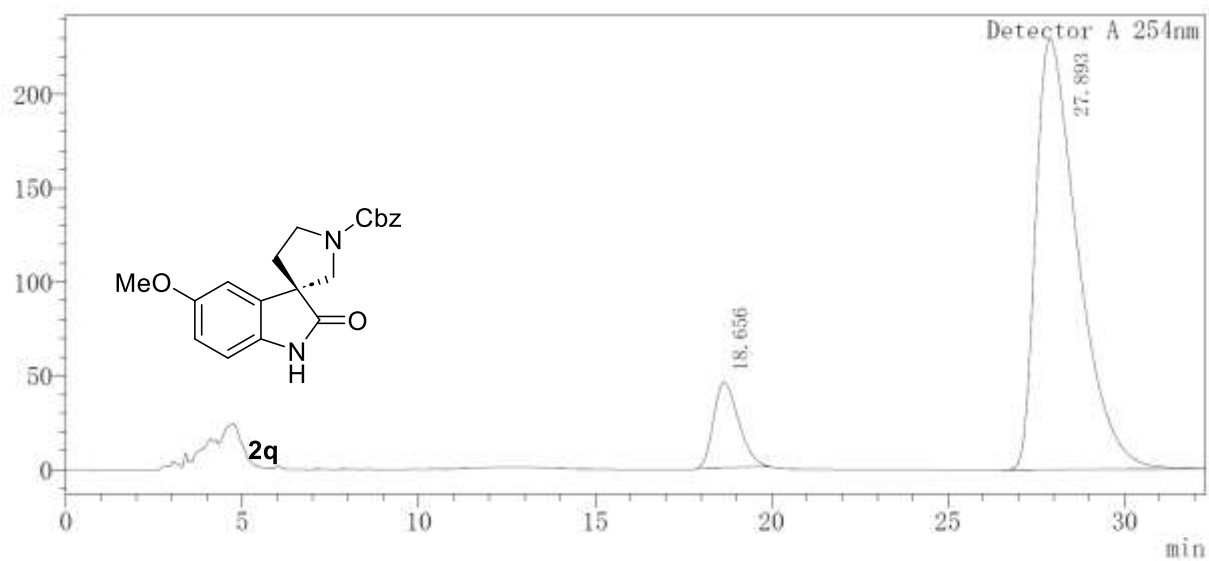

<Peak Table>

Detector A 254nm

| Peak  | RetTime | Area     | Height | Area%  |
|-------|---------|----------|--------|--------|
| 1     | 18.656  | 2235573  | 45268  | 10.554 |
| 2     | 27.893  | 18947141 | 229351 | 89.446 |
| Total |         | 21182714 | 274618 |        |

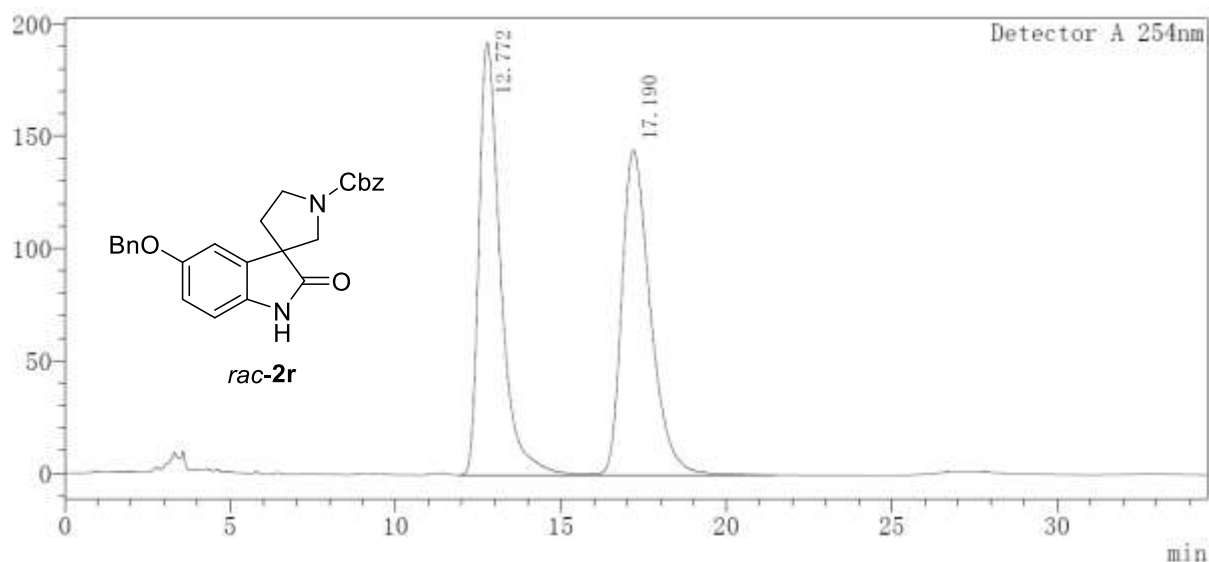

<Peak Table>

Detector A 254nm

| Peak  | RetTime | Area     | Height | Area%  |
|-------|---------|----------|--------|--------|
| 1     | 12.772  | 8748129  | 192375 | 50.157 |
| 2     | 17.190  | 8693320  | 144616 | 49.843 |
| Total |         | 17441449 | 336991 |        |

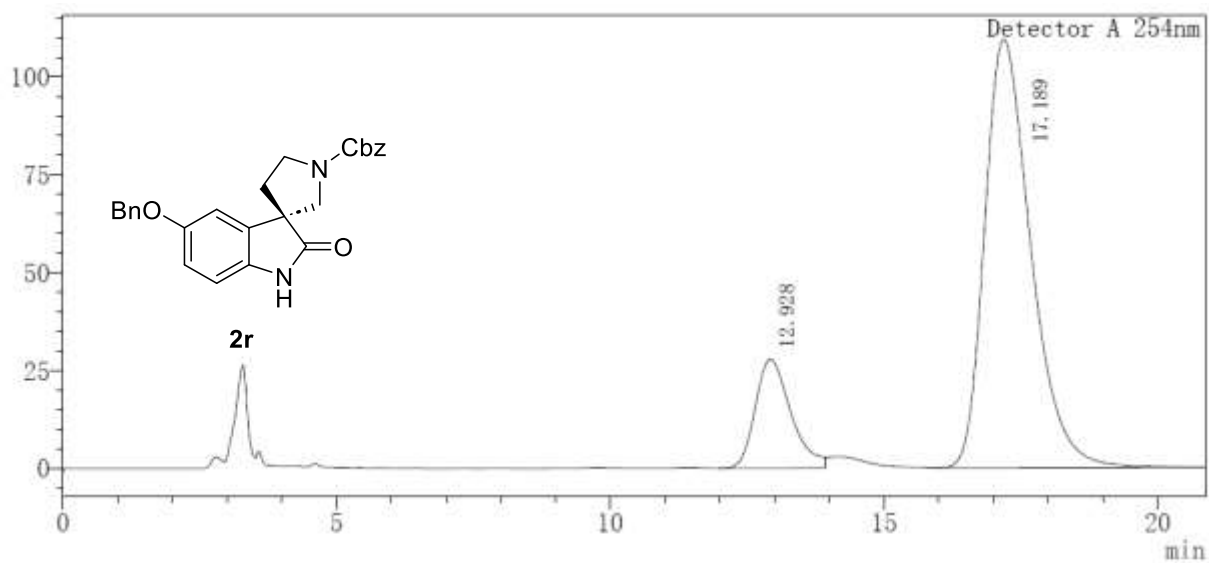

<Peak Table>

Detector A 254nm

| Peak  | RetTime | Area    | Height | Area%  |
|-------|---------|---------|--------|--------|
| 1     | 12.928  | 1257853 | 27862  | 16.377 |
| 2     | 17.189  | 6422840 | 109475 | 83.623 |
| Total |         | 7680693 | 137338 |        |

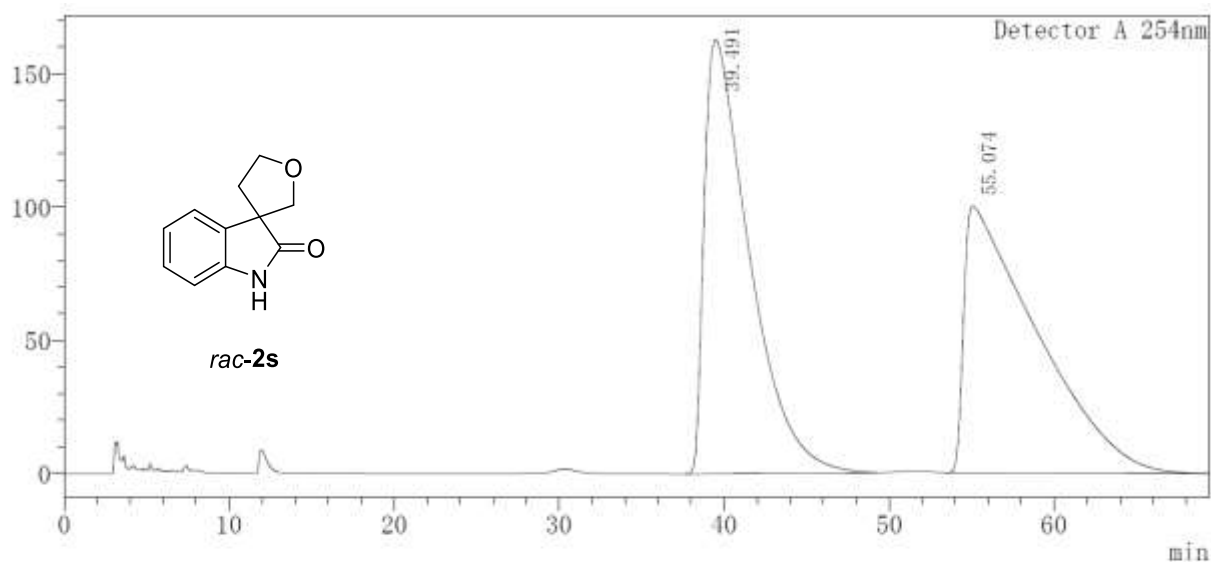

<Peak Table>

Detector A 254nm

| Peak  | RetTime | Area     | Height | Area%  |
|-------|---------|----------|--------|--------|
| 1     | 39.491  | 30885888 | 162602 | 50.114 |
| 2     | 55.074  | 30744757 | 99868  | 49.886 |
| Total |         | 61630645 | 262470 |        |

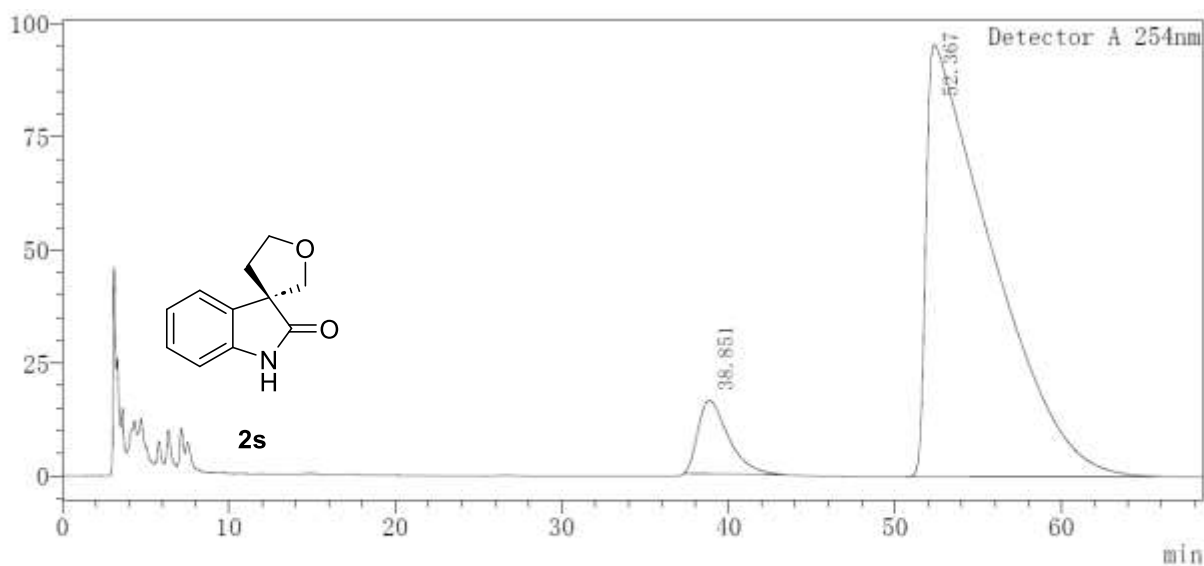

<Peak Table>

Detector A 254nm

| Peak  | RetTime | Area     | Height | Area%  |
|-------|---------|----------|--------|--------|
| 1     | 38.851  | 2056003  | 16168  | 7.277  |
| 2     | 52.367  | 26195654 | 95511  | 92.723 |
| Total |         | 28251657 | 111679 |        |

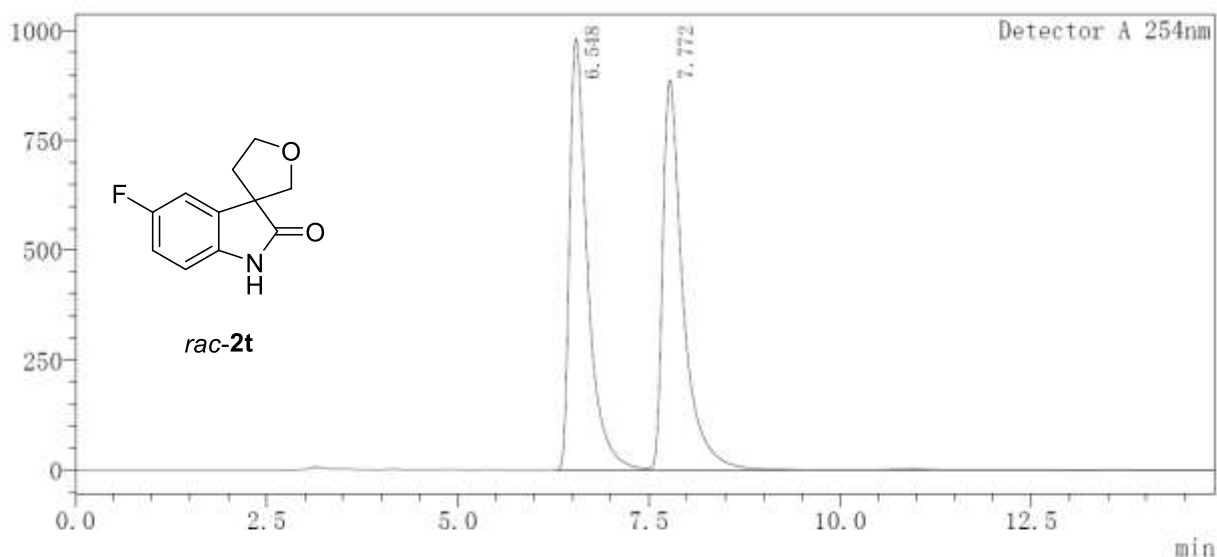

<Peak Table>

Detector A 254nm

| Peak  | RetTime | Area     | Height  | Area%  |
|-------|---------|----------|---------|--------|
| 1     | 6.548   | 16034306 | 981155  | 49.342 |
| 2     | 7.772   | 16462086 | 887183  | 50.658 |
| Total |         | 32496392 | 1868338 |        |

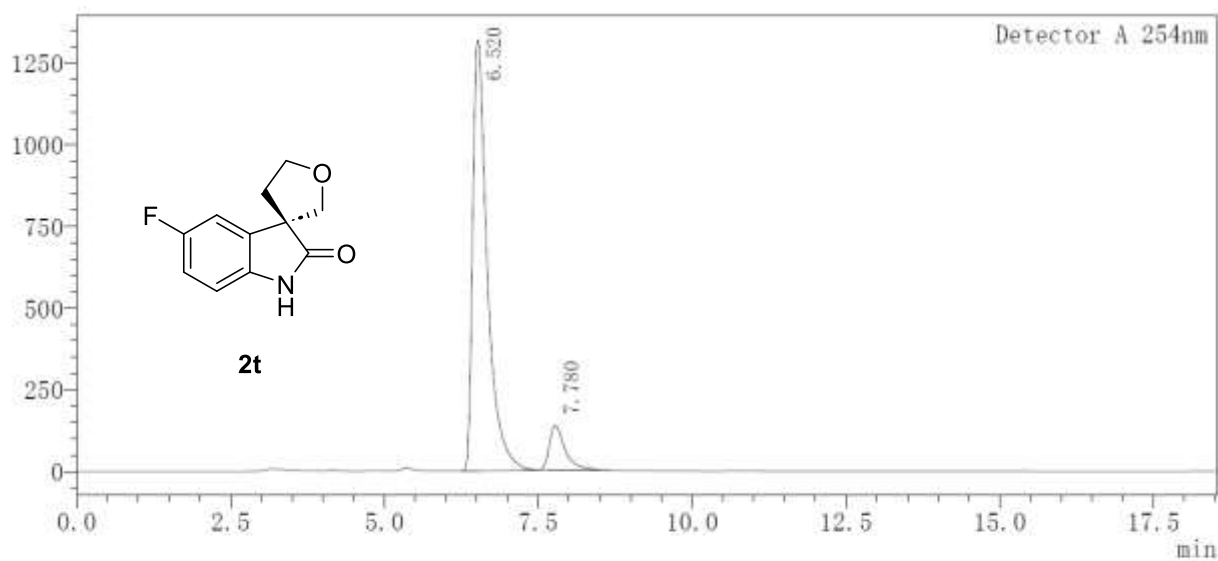

<Peak Table>

Detector A 254nm

| Peak  | RetTime | Area     | Height  | Area%  |
|-------|---------|----------|---------|--------|
| 1     | 6.520   | 21867056 | 1319331 | 90.021 |
| 2     | 7.780   | 2423877  | 136938  | 9.979  |
| Total |         | 24290933 | 1456269 |        |

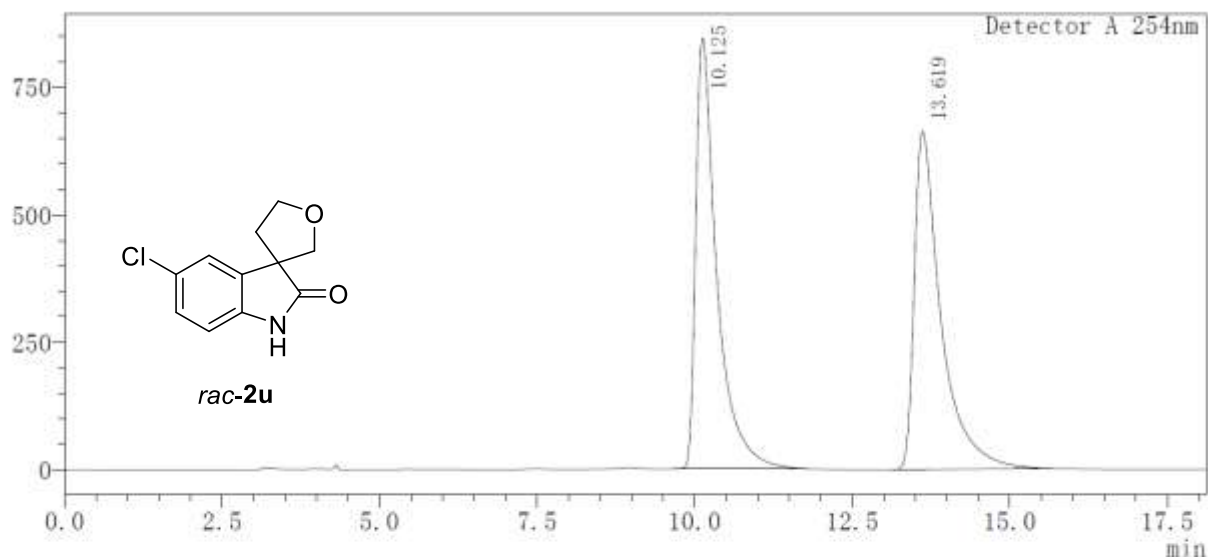

<Peak Table>

Detector A 254nm

| Peak  | RetTime | Area     | Height  | Area%  |
|-------|---------|----------|---------|--------|
| 1     | 10.125  | 19642796 | 843182  | 50.149 |
| 2     | 13.619  | 19526289 | 661816  | 49.851 |
| Total |         | 39169086 | 1504998 |        |

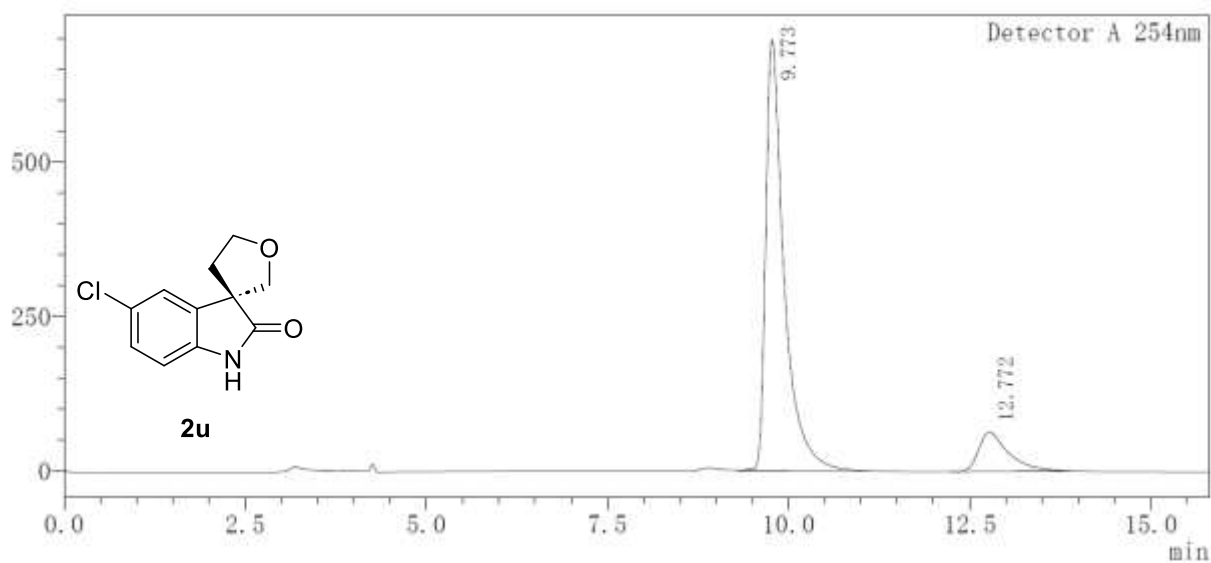

<Peak Table>

Detector A 254nm

| Peak  | RetTime | Area     | Height | Area%  |
|-------|---------|----------|--------|--------|
| 1     | 9.773   | 12371237 | 698285 | 87.091 |
| 2     | 12.772  | 1833648  | 63610  | 12.909 |
| Total |         | 14204885 | 761894 |        |

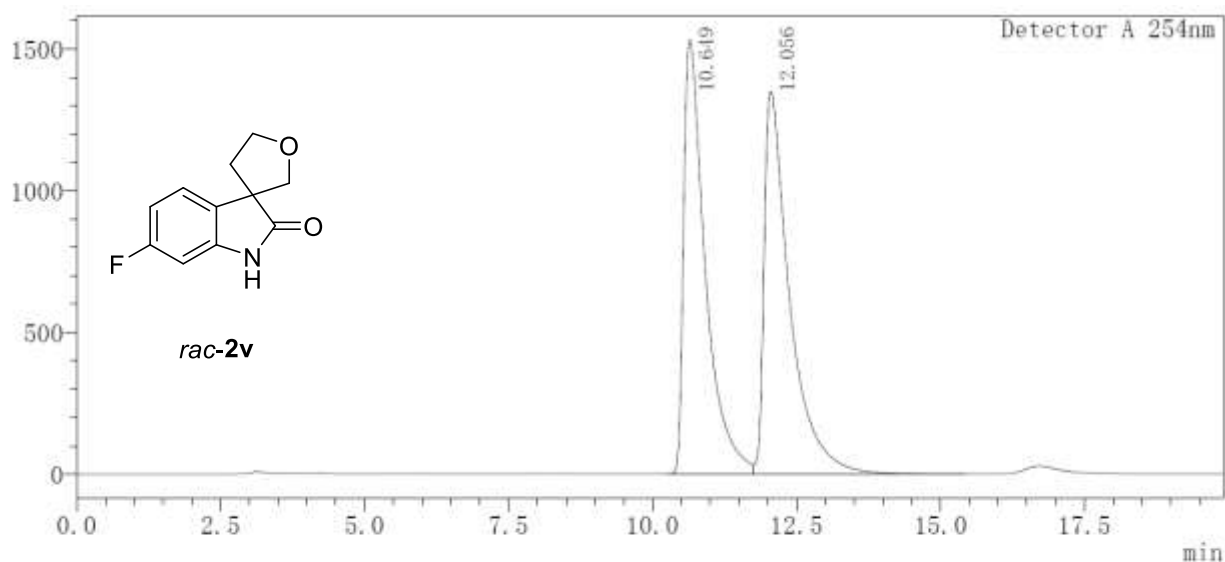

<Peak Table>

Detector A 254nm

| Peak  | RetTime | Area     | Height  | Area%  |
|-------|---------|----------|---------|--------|
| 1     | 10.649  | 40085219 | 1531116 | 49.040 |
| 2     | 12.056  | 41654035 | 1350983 | 50.960 |
| Total |         | 81739254 | 2882099 |        |

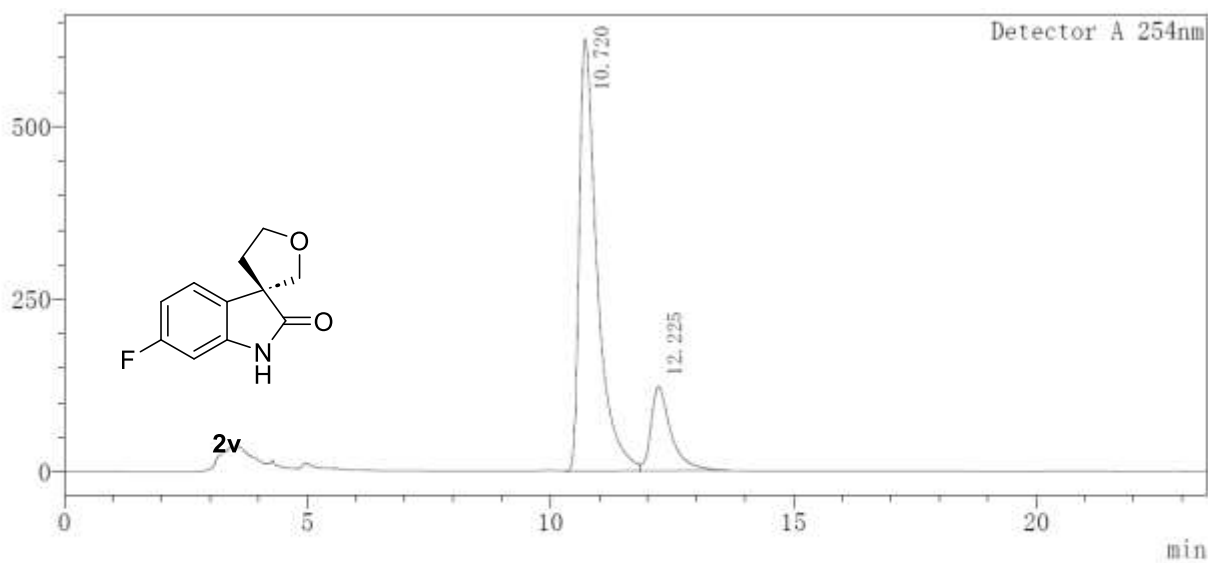

<Peak Table>

Detector A 254nm

| Peak  | RetTime | Area     | Height | Area%  |
|-------|---------|----------|--------|--------|
| 1     | 10.720  | 16014361 | 626116 | 82.017 |
| 2     | 12.225  | 3511224  | 122174 | 17.983 |
| Total |         | 19525585 | 748290 |        |

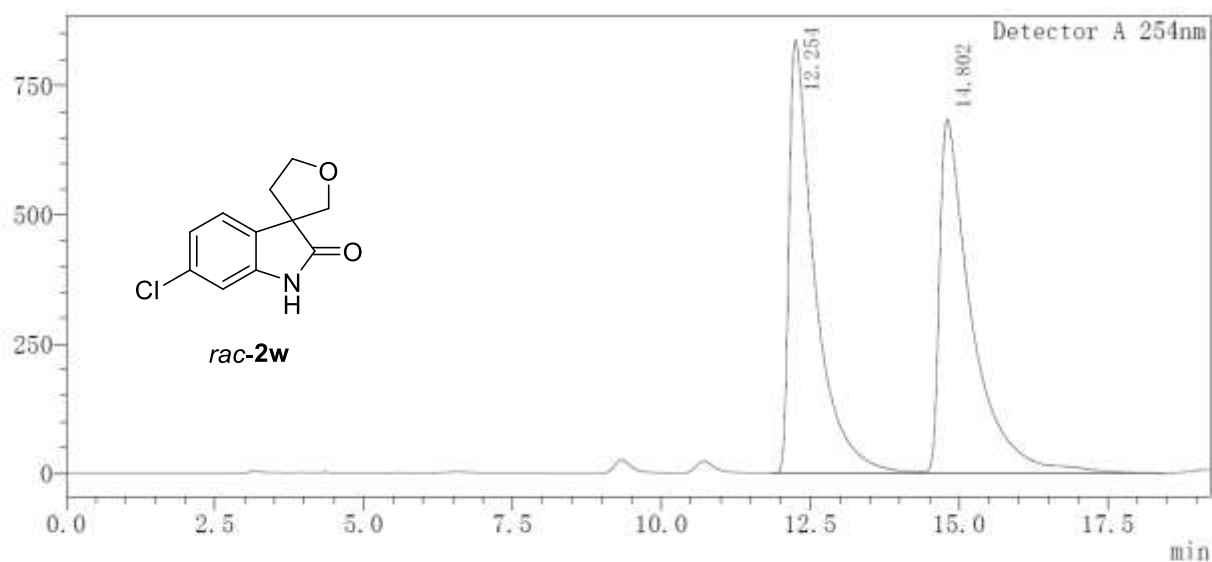

<Peak Table>

Detector A 254nm

| Peak  | RetTime | Area     | Height  | Area%  |  |  |  |
|-------|---------|----------|---------|--------|--|--|--|
| 1     | 12.254  | 25102377 | 837638  | 49.448 |  |  |  |
| 2     | 14.802  | 25663284 | 684648  | 50.552 |  |  |  |
| Total |         | 50765661 | 1522287 |        |  |  |  |

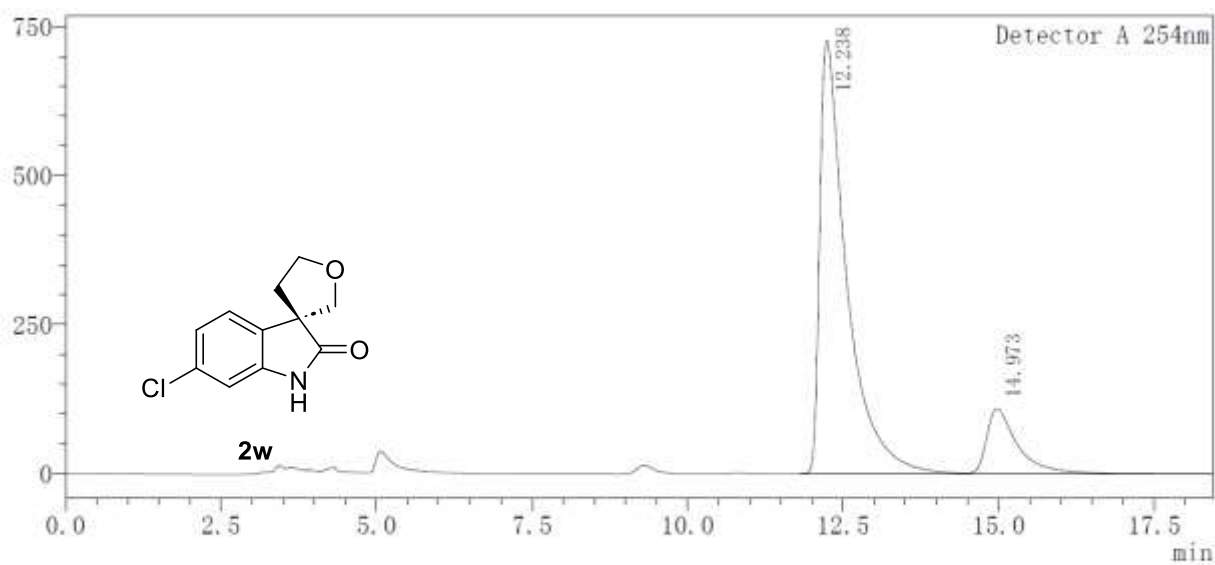

<Peak Table>

Detector A 254nm

| Peak  | RetTime | Area     | Height | Area%  |  |  |  |
|-------|---------|----------|--------|--------|--|--|--|
| 1     | 12.238  | 21983496 | 727769 | 85.020 |  |  |  |
| 2     | 14.973  | 3873479  | 109742 | 14.980 |  |  |  |
| Total |         | 25856975 | 837511 |        |  |  |  |

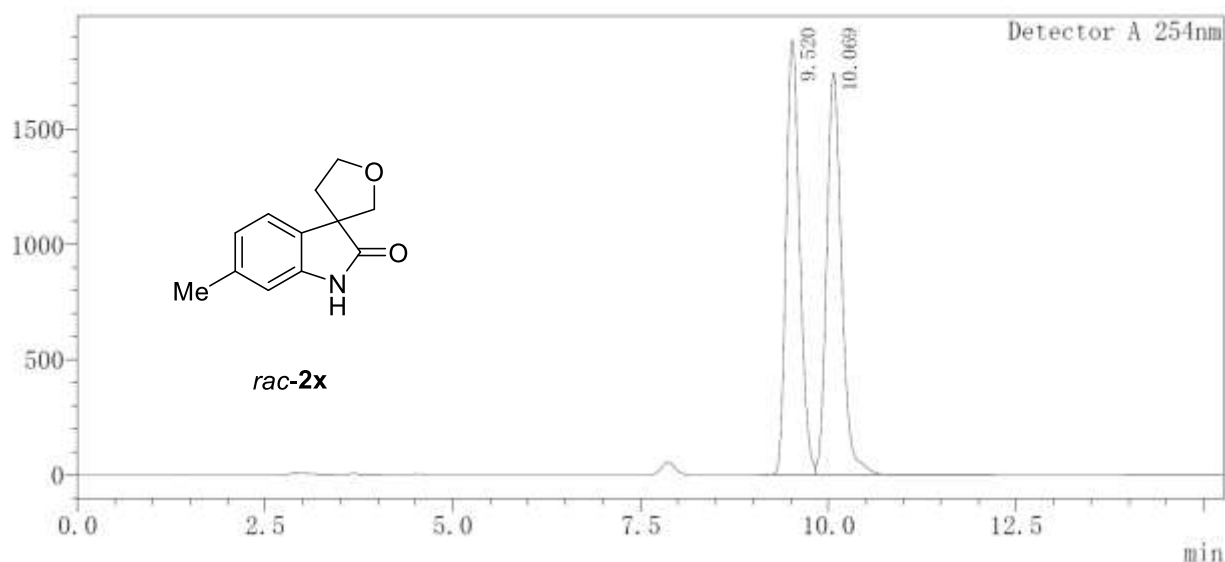

<Peak Table>

Detector A 254nm

| Peak  | RetTime | Area     | Height  | Area%  |
|-------|---------|----------|---------|--------|
| 1     | 9.520   | 23740196 | 1884112 | 49.505 |
| 2     | 10.069  | 24215246 | 1744193 | 50.495 |
| Total |         | 47955442 | 3628306 |        |

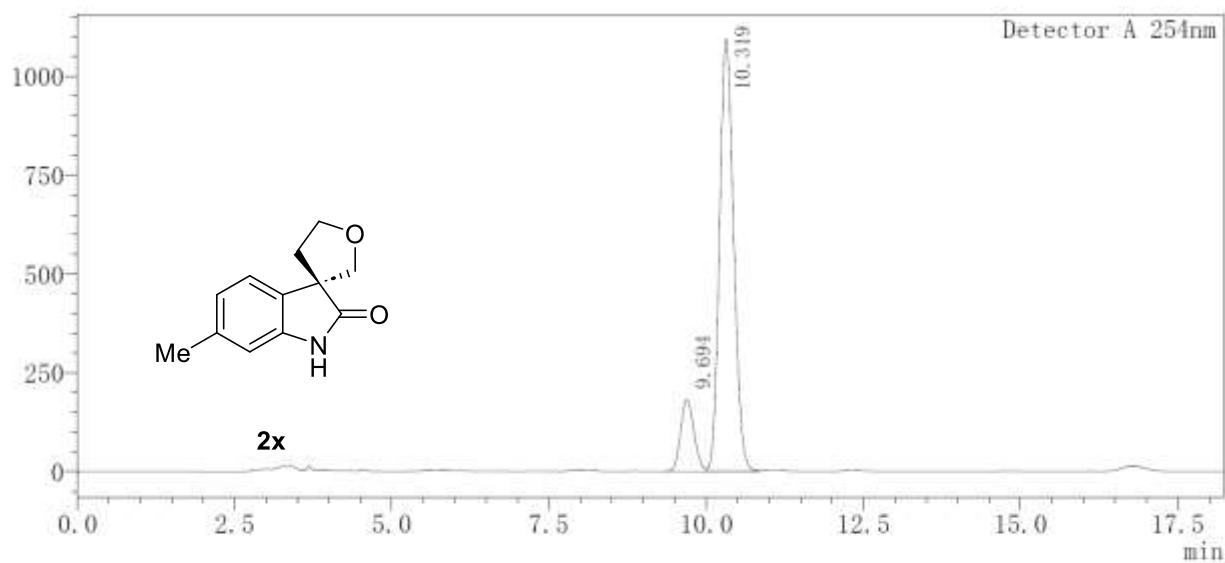

<Peak Table>

Detector A 254nm

| Peak  | RetTime | Area     | Height  | Area%  |
|-------|---------|----------|---------|--------|
| 1     | 9.694   | 2708156  | 182664  | 13.660 |
| 2     | 10.319  | 17118003 | 1095108 | 86.340 |
| Total |         | 19826159 | 1277772 |        |

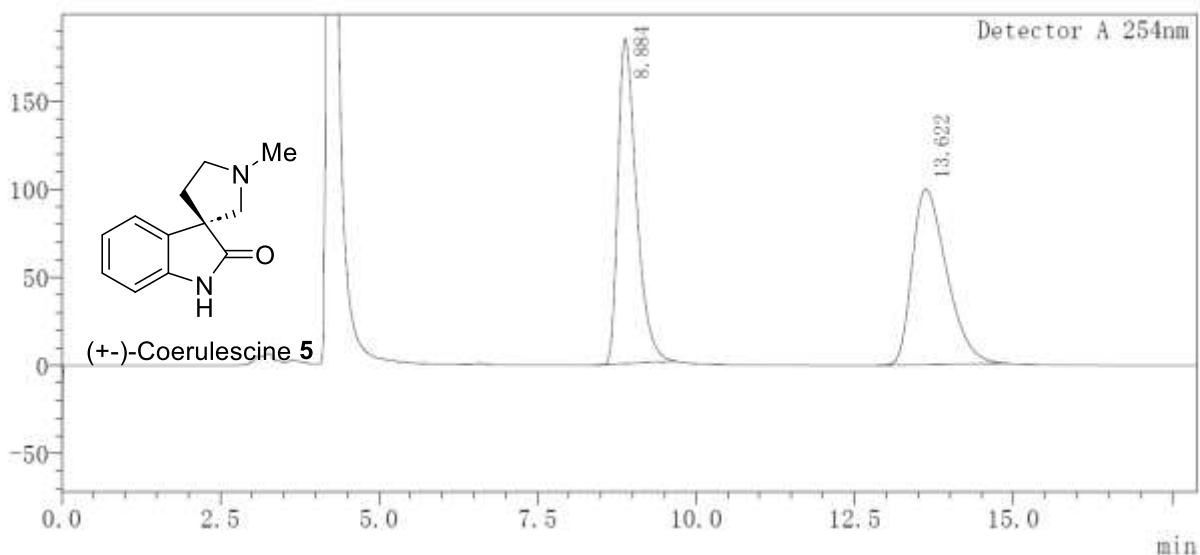

<Peak Table>

Detector A 254nm

| Peak  | RetTime | Area    | Height | Area%  |
|-------|---------|---------|--------|--------|
| 1     | 8.884   | 3743974 | 184690 | 49.791 |
| 2     | 13.622  | 3775353 | 99574  | 50.209 |
| Total |         | 7519327 | 284264 |        |

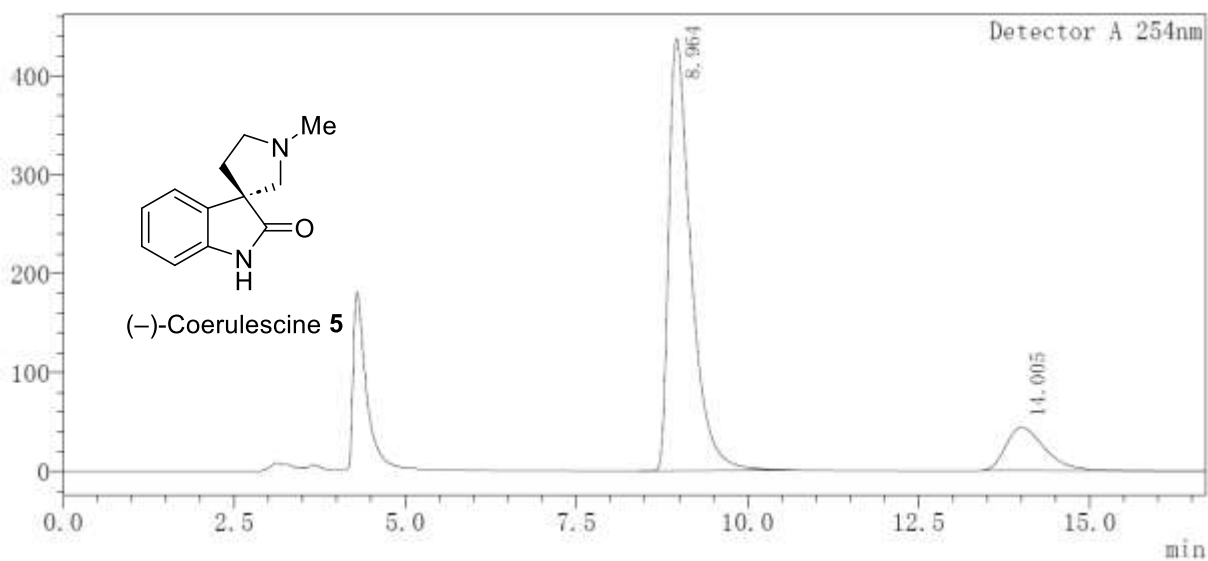

<Peak Table>

Detector A 254nm

| Peak  | RetTime | Area     | Height | Area%  |
|-------|---------|----------|--------|--------|
| 1     | 8.964   | 9854734  | 437217 | 85.085 |
| 2     | 14.005  | 1727422  | 43586  | 14.915 |
| Total |         | 11582156 | 480803 |        |
